# Supplementary material for: The Molecular Logic of Gtr1/2 and Pib2 Dependent TORC1 Regulation in Budding Yeast
Source: bioRxiv preprint, doi:10.1101/2023.12.06.570342, version 2 (2025-05-19)
Supplement: Table S7 [file 570342_file19.xlsx]

## Sheet: Proteins 1% FDR
Protein FDR Confidence: Combined	Master	Accession	Description	Exp. q-value: Combined	Sum PEP Score	Coverage [%]	# Peptides	# PSMs	# Unique Peptides	# Protein Groups	# AAs	MW [kDa]	calc. pI	Score Sequest HT: Sequest HT	# Peptides (by Search Engine): Sequest HT
High	Master Protein	YIL074C	SER33 SGDID:S000001336, Chr IX from 222490-221081, Genome Release 64-2-1, reverse complement, Verified ORF, "3-phosphoglycerate dehydrogenase; catalyzes the first step in serine and glycine biosynthesis; SER33 has a paralog, SER3, that arose from the whole genome duplication"	0	280.564	68	31	512	17	1	469	51.2	6.42	1341.74	31
	Confidence	Sequence	Modifications	Qvality PEP	Qvality q-value	# Protein Groups	# Proteins	# PSMs	Master Protein Accessions	# Missed Cleavages	Theo. MH+ [Da]	Confidence (by Search Engine): Sequest HT	Percolator q-Value (by Search Engine): Sequest HT	Percolator PEP (by Search Engine): Sequest HT	XCorr (by Search Engine): Sequest HT
	High	NLVCIGCFCIGTNQVDLK	3xCarbamidomethyl [C4; C7; C9]	0.00639373	0	1	1	1	YIL074C	0	2111.01	High	0	0.003801	2.33
	High	SDFVTLHVPATPETEK		4.2367e-09	0	2	2	36	YIL074C; YER081W	0	1770.89	High	0	8.99e-10	5.66
	High	SDFVTLHVPATPETEK	1xPhospho [T14(84.7)]	0.0177599	0	2	2	2	YIL074C; YER081W	0	1850.86	High	0	0.01139	3.07
	High	SDFVTLHVPATPETEKMLSAPQFAAMK	2xOxidation [M17; M26]	0.00093527	0	2	2	1	YIL074C; YER081W	1	2978.46	High	0	0.0004843	3.25
	High	QVSTLDELLNK		0.000103575	0	2	2	24	YIL074C; YER081W	0	1259.68	High	0	7.176e-05	3.3
	High	QFSDSHGEIAYLMADISSVNQSEIKDIYEK	1xOxidation [M13]	4.3955e-08	0	1	1	4	YIL074C	1	3433.61	High	0	1.101e-08	5.4
	High	QFSDSHGEIAYLMADISSVNQSEIK	1xOxidation [M13]	5.46661e-08	0	1	1	6	YIL074C	0	2785.3	High	0	3.109e-07	6.62
	High	QFSDSHGEIAYLMADISSVNQSEIK		3.52735e-05	0	1	1	3	YIL074C	0	2769.3	High	0	1.433e-05	4.2
	High	IKDVHAIGIR		0.0034371	0	2	2	11	YIL074C; YER081W	1	1121.68	High	0	0.003495	3.55
	High	LNQTSAKVSIR		0.00575288	0	1	1	1	YIL074C	1	1216.7	High	0	0.003401	2.6
	High	MLSAPQFAAMKDGAYVINASR	2xOxidation [M1; M10]	5.56017e-07	0	2	2	2	YIL074C; YER081W	1	2273.11	High	0	1.675e-07	4.76
	High	MLSAPQFAAMKDGAYVINASR	1xOxidation [M1]	0.00749104	0	2	2	1	YIL074C; YER081W	1	2257.11	High	0	0.0045	2.78
	High	MLSAPQFAAMK	2xOxidation [M1; M10]	2.79897e-05	0	2	2	35	YIL074C; YER081W	0	1226.59	High	0	0.0004293	3.57
	High	MLSAPQFAAMK	1xOxidation [M]	2.38846e-05	0	2	2	22	YIL074C; YER081W	0	1210.6	High	0	0.0004602	3.5
	High	MLSAPQFAAMK		0.000306146	0	2	2	2	YIL074C; YER081W	0	1194.6	High	0	0.0001458	2.59
	High	TVNDILSDHNIEK		1.83366e-05	0	1	1	38	YIL074C	0	1497.75	High	0	7.123e-06	4.02
	High	YINEGNSVGSVNFPEVSLK		1.95717e-07	0	1	1	6	YIL074C	0	2053.02	High	0	5.461e-08	5.67
	High	SSLPEDELIEK		0.00184716	0	1	1	12	YIL074C	0	1259.64	High	0	0.007526	2.45
	High	SVAELVIGEIISLAR		9.40694e-06	0	1	1	4	YIL074C	0	1569.92	High	0	3.47e-06	4.83
	High	SIELHTGTWNK		4.21637e-05	0	2	2	24	YIL074C; YER081W	0	1285.65	High	0	1.738e-05	3.59
	High	SLDYDQENTVR		3.59798e-05	0	1	1	31	YIL074C	0	1339.61	High	0	0.0002013	3.22
	High	DQGYQVEFHK		0.00014413	0	1	1	19	YIL074C	0	1250.58	High	0	0.0003249	3.37
	High	DVHAIGIR		0.0394959	0	2	2	6	YIL074C; YER081W	0	880.5	High	0.005416	0.07071	2.23
	High	DIYEKLNQTSAK		0.0320509	0	1	1	1	YIL074C	1	1409.73	High	0	0.02152	2
	High	ALKPFSTGDMNILLLENVNATAIK	1xOxidation [M10]; 1xPhospho [S6(78.6)]	0.00542102	0	1	1	2	YIL074C	0	2669.36	High	0	0.003194	2.72
	High	ALKPFSTGDMNILLLENVNATAIK	1xOxidation [M10]	1.77913e-06	0	1	1	9	YIL074C	0	2589.4	High	0	5.979e-07	5.45
	High	ALKPFSTGDMNILLLENVNATAIK		2.50644e-08	0	1	1	3	YIL074C	0	2573.4	High	0	6.025e-09	5.93
	High	AMNFSGSPGAVSTSPTQSFMNTLPR	2xOxidation [M2; M20]; 2xPhospho [S5(86.1); S18(99.5)]	0.0246645	0	1	1	5	YIL074C	0	2777.13	High	0	0.02473	4.05
	High	AMNFSGSPGAVSTSPTQSFMNTLPR	1xOxidation [M]; 1xPhospho [S/T]	2.77554e-09	0	1	1	11	YIL074C	0	2681.17	High	0	2.072e-08	6.32
	High	AMNFSGSPGAVSTSPTQSFMNTLPR	1xPhospho [S7(84.4)]	0.00120222	0	1	1	2	YIL074C	0	2665.18	High	0	0.0006385	3.27
	High	AMNFSGSPGAVSTSPTQSFMNTLPR	2xOxidation [M2; M20]	1.92973e-09	0	1	1	20	YIL074C	0	2617.2	High	0	9.497e-09	6.35
	High	AMNFSGSPGAVSTSPTQSFMNTLPR	1xOxidation [M]	1.8425e-09	0	1	1	8	YIL074C	0	2601.21	High	0	3.658e-10	6.72
	High	AMNFSGSPGAVSTSPTQSFMNTLPR		2.28701e-06	0	1	1	1	YIL074C	0	2585.21	High	0	7.638e-07	5.09
	High	AMNFSGSPGAVSTSPTQSFMNTLPR	2xOxidation [M2; M20]; 1xPhospho [S/T]	3.87684e-08	0	1	1	13	YIL074C	0	2697.17	High	0	9.613e-09	7.03
	High	DGAYVINASR		0.000380747	0	2	2	26	YIL074C; YER081W	0	1065.53	High	0	0.0005802	3.51
	High	GTVVDIPSLIQAVK		1.82158e-05	0	2	2	20	YIL074C; YER081W	0	1439.85	High	0	0.001162	3.51
	High	GTVVDIPSLIQAVKANK		0.00453582	0	2	2	1	YIL074C; YER081W	1	1753.02	High	0	0.002631	2.89
	High	IAGAALDVYPHEPAK		5.37945e-07	0	2	2	47	YIL074C; YER081W	0	1551.82	High	0	0.0003266	5.52
	High	IFKDQGYQVEFHK		0.000526334	0	1	1	7	YIL074C	1	1638.83	High	0	0.0002612	4.03
	High	GIAVFNSPFSNSR		1.38924e-05	0	2	2	35	YIL074C; YER081W	0	1395.7	High	0	9.72e-05	4.09
	High	NVPGVLK		0.0495845	0.00120145	1	1	2	YIL074C	0	726.451	High	0.00835	0.1005	1.4
	High	QVSTLDELLNKSDFVTLHVPATPETEK		0.0492641	0.00120145	2	2	1	YIL074C; YER081W	1	3011.56	High	0.0007987	0.03415	2.92
	High	SSLPEDELIEKIK		0.0877901	0.00571894	1	1	1	YIL074C	1	1500.82	High	0.004177	0.06376	2.12
	High	VLYIHR		0.0883482	0.00571894	1	1	5	YIL074C	0	800.478	High	0.009486	0.1037	1.84
	High	QFSDSHGEIAYLMADISSVNQSEIKDIYEK		0.0911893	0.00669635	1	1	1	YIL074C	1	3417.62	High	0.004826	0.06622	2.06
High	Master Protein	YER081W	SER3 SGDID:S000000883, Chr V from 322686-324095, Genome Release 64-2-1, Verified ORF, "3-phosphoglycerate dehydrogenase; catalyzes the first step in serine and glycine biosynthesis; SER3 has a paralog, SER33, that arose from the whole genome duplication"	0	185.364	59	25	369	11	1	469	51.2	5.57	936.67	25
	Confidence	Sequence	Modifications	Qvality PEP	Qvality q-value	# Protein Groups	# Proteins	# PSMs	Master Protein Accessions	# Missed Cleavages	Theo. MH+ [Da]	Confidence (by Search Engine): Sequest HT	Percolator q-Value (by Search Engine): Sequest HT	Percolator PEP (by Search Engine): Sequest HT	XCorr (by Search Engine): Sequest HT
	High	NLVCIGCFCIGTNQVDLDYATSR	3xCarbamidomethyl [C4; C7; C9]	6.28041e-08	0	1	1	1	YER081W	0	2676.22	High	0	1.617e-08	3.99
	High	SDFVTLHVPATPETEK		4.2367e-09	0	2	2	36	YIL074C; YER081W	0	1770.89	High	0	8.99e-10	5.66
	High	SDFVTLHVPATPETEK	1xPhospho [T14(84.7)]	0.0177599	0	2	2	2	YIL074C; YER081W	0	1850.86	High	0	0.01139	3.07
	High	SDFVTLHVPATPETEKMLSAPQFAAMK	2xOxidation [M17; M26]	0.00093527	0	2	2	1	YIL074C; YER081W	1	2978.46	High	0	0.0004843	3.25
	High	QVSTLDELLNK		0.000103575	0	2	2	24	YIL074C; YER081W	0	1259.68	High	0	7.176e-05	3.3
	High	QFSDSNGEIAYLMADISSVDQSDIK	1xOxidation [M13]	0.00272763	0	1	1	1	YER081W	0	2749.25	High	0	0.001527	2.55
	High	ILKPFSTGDMK	1xOxidation [M10]	0.00269183	0	1	1	16	YER081W	0	1252.66	High	0.002933	0.05335	2.94
	High	ILKPFSTGDMK		0.000335821	0	1	1	4	YER081W	0	1236.67	High	0	0.0001616	2.81
	High	IKDVHAIGIR		0.0034371	0	2	2	11	YIL074C; YER081W	1	1121.68	High	0	0.003495	3.55
	High	LTSNVLQHAK		0.00171767	0	1	1	5	YER081W	0	1110.63	High	0	0.0009282	3.02
	High	MLSAPQFAAMKDGAYVINASR	2xOxidation [M1; M10]	5.56017e-07	0	2	2	2	YIL074C; YER081W	1	2273.11	High	0	1.675e-07	4.76
	High	MLSAPQFAAMKDGAYVINASR	1xOxidation [M1]	0.00749104	0	2	2	1	YIL074C; YER081W	1	2257.11	High	0	0.0045	2.78
	High	MLSAPQFAAMK	2xOxidation [M1; M10]	2.79897e-05	0	2	2	35	YIL074C; YER081W	0	1226.59	High	0	0.0004293	3.57
	High	MLSAPQFAAMK	1xOxidation [M]	2.38846e-05	0	2	2	22	YIL074C; YER081W	0	1210.6	High	0	0.0004602	3.5
	High	MLSAPQFAAMK		0.000306146	0	2	2	2	YIL074C; YER081W	0	1194.6	High	0	0.0001458	2.59
	High	VLYIHQNVPGVLK		0.00010635	0	1	1	14	YER081W	0	1479.87	High	0	4.685e-05	3.86
	High	TVNDILSNHNIEK		1.93873e-06	0	1	1	7	YER081W	0	1496.77	High	0	6.412e-07	4.47
	High	YINEGNSVGSVNFPEVALK		1.05555e-06	0	1	1	3	YER081W	0	2037.03	High	0	3.342e-07	5.89
	High	SSLPEEELIEK		0.0026565	0	1	1	4	YER081W	0	1273.65	High	0.0007987	0.03681	2.54
	High	SVAELVIAEIISLAR		3.02997e-05	0	1	1	2	YER081W	0	1583.94	High	0	6.493e-05	4.3
	High	SIELHTGTWNK		4.21637e-05	0	2	2	24	YIL074C; YER081W	0	1285.65	High	0	1.738e-05	3.59
	High	SLSYDQENTVR		0.000162336	0	1	1	11	YER081W	0	1311.62	High	0	0.0001582	2.71
	High	DVHAIGIR		0.0394959	0	2	2	6	YIL074C; YER081W	0	880.5	High	0.005416	0.07071	2.23
	High	DIYEQLNQTSAK		0.00160785	0	1	1	5	YER081W	0	1409.69	High	0	0.0008624	3.54
	High	DGAYVINASR		0.000380747	0	2	2	26	YIL074C; YER081W	0	1065.53	High	0	0.0005802	3.51
	High	GTVVDIPSLIQAVK		1.82158e-05	0	2	2	20	YIL074C; YER081W	0	1439.85	High	0	0.001162	3.51
	High	GTVVDIPSLIQAVKANK		0.00453582	0	2	2	1	YIL074C; YER081W	1	1753.02	High	0	0.002631	2.89
	High	IAGAALDVYPHEPAK		5.37945e-07	0	2	2	47	YIL074C; YER081W	0	1551.82	High	0	0.0003266	5.52
	High	GIAVFNSPFSNSR		1.38924e-05	0	2	2	35	YIL074C; YER081W	0	1395.7	High	0	9.72e-05	4.09
	High	QVSTLDELLNKSDFVTLHVPATPETEK		0.0492641	0.00120145	2	2	1	YIL074C; YER081W	1	3011.56	High	0.0007987	0.03415	2.92
High	Master Protein	IPI00556624 IPI:IPI00556624.1	TREMBL:Q6GSJ0 REFSEQ_NP:NP_006112|ENSEMBL:ENSP00000252244 Tax_Id=9606 Keratin 1	0	157.849	51	39	120	33	1	644	66	8.12	299.65	39
	Confidence	Sequence	Modifications	Qvality PEP	Qvality q-value	# Protein Groups	# Proteins	# PSMs	Master Protein Accessions	# Missed Cleavages	Theo. MH+ [Da]	Confidence (by Search Engine): Sequest HT	Percolator q-Value (by Search Engine): Sequest HT	Percolator PEP (by Search Engine): Sequest HT	XCorr (by Search Engine): Sequest HT
	High	NMQDMVEDYR	2xOxidation [M2; M5]	0.000898915	0	1	2	11	IPI00556624 IPI:IPI00556624.1	0	1332.52	High	0	0.0004642	3.19
	High	NMQDMVEDYR	1xOxidation [M]	0.000858282	0	1	2	2	IPI00556624 IPI:IPI00556624.1	0	1316.52	High	0	0.0004406	2.62
	High	NMQDMVEDYR		0.00545693	0	1	2	1	IPI00556624 IPI:IPI00556624.1	0	1300.53	High	0	0.003205	2.87
	High	NKYEDEINKR		0.00251975	0	4	10	4	IPI00300725 IPI:IPI00300725.6; IPI00009867 IPI:IPI00009867.2; IPI00293665 IPI:IPI00293665.6; IPI00556624 IPI:IPI00556624.1	2	1308.65	High	0	0.001403	3.68
	High	NKLNDLEDALQQAKEDLAR		0.00527973	0	1	2	1	IPI00556624 IPI:IPI00556624.1	2	2184.13	High	0	0.003092	2.89
	High	SEIDNVKK		0.0387312	0	1	2	2	IPI00556624 IPI:IPI00556624.1	1	932.505	High	0	0.02639	2.14
	High	QISNLQQSISDAEQR		5.10244e-07	0	1	2	4	IPI00556624 IPI:IPI00556624.1	0	1716.85	High	0	1.525e-07	4.63
	High	LNDLEDALQQAKEDLAR		0.01173	0	1	2	1	IPI00556624 IPI:IPI00556624.1	1	1941.99	High	0	0.007269	2.63
	High	LNDLEDALQQAK		7.05989e-05	0	1	2	2	IPI00556624 IPI:IPI00556624.1	0	1357.7	High	0	3.034e-05	3.69
	High	MSGECAPNVSVSVSTSHTTISGGGSR	1xCarbamidomethyl [C5]	2.76222e-05	0	1	2	1	IPI00556624 IPI:IPI00556624.1	0	2565.17	High	0	1.104e-05	3.09
	High	YEELQITAGR		0.000847014	0	1	2	3	IPI00556624 IPI:IPI00556624.1	0	1179.6	High	0	0.0006319	3.2
	High	WELLQQVDTSTR		2.43629e-05	0	1	2	2	IPI00556624 IPI:IPI00556624.1	0	1475.75	High	0	9.653e-06	4.05
	High	SGGGFSSGSAGIINYQR		7.38751e-07	0	1	2	2	IPI00556624 IPI:IPI00556624.1	0	1657.79	High	0	2.277e-07	4.45
	High	SLDLDSIIAEVK		1.77406e-05	0	1	2	5	IPI00556624 IPI:IPI00556624.1	0	1302.72	High	0	6.851e-06	3.6
	High	SKAEAESLYQSK		0.0036236	0	1	2	3	IPI00556624 IPI:IPI00556624.1	1	1340.67	High	0	0.00207	3.84
	High	SLVNLGGSK		0.00379506	0	1	2	2	IPI00556624 IPI:IPI00556624.1	0	874.499	High	0	0.00217	2.3
	High	SISISVAR		0.0170727	0	1	2	2	IPI00556624 IPI:IPI00556624.1	0	832.489	High	0	0.01836	1.98
	High	SLNNQFASFIDKVR		0.0473836	0	1	2	1	IPI00556624 IPI:IPI00556624.1	1	1638.86	High	0	0.03274	1.83
	High	SLNNQFASFIDK		2.76222e-05	0	1	2	4	IPI00556624 IPI:IPI00556624.1	0	1383.69	High	0	1.103e-05	3.77
	High	TLLEGEESR		0.0104177	0	1	2	2	IPI00556624 IPI:IPI00556624.1	0	1033.52	High	0	0.006414	1.76
	High	TNAENEFVTIKK		3.84378e-05	0	1	2	2	IPI00556624 IPI:IPI00556624.1	1	1393.73	High	0	1.578e-05	3.63
	High	TNAENEFVTIK		0.000136709	0	1	2	2	IPI00556624 IPI:IPI00556624.1	0	1265.64	High	0	0.0001642	3.47
	High	THNLEPYFESFINNLR		0.000238162	0	1	2	3	IPI00556624 IPI:IPI00556624.1	0	1993.98	High	0	0.0001118	4.6
	High	DVDGAYMTK	1xOxidation [M7]	0.00389665	0	1	2	5	IPI00556624 IPI:IPI00556624.1	0	1015.44	High	0	0.00223	2.45
	High	DYQELMNTK	1xOxidation [M6]	0.00341447	0	1	2	2	IPI00556624 IPI:IPI00556624.1	0	1157.51	High	0	0.001941	2.61
	High	DYQELMNTK		0.0212085	0	1	2	2	IPI00556624 IPI:IPI00556624.1	0	1141.52	High	0	0.0161	2.12
	High	FSSCGGGGGSFGAGGGFGSR	1xCarbamidomethyl [C4]	2.29355e-07	0	1	2	4	IPI00556624 IPI:IPI00556624.1	0	1765.73	High	0	6.48e-08	4.51
	High	FLEQQNQVLQTK		6.43603e-05	0	3	4	6	sp; IPI00376379 IPI:IPI00376379.1; IPI00556624 IPI:IPI00556624.1	0	1475.79	High	0	2.749e-05	4.09
	High	AEAESLYQSK		0.00024133	0	1	2	2	IPI00556624 IPI:IPI00556624.1	0	1125.54	High	0	0.0001127	3.41
	High	AQYEDIAQK		0.00263901	0	1	1	3	IPI00556624 IPI:IPI00556624.1	0	1065.52	High	0	0.001469	2.57
	High	IEISELNR		0.0087185	0	2	3	2	sp; IPI00556624 IPI:IPI00556624.1	0	973.531	High	0	0.01008	2.63
	High	LDSELKNMQDMVEDYR	2xOxidation [M8; M11]	0.000233487	0	1	2	1	IPI00556624 IPI:IPI00556624.1	1	2017.88	High	0	0.0001092	3.98
	High	LALDLEIATYR		0.000577351	0	3	7	4	IPI00290078 IPI:IPI00290078.2; IPI00431749 IPI:IPI00431749.1; IPI00556624 IPI:IPI00556624.1	0	1277.71	High	0	0.0002873	3.58
	High	KDVDGAYMTK	1xOxidation [M8]	0.00889274	0	1	2	3	IPI00556624 IPI:IPI00556624.1	1	1143.54	High	0	0.005424	3.13
	High	GENALKDAK		0.00564006	0	1	2	4	IPI00556624 IPI:IPI00556624.1	1	945.5	High	0	0.003318	2.93
	High	GSGGGSSGGSIGGR		1.31277e-06	0	1	2	16	IPI00556624 IPI:IPI00556624.1	0	1092.5	High	0	4.197e-07	4.1
	High	YEDEINK		0.0505579	0.00120145	7	16	1	IPI00290857 IPI:IPI00290857.1; IPI00300725 IPI:IPI00300725.6; sp; IPI00009867 IPI:IPI00009867.2; IPI00293665 IPI:IPI00293665.6; IPI00376379 IPI:IPI00376379.1; IPI00556624 IPI:IPI00556624.1	0	910.415	High	0.0007987	0.03516	1.59
	High	KQISNLQQSISDAEQR		0.0697861	0.0022289	1	2	1	IPI00556624 IPI:IPI00556624.1	1	1844.95	High	0.001487	0.04974	3.34
	High	NKLNDLEDALQQAK		0.0715973	0.0022289	1	2	1	IPI00556624 IPI:IPI00556624.1	1	1599.83	High	0.001487	0.05085	3.8
	High	YEDEINKR		0.0877901	0.00571894	7	15	1	IPI00290857 IPI:IPI00290857.1; IPI00300725 IPI:IPI00300725.6; sp; IPI00009867 IPI:IPI00009867.2; IPI00293665 IPI:IPI00293665.6; IPI00376379 IPI:IPI00376379.1; IPI00556624 IPI:IPI00556624.1	1	1066.52	High	0.004177	0.06359	1.76
	High	LRSEIDNVK		0.0935239	0.00669635	1	2	1	IPI00556624 IPI:IPI00556624.1	1	1073.59	High	0.004826	0.06801	2.46
	High	SEIDNVK		0.0971313	0.00757788	1	2	1	IPI00556624 IPI:IPI00556624.1	0	804.41	High	0.005416	0.07071	2.14
High	Master Protein	IPI00217963 IPI:IPI00217963.2	SWISS-PROT:P08779 TREMBL:Q16195|REFSEQ_NP:NP_005548|ENSEMBL:ENSP00000301653 Tax_Id=9606 Keratin, type I cytoskeletal 16	0	142.177	77	38	82	23	1	472	51.1	5.05	198.09	38
	Confidence	Sequence	Modifications	Qvality PEP	Qvality q-value	# Protein Groups	# Proteins	# PSMs	Master Protein Accessions	# Missed Cleavages	Theo. MH+ [Da]	Confidence (by Search Engine): Sequest HT	Percolator q-Value (by Search Engine): Sequest HT	Percolator PEP (by Search Engine): Sequest HT	XCorr (by Search Engine): Sequest HT
	High	NHEEEMLALR	1xOxidation [M6]	0.00586795	0	1	1	1	IPI00217963 IPI:IPI00217963.2	0	1257.59	High	0	0.00346	2.2
	High	RVLQGLEIELQSQLSMK	1xOxidation [M16]	0.00145614	0	1	1	1	IPI00217963 IPI:IPI00217963.2	1	1988.08	High	0	0.0007774	2.89
	High	RLLEGEDAHLSSQQASGQSYSSR		8.35196e-06	0	1	1	1	IPI00217963 IPI:IPI00217963.2	1	2506.19	High	0	3.06e-06	3.93
	High	QFTSSSSMK	1xOxidation [M8]	0.00142756	0	2	2	4	IPI00384444 IPI:IPI00384444.4; IPI00217963 IPI:IPI00217963.2	0	1018.45	High	0	0.0007615	2.85
	High	QTVEADVNGLR		0.00705909	0	1	1	1	IPI00217963 IPI:IPI00217963.2	0	1201.62	High	0	0.004226	2.71
	High	QRPSEIKDYSPYFK		0.0229471	0	1	1	1	IPI00217963 IPI:IPI00217963.2	1	1757.89	High	0	0.01495	2.2
	High	LLEGEDAHLSSQQASGQSYSSR		1.79982e-11	0	1	1	1	IPI00217963 IPI:IPI00217963.2	0	2350.09	High	0	2.56012e-12	5.22
	High	IIAATIENAQPILQIDNAR		0.000898915	0	1	1	3	IPI00217963 IPI:IPI00217963.2	0	2064.14	High	0	0.0004627	3.12
	High	ISSVLAGGSCR	1xCarbamidomethyl [C10]	7.4153e-06	0	2	2	2	IPI00384444 IPI:IPI00384444.4; IPI00217963 IPI:IPI00217963.2	0	1106.56	High	0	2.689e-06	3.11
	High	VLDELTLAR		0.00118644	0	3	8	2	IPI00384444 IPI:IPI00384444.4; IPI00217963 IPI:IPI00217963.2; IPI00450768 IPI:IPI00450768.4	0	1029.59	High	0	0.0006243	3.1
	High	VLQGLEIELQSQLSMK	1xOxidation [M15]	7.20125e-05	0	1	1	2	IPI00217963 IPI:IPI00217963.2	0	1831.98	High	0	3.081e-05	4.04
	High	YCMQLSQIQGLIGSVEEQLAQLR	1xCarbamidomethyl [C2]; 1xOxidation [M3]	0.0155702	0	1	1	1	IPI00217963 IPI:IPI00217963.2	0	2680.34	High	0	0.009869	3
	High	VTMQNLNDR	1xOxidation [M3]	0.00189662	0	4	8	17	IPI00384444 IPI:IPI00384444.4; IPI00328103 IPI:IPI00328103.1; sp; IPI00217963 IPI:IPI00217963.2	0	1106.53	High	0	0.002274	2.78
	High	VTMQNLNDR		0.00497513	0	4	8	1	IPI00384444 IPI:IPI00384444.4; IPI00328103 IPI:IPI00328103.1; sp; IPI00217963 IPI:IPI00217963.2	0	1090.53	High	0	0.002896	2.26
	High	TRLEQEIATYR		0.0100798	0	3	8	1	IPI00384444 IPI:IPI00384444.4; IPI00217963 IPI:IPI00217963.2; IPI00450768 IPI:IPI00450768.4	1	1379.73	High	0	0.006201	2.88
	High	TDLEMQIEGLK		0.00866118	0	1	4	1	IPI00217963 IPI:IPI00217963.2	0	1276.65	High	0	0.005268	2.11
	High	TKYEHELALR		0.0010534	0	1	1	1	IPI00217963 IPI:IPI00217963.2	1	1259.67	High	0	0.0005495	3.16
	High	TEELNKEVASNSELVQSSR		4.099e-09	0	1	1	1	IPI00217963 IPI:IPI00217963.2	1	2120.05	High	0	8.626e-10	6.37
	High	TDLEMQIEGLKEELAYLR	1xOxidation [M5]	3.43533e-05	0	1	1	2	IPI00217963 IPI:IPI00217963.2	1	2167.1	High	0	1.398e-05	2.91
	High	TDLEMQIEGLK	1xOxidation [M5]	0.0322611	0	1	4	1	IPI00217963 IPI:IPI00217963.2	0	1292.64	High	0	0.02162	2.27
	High	EQSSSSFSQGQSS		0.0326857	0	1	1	1	IPI00217963 IPI:IPI00217963.2	0	1345.55	High	0	0.02195	2.51
	High	EVFTSSSSSSSR		0.00478188	0	1	1	2	IPI00217963 IPI:IPI00217963.2	0	1260.57	High	0	0.002775	1.69
	High	EVASNSELVQSSR		6.7155e-06	0	1	1	2	IPI00217963 IPI:IPI00217963.2	0	1405.69	High	0	2.432e-06	4.11
	High	ALEEANADLEVK		2.78849e-06	0	3	7	2	IPI00384444 IPI:IPI00384444.4; sp; IPI00217963 IPI:IPI00217963.2	0	1301.66	High	0	9.475e-07	4.43
	High	APSTYGGGLSVSSR		8.46308e-06	0	1	1	2	IPI00217963 IPI:IPI00217963.2	0	1338.66	High	0	3.11e-06	2.85
	High	DAETWFLSK		0.0170727	0	1	1	2	IPI00217963 IPI:IPI00217963.2	0	1096.53	High	0	0.01092	2.47
	High	ASLENSLEETKGR		0.00096032	0	2	2	1	IPI00384444 IPI:IPI00384444.4; IPI00217963 IPI:IPI00217963.2	1	1433.72	High	0	0.0004984	3.96
	High	ASLENSLEETK		0.000114369	0	2	2	2	IPI00384444 IPI:IPI00384444.4; IPI00217963 IPI:IPI00217963.2	0	1220.6	High	0	5.09e-05	3.37
	High	LEQEIATYR		0.0198599	0	3	10	1	IPI00384444 IPI:IPI00384444.4; IPI00217963 IPI:IPI00217963.2; IPI00450768 IPI:IPI00450768.4	0	1122.58	High	0	0.01281	2.64
	High	LAADDFR		0.0346652	0	7	27	5	sp; IPI00384444 IPI:IPI00384444.4; IPI00383759 IPI:IPI00383759.1; sp; sp; IPI00217963 IPI:IPI00217963.2; IPI00450768 IPI:IPI00450768.4	0	807.4	High	0.002933	0.05342	1.97
	High	KNHEEEMLALR		0.00146579	0	1	1	1	IPI00217963 IPI:IPI00217963.2	1	1369.69	High	0	0.0007822	3.21
	High	LASYLDK		0.0248268	0	5	14	5	IPI00384444 IPI:IPI00384444.4; sp; IPI00217963 IPI:IPI00217963.2; IPI00450768 IPI:IPI00450768.4; IPI00019359 IPI:IPI00019359.2	0	809.44	High	0	0.01633	2.39
	High	GQTGGDVNVEMDAAPGVDLSR		0.011653	0	1	1	1	IPI00217963 IPI:IPI00217963.2	0	2087.97	High	0	0.007256	3.38
	High	GQTGGDVNVEMDAAPGVDLSR	1xOxidation [M11]	1.01162e-05	0	1	1	1	IPI00217963 IPI:IPI00217963.2	0	2103.96	High	0	3.769e-06	4.93
	High	GSCGIGGGIGGGSSR	1xCarbamidomethyl [C3]	1.76238e-05	0	2	2	2	IPI00384444 IPI:IPI00384444.4; IPI00217963 IPI:IPI00217963.2	0	1278.59	High	0	6.841e-06	3.19
	High	DYSPYFK		0.0582859	0.00120145	3	3	2	IPI00384444 IPI:IPI00384444.4; sp; IPI00217963 IPI:IPI00217963.2	0	919.42	High	0.0007987	0.0409	1.96
	High	SEVTELR		0.0489457	0.00120145	1	1	1	IPI00217963 IPI:IPI00217963.2	0	833.436	High	0.0007987	0.03395	1.85
	High	EELAYLR		0.0564348	0.00120145	1	1	1	IPI00217963 IPI:IPI00217963.2	0	893.473	High	0.0007987	0.03958	2.17
	High	LASYLDKVR		0.0637867	0.0022289	4	11	1	IPI00384444 IPI:IPI00384444.4; sp; IPI00217963 IPI:IPI00217963.2; IPI00450768 IPI:IPI00450768.4	1	1064.61	High	0.001487	0.04488	2.18
	High	RVLDELTLAR		0.0773047	0.004336	3	8	1	IPI00384444 IPI:IPI00384444.4; IPI00217963 IPI:IPI00217963.2; IPI00450768 IPI:IPI00450768.4	1	1185.69	High	0.003264	0.05547	2.68
	High	CEMEQQSQEYQILLDVK	1xCarbamidomethyl [C1]; 1xOxidation [M3]	0.101504	0.00835654	1	1	1	IPI00217963 IPI:IPI00217963.2	0	2156.98	High	0.005917	0.07426	2.05
High	Master Protein	sp	K22E_HUMAN	0	137.63	55	37	69	25	1	645	65.8	8	175.56	37
	Confidence	Sequence	Modifications	Qvality PEP	Qvality q-value	# Protein Groups	# Proteins	# PSMs	Master Protein Accessions	# Missed Cleavages	Theo. MH+ [Da]	Confidence (by Search Engine): Sequest HT	Percolator q-Value (by Search Engine): Sequest HT	Percolator PEP (by Search Engine): Sequest HT	XCorr (by Search Engine): Sequest HT
	High	NVQDAIADAEQR		7.39414e-05	0	1	1	2	sp	0	1329.64	High	0	0.0003221	3.52
	High	NLDLDSIIAEVK		0.000378239	0	4	9	4	IPI00300725 IPI:IPI00300725.6; sp; IPI00009867 IPI:IPI00009867.2; IPI00293665 IPI:IPI00293665.6	0	1329.73	High	0	0.002958	3.22
	High	NKLNDLEEALQQAK		0.0114248	0	1	1	1	sp	1	1613.85	High	0	0.007091	3.09
	High	RSTSSFSCLSR	1xCarbamidomethyl [C8]	0.00981744	0	1	1	1	sp	1	1287.61	High	0	0.006038	2.51
	High	LNDLEEALQQAK		0.000547622	0	1	1	2	sp	0	1371.71	High	0	0.0002726	2.83
	High	LLEGEECR	1xCarbamidomethyl [C7]	0.0178771	0	6	13	1	IPI00300725 IPI:IPI00300725.6; sp; IPI00009867 IPI:IPI00009867.2; IPI00166205 IPI:IPI00166205.2; IPI00329306 IPI:IPI00329306.2; IPI00293665 IPI:IPI00293665.6	0	1005.47	High	0	0.01144	1.98
	High	MSGDLSSNVTVSVTSSTISSNVASK	1xOxidation [M1]	3.86927e-05	0	1	1	1	sp	0	2474.19	High	0	1.585e-05	4.89
	High	LQGEIAHVK		0.0266833	0	1	1	2	sp	0	994.568	High	0	0.01759	2.28
	High	VDPEIQNVK		0.00805494	0	1	1	1	sp	0	1041.56	High	0	0.004853	2.34
	High	VDLLNQEIEFLK		0.00077729	0	1	1	2	sp	0	1460.8	High	0	0.001313	2.56
	High	YLDGLTAER		0.012365	0	1	1	1	sp	0	1037.53	High	0	0.007728	2.35
	High	YEELQVTVGR		0.000887113	0	1	1	2	sp	0	1193.62	High	0	0.0004573	3.07
	High	TSQNSELNNMQDLVEDYKK		3.30178e-05	0	1	1	2	sp	1	2256.04	High	0	1.336e-05	3.57
	High	STSSFSCLSR	1xCarbamidomethyl [C7]	0.0114248	0	1	1	1	sp	0	1131.51	High	0	0.007084	2.09
	High	SKEEAEALYHSK		2.61017e-06	0	1	1	3	sp	1	1391.68	High	0	8.78e-07	4.18
	High	SLVGLGGTK		0.0300215	0	1	1	1	sp	0	831.493	High	0	0.01999	2.09
	High	SISISVAGGGGGFGAAGGFGGR		0.00014413	0	1	1	1	sp	0	1838.91	High	0	6.502e-05	2.69
	High	TAAENDFVTLKK		8.78026e-05	0	1	1	2	sp	1	1336.71	High	0	0.0007991	3.04
	High	TAAENDFVTLK		7.39414e-05	0	1	1	1	sp	0	1208.62	High	0	3.175e-05	3.45
	High	TSQNSELNNMQDLVEDYKK	1xOxidation [M10]	2.42024e-05	0	1	1	2	sp	1	2272.04	High	0	9.621e-06	4.57
	High	DVDNAYMIK	1xOxidation [M7]	0.010838	0	1	1	2	sp	0	1084.5	High	0	0.006679	1.89
	High	DVDNAYMIK		0.0344396	0	1	1	1	sp	0	1068.5	High	0	0.02319	1.69
	High	EEAEALYHSK		0.0222061	0	1	1	1	sp	0	1176.55	High	0	0.0145	2.19
	High	DYQELMNVK		0.00374526	0	2	4	1	IPI00290857 IPI:IPI00290857.1; sp	0	1139.54	High	0	0.002137	3.03
	High	FLEQQNQVLQTK		6.43603e-05	0	3	4	6	sp; IPI00376379 IPI:IPI00376379.1; IPI00556624 IPI:IPI00556624.1	0	1475.79	High	0	2.749e-05	4.09
	High	AAFGGSGGR		0.0320509	0	1	1	1	sp	0	779.379	High	0	0.02142	1.94
	High	AQYEEIAQR		0.00369611	0	4	7	2	IPI00290078 IPI:IPI00290078.2; IPI00300725 IPI:IPI00300725.6; sp; IPI00293665 IPI:IPI00293665.6	0	1107.54	High	0	0.002118	2.6
	High	HGGGGGGFGGGGFGSR		0.000252756	0	1	1	2	sp	0	1320.58	High	0	0.0001189	2.91
	High	IEISELNR		0.0087185	0	2	3	2	sp; IPI00556624 IPI:IPI00556624.1	0	973.531	High	0	0.01008	2.63
	High	LALDVEIATYRK		0.0483149	0	5	11	1	IPI00290857 IPI:IPI00290857.1; IPI00300725 IPI:IPI00300725.6; sp; IPI00009867 IPI:IPI00009867.2; IPI00293665 IPI:IPI00293665.6	1	1391.79	High	0	0.03329	3.12
	High	LALDVEIATYR		0.000114369	0	5	11	3	IPI00290857 IPI:IPI00290857.1; IPI00300725 IPI:IPI00300725.6; sp; IPI00009867 IPI:IPI00009867.2; IPI00293665 IPI:IPI00293665.6	0	1263.69	High	0	5.059e-05	3.31
	High	KYEDEINKR		0.00419026	0	2	3	1	IPI00290857 IPI:IPI00290857.1; sp	2	1194.61	High	0	0.002422	3.48
	High	GGSISGGGYGSGGGK		0.000145086	0	1	1	2	sp	0	1197.55	High	0	6.542e-05	3.45
	High	GFSSGSAVVSGGSR		1.47438e-05	0	1	1	2	sp	0	1254.61	High	0	5.653e-06	3.92
	High	GGSSSGGGYGSGGGGSSSVK		0.0518847	0.00120145	1	1	1	sp	0	1588.68	High	0.0007987	0.03594	1.01
	High	YEDEINK		0.0505579	0.00120145	7	16	1	IPI00290857 IPI:IPI00290857.1; IPI00300725 IPI:IPI00300725.6; sp; IPI00009867 IPI:IPI00009867.2; IPI00293665 IPI:IPI00293665.6; IPI00376379 IPI:IPI00376379.1; IPI00556624 IPI:IPI00556624.1	0	910.415	High	0.0007987	0.03516	1.59
	High	FASFIDK		0.052902	0.00120145	9	22	3	IPI00290078 IPI:IPI00290078.2; IPI00290857 IPI:IPI00290857.1; IPI00300725 IPI:IPI00300725.6; IPI00556242 IPI:IPI00556242.1; sp; IPI00009867 IPI:IPI00009867.2; IPI00329306 IPI:IPI00329306.2; IPI00293665 IPI:IPI00293665.6; IPI00376379 IPI:IPI00376379.1	0	827.43	High	0.003546	0.05897	2.12
	High	MSGDLSSNVTVSVTSSTISSNVASK		0.0753556	0.00384064	1	1	1	sp	0	2458.2	High	0.002933	0.05392	2.45
	High	DYQELMNVK	1xOxidation [M6]	0.0793017	0.00476234	2	4	1	IPI00290857 IPI:IPI00290857.1; sp	0	1155.54	High	0.003546	0.05713	2.09
	High	YEDEINKR		0.0877901	0.00571894	7	15	1	IPI00290857 IPI:IPI00290857.1; IPI00300725 IPI:IPI00300725.6; sp; IPI00009867 IPI:IPI00009867.2; IPI00293665 IPI:IPI00293665.6; IPI00376379 IPI:IPI00376379.1; IPI00556624 IPI:IPI00556624.1	1	1066.52	High	0.004177	0.06359	1.76
	High	LQGEIAHVKK		0.10474	0.00835654	1	1	1	sp	1	1122.66	High	0.005917	0.0767	2.29
High	Master Protein	IPI00293665 IPI:IPI00293665.6	SWISS-PROT:P04259 REFSEQ_NP:NP_005546|ENSEMBL:ENSP00000252252 Tax_Id=9606 Keratin, type II cytoskeletal 6B	0	125.117	51	37	79	4	1	563	59.8	8	184.79	37
	Confidence	Sequence	Modifications	Qvality PEP	Qvality q-value	# Protein Groups	# Proteins	# PSMs	Master Protein Accessions	# Missed Cleavages	Theo. MH+ [Da]	Confidence (by Search Engine): Sequest HT	Percolator q-Value (by Search Engine): Sequest HT	Percolator PEP (by Search Engine): Sequest HT	XCorr (by Search Engine): Sequest HT
	High	NMQDLVEDLK	1xOxidation [M2]	0.003871	0	1	3	2	IPI00293665 IPI:IPI00293665.6	0	1220.58	High	0	0.002224	2.56
	High	NMQDLVEDLK		0.000819486	0	1	3	1	IPI00293665 IPI:IPI00293665.6	0	1204.59	High	0	0.0004193	3.13
	High	NTKQEIAEINR		0.0446936	0	2	5	1	IPI00300725 IPI:IPI00300725.6; IPI00293665 IPI:IPI00293665.6	1	1315.7	High	0	0.03073	2.65
	High	NLDLDSIIAEVK		0.000378239	0	4	9	4	IPI00300725 IPI:IPI00300725.6; sp; IPI00009867 IPI:IPI00009867.2; IPI00293665 IPI:IPI00293665.6	0	1329.73	High	0	0.002958	3.22
	High	NKYEDEINKR		0.00251975	0	4	10	4	IPI00300725 IPI:IPI00300725.6; IPI00009867 IPI:IPI00009867.2; IPI00293665 IPI:IPI00293665.6; IPI00556624 IPI:IPI00556624.1	2	1308.65	High	0	0.001403	3.68
	High	NKLEGLEDALQK		0.0249901	0	2	5	1	IPI00300725 IPI:IPI00300725.6; IPI00293665 IPI:IPI00293665.6	1	1357.73	High	0	0.01638	2.68
	High	QEIAEINR		0.00582934	0	2	5	2	IPI00300725 IPI:IPI00300725.6; IPI00293665 IPI:IPI00293665.6	0	972.511	High	0	0.003444	2.49
	High	RGFSASSAR		0.0473836	0	1	1	2	IPI00293665 IPI:IPI00293665.6	1	938.48	High	0.0007987	0.03586	2.52
	High	SEIDHVKK		0.0316345	0	2	5	1	IPI00300725 IPI:IPI00300725.6; IPI00293665 IPI:IPI00293665.6	1	955.521	High	0	0.02117	2.74
	High	QLDSIVGER		0.0037206	0	3	6	2	IPI00300725 IPI:IPI00300725.6; IPI00009867 IPI:IPI00009867.2; IPI00293665 IPI:IPI00293665.6	0	1016.54	High	0	0.002122	2.23
	High	QNLEPLFEQYINNLR		0.0298257	0	3	6	1	IPI00300725 IPI:IPI00300725.6; IPI00009867 IPI:IPI00009867.2; IPI00293665 IPI:IPI00293665.6	0	1890.97	High	0	0.01987	2.88
	High	SGFSSISVSR		0.00111058	0	1	3	4	IPI00293665 IPI:IPI00293665.6	0	1026.52	High	0	0.0005798	2.73
	High	LLKEYQELMNVK	1xOxidation [M9]	0.0042741	0	2	5	2	IPI00300725 IPI:IPI00300725.6; IPI00293665 IPI:IPI00293665.6	1	1523.81	High	0	0.002471	3.07
	High	LLEGEECR	1xCarbamidomethyl [C7]	0.0178771	0	6	13	1	IPI00300725 IPI:IPI00300725.6; sp; IPI00009867 IPI:IPI00009867.2; IPI00166205 IPI:IPI00166205.2; IPI00329306 IPI:IPI00329306.2; IPI00293665 IPI:IPI00293665.6	0	1005.47	High	0	0.01144	1.98
	High	LRSEIDHVKK		0.0251545	0	2	5	1	IPI00300725 IPI:IPI00300725.6; IPI00293665 IPI:IPI00293665.6	2	1224.71	High	0	0.01659	3.13
	High	ISIGGGSCAISGGYGSR	1xCarbamidomethyl [C8]	5.23441e-09	0	2	4	3	IPI00300725 IPI:IPI00300725.6; IPI00293665 IPI:IPI00293665.6	0	1598.76	High	0	1.125e-09	4.15
	High	YEELQVTAGR		0.00161851	0	2	6	3	IPI00300725 IPI:IPI00300725.6; IPI00293665 IPI:IPI00293665.6	0	1165.58	High	0	0.005574	2.68
	High	WTLLQEQGTK		0.000847014	0	3	6	2	IPI00300725 IPI:IPI00300725.6; IPI00009867 IPI:IPI00009867.2; IPI00293665 IPI:IPI00293665.6	0	1203.64	High	0	0.0004348	3.21
	High	SRAEAESWYQTK		0.000999159	0	2	6	1	IPI00300725 IPI:IPI00300725.6; IPI00293665 IPI:IPI00293665.6	1	1455.69	High	0	0.0005203	3.34
	High	TAAENEFVTLKK		0.00521047	0	2	5	1	IPI00300725 IPI:IPI00300725.6; IPI00293665 IPI:IPI00293665.6	1	1350.73	High	0	0.003052	2.51
	High	TAAENEFVTLK		5.41999e-05	0	2	5	1	IPI00300725 IPI:IPI00300725.6; IPI00293665 IPI:IPI00293665.6	0	1222.63	High	0	2.276e-05	3.18
	High	DVDAAYMNK	1xOxidation [M7]	0.00438851	0	3	8	5	IPI00300725 IPI:IPI00300725.6; IPI00009867 IPI:IPI00009867.2; IPI00293665 IPI:IPI00293665.6	0	1042.45	High	0	0.002543	2.61
	High	DVDAAYMNK		0.00172906	0	3	8	2	IPI00300725 IPI:IPI00300725.6; IPI00009867 IPI:IPI00009867.2; IPI00293665 IPI:IPI00293665.6	0	1026.46	High	0	0.0009335	2.47
	High	EYQELMNVK	1xOxidation [M6]	0.00183499	0	2	7	2	IPI00300725 IPI:IPI00300725.6; IPI00293665 IPI:IPI00293665.6	0	1169.55	High	0	0.0009992	3.04
	High	EYQELMNVK		0.00805494	0	2	7	1	IPI00300725 IPI:IPI00300725.6; IPI00293665 IPI:IPI00293665.6	0	1153.56	High	0	0.004862	2.51
	High	ADTLTDEINFLR		0.00789707	0	2	5	4	IPI00300725 IPI:IPI00300725.6; IPI00293665 IPI:IPI00293665.6	0	1407.71	High	0	0.02633	2.66
	High	AEAESWYQTK		0.00120222	0	2	6	2	IPI00300725 IPI:IPI00300725.6; IPI00293665 IPI:IPI00293665.6	0	1212.55	High	0	0.0006322	3.03
	High	ATGGGLSSVGGGSSTIK		1.28584e-08	0	1	1	2	IPI00293665 IPI:IPI00293665.6	0	1435.74	High	0	2.941e-09	5.15
	High	ASTSTTIR	1xAcetyl [N-Term]	0.0126952	0	2	4	2	IPI00300725 IPI:IPI00300725.6; IPI00293665 IPI:IPI00293665.6	0	878.458	High	0.004177	0.0637	2.08
	High	AQYEEIAQR		0.00369611	0	4	7	2	IPI00290078 IPI:IPI00290078.2; IPI00300725 IPI:IPI00300725.6; sp; IPI00293665 IPI:IPI00293665.6	0	1107.54	High	0	0.002118	2.6
	High	LEGLEDALQK		0.017995	0	2	5	1	IPI00300725 IPI:IPI00300725.6; IPI00293665 IPI:IPI00293665.6	0	1115.59	High	0	0.01154	1.93
	High	LALDVEIATYRK		0.0483149	0	5	11	1	IPI00290857 IPI:IPI00290857.1; IPI00300725 IPI:IPI00300725.6; sp; IPI00009867 IPI:IPI00009867.2; IPI00293665 IPI:IPI00293665.6	1	1391.79	High	0	0.03329	3.12
	High	LALDVEIATYR		0.000114369	0	5	11	3	IPI00290857 IPI:IPI00290857.1; IPI00300725 IPI:IPI00300725.6; sp; IPI00009867 IPI:IPI00009867.2; IPI00293665 IPI:IPI00293665.6	0	1263.69	High	0	5.059e-05	3.31
	High	KDVDAAYMNK	1xOxidation [M8]	0.00665201	0	3	8	1	IPI00300725 IPI:IPI00300725.6; IPI00009867 IPI:IPI00009867.2; IPI00293665 IPI:IPI00293665.6	1	1170.55	High	0	0.003953	2.8
	High	GSGGLGGACGGAGFGSR	1xCarbamidomethyl [C9]	0.000620881	0	2	4	3	IPI00300725 IPI:IPI00300725.6; IPI00293665 IPI:IPI00293665.6	0	1424.63	High	0	0.0003116	2.98
	High	SEIDHVK		0.0486293	0.000644996	2	5	2	IPI00300725 IPI:IPI00300725.6; IPI00293665 IPI:IPI00293665.6	0	827.426	High	0.0007987	0.03494	2.15
	High	YEDEINK		0.0505579	0.00120145	7	16	1	IPI00290857 IPI:IPI00290857.1; IPI00300725 IPI:IPI00300725.6; sp; IPI00009867 IPI:IPI00009867.2; IPI00293665 IPI:IPI00293665.6; IPI00376379 IPI:IPI00376379.1; IPI00556624 IPI:IPI00556624.1	0	910.415	High	0.0007987	0.03516	1.59
	High	FASFIDK		0.052902	0.00120145	9	22	3	IPI00290078 IPI:IPI00290078.2; IPI00290857 IPI:IPI00290857.1; IPI00300725 IPI:IPI00300725.6; IPI00556242 IPI:IPI00556242.1; sp; IPI00009867 IPI:IPI00009867.2; IPI00329306 IPI:IPI00329306.2; IPI00293665 IPI:IPI00293665.6; IPI00376379 IPI:IPI00376379.1	0	827.43	High	0.003546	0.05897	2.12
	High	YEDEINKR		0.0877901	0.00571894	7	15	1	IPI00290857 IPI:IPI00290857.1; IPI00300725 IPI:IPI00300725.6; sp; IPI00009867 IPI:IPI00009867.2; IPI00293665 IPI:IPI00293665.6; IPI00376379 IPI:IPI00376379.1; IPI00556624 IPI:IPI00556624.1	1	1066.52	High	0.004177	0.06359	1.76
	High	SLYGLGGSK		0.0965211	0.00757788	2	4	1	IPI00300725 IPI:IPI00300725.6; IPI00293665 IPI:IPI00293665.6	0	881.473	High	0.005416	0.07063	1.5
High	Master Protein	IPI00019359 IPI:IPI00019359.2	SWISS-PROT:P35527 REFSEQ_NP:NP_000217|ENSEMBL:ENSP00000246662 Tax_Id=9606 Keratin 9	0	122.962	52	28	74	27	1	623	62	5.24	157.9	28
	Confidence	Sequence	Modifications	Qvality PEP	Qvality q-value	# Protein Groups	# Proteins	# PSMs	Master Protein Accessions	# Missed Cleavages	Theo. MH+ [Da]	Confidence (by Search Engine): Sequest HT	Percolator q-Value (by Search Engine): Sequest HT	Percolator PEP (by Search Engine): Sequest HT	XCorr (by Search Engine): Sequest HT
	High	NHKEEMSQLTGQNSGDVNVEINVAPGK	1xOxidation [M6]	1.56192e-09	0	1	2	1	IPI00019359 IPI:IPI00019359.2	1	2911.39	High	0	3.076e-10	5.99
	High	NHKEEMSQLTGQNSGDVNVEINVAPGK		1.45918e-06	0	1	2	1	IPI00019359 IPI:IPI00019359.2	1	2895.39	High	0	4.714e-07	4.71
	High	SDLEMQYETLQEELMALKK	2xOxidation [M5; M15]	0.00394846	0	1	2	1	IPI00019359 IPI:IPI00019359.2	1	2331.11	High	0	0.00227	2.67
	High	QGVDADINGLR		2.93149e-05	0	1	2	1	IPI00019359 IPI:IPI00019359.2	0	1157.59	High	0	1.175e-05	3.63
	High	QFSSSYLSR		0.00416268	0	1	2	1	IPI00019359 IPI:IPI00019359.2	0	1074.52	High	0	0.002402	2.07
	High	QEYEQLIAK		0.00334748	0	1	2	1	IPI00019359 IPI:IPI00019359.2	0	1121.58	High	0	0.001904	2.91
	High	QVLDNLTMEK	1xOxidation [M8]	0.000681062	0	1	2	3	IPI00019359 IPI:IPI00019359.2	0	1206.6	High	0	0.008655	2.93
	High	QVLDNLTMEK		0.000331412	0	1	2	1	IPI00019359 IPI:IPI00019359.2	0	1190.61	High	0	0.000159	2.69
	High	IKFEMEQNLR		0.0214889	0	1	2	1	IPI00019359 IPI:IPI00019359.2	1	1307.68	High	0	0.01398	2.4
	High	IKFEMEQNLR	1xOxidation [M5]	0.00193459	0	1	2	4	IPI00019359 IPI:IPI00019359.2	1	1323.67	High	0	0.001885	3.51
	High	IQDWYDKK		0.0427051	0	1	2	1	IPI00019359 IPI:IPI00019359.2	1	1095.55	High	0	0.02914	2.58
	High	VQALEEANNDLENK		7.56377e-06	0	1	2	2	IPI00019359 IPI:IPI00019359.2	0	1586.77	High	0	2.754e-06	3.94
	High	STMQELNSR	1xOxidation [M3]	0.00145614	0	1	2	7	IPI00019359 IPI:IPI00019359.2	0	1081.49	High	0	0.003375	2.89
	High	SGGGGGGGLGSGGSIR		6.38216e-09	0	1	2	4	IPI00019359 IPI:IPI00019359.2	0	1232.6	High	0	1.395e-09	6
	High	TLNDMRQEYEQLIAK	1xOxidation [M5]	0.00121019	0	1	2	1	IPI00019359 IPI:IPI00019359.2	1	1867.92	High	0	0.0006358	2.9
	High	TLLDIDNTR		0.00181091	0	1	2	1	IPI00019359 IPI:IPI00019359.2	0	1060.56	High	0	0.0009802	2.66
	High	EIETYHNLLEGGQEDFESSGAGK		6.25688e-09	0	1	2	2	IPI00019359 IPI:IPI00019359.2	0	2510.13	High	0	1.363e-09	7.43
	High	DQIVDLTVGNNK		0.00538534	0	1	2	1	IPI00019359 IPI:IPI00019359.2	0	1315.69	High	0	0.003151	2.55
	High	FSSSSGYGGGSSR		2.23573e-05	0	1	2	4	IPI00019359 IPI:IPI00019359.2	0	1235.53	High	0	8.811e-06	3.35
	High	FSSSGGGGGGGR		0.000718034	0	1	1	6	IPI00019359 IPI:IPI00019359.2	0	982.434	High	0	0.001921	1.85
	High	FEMEQNLR	1xOxidation [M3]	0.0128636	0	1	2	1	IPI00019359 IPI:IPI00019359.2	0	1082.49	High	0	0.00806	2.29
	High	FEMEQNLR		0.039754	0	1	2	1	IPI00019359 IPI:IPI00019359.2	0	1066.5	High	0	0.02705	2.19
	High	HGVQELEIELQSQLSK		5.65534e-06	0	1	2	4	IPI00019359 IPI:IPI00019359.2	0	1837.97	High	0	2.016e-06	5.36
	High	HGVQELEIELQSQLSKK		0.00287566	0	1	2	1	IPI00019359 IPI:IPI00019359.2	1	1966.06	High	0	0.001616	2.75
	High	LASYLDK		0.0248268	0	5	14	5	IPI00384444 IPI:IPI00384444.4; sp; IPI00217963 IPI:IPI00217963.2; IPI00450768 IPI:IPI00450768.4; IPI00019359 IPI:IPI00019359.2	0	809.44	High	0	0.01633	2.39
	High	GGSGGSHGGGSGFGGESGGSYGGGEEASGSGGGYGGGSGK		0.000306146	0	1	2	1	IPI00019359 IPI:IPI00019359.2	0	3223.28	High	0	0.0001458	2.9
	High	GGSGGSYGGGGSGGGYGGGSGSR		0.00665201	0	1	2	3	IPI00019359 IPI:IPI00019359.2	0	1791.73	High	0	0.003959	2.12
	High	GPAAIQK		0.0512171	0.00120145	1	2	2	IPI00019359 IPI:IPI00019359.2	0	684.404	High	0.00222	0.0524	2.28
	High	MTLDDFR	1xOxidation [M1]	0.0508865	0.00120145	1	2	6	IPI00019359 IPI:IPI00019359.2	0	913.408	High	0.007582	0.09083	2.22
	High	IQDWYDK		0.0715973	0.0022289	1	2	1	IPI00019359 IPI:IPI00019359.2	0	967.452	High	0.001487	0.05108	1.76
	High	SLEDTK		0.0706862	0.0022289	1	2	2	IPI00019359 IPI:IPI00019359.2	0	692.346	High	0.001487	0.05026	1.4
	High	STMQELNSR		0.0684566	0.0022289	1	2	1	IPI00019359 IPI:IPI00019359.2	0	1065.5	High	0.001487	0.04844	1.35
	High	MTLDDFR		0.0641983	0.0022289	1	2	1	IPI00019359 IPI:IPI00019359.2	0	897.413	High	0.001487	0.04537	1.53
	High	KGPAAIQK		0.0855908	0.00522949	1	2	1	IPI00019359 IPI:IPI00019359.2	1	812.499	High	0.003855	0.0618	2.36
High	Master Protein	IPI00300725 IPI:IPI00300725.6	SWISS-PROT:P02538 TREMBL:Q6UBJ0|REFSEQ_NP:NP_005545|H-INV:HIT000033986;HIT000036548 Tax_Id=9606 Keratin, type II cytoskeletal 6A	0	119.673	51	37	75	4	1	563	59.9	8	171.38	37
	Confidence	Sequence	Modifications	Qvality PEP	Qvality q-value	# Protein Groups	# Proteins	# PSMs	Master Protein Accessions	# Missed Cleavages	Theo. MH+ [Da]	Confidence (by Search Engine): Sequest HT	Percolator q-Value (by Search Engine): Sequest HT	Percolator PEP (by Search Engine): Sequest HT	XCorr (by Search Engine): Sequest HT
	High	NTKQEIAEINR		0.0446936	0	2	5	1	IPI00300725 IPI:IPI00300725.6; IPI00293665 IPI:IPI00293665.6	1	1315.7	High	0	0.03073	2.65
	High	NLDLDSIIAEVK		0.000378239	0	4	9	4	IPI00300725 IPI:IPI00300725.6; sp; IPI00009867 IPI:IPI00009867.2; IPI00293665 IPI:IPI00293665.6	0	1329.73	High	0	0.002958	3.22
	High	NKYEDEINKR		0.00251975	0	4	10	4	IPI00300725 IPI:IPI00300725.6; IPI00009867 IPI:IPI00009867.2; IPI00293665 IPI:IPI00293665.6; IPI00556624 IPI:IPI00556624.1	2	1308.65	High	0	0.001403	3.68
	High	NKLEGLEDALQK		0.0249901	0	2	5	1	IPI00300725 IPI:IPI00300725.6; IPI00293665 IPI:IPI00293665.6	1	1357.73	High	0	0.01638	2.68
	High	QEIAEINR		0.00582934	0	2	5	2	IPI00300725 IPI:IPI00300725.6; IPI00293665 IPI:IPI00293665.6	0	972.511	High	0	0.003444	2.49
	High	SEIDHVKK		0.0316345	0	2	5	1	IPI00300725 IPI:IPI00300725.6; IPI00293665 IPI:IPI00293665.6	1	955.521	High	0	0.02117	2.74
	High	QLDSIVGER		0.0037206	0	3	6	2	IPI00300725 IPI:IPI00300725.6; IPI00009867 IPI:IPI00009867.2; IPI00293665 IPI:IPI00293665.6	0	1016.54	High	0	0.002122	2.23
	High	QNLEPLFEQYINNLR		0.0298257	0	3	6	1	IPI00300725 IPI:IPI00300725.6; IPI00009867 IPI:IPI00009867.2; IPI00293665 IPI:IPI00293665.6	0	1890.97	High	0	0.01987	2.88
	High	LLKEYQELMNVK	1xOxidation [M9]	0.0042741	0	2	5	2	IPI00300725 IPI:IPI00300725.6; IPI00293665 IPI:IPI00293665.6	1	1523.81	High	0	0.002471	3.07
	High	LLEGEECR	1xCarbamidomethyl [C7]	0.0178771	0	6	13	1	IPI00300725 IPI:IPI00300725.6; sp; IPI00009867 IPI:IPI00009867.2; IPI00166205 IPI:IPI00166205.2; IPI00329306 IPI:IPI00329306.2; IPI00293665 IPI:IPI00293665.6	0	1005.47	High	0	0.01144	1.98
	High	LRSEIDHVKK		0.0251545	0	2	5	1	IPI00300725 IPI:IPI00300725.6; IPI00293665 IPI:IPI00293665.6	2	1224.71	High	0	0.01659	3.13
	High	ISIGGGSCAISGGYGSR	1xCarbamidomethyl [C8]	5.23441e-09	0	2	4	3	IPI00300725 IPI:IPI00300725.6; IPI00293665 IPI:IPI00293665.6	0	1598.76	High	0	1.125e-09	4.15
	High	SGFSSVSVSR		0.00225207	0	1	1	3	IPI00300725 IPI:IPI00300725.6	0	1012.51	High	0	0.001241	2.85
	High	YEELQVTAGR		0.00161851	0	2	6	3	IPI00300725 IPI:IPI00300725.6; IPI00293665 IPI:IPI00293665.6	0	1165.58	High	0	0.005574	2.68
	High	WTLLQEQGTK		0.000847014	0	3	6	2	IPI00300725 IPI:IPI00300725.6; IPI00009867 IPI:IPI00009867.2; IPI00293665 IPI:IPI00293665.6	0	1203.64	High	0	0.0004348	3.21
	High	SRAEAESWYQTK		0.000999159	0	2	6	1	IPI00300725 IPI:IPI00300725.6; IPI00293665 IPI:IPI00293665.6	1	1455.69	High	0	0.0005203	3.34
	High	TAAENEFVTLKK		0.00521047	0	2	5	1	IPI00300725 IPI:IPI00300725.6; IPI00293665 IPI:IPI00293665.6	1	1350.73	High	0	0.003052	2.51
	High	TAAENEFVTLK		5.41999e-05	0	2	5	1	IPI00300725 IPI:IPI00300725.6; IPI00293665 IPI:IPI00293665.6	0	1222.63	High	0	2.276e-05	3.18
	High	DVDAAYMNK	1xOxidation [M7]	0.00438851	0	3	8	5	IPI00300725 IPI:IPI00300725.6; IPI00009867 IPI:IPI00009867.2; IPI00293665 IPI:IPI00293665.6	0	1042.45	High	0	0.002543	2.61
	High	DVDAAYMNK		0.00172906	0	3	8	2	IPI00300725 IPI:IPI00300725.6; IPI00009867 IPI:IPI00009867.2; IPI00293665 IPI:IPI00293665.6	0	1026.46	High	0	0.0009335	2.47
	High	EYQELMNVK	1xOxidation [M6]	0.00183499	0	2	7	2	IPI00300725 IPI:IPI00300725.6; IPI00293665 IPI:IPI00293665.6	0	1169.55	High	0	0.0009992	3.04
	High	EYQELMNVK		0.00805494	0	2	7	1	IPI00300725 IPI:IPI00300725.6; IPI00293665 IPI:IPI00293665.6	0	1153.56	High	0	0.004862	2.51
	High	AIGGGLSSVGGGSSTIK		4.02577e-05	0	1	4	1	IPI00300725 IPI:IPI00300725.6	0	1447.78	High	0	1.655e-05	3.81
	High	ADTLTDEINFLR		0.00789707	0	2	5	4	IPI00300725 IPI:IPI00300725.6; IPI00293665 IPI:IPI00293665.6	0	1407.71	High	0	0.02633	2.66
	High	AEAESWYQTK		0.00120222	0	2	6	2	IPI00300725 IPI:IPI00300725.6; IPI00293665 IPI:IPI00293665.6	0	1212.55	High	0	0.0006322	3.03
	High	ASTSTTIR	1xAcetyl [N-Term]	0.0126952	0	2	4	2	IPI00300725 IPI:IPI00300725.6; IPI00293665 IPI:IPI00293665.6	0	878.458	High	0.004177	0.0637	2.08
	High	AQYEEIAQR		0.00369611	0	4	7	2	IPI00290078 IPI:IPI00290078.2; IPI00300725 IPI:IPI00300725.6; sp; IPI00293665 IPI:IPI00293665.6	0	1107.54	High	0	0.002118	2.6
	High	LEGLEDALQK		0.017995	0	2	5	1	IPI00300725 IPI:IPI00300725.6; IPI00293665 IPI:IPI00293665.6	0	1115.59	High	0	0.01154	1.93
	High	LALDVEIATYRK		0.0483149	0	5	11	1	IPI00290857 IPI:IPI00290857.1; IPI00300725 IPI:IPI00300725.6; sp; IPI00009867 IPI:IPI00009867.2; IPI00293665 IPI:IPI00293665.6	1	1391.79	High	0	0.03329	3.12
	High	LALDVEIATYR		0.000114369	0	5	11	3	IPI00290857 IPI:IPI00290857.1; IPI00300725 IPI:IPI00300725.6; sp; IPI00009867 IPI:IPI00009867.2; IPI00293665 IPI:IPI00293665.6	0	1263.69	High	0	5.059e-05	3.31
	High	KDVDAAYMNK	1xOxidation [M8]	0.00665201	0	3	8	1	IPI00300725 IPI:IPI00300725.6; IPI00009867 IPI:IPI00009867.2; IPI00293665 IPI:IPI00293665.6	1	1170.55	High	0	0.003953	2.8
	High	GMQDLVEDFK	1xOxidation [M2]	0.00301175	0	1	2	1	IPI00300725 IPI:IPI00300725.6	0	1197.55	High	0	0.00169	2.8
	High	GSGGLGGACGGAGFGSR	1xCarbamidomethyl [C9]	0.000620881	0	2	4	3	IPI00300725 IPI:IPI00300725.6; IPI00293665 IPI:IPI00293665.6	0	1424.63	High	0	0.0003116	2.98
	High	GFSANSAR		0.0185965	0	1	3	1	IPI00300725 IPI:IPI00300725.6	0	809.39	High	0	0.01197	1.64
	High	GMQDLVEDFK		0.00225207	0	1	2	1	IPI00300725 IPI:IPI00300725.6	0	1181.55	High	0	0.001244	2.83
	High	SEIDHVK		0.0486293	0.000644996	2	5	2	IPI00300725 IPI:IPI00300725.6; IPI00293665 IPI:IPI00293665.6	0	827.426	High	0.0007987	0.03494	2.15
	High	YEDEINK		0.0505579	0.00120145	7	16	1	IPI00290857 IPI:IPI00290857.1; IPI00300725 IPI:IPI00300725.6; sp; IPI00009867 IPI:IPI00009867.2; IPI00293665 IPI:IPI00293665.6; IPI00376379 IPI:IPI00376379.1; IPI00556624 IPI:IPI00556624.1	0	910.415	High	0.0007987	0.03516	1.59
	High	FASFIDK		0.052902	0.00120145	9	22	3	IPI00290078 IPI:IPI00290078.2; IPI00290857 IPI:IPI00290857.1; IPI00300725 IPI:IPI00300725.6; IPI00556242 IPI:IPI00556242.1; sp; IPI00009867 IPI:IPI00009867.2; IPI00329306 IPI:IPI00329306.2; IPI00293665 IPI:IPI00293665.6; IPI00376379 IPI:IPI00376379.1	0	827.43	High	0.003546	0.05897	2.12
	High	YEDEINKR		0.0877901	0.00571894	7	15	1	IPI00290857 IPI:IPI00290857.1; IPI00300725 IPI:IPI00300725.6; sp; IPI00009867 IPI:IPI00009867.2; IPI00293665 IPI:IPI00293665.6; IPI00376379 IPI:IPI00376379.1; IPI00556624 IPI:IPI00556624.1	1	1066.52	High	0.004177	0.06359	1.76
	High	SLYGLGGSK		0.0965211	0.00757788	2	4	1	IPI00300725 IPI:IPI00300725.6; IPI00293665 IPI:IPI00293665.6	0	881.473	High	0.005416	0.07063	1.5
High	Master Protein	IPI00384444 IPI:IPI00384444.4	SWISS-PROT:P02533 TREMBL:Q9UBN2;Q13092;Q53XY3;Q9UBN3|REFSEQ_NP:NP_000517|ENSEMBL:ENSP00000167586|H-INV:HIT000031101;HIT000038549 Tax_Id=9606 Keratin, type I cytoskeletal 14	0	114.844	60	32	76	10	1	471	51.5	5.16	181.87	32
	Confidence	Sequence	Modifications	Qvality PEP	Qvality q-value	# Protein Groups	# Proteins	# PSMs	Master Protein Accessions	# Missed Cleavages	Theo. MH+ [Da]	Confidence (by Search Engine): Sequest HT	Percolator q-Value (by Search Engine): Sequest HT	Percolator PEP (by Search Engine): Sequest HT	XCorr (by Search Engine): Sequest HT
	High	NHEEEMNALR	1xOxidation [M6]	0.00981744	0	2	2	1	IPI00384444 IPI:IPI00384444.4; IPI00450768 IPI:IPI00450768.4	0	1258.55	High	0	0.006023	2.28
	High	QFTSSSSMK	1xOxidation [M8]	0.00142756	0	2	2	4	IPI00384444 IPI:IPI00384444.4; IPI00217963 IPI:IPI00217963.2	0	1018.45	High	0	0.0007615	2.85
	High	MSVEADINGLR	1xOxidation [M1]	0.00582934	0	1	4	1	IPI00384444 IPI:IPI00384444.4	0	1220.59	High	0	0.003451	3.23
	High	ILTATVDNANVLLQIDNAR		0.000458135	0	1	1	1	IPI00384444 IPI:IPI00384444.4	0	2054.12	High	0	0.0002251	4.45
	High	MSVEADINGLR		0.00521047	0	1	4	1	IPI00384444 IPI:IPI00384444.4	0	1204.6	High	0	0.003052	2.59
	High	ISSVLAGGSCR	1xCarbamidomethyl [C10]	7.4153e-06	0	2	2	2	IPI00384444 IPI:IPI00384444.4; IPI00217963 IPI:IPI00217963.2	0	1106.56	High	0	2.689e-06	3.11
	High	VLDELTLAR		0.00118644	0	3	8	2	IPI00384444 IPI:IPI00384444.4; IPI00217963 IPI:IPI00217963.2; IPI00450768 IPI:IPI00450768.4	0	1029.59	High	0	0.0006243	3.1
	High	VTMQNLNDR	1xOxidation [M3]	0.00189662	0	4	8	17	IPI00384444 IPI:IPI00384444.4; IPI00328103 IPI:IPI00328103.1; sp; IPI00217963 IPI:IPI00217963.2	0	1106.53	High	0	0.002274	2.78
	High	VTMQNLNDR		0.00497513	0	4	8	1	IPI00384444 IPI:IPI00384444.4; IPI00328103 IPI:IPI00328103.1; sp; IPI00217963 IPI:IPI00217963.2	0	1090.53	High	0	0.002896	2.26
	High	VVSTHEQVLR		0.000863973	0	1	1	1	IPI00384444 IPI:IPI00384444.4	0	1167.65	High	0	0.0004432	2.45
	High	TMQNLEIELQSQLSMK	1xOxidation [M15]	0.00146579	0	1	1	1	IPI00384444 IPI:IPI00384444.4	0	1908.94	High	0	0.0007825	3.24
	High	TMQNLEIELQSQLSMK	2xOxidation [M2; M15]	4.96933e-07	0	1	1	2	IPI00384444 IPI:IPI00384444.4	0	1924.94	High	0	1.482e-07	4.25
	High	TRLEQEIATYR		0.0100798	0	3	8	1	IPI00384444 IPI:IPI00384444.4; IPI00217963 IPI:IPI00217963.2; IPI00450768 IPI:IPI00450768.4	1	1379.73	High	0	0.006201	2.88
	High	EVATNSELVQSGK		2.55164e-05	0	2	2	2	IPI00384444 IPI:IPI00384444.4; IPI00450768 IPI:IPI00450768.4	0	1361.69	High	0	1.019e-05	3.76
	High	ALEEANADLEVK		2.78849e-06	0	3	7	2	IPI00384444 IPI:IPI00384444.4; sp; IPI00217963 IPI:IPI00217963.2	0	1301.66	High	0	9.475e-07	4.43
	High	ADLEMQIESLKEELAYLK	1xOxidation [M5]	0.0227969	0	1	1	2	IPI00384444 IPI:IPI00384444.4	1	2139.09	High	0	0.01491	2.27
	High	ADLEMQIESLK	1xOxidation [M5]	0.00392247	0	1	1	1	IPI00384444 IPI:IPI00384444.4	0	1292.64	High	0	0.002249	2.18
	High	APSTYGGGLSVSSSR		0.00283791	0	1	1	3	IPI00384444 IPI:IPI00384444.4	0	1425.7	High	0	0.001587	2.58
	High	CEMEQQNQEYK	1xCarbamidomethyl [C1]; 1xOxidation [M3]	0.000547622	0	2	2	2	IPI00384444 IPI:IPI00384444.4; IPI00450768 IPI:IPI00450768.4	0	1502.59	High	0	0.0002713	2.53
	High	CEMEQQNQEYK	1xCarbamidomethyl [C1]	5.00678e-05	0	2	2	1	IPI00384444 IPI:IPI00384444.4; IPI00450768 IPI:IPI00450768.4	0	1486.59	High	0	2.091e-05	3.24
	High	DAEEWFFTK		0.0029139	0	1	1	2	IPI00384444 IPI:IPI00384444.4	0	1172.53	High	0	0.00164	2.57
	High	ASLENSLEETKGR		0.00096032	0	2	2	1	IPI00384444 IPI:IPI00384444.4; IPI00217963 IPI:IPI00217963.2	1	1433.72	High	0	0.0004984	3.96
	High	ASLENSLEETK		0.000114369	0	2	2	2	IPI00384444 IPI:IPI00384444.4; IPI00217963 IPI:IPI00217963.2	0	1220.6	High	0	5.09e-05	3.37
	High	LEQEIATYR		0.0198599	0	3	10	1	IPI00384444 IPI:IPI00384444.4; IPI00217963 IPI:IPI00217963.2; IPI00450768 IPI:IPI00450768.4	0	1122.58	High	0	0.01281	2.64
	High	LAADDFR		0.0346652	0	7	27	5	sp; IPI00384444 IPI:IPI00384444.4; IPI00383759 IPI:IPI00383759.1; sp; sp; IPI00217963 IPI:IPI00217963.2; IPI00450768 IPI:IPI00450768.4	0	807.4	High	0.002933	0.05342	1.97
	High	KNHEEEMNALR	1xOxidation [M7]	0.000385812	0	2	2	1	IPI00384444 IPI:IPI00384444.4; IPI00450768 IPI:IPI00450768.4	1	1386.64	High	0	0.0001868	4.15
	High	KDAEEWFFTK		0.00178713	0	1	1	1	IPI00384444 IPI:IPI00384444.4	1	1300.62	High	0	0.0009657	2.6
	High	LASYLDK		0.0248268	0	5	14	5	IPI00384444 IPI:IPI00384444.4; sp; IPI00217963 IPI:IPI00217963.2; IPI00450768 IPI:IPI00450768.4; IPI00019359 IPI:IPI00019359.2	0	809.44	High	0	0.01633	2.39
	High	GSCGIGGGIGGGSSR	1xCarbamidomethyl [C3]	1.76238e-05	0	2	2	2	IPI00384444 IPI:IPI00384444.4; IPI00217963 IPI:IPI00217963.2	0	1278.59	High	0	6.841e-06	3.19
	High	GQVGGDVNVEMDAAPGVDLSR	1xOxidation [M11]	0.000841435	0	1	1	1	IPI00384444 IPI:IPI00384444.4	0	2101.98	High	0	0.0004318	3.56
	High	DYSPYFK		0.0582859	0.00120145	3	3	2	IPI00384444 IPI:IPI00384444.4; sp; IPI00217963 IPI:IPI00217963.2	0	919.42	High	0.0007987	0.0409	1.96
	High	EELAYLK		0.053591	0.00120145	2	6	1	IPI00384444 IPI:IPI00384444.4; IPI00450768 IPI:IPI00450768.4	0	865.467	High	0.0007987	0.03731	2.44
	High	SEISELR		0.0629713	0.0022289	2	2	1	IPI00384444 IPI:IPI00384444.4; IPI00450768 IPI:IPI00450768.4	0	833.436	High	0.001487	0.04433	2.18
	High	LASYLDKVR		0.0637867	0.0022289	4	11	1	IPI00384444 IPI:IPI00384444.4; sp; IPI00217963 IPI:IPI00217963.2; IPI00450768 IPI:IPI00450768.4	1	1064.61	High	0.001487	0.04488	2.18
	High	RVLDELTLAR		0.0773047	0.004336	3	8	1	IPI00384444 IPI:IPI00384444.4; IPI00217963 IPI:IPI00217963.2; IPI00450768 IPI:IPI00450768.4	1	1185.69	High	0.003264	0.05547	2.68
	High	TEELNR		0.102787	0.00835654	2	4	1	IPI00384444 IPI:IPI00384444.4; IPI00450768 IPI:IPI00450768.4	0	761.379	High	0.005917	0.07564	1.53
High	Master Protein	YLR197W	NOP56 SGDID:S000004187, Chr XII from 546097-547611, Genome Release 64-2-1, Verified ORF, "Essential evolutionarily-conserved nucleolar protein; component of the box C/D snoRNP complexes that direct 2'-O-methylation of pre-rRNA during its maturation; overexpression causes spindle orientation defects"	0	110.838	62	26	40	25	1	504	56.8	8.9	113.68	26
	Confidence	Sequence	Modifications	Qvality PEP	Qvality q-value	# Protein Groups	# Proteins	# PSMs	Master Protein Accessions	# Missed Cleavages	Theo. MH+ [Da]	Confidence (by Search Engine): Sequest HT	Percolator q-Value (by Search Engine): Sequest HT	Percolator PEP (by Search Engine): Sequest HT	XCorr (by Search Engine): Sequest HT
	High	QAASTVQILGAEK		2.68008e-06	0	1	1	3	YLR197W	0	1315.72	High	0	9.075e-07	4.45
	High	NELAIQEAMELYNK	1xOxidation [M9]	4.65155e-07	0	1	1	3	YLR197W	0	1681.81	High	0	1.381e-07	4.87
	High	NELAIQEAMELYNK		0.00311288	0	1	1	2	YLR197W	0	1665.82	High	0	0.001752	2.44
	High	NDNHIIQAIALLDQLDK		0.00138117	0	1	1	1	YLR197W	0	1934.03	High	0	0.0007337	4.17
	High	LISHAGSLTNLSK		0.000470407	0	1	1	2	YLR197W	0	1340.75	High	0	0.0002313	3.16
	High	LIELVSFAPFK		0.000214266	0	1	1	2	YLR197W	0	1263.73	High	0	9.935e-05	3.36
	High	LKEVQEQINDFGAFTK		3.01001e-05	0	1	1	1	YLR197W	1	1866.96	High	0	1.21e-05	5.31
	High	LVPDNYTFAK		0.00724791	0	1	1	1	YLR197W	0	1167.6	High	0	0.004359	2.06
	High	MHTVAPNLSELIGEVIGAR	1xOxidation [M1]	0.0408033	0	1	1	1	YLR197W	0	2023.06	High	0	0.02782	2.99
	High	ISMGQDISETDMENVCVFAQR	1xCarbamidomethyl [C16]; 2xOxidation [M3; M12]	0.0120434	0	1	1	1	YLR197W	0	2462.06	High	0	0.007494	2.47
	High	VKEWYGWHFPELAK		0.0337712	0	1	1	1	YLR197W	1	1789.91	High	0	0.02275	2.64
	High	VASLADYR		0.00975292	0	1	1	1	YLR197W	0	894.468	High	0	0.00596	2.26
	High	YGLIYHSGFISK		0.00146579	0	1	1	1	YLR197W	0	1384.73	High	0	0.0007839	2.62
	High	GAAEALENANDISEGLVSESLK		8.21142e-07	0	1	1	1	YLR197W	0	2217.09	High	0	2.539e-07	5.16
	High	EVQEQINDFGAFTK		6.87572e-05	0	1	1	2	YLR197W	0	1625.78	High	0	2.945e-05	3.36
	High	EWYGWHFPELAK		0.0018594	0	2	2	2	YOR310C; YLR197W	0	1562.74	High	0	0.001013	2.66
	High	AILDLNLPK		0.0405384	0	1	1	1	YLR197W	0	996.609	High	0	0.02768	1.72
	High	DKPAAEVEETKEK		0.00647869	0	1	1	1	YLR197W	1	1473.74	High	0	0.003858	2.57
	High	DKPAAEVEETK		0.00182291	0	1	1	1	YLR197W	0	1216.61	High	0	0.0009862	3.6
	High	DKASLNDDSLHDLAALLNEDSGIAQR		0.00542102	0	1	1	1	YLR197W	1	2781.36	High	0	0.003175	2.91
	High	AQLGLGHAYSR		0.000235035	0	1	1	2	YLR197W	0	1172.62	High	0	0.0001096	3.07
	High	IDNYSEEPSNVFGSVLK		0.00154536	0	1	1	3	YLR197W	0	1897.92	High	0	0.0008272	3.48
	High	LEFYNTGKPTLK		2.76222e-05	0	1	1	2	YLR197W	0	1410.76	High	0	1.106e-05	3.67
	High	KNITLAISDK		0.00283791	0	1	1	1	YLR197W	1	1102.65	High	0	0.001596	2.51
	High	KLEDDDEEK		0.00332544	0	1	1	1	YLR197W	1	1120.5	High	0	0.001881	3.08
	High	LQQDDIGSR		0.0575385	0.00120145	1	1	1	YLR197W	0	1031.51	High	0.0007987	0.04023	1.77
	High	NLGPSIK		0.0823893	0.00476234	1	1	1	YLR197W	0	728.43	High	0.003546	0.05926	1.68
High	Master Protein	sp	K1C10_HUMAN	0	97.108	49	29	78	21	1	593	59.5	5.21	178.9	29
	Confidence	Sequence	Modifications	Qvality PEP	Qvality q-value	# Protein Groups	# Proteins	# PSMs	Master Protein Accessions	# Missed Cleavages	Theo. MH+ [Da]	Confidence (by Search Engine): Sequest HT	Percolator q-Value (by Search Engine): Sequest HT	Percolator PEP (by Search Engine): Sequest HT	XCorr (by Search Engine): Sequest HT
	High	NQILNLTTDNANILLQIDNAR		0.00114788	0	1	3	1	sp	0	2367.26	High	0	0.0006002	3.85
	High	NVQALEIELQSQLALK		8.43893e-05	0	1	3	2	sp	0	1797.01	High	0	0.0009377	4.03
	High	RVLDELTLTK		0.0192179	0	2	3	2	sp; sp	1	1187.7	High	0	0.01235	3.08
	High	RNVQALEIELQSQLALK		0.021773	0	1	3	1	sp	1	1953.11	High	0	0.01414	3.89
	High	SEITELR		0.0379812	0	1	3	2	sp	0	847.452	High	0	0.02861	2.02
	High	QSVEADINGLR		0.00205311	0	2	6	2	sp; sp	0	1201.62	High	0	0.001122	2.98
	High	QSLEASLAETEGR		3.05878e-06	0	1	3	5	sp	0	1390.68	High	0	1.042e-06	4.19
	High	LKYENEVALR		0.0077423	0	1	3	1	sp	1	1234.68	High	0	0.004679	2.93
	High	VLDELTLTK		0.00475041	0	2	3	2	sp; sp	0	1031.6	High	0	0.002769	2.51
	High	VTMQNLNDR	1xOxidation [M3]	0.00189662	0	4	8	17	IPI00384444 IPI:IPI00384444.4; IPI00328103 IPI:IPI00328103.1; sp; IPI00217963 IPI:IPI00217963.2	0	1106.53	High	0	0.002274	2.78
	High	VTMQNLNDR		0.00497513	0	4	8	1	IPI00384444 IPI:IPI00384444.4; IPI00328103 IPI:IPI00328103.1; sp; IPI00217963 IPI:IPI00217963.2	0	1090.53	High	0	0.002896	2.26
	High	SQYEQLAEQNRK		0.0283038	0	1	2	1	sp	1	1493.73	High	0	0.01871	2.56
	High	SQYEQLAEQNR		0.000368372	0	1	2	3	sp	0	1365.64	High	0	0.0001783	3.08
	High	SGGGGGGGGCGGGGGVSSLR	1xCarbamidomethyl [C10]	0.000446184	0	1	2	1	sp	0	1549.68	High	0	0.0002188	2.76
	High	SLLEGEGSSGGGGR		4.44128e-07	0	1	3	2	sp	0	1262.6	High	0	1.313e-07	2.48
	High	ELTTEIDNNIEQISSYK		0.000847014	0	1	3	3	sp	0	1996.97	High	0	0.0004335	2.61
	High	ALEESNYELEGK		1.42646e-05	0	1	3	3	sp	0	1381.65	High	0	5.423e-06	3.39
	High	ADLEMQIESLTEELAYLKK	1xOxidation [M5]	0.00494238	0	1	2	1	sp	1	2240.14	High	0	0.002875	3.02
	High	ADLEMQIESLTEELAYLK	1xOxidation [M5]	0.000727587	0	1	2	3	sp	0	2112.04	High	0	0.0003702	2.99
	High	AETECQNTEYQQLLDIK	1xCarbamidomethyl [C5]	0.00350588	0	1	2	1	sp	0	2082.96	High	0	0.001998	2.56
	High	DAEAWFNEK		0.00630988	0	2	5	3	IPI00328103 IPI:IPI00328103.1; sp	0	1109.49	High	0	0.003748	2.72
	High	LENEIQTYR		0.00187173	0	1	3	2	sp	0	1165.58	High	0	0.001181	3.15
	High	GSLGGGFSSGGFSGGSFSR		0.00167287	0	1	3	3	sp	0	1707.77	High	0	0.001651	2.34
	High	LAADDFR		0.0346652	0	7	27	5	sp; IPI00384444 IPI:IPI00384444.4; IPI00383759 IPI:IPI00383759.1; sp; sp; IPI00217963 IPI:IPI00217963.2; IPI00450768 IPI:IPI00450768.4	0	807.4	High	0.002933	0.05342	1.97
	High	KDAEAWFNEK		0.0015763	0	1	3	2	sp	1	1237.58	High	0.007346	0.08854	2.81
	High	LASYLDK		0.0248268	0	5	14	5	IPI00384444 IPI:IPI00384444.4; sp; IPI00217963 IPI:IPI00217963.2; IPI00450768 IPI:IPI00450768.4; IPI00019359 IPI:IPI00019359.2	0	809.44	High	0	0.01633	2.39
	High	YENEVALR		0.0542886	0.00120145	1	3	1	sp	0	993.5	High	0.0007987	0.03772	2.45
	High	NVSTGDVNVEMNAAPGVDLTQLLNNMR	1xOxidation [M11]	0.0617669	0.0022289	1	3	1	sp	0	2888.39	High	0.001487	0.04359	1.9
	High	LASYLDKVR		0.0637867	0.0022289	4	11	1	IPI00384444 IPI:IPI00384444.4; sp; IPI00217963 IPI:IPI00217963.2; IPI00450768 IPI:IPI00450768.4	1	1064.61	High	0.001487	0.04488	2.18
	High	IRLENEIQTYR		0.0834437	0.00476234	1	3	1	sp	1	1434.77	High	0.003546	0.06025	3.22
High	Master Protein	YBR118W	TEF2 SGDID:S000000322, Chr II from 477671-479047, Genome Release 64-2-1, Verified ORF, "Translational elongation factor EF-1 alpha; also encoded by TEF1; functions in the binding reaction of aminoacyl-tRNA (AA-tRNA) to ribosomes; TEF2-RFP levels increase during replicative aging; may also have a role in tRNA re-export from the nucleus; TEF2 has a paralog, TEF1, that arose from the whole genome du…	0	95.015	43	17	40	17	1	458	50	9.04	108.15	17
	Confidence	Sequence	Modifications	Qvality PEP	Qvality q-value	# Protein Groups	# Proteins	# PSMs	Master Protein Accessions	# Missed Cleavages	Theo. MH+ [Da]	Confidence (by Search Engine): Sequest HT	Percolator q-Value (by Search Engine): Sequest HT	Percolator PEP (by Search Engine): Sequest HT	XCorr (by Search Engine): Sequest HT
	High	SGDAALVK		0.00800197	0	1	1	2	YBR118W	0	760.42	High	0	0.004828	2.77
	High	QLIVAVNK		0.00949902	0	1	1	1	YBR118W	0	884.556	High	0	0.005823	2.83
	High	IGGIGTVPVGR		0.000279094	0	1	1	2	YBR118W	0	1025.61	High	0	0.0001326	3.23
	High	LPLQDVYK		0.00956187	0	1	1	3	YBR118W	0	975.551	High	0	0.01753	2.51
	High	VETGVIKPGMVVTFAPAGVTTEVK	1xOxidation [M10]	2.84432e-06	0	1	1	2	YBR118W	0	2446.33	High	0	9.627e-07	5.35
	High	VETGVIKPGMVVTFAPAGVTTEVK		0.00131874	0	1	1	1	YBR118W	0	2430.33	High	0	0.0006969	3.71
	High	YQVTVIDAPGHR		0.000592815	0	1	1	3	YBR118W	0	1355.71	High	0	0.0003608	3.24
	High	SHINVVVIGHVDSGK		1.06959e-06	0	1	1	4	YBR118W	0	1560.85	High	0	3.392e-07	5.26
	High	SVEMHHEQLEQGVPGDNVGFNVK		3.01862e-06	0	1	1	2	YBR118W	0	2550.2	High	0	1.027e-06	3.99
	High	SVEMHHEQLEQGVPGDNVGFNVK	1xOxidation [M4]	5.11243e-10	0	1	1	2	YBR118W	0	2566.2	High	0	9.298e-11	5.39
	High	TLLEAIDAIEQPSRPTDKPLR		0.000808727	0	1	1	4	YBR118W	0	2363.29	High	0	0.0005379	3.44
	High	EHALLAFTLGVR		0.0387312	0	1	1	1	YBR118W	0	1326.75	High	0	0.02633	3.28
	High	FVPSKPMCVEAFSEYPPLGR	1xCarbamidomethyl [C8]; 1xOxidation [M7]	4.15353e-09	0	1	1	1	YBR118W	0	2327.12	High	0	8.756e-10	4.15
	High	FVPSKPMCVEAFSEYPPLGR	1xCarbamidomethyl [C8]	0.00289472	0	1	1	1	YBR118W	0	2311.12	High	0	0.00162	2.41
	High	FDELLEK		0.0410698	0	1	1	3	YBR118W	0	893.461	High	0.001487	0.04215	2.77
	High	KVGYNPK		0.0499069	0.00120145	1	1	1	YBR118W	1	805.457	High	0.0007987	0.03455	2.18
	High	YAWVLDK		0.0549951	0.00120145	1	1	3	YBR118W	0	894.472	High	0.0007987	0.03832	1.95
	High	ETSNFIK		0.0693402	0.0022289	1	1	2	YBR118W	0	838.431	High	0.001487	0.04934	2.14
	High	QTVAVGVIK		0.0680188	0.0022289	1	1	1	YBR118W	0	914.567	High	0.001487	0.04834	2.02
	High	VGYNPK		0.106727	0.00835654	1	1	1	YBR118W	0	677.362	High	0.005917	0.07845	1.45
High	Master Protein	IPI00009867 IPI:IPI00009867.2	SWISS-PROT:P13647 TREMBL:Q6PI71|REFSEQ_NP:NP_000415|ENSEMBL:ENSP00000252242|H-INV:HIT000039811 Tax_Id=9606 Keratin, type II cytoskeletal 5	0	94.58	45	32	63	19	1	590	62.4	8.06	144.19	32
	Confidence	Sequence	Modifications	Qvality PEP	Qvality q-value	# Protein Groups	# Proteins	# PSMs	Master Protein Accessions	# Missed Cleavages	Theo. MH+ [Da]	Confidence (by Search Engine): Sequest HT	Percolator q-Value (by Search Engine): Sequest HT	Percolator PEP (by Search Engine): Sequest HT	XCorr (by Search Engine): Sequest HT
	High	NMQDLVEDFK	1xOxidation [M2]	0.00283791	0	1	1	2	IPI00009867 IPI:IPI00009867.2	0	1254.57	High	0	0.001593	2.77
	High	NMQDLVEDFK		0.0107668	0	1	1	1	IPI00009867 IPI:IPI00009867.2	0	1238.57	High	0	0.006643	2.2
	High	NLDLDSIIAEVK		0.000378239	0	4	9	4	IPI00300725 IPI:IPI00300725.6; sp; IPI00009867 IPI:IPI00009867.2; IPI00293665 IPI:IPI00293665.6	0	1329.73	High	0	0.002958	3.22
	High	NKYEDEINKR		0.00251975	0	4	10	4	IPI00300725 IPI:IPI00300725.6; IPI00009867 IPI:IPI00009867.2; IPI00293665 IPI:IPI00293665.6; IPI00556624 IPI:IPI00556624.1	2	1308.65	High	0	0.001403	3.68
	High	SFSTASAITPSVSR		0.000171149	0	1	1	1	IPI00009867 IPI:IPI00009867.2	0	1410.72	High	0	7.814e-05	3.73
	High	QLDSIVGER		0.0037206	0	3	6	2	IPI00300725 IPI:IPI00300725.6; IPI00009867 IPI:IPI00009867.2; IPI00293665 IPI:IPI00293665.6	0	1016.54	High	0	0.002122	2.23
	High	QNLEPLFEQYINNLR		0.0298257	0	3	6	1	IPI00300725 IPI:IPI00300725.6; IPI00009867 IPI:IPI00009867.2; IPI00293665 IPI:IPI00293665.6	0	1890.97	High	0	0.01987	2.88
	High	LLEGEECR	1xCarbamidomethyl [C7]	0.0178771	0	6	13	1	IPI00300725 IPI:IPI00300725.6; sp; IPI00009867 IPI:IPI00009867.2; IPI00166205 IPI:IPI00166205.2; IPI00329306 IPI:IPI00329306.2; IPI00293665 IPI:IPI00293665.6	0	1005.47	High	0	0.01144	1.98
	High	LRAEIDNVKK		0.0408033	0	1	1	1	IPI00009867 IPI:IPI00009867.2	2	1185.69	High	0	0.02785	2.86
	High	SGGGGGGGFGR		5.07339e-05	0	1	1	3	IPI00009867 IPI:IPI00009867.2	0	865.391	High	0	3.573e-05	3.46
	High	TTAENEFVMLK	1xOxidation [M9]	0.00208042	0	1	1	2	IPI00009867 IPI:IPI00009867.2	0	1298.63	High	0	0.003107	2.47
	High	TTAENEFVMLK		0.000782443	0	1	1	2	IPI00009867 IPI:IPI00009867.2	0	1282.63	High	0	0.0004001	2.55
	High	VDALMDEINFMK	2xOxidation [M5; M11]	8.21878e-05	0	1	1	2	IPI00009867 IPI:IPI00009867.2	0	1457.67	High	0	3.569e-05	3.64
	High	VDALMDEINFMK	1xOxidation [M]	0.0329	0	1	1	2	IPI00009867 IPI:IPI00009867.2	0	1441.67	High	0	0.02294	2.05
	High	YEELQQTAGR		0.0152658	0	1	1	1	IPI00009867 IPI:IPI00009867.2	0	1194.57	High	0	0.009688	2.33
	High	VSLAGACGVGGYGSR	1xCarbamidomethyl [C7]	6.28606e-06	0	1	1	1	IPI00009867 IPI:IPI00009867.2	0	1410.68	High	0	2.255e-06	3.94
	High	WTLLQEQGTK		0.000847014	0	3	6	2	IPI00300725 IPI:IPI00300725.6; IPI00009867 IPI:IPI00009867.2; IPI00293665 IPI:IPI00293665.6	0	1203.64	High	0	0.0004348	3.21
	High	SLYNLGGSK		0.0387312	0	1	1	2	IPI00009867 IPI:IPI00009867.2	0	938.494	High	0.001487	0.0454	1.8
	High	TSFTSVSR		0.0176435	0	1	1	1	IPI00009867 IPI:IPI00009867.2	0	884.447	High	0	0.01128	2.06
	High	DVDAAYMNK	1xOxidation [M7]	0.00438851	0	3	8	5	IPI00300725 IPI:IPI00300725.6; IPI00009867 IPI:IPI00009867.2; IPI00293665 IPI:IPI00293665.6	0	1042.45	High	0	0.002543	2.61
	High	DVDAAYMNK		0.00172906	0	3	8	2	IPI00300725 IPI:IPI00300725.6; IPI00009867 IPI:IPI00009867.2; IPI00293665 IPI:IPI00293665.6	0	1026.46	High	0	0.0009335	2.47
	High	EYQELMNTK	1xOxidation [M6]	0.000637511	0	1	1	2	IPI00009867 IPI:IPI00009867.2	0	1171.53	High	0	0.000321	3.02
	High	AEIDNVKK		0.0351209	0	1	1	1	IPI00009867 IPI:IPI00009867.2	1	916.51	High	0	0.02366	2.14
	High	AQYEEIANR		0.00313351	0	1	1	1	IPI00009867 IPI:IPI00009867.2	0	1093.53	High	0	0.001767	2.66
	High	LALDVEIATYRK		0.0483149	0	5	11	1	IPI00290857 IPI:IPI00290857.1; IPI00300725 IPI:IPI00300725.6; sp; IPI00009867 IPI:IPI00009867.2; IPI00293665 IPI:IPI00293665.6	1	1391.79	High	0	0.03329	3.12
	High	LALDVEIATYR		0.000114369	0	5	11	3	IPI00290857 IPI:IPI00290857.1; IPI00300725 IPI:IPI00300725.6; sp; IPI00009867 IPI:IPI00009867.2; IPI00293665 IPI:IPI00293665.6	0	1263.69	High	0	5.059e-05	3.31
	High	LAELEEALQK		0.00379506	0	1	1	2	IPI00009867 IPI:IPI00009867.2	0	1143.63	High	0	0.005647	2.94
	High	KDVDAAYMNK	1xOxidation [M8]	0.00665201	0	3	8	1	IPI00300725 IPI:IPI00300725.6; IPI00009867 IPI:IPI00009867.2; IPI00293665 IPI:IPI00293665.6	1	1170.55	High	0	0.003953	2.8
	High	GLGVGFGSGGGSSSSVK		0.0286769	0	1	1	1	IPI00009867 IPI:IPI00009867.2	0	1439.71	High	0	0.01899	1.71
	High	YEDEINK		0.0505579	0.00120145	7	16	1	IPI00290857 IPI:IPI00290857.1; IPI00300725 IPI:IPI00300725.6; sp; IPI00009867 IPI:IPI00009867.2; IPI00293665 IPI:IPI00293665.6; IPI00376379 IPI:IPI00376379.1; IPI00556624 IPI:IPI00556624.1	0	910.415	High	0.0007987	0.03516	1.59
	High	HEISEMNR	1xOxidation [M6]	0.0512171	0.00120145	1	1	1	IPI00009867 IPI:IPI00009867.2	0	1031.46	High	0.0007987	0.0356	1.61
	High	FASFIDK		0.052902	0.00120145	9	22	3	IPI00290078 IPI:IPI00290078.2; IPI00290857 IPI:IPI00290857.1; IPI00300725 IPI:IPI00300725.6; IPI00556242 IPI:IPI00556242.1; sp; IPI00009867 IPI:IPI00009867.2; IPI00329306 IPI:IPI00329306.2; IPI00293665 IPI:IPI00293665.6; IPI00376379 IPI:IPI00376379.1	0	827.43	High	0.003546	0.05897	2.12
	High	QSSVSFR		0.068897	0.0022289	1	1	1	IPI00009867 IPI:IPI00009867.2	0	810.41	High	0.001487	0.04892	2.05
	High	TTAENEFVMLKK	1xOxidation [M9]	0.0748757	0.00384064	1	1	1	IPI00009867 IPI:IPI00009867.2	1	1426.72	High	0.002933	0.05339	2.16
	High	YEDEINKR		0.0877901	0.00571894	7	15	1	IPI00290857 IPI:IPI00290857.1; IPI00300725 IPI:IPI00300725.6; sp; IPI00009867 IPI:IPI00009867.2; IPI00293665 IPI:IPI00293665.6; IPI00376379 IPI:IPI00376379.1; IPI00556624 IPI:IPI00556624.1	1	1066.52	High	0.004177	0.06359	1.76
	High	LRAEIDNVK		0.0947122	0.00719071	1	1	1	IPI00009867 IPI:IPI00009867.2	1	1057.6	High	0.005165	0.06891	2.94
High	Master Protein	IPI00450768 IPI:IPI00450768.4	SWISS-PROT:Q04695 TREMBL:Q6IP98;Q14666|REFSEQ_NP:NP_000413|ENSEMBL:ENSP00000319235|H-INV:HIT000035527 Tax_Id=9606 Keratin, type I cytoskeletal 17	0	88.495	62	29	49	15	1	431	47.9	5.02	113.04	29
	Confidence	Sequence	Modifications	Qvality PEP	Qvality q-value	# Protein Groups	# Proteins	# PSMs	Master Protein Accessions	# Missed Cleavages	Theo. MH+ [Da]	Confidence (by Search Engine): Sequest HT	Percolator q-Value (by Search Engine): Sequest HT	Percolator PEP (by Search Engine): Sequest HT	XCorr (by Search Engine): Sequest HT
	High	NHEEEMNALR	1xOxidation [M6]	0.00981744	0	2	2	1	IPI00384444 IPI:IPI00384444.4; IPI00450768 IPI:IPI00450768.4	0	1258.55	High	0	0.006023	2.28
	High	RLLEGEDAHLTQYK		0.030417	0	1	1	1	IPI00450768 IPI:IPI00450768.4	1	1672.87	High	0	0.02025	1.96
	High	QFTSSSSIK		0.00303171	0	1	1	2	IPI00450768 IPI:IPI00450768.4	0	984.5	High	0	0.001711	2.36
	High	ILTATVDNANILLQIDNAR		0.000338048	0	1	1	1	IPI00450768 IPI:IPI00450768.4	0	2068.14	High	0	0.0001619	3.76
	High	LLEGEDAHLTQYK		0.0073442	0	1	1	1	IPI00450768 IPI:IPI00450768.4	0	1516.76	High	0	0.004422	2.24
	High	LSVEADINGLR		5.82865e-05	0	1	1	1	IPI00450768 IPI:IPI00450768.4	0	1186.64	High	0	2.463e-05	3.86
	High	LSGGLGAGSCR	1xCarbamidomethyl [C10]	0.0182333	0	1	2	1	IPI00450768 IPI:IPI00450768.4	0	1034.5	High	0	0.01169	2.47
	High	VLDELTLAR		0.00118644	0	3	8	2	IPI00384444 IPI:IPI00384444.4; IPI00217963 IPI:IPI00217963.2; IPI00450768 IPI:IPI00450768.4	0	1029.59	High	0	0.0006243	3.1
	High	YCVQLSQIQGLIGSVEEQLAQLR	1xCarbamidomethyl [C2]	0.00215029	0	1	1	1	IPI00450768 IPI:IPI00450768.4	0	2632.38	High	0	0.001182	2.9
	High	TMQALEIELQSQLSMK	2xOxidation [M2; M15]	2.13466e-05	0	1	1	2	IPI00450768 IPI:IPI00450768.4	0	1881.93	High	0	8.4e-06	4.34
	High	TMQALEIELQSQLSMK	1xOxidation [M15]	0.0133822	0	1	1	1	IPI00450768 IPI:IPI00450768.4	0	1865.93	High	0	0.008381	3.36
	High	TIVEEVQDGK		0.000624998	0	1	1	3	IPI00450768 IPI:IPI00450768.4	0	1117.57	High	0	0.0003146	2.79
	High	TIEELQNK		0.0152658	0	1	2	1	IPI00450768 IPI:IPI00450768.4	0	974.515	High	0	0.009675	1.99
	High	TRLEQEIATYR		0.0100798	0	3	8	1	IPI00384444 IPI:IPI00384444.4; IPI00217963 IPI:IPI00217963.2; IPI00450768 IPI:IPI00450768.4	1	1379.73	High	0	0.006201	2.88
	High	EVATNSELVQSGK		2.55164e-05	0	2	2	2	IPI00384444 IPI:IPI00384444.4; IPI00450768 IPI:IPI00450768.4	0	1361.69	High	0	1.019e-05	3.76
	High	ALEEANTELEVK		0.000186502	0	1	2	1	IPI00450768 IPI:IPI00450768.4	0	1345.68	High	0	8.594e-05	3.4
	High	ADLEMQIENLK	1xOxidation [M5]	0.0312234	0	1	2	1	IPI00450768 IPI:IPI00450768.4	0	1319.65	High	0	0.02083	1.52
	High	ADLEMQIENLK		0.0024703	0	1	2	1	IPI00450768 IPI:IPI00450768.4	0	1303.66	High	0	0.001372	2.75
	High	DAEDWFFSK		0.00468808	0	1	1	1	IPI00450768 IPI:IPI00450768.4	0	1144.49	High	0	0.002719	2.13
	High	CEMEQQNQEYK	1xCarbamidomethyl [C1]; 1xOxidation [M3]	0.000547622	0	2	2	2	IPI00384444 IPI:IPI00384444.4; IPI00450768 IPI:IPI00450768.4	0	1502.59	High	0	0.0002713	2.53
	High	CEMEQQNQEYK	1xCarbamidomethyl [C1]	5.00678e-05	0	2	2	1	IPI00384444 IPI:IPI00384444.4; IPI00450768 IPI:IPI00450768.4	0	1486.59	High	0	2.091e-05	3.24
	High	ASLEGNLAETENR		0.00297222	0	1	1	1	IPI00450768 IPI:IPI00450768.4	0	1403.68	High	0	0.001676	2.54
	High	ATMQNLNDR	1xOxidation [M3]	0.00408102	0	1	3	3	IPI00450768 IPI:IPI00450768.4	0	1078.49	High	0	0.005602	2.7
	High	LEQEIATYR		0.0198599	0	3	10	1	IPI00384444 IPI:IPI00384444.4; IPI00217963 IPI:IPI00217963.2; IPI00450768 IPI:IPI00450768.4	0	1122.58	High	0	0.01281	2.64
	High	LAADDFR		0.0346652	0	7	27	5	sp; IPI00384444 IPI:IPI00384444.4; IPI00383759 IPI:IPI00383759.1; sp; sp; IPI00217963 IPI:IPI00217963.2; IPI00450768 IPI:IPI00450768.4	0	807.4	High	0.002933	0.05342	1.97
	High	KNHEEEMNALR	1xOxidation [M7]	0.000385812	0	2	2	1	IPI00384444 IPI:IPI00384444.4; IPI00450768 IPI:IPI00450768.4	1	1386.64	High	0	0.0001868	4.15
	High	LASYLDK		0.0248268	0	5	14	5	IPI00384444 IPI:IPI00384444.4; sp; IPI00217963 IPI:IPI00217963.2; IPI00450768 IPI:IPI00450768.4; IPI00019359 IPI:IPI00019359.2	0	809.44	High	0	0.01633	2.39
	High	EELAYLK		0.053591	0.00120145	2	6	1	IPI00384444 IPI:IPI00384444.4; IPI00450768 IPI:IPI00450768.4	0	865.467	High	0.0007987	0.03731	2.44
	High	SEISELR		0.0629713	0.0022289	2	2	1	IPI00384444 IPI:IPI00384444.4; IPI00450768 IPI:IPI00450768.4	0	833.436	High	0.001487	0.04433	2.18
	High	LASYLDKVR		0.0637867	0.0022289	4	11	1	IPI00384444 IPI:IPI00384444.4; sp; IPI00217963 IPI:IPI00217963.2; IPI00450768 IPI:IPI00450768.4	1	1064.61	High	0.001487	0.04488	2.18
	High	RVLDELTLAR		0.0773047	0.004336	3	8	1	IPI00384444 IPI:IPI00384444.4; IPI00217963 IPI:IPI00217963.2; IPI00450768 IPI:IPI00450768.4	1	1185.69	High	0.003264	0.05547	2.68
	High	TEELNR		0.102787	0.00835654	2	4	1	IPI00384444 IPI:IPI00384444.4; IPI00450768 IPI:IPI00450768.4	0	761.379	High	0.005917	0.07564	1.53
High	Master Protein	YOR310C	NOP58 SGDID:S000005837, Chr XV from 898360-896825, Genome Release 64-2-1, reverse complement, Verified ORF, "Protein involved in producing mature rRNAs and snoRNAs; involved in pre-rRNA processing, 18S rRNA synthesis, and snoRNA synthesis; component of the small subunit processome complex, which is required for processing of pre-18S rRNA"	0	70.97	43	19	27	18	1	511	56.9	8.94	65.78	19
	Confidence	Sequence	Modifications	Qvality PEP	Qvality q-value	# Protein Groups	# Proteins	# PSMs	Master Protein Accessions	# Missed Cleavages	Theo. MH+ [Da]	Confidence (by Search Engine): Sequest HT	Percolator q-Value (by Search Engine): Sequest HT	Percolator PEP (by Search Engine): Sequest HT	XCorr (by Search Engine): Sequest HT
	High	MSLGLAHSIGR	1xOxidation [M1]	0.000637511	0	1	1	1	YOR310C	0	1157.61	High	0	0.00032	2.76
	High	MSLGLAHSIGR		0.0196006	0	1	1	1	YOR310C	0	1141.61	High	0	0.01266	2.35
	High	IVTDSVAYAR		0.0112012	0	1	1	1	YOR310C	0	1094.58	High	0	0.006951	2.3
	High	YGLLYHASLVGQATGK		1.02324e-09	0	1	1	2	YOR310C	0	1677.9	High	0	1.958e-10	5.4
	High	YDALAEDRDDSGDIGLESR		0.00263901	0	1	1	1	YOR310C	1	2096.94	High	0	0.001472	2.84
	High	STLIVSETK		0.00196032	0	1	1	2	YOR310C	0	977.551	High	0	0.001071	2.43
	High	SSSLIQDLDSSDK		0.00419026	0	1	1	1	YOR310C	0	1394.66	High	0	0.002409	2.41
	High	SPASTIQILGAEK		9.75949e-05	0	1	1	2	YOR310C	0	1314.73	High	0	4.295e-05	3.09
	High	EQLSNYLSAR		0.00552946	0	1	1	1	YOR310C	0	1180.6	High	0	0.003249	2.29
	High	FNSAANALEEANSIIEGK		3.74351e-05	0	1	1	2	YOR310C	0	1877.92	High	0	1.528e-05	4
	High	EWYGWHFPELAK		0.0018594	0	2	2	2	YOR310C; YLR197W	0	1562.74	High	0	0.001013	2.66
	High	EYLPELLPGMSDNDLSK	1xOxidation [M10]	0.0127791	0	1	1	1	YOR310C	0	1936.92	High	0	0.007994	2.41
	High	AIAPNLTQLVGELVGAR		1.49399e-05	0	1	1	1	YOR310C	0	1721.99	High	0	5.725e-06	4.94
	High	DDSGDIGLESR		4.62507e-05	0	1	1	1	YOR310C	0	1163.52	High	0	1.925e-05	2.75
	High	AYNADADTAK		0.0030518	0	1	1	1	YOR310C	0	1039.47	High	0	0.001718	1.96
	High	KSTLIVSETK		0.00389665	0	1	1	1	YOR310C	1	1105.65	High	0	0.002234	2.41
	High	LIAHSGSLISLAK		0.0486293	0.000644996	1	1	1	YOR310C	0	1309.78	High	0.0007987	0.03368	1.26
	High	ASETDLSEILPEEIEER		0.0582859	0.00120145	1	1	2	YOR310C	0	1959.94	High	0.0007987	0.04076	2.06
	High	VSSQLEK		0.0590427	0.00120145	1	1	1	YOR310C	0	790.431	High	0.0007987	0.04134	2.23
	High	IILTMGIR		0.0889097	0.00571894	1	1	1	YOR310C	0	916.565	High	0.004177	0.0644	2.36
	High	IILTMGIR	1xOxidation [M5]	0.100869	0.00807394	1	1	1	YOR310C	0	932.56	High	0.005741	0.07367	2.1
High	Master Protein	sp	ALBU_HUMAN	0	69.438	49	30	34	30	1	609	69.3	6.28	65.51	30
	Confidence	Sequence	Modifications	Qvality PEP	Qvality q-value	# Protein Groups	# Proteins	# PSMs	Master Protein Accessions	# Missed Cleavages	Theo. MH+ [Da]	Confidence (by Search Engine): Sequest HT	Percolator q-Value (by Search Engine): Sequest HT	Percolator PEP (by Search Engine): Sequest HT	XCorr (by Search Engine): Sequest HT
	High	AACLLPK	1xCarbamidomethyl [C3]	0.0365235	0	1	1	1	sp	0	772.439	High	0	0.02466	2.1
	High	NECFLQHK	1xCarbamidomethyl [C3]	0.00925171	0	1	1	1	sp	0	1075.5	High	0	0.005636	2.04
	High	RHPYFYAPELLFFAK		0.00968881	0	1	1	1	sp	1	1899	High	0	0.005946	2.79
	High	RHPDYSVVLLLR		0.00459613	0	1	1	1	sp	1	1467.84	High	0	0.002667	3.39
	High	QTALVELVK		0.0166293	0	1	1	1	sp	0	1000.6	High	0	0.01064	2.04
	High	QNCELFEQLGEYK	1xCarbamidomethyl [C3]	0.000347102	0	1	1	1	sp	0	1657.75	High	0	0.0001672	2.28
	High	LKECCEKPLLEK	2xCarbamidomethyl [C4; C5]	0.000428839	0	1	1	2	sp	1	1546.8	High	0	0.0002099	3.37
	High	VHTECCHGDLLECADDR	3xCarbamidomethyl [C5; C6; C13]	0.000166684	0	1	1	1	sp	0	2086.84	High	0	7.578e-05	3.48
	High	VFDEFKPLVEEPQNLIK		0.00199957	0	1	1	1	sp	0	2045.1	High	0	0.001094	2.85
	High	VPQVSTPTLVEVSR		0.0183536	0	1	2	1	sp	0	1511.84	High	0	0.01175	2.09
	High	SLHTLFGDK		0.0142932	0	1	1	1	sp	0	1017.54	High	0	0.009029	2.32
	High	FQNALLVR		0.0427051	0	1	1	1	sp	0	960.563	High	0	0.02917	1.41
	High	FKDLGEENFK		0.0032818	0	1	1	2	sp	1	1226.61	High	0	0.02796	2.45
	High	ADDKETCFAEEGKK	1xCarbamidomethyl [C7]	0.0166293	0	1	1	1	sp	2	1627.73	High	0	0.01062	2.54
	High	ADDKETCFAEEGK	1xCarbamidomethyl [C7]	0.003871	0	1	1	1	sp	1	1499.63	High	0	0.002217	2.83
	High	AAFTECCQAADK	2xCarbamidomethyl [C6; C7]	0.00197332	0	1	1	1	sp	0	1371.57	High	0	0.00108	1.83
	High	AEFAEVSK		0.0237125	0	1	1	1	sp	0	880.441	High	0	0.01549	2.1
	High	CCTESLVNR	2xCarbamidomethyl [C1; C2]	0.00402747	0	1	2	2	sp	0	1138.5	High	0	0.002308	2.26
	High	CCAAADPHECYAK	3xCarbamidomethyl [C1; C2; C10]	5.4921e-05	0	1	1	1	sp	0	1552.6	High	0	2.305e-05	2.2
	High	DDNPNLPR		0.0339926	0	1	1	2	sp	0	940.448	High	0	0.02291	1.66
	High	AVMDDFAAFVEK	1xOxidation [M3]	0.031842	0	1	1	1	sp	0	1358.63	High	0	0.02124	2.25
	High	ETYGEMADCCAK	2xCarbamidomethyl [C9; C10]	0.0308176	0	1	1	1	sp	0	1434.53	High	0	0.02058	1.07
	High	LDELRDEGK		0.00937455	0	1	1	1	sp	1	1074.54	High	0	0.005739	2.33
	High	KQTALVELVK		0.0193446	0	1	1	1	sp	1	1128.7	High	0	0.01244	2.59
	High	ECCEKPLLEK	2xCarbamidomethyl [C2; C3]	0.0525608	0.00120145	1	1	1	sp	0	1305.62	High	0.0007987	0.03657	1.6
	High	LVTDLTK		0.0575385	0.00120145	1	2	1	sp	0	789.472	High	0.0007987	0.04036	1.71
	High	RPCFSALEVDETYVPK	1xCarbamidomethyl [C3]	0.0725198	0.0022289	1	1	1	sp	0	1910.93	High	0.001487	0.05167	1.97
	High	TYETTLEK		0.0911893	0.00669635	1	1	1	sp	0	984.488	High	0.004826	0.06604	1.65
	High	YLYEIAR		0.092935	0.00669635	1	2	1	sp	0	927.493	High	0.004826	0.06743	1.95
	High	LVAASQAALGL		0.0947122	0.00719071	1	1	1	sp	0	1013.6	High	0.005165	0.06878	2.69
High	Master Protein	YGR159C	NSR1 SGDID:S000003391, Chr VII from 807656-806412, Genome Release 64-2-1, reverse complement, Verified ORF, "Nucleolar protein that binds nuclear localization sequences; required for pre-rRNA processing and ribosome biogenesis"	0	68.712	46	18	22	18	1	414	44.5	4.93	58.67	18
	Confidence	Sequence	Modifications	Qvality PEP	Qvality q-value	# Protein Groups	# Proteins	# PSMs	Master Protein Accessions	# Missed Cleavages	Theo. MH+ [Da]	Confidence (by Search Engine): Sequest HT	Percolator q-Value (by Search Engine): Sequest HT	Percolator PEP (by Search Engine): Sequest HT	XCorr (by Search Engine): Sequest HT
	High	NTASFAGSK		0.00994777	0	1	1	1	YGR159C	0	882.432	High	0	0.006114	2.23
	High	NEETEEPATIFVGR		4.47475e-05	0	1	1	1	YGR159C	0	1591.76	High	0	1.853e-05	3.78
	High	SEDAEEEEDEESSNK		0.0128636	0	1	1	1	YGR159C	0	1726.64	High	0	0.008046	1.95
	High	QKNEETEEPATIFVGR		0.000645993	0	1	1	1	YGR159C	1	1847.91	High	0	0.0003243	3.46
	High	IPTHPETEQPK		0.0126952	0	1	1	2	YGR159C	0	1276.65	High	0	0.00794	2.15
	High	LSWSIDDEWLK		0.00402747	0	1	1	1	YGR159C	0	1391.68	High	0	0.002307	1.99
	High	EFEHIGGVIGAR		0.036286	0	1	1	2	YGR159C	0	1284.67	High	0	0.0246	2.03
	High	ALDALQGEYIDNRPVR		0.030417	0	1	1	1	YGR159C	0	1829.95	High	0	0.02023	2.79
	High	DAIFELFAK		0.00542102	0	1	1	1	YGR159C	0	1053.56	High	0	0.003173	2.33
	High	HGEVVSVR		0.00313351	0	1	1	1	YGR159C	0	882.479	High	0	0.001771	2.95
	High	LDFSSPRPNNDGGR		0.0249901	0	1	1	1	YGR159C	0	1531.72	High	0	0.01637	2.11
	High	KSEDAEEEEDEESSNK		6.16266e-06	0	1	1	1	YGR159C	1	1854.74	High	0	2.216e-06	4.65
	High	KSEDAEEEEDEESSNKK		7.62197e-11	0	1	1	2	YGR159C	2	1982.83	High	0	1.206e-11	5.8
	High	KEFEHIGGVIGAR		6.10461e-05	0	1	1	1	YGR159C	1	1412.76	High	0	2.59e-05	3.45
	High	GGFRPSGSGANTAPLGR		7.44317e-05	0	1	1	1	YGR159C	0	1601.81	High	0	3.206e-05	3.51
	High	GFGYVQFSNMEDAKK		0.00556608	0	1	1	1	YGR159C	1	1720.8	High	0	0.003267	1.82
	High	GFGYVQFSNMEDAKK	1xOxidation [M10]	0.00968881	0	1	1	1	YGR159C	1	1736.79	High	0	0.005927	2.63
	High	KFGDTPSEPSDTLFLGNLSFNADR		0.0715973	0.0022289	1	1	1	YGR159C	1	2628.26	High	0.001487	0.05104	2.21
	High	GYGYVDFENK		0.0601957	0.0022289	1	1	1	YGR159C	0	1191.53	High	0.001487	0.04243	2.14
High	Master Protein	YPL235W	RVB2 SGDID:S000006156, Chr XVI from 103232-104647, Genome Release 64-2-1, Verified ORF, "ATP-dependent DNA helicase, also known as reptin; member of the AAA+ and RuvB protein families, similar to Rvb1p; conserved component of multiple complexes including the INO80 complex, the Swr1 complex, and the R2TP complex (Rvb1-Rvb2-Tah1-Pih1); involved in multiple processes such as chromatin remodeling, bo…	0	66.114	42	20	29	20	1	471	51.6	5.31	71.57	20
	Confidence	Sequence	Modifications	Qvality PEP	Qvality q-value	# Protein Groups	# Proteins	# PSMs	Master Protein Accessions	# Missed Cleavages	Theo. MH+ [Da]	Confidence (by Search Engine): Sequest HT	Percolator q-Value (by Search Engine): Sequest HT	Percolator PEP (by Search Engine): Sequest HT	XCorr (by Search Engine): Sequest HT
	High	NNTVEVEDVKR		0.0241838	0	1	1	2	YPL235W	1	1302.66	High	0.005917	0.07597	2.07
	High	NNTVEVEDVK		0.0480025	0	1	1	1	YPL235W	0	1146.56	High	0	0.03304	2.17
	High	MVQNGTIAGR	1xOxidation [M1]	0.00943658	0	1	1	1	YPL235W	0	1062.54	High	0	0.005761	2.32
	High	MVQNGTIAGR		0.0134706	0	1	1	1	YPL235W	0	1046.54	High	0	0.008482	2.02
	High	MIDGLTK		0.0263358	0	1	1	1	YPL235W	0	777.418	High	0	0.01742	1.77
	High	VLAGDVISIDK		0.0126952	0	1	1	1	YPL235W	0	1129.65	High	0	0.007928	2.15
	High	TVVHTVSLHEIDVINSR		0.000110651	0	1	1	2	YPL235W	0	1919.03	High	0	0.00167	3.36
	High	TTDMETIYELGNK	1xOxidation [M4]	0.00077729	0	1	1	1	YPL235W	0	1530.7	High	0	0.0003975	2.56
	High	TTDMETIYELGNK		0.00232771	0	1	1	1	YPL235W	0	1514.7	High	0	0.001287	2.88
	High	YSSNLISVAQQIAMK	1xOxidation [M14]	0.00102592	0	1	1	4	YPL235W	0	1668.86	High	0	0.0005345	3.56
	High	TQGFLALFTGDTGEIR		0.000941471	0	1	1	1	YPL235W	0	1725.88	High	0	0.0004881	2.94
	High	TALAMGVSQSLGK	1xOxidation [M5]	4.47475e-05	0	1	1	1	YPL235W	0	1278.67	High	0	1.851e-05	2.91
	High	SYNEQEIK		0.0427051	0	1	1	1	YPL235W	0	1010.48	High	0	0.02913	1.96
	High	TGVETSLR		0.00895159	0	1	1	1	YPL235W	0	862.463	High	0	0.005448	2.36
	High	DYDAMGADTR	1xOxidation [M5]	0.00579098	0	1	1	1	YPL235W	0	1130.44	High	0	0.003414	2.11
	High	DYDAMGADTR		0.00419026	0	1	1	1	YPL235W	0	1114.45	High	0	0.002418	1.84
	High	FVQCPEGELQK	1xCarbamidomethyl [C4]	0.0379812	0	1	1	1	YPL235W	0	1334.64	High	0	0.02576	2.05
	High	AQEEEVELSSDALDLLTK		0.000819486	0	1	1	1	YPL235W	0	1989.99	High	0	0.0004198	2.54
	High	AYLLFLDSAR		0.0435465	0	1	1	1	YPL235W	0	1168.64	High	0	0.02976	2.56
	High	AVLVAGPPSTGK		0.0452782	0	1	1	1	YPL235W	0	1096.64	High	0	0.03115	2.03
	High	KNNTVEVEDVKR		3.09064e-05	0	1	1	1	YPL235W	2	1430.76	High	0	1.248e-05	4.81
	High	MIDGLTK	1xOxidation [M1]	0.0590427	0.00120145	1	1	1	YPL235W	0	793.412	High	0.0007987	0.04145	0.79
	High	AAGVILK		0.0702348	0.0022289	1	1	1	YPL235W	0	671.445	High	0.001487	0.05012	1.94
	High	KTVVHTVSLHEIDVINSR		0.068897	0.0022289	1	1	1	YPL235W	1	2047.13	High	0.001487	0.04888	2.8
High	Master Protein	YBL099W	ATP1 SGDID:S000000195, Chr II from 37053-38690, Genome Release 64-2-1, Verified ORF, "Alpha subunit of the F1 sector of mitochondrial F1F0 ATP synthase; which is a large, evolutionarily conserved enzyme complex required for ATP synthesis; F1 translationally regulates ATP6 and ATP8 expression to achieve a balanced output of ATP synthase genes encoded in nucleus and mitochondria; phosphorylated; N-…	0	64.452	43	22	24	22	1	545	58.6	9.04	61.28	22
	Confidence	Sequence	Modifications	Qvality PEP	Qvality q-value	# Protein Groups	# Proteins	# PSMs	Master Protein Accessions	# Missed Cleavages	Theo. MH+ [Da]	Confidence (by Search Engine): Sequest HT	Percolator q-Value (by Search Engine): Sequest HT	Percolator PEP (by Search Engine): Sequest HT	XCorr (by Search Engine): Sequest HT
	High	RSVHEPVQTGLK		0.000277256	0	1	1	1	YBL099W	1	1350.75	High	0	0.0001314	3.49
	High	QVAGSLK		0.0473836	0	1	1	1	YBL099W	0	702.414	High	0	0.03271	1.74
	High	QLSLLLR		0.0480025	0	1	1	1	YBL099W	0	842.546	High	0	0.03318	1.76
	High	IKGVSDEANLNETGR		0.000158101	0	1	1	1	YBL099W	1	1602.81	High	0	7.164e-05	4.21
	High	VLAVGDGIAR		0.0226478	0	1	1	1	YBL099W	0	970.568	High	0	0.01481	1.54
	High	VVDALGNPIDGK		0.00114788	0	1	1	1	YBL099W	0	1197.65	High	0	0.0006037	3.19
	High	STVAQLVQTLEQHDAMK	1xOxidation [M16]	0.000308176	0	1	1	1	YBL099W	0	1914.96	High	0	0.0001464	2.98
	High	SNHNELLTEIR		0.000105649	0	1	1	2	YBL099W	0	1325.68	High	0	4.646e-05	3.23
	High	SVHEPVQTGLK		0.0270353	0	1	1	1	YBL099W	0	1194.65	High	0	0.01787	2.15
	High	TAVALDTILNQK		2.56855e-05	0	1	1	1	YBL099W	0	1286.73	High	0	1.021e-05	2.89
	High	TGNIVDVPVGPGLLGR		0.0344396	0	1	1	1	YBL099W	0	1563.89	High	0	0.02311	2.28
	High	ELLASLK		0.0199908	0	1	1	1	YBL099W	0	773.477	High	0	0.01291	2.21
	High	EAYPGDVFYLHSR		0.00251975	0	1	1	1	YBL099W	0	1553.74	High	0	0.0014	2.51
	High	EVAAFAQFGSDLDASTK		0.00720024	0	1	1	1	YBL099W	0	1756.84	High	0	0.004308	2.4
	High	APGILPR		0.0408033	0	1	1	2	YBL099W	0	723.451	High	0.005416	0.07237	1.9
	High	AVDALVPIGR		0.0283038	0	1	1	1	YBL099W	0	1010.6	High	0	0.01874	2.38
	High	HALIVYDDLSK		4.59461e-05	0	1	1	1	YBL099W	0	1273.68	High	0	1.907e-05	3.61
	High	GVSDEANLNETGR		6.36969e-06	0	1	1	1	YBL099W	0	1361.63	High	0	2.294e-06	3.59
	High	GPIDAAGR		0.0189669	0	1	1	1	YBL099W	0	756.4	High	0	0.0122	2.37
	High	GIRPAINVGLSVSR		0.000973096	0	1	1	1	YBL099W	0	1438.85	High	0	0.0005039	3.56
	High	LFLAQYR		0.0492641	0.00120145	1	1	1	YBL099W	0	910.515	High	0.0007987	0.03409	1.85
	High	GMALNLEPGQVGIVLFGSDR	1xOxidation [M2]	0.0505579	0.00120145	1	1	1	YBL099W	0	2089.07	High	0.0007987	0.03512	2.31
High	Master Protein	YHR174W	ENO2 SGDID:S000001217, Chr VIII from 451327-452640, Genome Release 64-2-1, Verified ORF, "Enolase II, a phosphopyruvate hydratase; catalyzes conversion of 2-phosphoglycerate to phosphoenolpyruvate during glycolysis and the reverse reaction during gluconeogenesis; expression induced in response to glucose; ENO2 has a paralog, ENO1, that arose from the whole genome duplication"	0	62.735	51	18	31	10	1	437	46.9	6	73.35	18
	Confidence	Sequence	Modifications	Qvality PEP	Qvality q-value	# Protein Groups	# Proteins	# PSMs	Master Protein Accessions	# Missed Cleavages	Theo. MH+ [Da]	Confidence (by Search Engine): Sequest HT	Percolator q-Value (by Search Engine): Sequest HT	Percolator PEP (by Search Engine): Sequest HT	XCorr (by Search Engine): Sequest HT
	High	NVPLYQHLADLSK		0.0174129	0	1	1	3	YHR174W	0	1497.81	High	0.0004275	0.03352	2.68
	High	IGSEVYHNLK		9.19596e-05	0	2	2	2	YGR254W; YHR174W	0	1159.61	High	0	4.017e-05	3.44
	High	LGANAILGVSMAAAR	1xOxidation [M11]	0.000898915	0	1	1	2	YHR174W	0	1430.78	High	0	0.0004634	3.64
	High	YDLDFKNPESDK		0.000375748	0	1	1	1	YHR174W	1	1470.67	High	0	0.0001816	3.44
	High	VNQIGTLSESIK		0.00125914	0	2	2	3	YGR254W; YHR174W	0	1288.71	High	0	0.03068	2.63
	High	WLTGVELADMYHSLMK	2xOxidation [M10; M15]	0.00289472	0	1	1	1	YHR174W	0	1925.91	High	0	0.001623	2.82
	High	SIVPSGASTGVHEALEMR	1xOxidation [M17]	0.000426015	0	2	2	1	YGR254W; YHR174W	0	1856.92	High	0	0.0002086	2.79
	High	SIVPSGASTGVHEALEMR		0.00234314	0	2	2	1	YGR254W; YHR174W	0	1840.92	High	0	0.001291	3.13
	High	TAGIQIVADDLTVTNPAR		0.0102136	0	1	1	1	YHR174W	0	1854.99	High	0	0.006271	2.86
	High	TFAEAMR		0.0240257	0	1	1	1	YHR174W	0	825.392	High	0	0.0157	1.32
	High	LGANAILGVSMAAAR		0.0161973	0	1	1	1	YHR174W	0	1414.78	High	0	0.01031	2.61
	High	AAQDSFAANWGVMVSHR	1xOxidation [M13]	0.000483006	0	1	1	1	YHR174W	0	1862.86	High	0	0.0002386	3.62
	High	AADALLLK		0.00962513	0	2	2	1	YGR254W; YHR174W	0	814.503	High	0	0.005883	2.21
	High	AVYAGENFHHGDKL		0.0139216	0	1	1	2	YHR174W	1	1557.74	High	0	0.01339	2.57
	High	AVDDFLISLDGTANK		0.0429838	0	2	2	4	YGR254W; YHR174W	0	1578.8	High	0.001487	0.04424	2.37
	High	GVMNAVNNVNNVIAAAFVK	1xOxidation [M3]	0.00228203	0	1	1	3	YHR174W	0	1961.03	High	0	0.001259	3.95
	High	GNPTVEVELTTEK		0.000449142	0	2	2	2	YGR254W; YHR174W	0	1416.72	High	0	0.0002203	2.91
	High	KAADALLLK		0.0667216	0.0022289	2	2	1	YGR254W; YHR174W	1	942.598	High	0.001487	0.0473	2.73
	High	ANLDVK		0.0923497	0.00669635	2	2	2	YGR254W; YHR174W	0	659.372	High	0.004826	0.06731	1.91
	High	IEEELGDK		0.097745	0.00757788	1	1	1	YHR174W	0	932.457	High	0.005416	0.07157	1.56
High	Master Protein	YDR190C	RVB1 SGDID:S000002598, Chr IV from 841995-840604, Genome Release 64-2-1, reverse complement, Verified ORF, "ATP-dependent DNA helicase, also known as pontin; member of the AAA+ and RuvB-like protein families; similar to Rvb2p; conserved component of multiple complexes including the INO80 complex, the Swr1 complex, and the R2TP complex (Rvb1-Rvb2-Tah1-Pih1); involved in multiple processes such as …	0	61.156	45	17	23	17	1	463	50.4	5.87	62.46	17
	Confidence	Sequence	Modifications	Qvality PEP	Qvality q-value	# Protein Groups	# Proteins	# PSMs	Master Protein Accessions	# Missed Cleavages	Theo. MH+ [Da]	Confidence (by Search Engine): Sequest HT	Percolator q-Value (by Search Engine): Sequest HT	Percolator PEP (by Search Engine): Sequest HT	XCorr (by Search Engine): Sequest HT
	High	RVEGGFVGQIEAR		0.000473525	0	1	1	1	YDR190C	1	1417.75	High	0	0.0002331	3.76
	High	LQVESSALDLLATMGTETSLR	1xOxidation [M14]	0.0377343	0	1	1	1	YDR190C	0	2251.15	High	0	0.02552	2.56
	High	VEGGFVGQIEAR		2.34158e-05	0	1	1	1	YDR190C	0	1261.65	High	0	9.265e-06	3.51
	High	VPFCPLVGSELYSVEVK	1xCarbamidomethyl [C4]	8.57568e-06	0	1	1	1	YDR190C	0	1922.99	High	0	3.155e-06	3.32
	High	YALQLLAPCGILAQTSNR	1xCarbamidomethyl [C9]	2.27195e-06	0	1	1	1	YDR190C	0	1989.06	High	0	7.609e-07	3.99
	High	TISHVIVGLK		0.00165091	0	1	1	2	YDR190C	0	1066.66	High	0	0.008975	2.9
	High	TALALAISQELGPK		0.000654587	0	1	1	1	YDR190C	0	1411.82	High	0	0.0003297	2.94
	High	ENPGVNSSNSGAVTR		0.00220788	0	1	1	1	YDR190C	0	1488.7	High	0	0.001211	2.44
	High	EACGVIVDLIK	1xCarbamidomethyl [C3]	0.0214889	0	1	1	1	YDR190C	0	1216.66	High	0	0.01395	2.19
	High	AILLAGGPSTGK		0.00367178	0	1	1	2	YDR190C	0	1084.64	High	0	0.002103	2.56
	High	ALESNIAPVVVLASNR		3.01862e-06	0	1	1	2	YDR190C	0	1652.93	High	0	1.025e-06	3.84
	High	GTEDVISPHGVPPDLIDR		1.8389e-06	0	1	1	4	YDR190C	0	1916.97	High	0	1.111e-05	3.92
	High	GLGLDESGVAK		0.00123442	0	1	1	1	YDR190C	0	1045.55	High	0	0.0006528	2.1
	High	KEIVVNDVNEAK		0.0594246	0.00120145	1	1	1	YDR190C	1	1357.73	High	0.0007987	0.04168	1.98
	High	EIVVNDVNEAK		0.0546407	0.00120145	1	1	1	YDR190C	0	1229.64	High	0.0007987	0.03809	2.21
	High	KTETLMENFR	1xOxidation [M6]	0.0834437	0.00476234	1	1	1	YDR190C	1	1284.63	High	0.003546	0.06015	2.43
	High	LDPTIYESIQR		0.110117	0.0087043	1	1	1	YDR190C	0	1334.7	High	0.006158	0.08147	1.56
High	Master Protein	YJR121W	ATP2 SGDID:S000003882, Chr X from 647607-649142, Genome Release 64-2-1, Verified ORF, "Beta subunit of the F1 sector of mitochondrial F1F0 ATP synthase; which is a large, evolutionarily conserved enzyme complex required for ATP synthesis; F1 translationally regulates ATP6 and ATP8 expression to achieve a balanced output of ATP synthase genes encoded in nucleus and mitochondria; phosphorylated"	0	60.941	50	17	26	17	1	511	54.8	5.71	72.74	17
	Confidence	Sequence	Modifications	Qvality PEP	Qvality q-value	# Protein Groups	# Proteins	# PSMs	Master Protein Accessions	# Missed Cleavages	Theo. MH+ [Da]	Confidence (by Search Engine): Sequest HT	Percolator q-Value (by Search Engine): Sequest HT	Percolator PEP (by Search Engine): Sequest HT	XCorr (by Search Engine): Sequest HT
	High	IINVIGEPIDER		0.000505874	0	1	1	1	YJR121W	0	1367.75	High	0	0.0002492	3.2
	High	LKDTVASFK		0.0053147	0	1	1	1	YJR121W	1	1008.57	High	0	0.003109	2.51
	High	LVLEVAQHLGENTVR		0.0175278	0	1	1	1	YJR121W	0	1677.93	High	0	0.01119	2.47
	High	IPSAVGYQPTLATDMGLLQER	1xOxidation [M15]	0.0452782	0	1	1	1	YJR121W	0	2276.16	High	0	0.03109	3.65
	High	IPSAVGYQPTLATDMGLLQER		0.0254866	0	1	1	1	YJR121W	0	2260.16	High	0	0.01677	2.43
	High	VLDTGGPISVPVGR		3.84378e-05	0	1	1	1	YJR121W	0	1366.77	High	0	1.579e-05	3.97
	High	TVFIQELINNIAK		0.0292457	0	1	1	1	YJR121W	0	1502.86	High	0	0.01951	2.11
	High	VALVFGQMNEPPGAR	1xOxidation [M8]	0.000385812	0	1	1	3	YJR121W	0	1601.81	High	0	0.0001872	2.33
	High	VALTGLTIAEYFR		0.00115549	0	1	1	1	YJR121W	0	1453.8	High	0	0.0006084	2.86
	High	YDNIPEHAFYMVGGIEDVVAK	1xOxidation [M11]	4.1886e-05	0	1	1	2	YJR121W	0	2383.13	High	0	1.732e-05	4
	High	VVDLLAPYAR		0.0185965	0	1	1	1	YJR121W	0	1116.64	High	0	0.01199	2.54
	High	TIAMDGTEGLVR	1xOxidation [M4]	0.000947713	0	1	1	2	YJR121W	0	1278.64	High	0	0.0004893	2.42
	High	TIAMDGTEGLVR		0.00315428	0	1	1	1	YJR121W	0	1262.64	High	0	0.001785	2.56
	High	FLSQPFAVAEVFTGIPGK		0.00229715	0	1	1	1	YJR121W	0	1908.03	High	0	0.001272	3.27
	High	FTQAGSEVSALLGR		0.00549307	0	1	1	1	YJR121W	0	1435.75	High	0	0.003237	2.21
	High	ETGVINLEGESK		0.00901083	0	1	1	1	YJR121W	0	1275.64	High	0	0.005487	2.42
	High	AHGGFSVFTGVGER		0.00159726	0	1	1	2	YJR121W	0	1420.7	High	0	0.0008589	3
	High	KPIHADPPSFAEQSTSAEILETGIK		0.00121019	0	1	1	2	YJR121W	0	2666.37	High	0	0.0006369	4.04
	High	GISELGIYPAVDPLDSK		0.000798109	0	1	1	2	YJR121W	0	1773.93	High	0	0.007889	3.45
High	Master Protein	YCR012W	PGK1 SGDID:S000000605, Chr III from 137746-138996, Genome Release 64-2-1, Verified ORF, "3-phosphoglycerate kinase; catalyzes transfer of high-energy phosphoryl groups from the acyl phosphate of 1,3-bisphosphoglycerate to ADP to produce ATP; key enzyme in glycolysis and gluconeogenesis"	0	55.295	58	19	22	19	1	416	44.7	7.61	54.01	19
	Confidence	Sequence	Modifications	Qvality PEP	Qvality q-value	# Protein Groups	# Proteins	# PSMs	Master Protein Accessions	# Missed Cleavages	Theo. MH+ [Da]	Confidence (by Search Engine): Sequest HT	Percolator q-Value (by Search Engine): Sequest HT	Percolator PEP (by Search Engine): Sequest HT	XCorr (by Search Engine): Sequest HT
	High	ISHVSTGGGASLELLEGK		0.00175206	0	1	1	2	YCR012W	0	1754.93	High	0	0.00095	3.5
	High	VLENTEIGDSIFDK		0.00507466	0	1	1	1	YCR012W	0	1579.78	High	0	0.002959	2.86
	High	TVTDKEGIPAGWQGLDNGPESR		0.0166293	0	1	1	1	YCR012W	1	2327.13	High	0	0.01058	2.36
	High	VDFNVPLDGK		0.0032818	0	1	1	1	YCR012W	0	1103.57	High	0	0.001859	2.49
	High	YVLEHHPR		0.0023743	0	1	1	2	YCR012W	0	1050.55	High	0	0.001311	2.56
	High	YSLAPVAK		0.0284897	0	1	1	1	YCR012W	0	848.488	High	0	0.01894	1.58
	High	SSAAGNTVIIGGGDTATVAK		2.54207e-06	0	1	1	1	YCR012W	0	1789.93	High	0	8.545e-07	3.72
	High	TIVWNGPPGVFEFEK		0.0154681	0	1	1	1	YCR012W	0	1719.87	High	0	0.009777	1.83
	High	ELPGVAFLSEK		0.0120434	0	1	1	1	YCR012W	0	1189.65	High	0	0.007505	1.72
	High	ELQSLLGK		0.0104866	0	1	1	1	YCR012W	0	887.52	High	0	0.006486	2.34
	High	ALLDEVVK		0.00827033	0	1	1	1	YCR012W	0	886.524	High	0	0.005014	2.27
	High	ALENPTRPFLAILGGAK		0.0072959	0	1	1	1	YCR012W	0	1768.01	High	0	0.004388	2.58
	High	AAGFLLEK		0.0216305	0	1	1	1	YCR012W	0	848.488	High	0	0.01401	1.72
	High	AHSSMVGFDLPQR	1xOxidation [M5]	0.00397462	0	1	1	2	YCR012W	0	1460.7	High	0	0.002283	3.5
	High	AGAEIVPK		0.00131006	0	1	1	1	YCR012W	0	784.456	High	0	0.0006934	3.05
	High	ASAPGSVILLENLR		0.0210696	0	1	1	1	YCR012W	0	1439.82	High	0	0.01366	2.17
	High	GVEVVLPVDFIIADAFSADANTK		7.81787e-06	0	1	1	1	YCR012W	0	2391.24	High	0	2.854e-06	4.66
	High	KLFAATVAK		0.00907045	0	1	1	1	YCR012W	1	948.588	High	0	0.005536	2.93
	High	LSVQDLDLK		0.0748757	0.00384064	1	1	1	YCR012W	0	1030.58	High	0.002933	0.05344	2.36
High	Master Protein	YMR290C	HAS1 SGDID:S000004903, Chr XIII from 851591-850074, Genome Release 64-2-1, reverse complement, Verified ORF, "ATP-dependent RNA helicase; involved in the biogenesis of 40S and 60S ribosome subunits; localizes to both the nuclear periphery and nucleolus; highly enriched in nuclear pore complex fractions; constituent of 66S pre-ribosomal particles"	0	54.691	42	18	23	18	1	505	56.7	9.33	48.91	18
	Confidence	Sequence	Modifications	Qvality PEP	Qvality q-value	# Protein Groups	# Proteins	# PSMs	Master Protein Accessions	# Missed Cleavages	Theo. MH+ [Da]	Confidence (by Search Engine): Sequest HT	Percolator q-Value (by Search Engine): Sequest HT	Percolator PEP (by Search Engine): Sequest HT	XCorr (by Search Engine): Sequest HT
	High	NGTGIIVITPTR		0.00188413	0	1	1	1	YMR290C	0	1241.72	High	0	0.001024	2.85
	High	QSMLFSATQTTK	1xOxidation [M3]	0.028119	0	1	1	1	YMR290C	0	1358.66	High	0	0.01859	1.45
	High	QSMLFSATQTTK		0.0216305	0	1	1	1	YMR290C	0	1342.67	High	0	0.0141	1.72
	High	QNNAAPEGEQTTCVEK	1xCarbamidomethyl [C13]	0.0038202	0	1	1	1	YMR290C	0	1775.79	High	0	0.002195	2.2
	High	ILEIGFEDEMR	1xOxidation [M10]	0.00117087	0	1	1	1	YMR290C	0	1367.65	High	0	0.0006147	2.88
	High	LLDHLQNTK		0.0245032	0	1	1	1	YMR290C	0	1081.6	High	0	0.01609	2.63
	High	TVYQIDKLDLAK		0.0026565	0	1	1	1	YMR290C	1	1406.79	High	0	0.001479	2.39
	High	VPLNEYEFPENK		4.9085e-05	0	1	1	1	YMR290C	0	1478.72	High	0	2.05e-05	3.56
	High	SRDSESTEEPVVDEK		0.0476921	0	1	1	1	YMR290C	1	1706.77	High	0	0.03302	2.52
	High	SNYYLHQTAK		0.0141062	0	1	1	1	YMR290C	0	1224.6	High	0	0.008893	2.27
	High	SYLQAYASHSLK		0.00205311	0	1	1	2	YMR290C	0	1367.7	High	0	0.001122	2.62
	High	SYGFPVPPK		0.00507466	0	1	1	2	YMR290C	0	991.525	High	0	0.002957	2.01
	High	ELMEFHSQTFGIVIGGANR	1xOxidation [M3]	7.44317e-05	0	1	1	1	YMR290C	0	2122.04	High	0	3.205e-05	3.6
	High	ELALQIFGVAR		0.000663296	0	1	1	1	YMR290C	0	1216.7	High	0	0.0003346	2.84
	High	GVNMLIATPGR	1xOxidation [M4]	0.000708607	0	1	1	2	YMR290C	0	1144.61	High	0	0.0003577	3.18
	High	IANVQSQLEK		0.000139446	0	1	1	1	YMR290C	0	1129.62	High	0	6.29e-05	3.24
	High	GILICTDVAAR	1xCarbamidomethyl [C5]	0.0053147	0	1	1	1	YMR290C	0	1188.64	High	0	0.003113	2.53
	High	DVLGAAK		0.0667216	0.0022289	1	1	1	YMR290C	0	673.388	High	0.001487	0.04722	1.59
	High	GVNMLIATPGR		0.112901	0.0087043	1	1	1	YMR290C	0	1128.62	High	0.006158	0.08336	1.46
	High	SLMFLTPNELGFLR	1xOxidation [M3]	0.113607	0.00917297	1	1	1	YMR290C	0	1653.87	High	0.006466	0.08384	1.54
High	Master Protein	YLR175W	CBF5 SGDID:S000004165, Chr XII from 506134-507585, Genome Release 64-2-1, Verified ORF, "Pseudouridine synthase catalytic subunit of box H/ACA snoRNPs; acts on large and small rRNAs, on snRNA U2, and on some mRNAs; mutations in human ortholog dyskerin cause the disorder dyskeratosis congenita; small nucleolar ribonucleoprotein particles are also known as snoRNPs"	0	53.406	49	16	19	16	1	483	54.7	8.9	47.38	16
	Confidence	Sequence	Modifications	Qvality PEP	Qvality q-value	# Protein Groups	# Proteins	# PSMs	Master Protein Accessions	# Missed Cleavages	Theo. MH+ [Da]	Confidence (by Search Engine): Sequest HT	Percolator q-Value (by Search Engine): Sequest HT	Percolator PEP (by Search Engine): Sequest HT	XCorr (by Search Engine): Sequest HT
	High	NLGVFWASCEAGTYMR	1xCarbamidomethyl [C9]; 1xOxidation [M15]	0.0308176	0	1	1	1	YLR175W	0	1877.83	High	0	0.02054	1.83
	High	LHDALKDEK		0.00239004	0	1	1	2	YLR175W	1	1068.57	High	0	0.001397	3.32
	High	VTGCLIVCIDR	2xCarbamidomethyl [C4; C8]	0.000138527	0	1	1	1	YLR175W	0	1305.67	High	0	6.211e-05	2.87
	High	SLENLTGALFQRPPLISAVK		3.15253e-05	0	1	1	1	YLR175W	0	2154.23	High	0	1.27e-05	3.96
	High	SGHYTPIPAGSSPLKR		0.000134025	0	1	1	1	YLR175W	1	1667.89	High	0	6.01e-05	3.44
	High	TIYESNLIEFDNKR		0.000131394	0	1	1	1	YLR175W	1	1741.88	High	0	5.908e-05	3.43
	High	TLCVHLGMLLGVGGHMQELR	1xCarbamidomethyl [C3]; 2xOxidation [M8; M16]	0.00419026	0	1	1	1	YLR175W	0	2253.13	High	0	0.002413	2.78
	High	SYISSGVINLDKPSNPSSHEVVAWIK		0.00341447	0	1	1	1	YLR175W	0	2827.46	High	0	0.001933	1.71
	High	TGHSGTLDPK		0.0181138	0	1	1	3	YLR175W	0	1012.51	High	0	0.01261	2.23
	High	DSAVNAVCYGAK	1xCarbamidomethyl [C8]	0.0212085	0	1	1	1	YLR175W	0	1254.58	High	0	0.01381	1.95
	High	EDFVIKPEAAGASTDTSEWPLLLK		0.0166293	0	1	1	1	YLR175W	0	2617.34	High	0	0.01061	2.9
	High	EVETEKEEVKEDDSK		1.89526e-05	0	1	1	1	YLR175W	2	1793.83	High	0	7.365e-06	4.47
	High	EYVPLDNAEQSTSSSQETK		7.51395e-06	0	1	1	1	YLR175W	0	2112.96	High	0	2.739e-06	3.55
	High	EYVCIVR	1xCarbamidomethyl [C4]	0.0296311	0	1	1	1	YLR175W	0	938.476	High	0	0.01967	1.79
	High	AKEDSLIK		0.0275719	0	1	1	1	YLR175W	1	903.515	High	0	0.01824	2.18
	High	VNENTPEQWKK		0.0720571	0.0022289	1	1	1	YLR175W	1	1372.69	High	0.001487	0.05122	2.05
High	Master Protein	YOR063W	RPL3 SGDID:S000005589, Chr XV from 444686-445849, Genome Release 64-2-1, Verified ORF, "Ribosomal 60S subunit protein L3; homologous to mammalian ribosomal protein L3 and bacterial L3; plays an important role in function of eIF5B in stimulating 3' end processing of 18S rRNA in context of 80S ribosomes that have not yet engaged in translation; involved in replication and maintenance of killer doub…	0	43.898	40	16	21	16	1	387	43.7	10.29	44.43	16
	Confidence	Sequence	Modifications	Qvality PEP	Qvality q-value	# Protein Groups	# Proteins	# PSMs	Master Protein Accessions	# Missed Cleavages	Theo. MH+ [Da]	Confidence (by Search Engine): Sequest HT	Percolator q-Value (by Search Engine): Sequest HT	Percolator PEP (by Search Engine): Sequest HT	XCorr (by Search Engine): Sequest HT
	High	NDFIMVK	1xOxidation [M5]	0.036286	0	1	1	1	YOR063W	0	882.439	High	0	0.02448	1.96
	High	NDFIMVK		0.0483149	0	1	1	1	YOR063W	0	866.444	High	0.0004275	0.0334	1.63
	High	VLVHTQIR		0.0226478	0	1	1	1	YOR063W	0	965.589	High	0	0.01478	1.82
	High	VACIGAWHPAHVMWSVAR	1xCarbamidomethyl [C3]; 1xOxidation [M13]	2.83621e-05	0	1	1	1	YOR063W	0	2064.01	High	0	1.137e-05	2.99
	High	YAQDGAGIER		0.00046423	0	1	1	1	YOR063W	0	1079.51	High	0	0.0002277	2.24
	High	WIDTASK		0.0467725	0	1	1	1	YOR063W	0	820.42	High	0	0.0323	1.23
	High	SLTTVWAEHLSDEVK		0.000375748	0	1	1	2	YOR063W	0	1714.86	High	0	0.0001819	3.2
	High	TITPMGGFVHYGEIK	1xOxidation [M5]	0.0358154	0	1	1	1	YOR063W	0	1665.83	High	0	0.02411	2.77
	High	ALEEVSLK		0.0480025	0	1	1	1	YOR063W	0	888.504	High	0	0.03305	1.8
	High	AGMTTIVR	1xOxidation [M3]	0.0112012	0	1	1	2	YOR063W	0	864.461	High	0	0.006916	2.54
	High	AGMTTIVR		0.00821595	0	1	1	1	YOR063W	0	848.466	High	0	0.004981	2.31
	High	GDDEANGATSFDR		0.00070394	0	1	1	1	YOR063W	0	1354.55	High	0	0.0003562	2.88
	High	HAFMGTLK		0.00441758	0	1	1	1	YOR063W	0	904.471	High	0	0.002555	2.54
	High	KSLYTNTSR		0.0100136	0	1	1	1	YOR063W	1	1069.56	High	0	0.006142	2.09
	High	KALEEVSLK		0.0167391	0	1	1	2	YOR063W	1	1016.6	High	0	0.02747	2.59
	High	GHGFEGVTHR		0.00956187	0	1	1	1	YOR063W	0	1096.53	High	0	0.005849	2.81
	High	SKPVALTSFLGYK		0.0855908	0.00522949	1	1	1	YOR063W	0	1410.8	High	0.003855	0.06174	2.04
	High	TPLAQK		0.110117	0.0087043	1	1	1	YOR063W	0	657.393	High	0.006158	0.08147	1.94
High	Master Protein	YLL011W	SOF1 SGDID:S000003934, Chr XII from 127523-128992, Genome Release 64-2-1, Verified ORF, "Protein required for biogenesis of 40S (small) ribosomal subunit; has similarity to the beta subunit of trimeric G-proteins and the splicing factor Prp4p; essential gene"	0	41.536	36	15	16	15	1	489	56.8	9.41	38.25	15
	Confidence	Sequence	Modifications	Qvality PEP	Qvality q-value	# Protein Groups	# Proteins	# PSMs	Master Protein Accessions	# Missed Cleavages	Theo. MH+ [Da]	Confidence (by Search Engine): Sequest HT	Percolator q-Value (by Search Engine): Sequest HT	Percolator PEP (by Search Engine): Sequest HT	XCorr (by Search Engine): Sequest HT
	High	NSSDNDSVTNEEGLIR		5.82342e-07	0	1	1	1	YLL011W	0	1749.79	High	0	1.762e-07	3.38
	High	NLNPELHPFER		0.00278223	0	1	1	1	YLL011W	0	1365.69	High	0	0.001557	2.75
	High	NIELSSIK		0.0302186	0	1	1	1	YLL011W	0	903.515	High	0	0.02013	2.02
	High	NKLEYDEK		0.0266833	0	1	1	1	YLL011W	1	1038.51	High	0	0.01756	2.24
	High	SADDYVPVK		0.0171854	0	1	1	1	YLL011W	0	993.489	High	0	0.01101	2.27
	High	LKPVSDLSWGADNITSLK		0.0087185	0	1	1	1	YLL011W	0	1944.04	High	0	0.00531	3.04
	High	YIISGSDDGNVR		0.00614546	0	1	1	1	YLL011W	0	1295.62	High	0	0.003651	2.04
	High	SQNFMLSCSDDK	1xCarbamidomethyl [C8]; 1xOxidation [M5]	0.000892995	0	1	1	1	YLL011W	0	1447.58	High	0	0.0004597	2.89
	High	STQESQMPR		0.0245032	0	1	1	1	YLL011W	0	1063.48	High	0	0.01602	1.97
	High	TFDGESAFQGIDSHR		6.39364e-05	0	1	1	2	YLL011W	0	1666.75	High	0	2.727e-05	3.86
	High	ENSTFATGGAK		0.00408102	0	1	1	1	YLL011W	0	1082.51	High	0	0.002348	2.69
	High	AHYGLVTGLCVTQPR	1xCarbamidomethyl [C10]	0.00860424	0	1	1	1	YLL011W	0	1671.86	High	0	0.005228	2.83
	High	DGVYAIAK		0.00943658	0	1	1	1	YLL011W	0	836.451	High	0	0.00576	2.55
	High	LATGSADGVIK		0.0275719	0	1	1	1	YLL011W	0	1031.57	High	0	0.01826	1.98
	High	LWSINVDDYSNK		0.0697861	0.0022289	1	1	1	YLL011W	0	1453.7	High	0.001487	0.04963	1.47
High	Master Protein	YAL038W	CDC19 SGDID:S000000036, Chr I from 71786-73288, Genome Release 64-2-1, Verified ORF, "Pyruvate kinase; functions as a homotetramer in glycolysis to convert phosphoenolpyruvate to pyruvate, the input for aerobic (TCA cycle) or anaerobic (glucose fermentation) respiration; regulated via allosteric activation by fructose bisphosphate; CDC19 has a paralog, PYK2, that arose from the whole genome dupli…	0	40.041	46	17	19	17	1	500	54.5	7.68	45.17	17
	Confidence	Sequence	Modifications	Qvality PEP	Qvality q-value	# Protein Groups	# Proteins	# PSMs	Master Protein Accessions	# Missed Cleavages	Theo. MH+ [Da]	Confidence (by Search Engine): Sequest HT	Percolator q-Value (by Search Engine): Sequest HT	Percolator PEP (by Search Engine): Sequest HT	XCorr (by Search Engine): Sequest HT
	High	NCTPKPTSTTETVAASAVAAVFEQK	1xCarbamidomethyl [C2]	0.0137394	0	1	1	1	YAL038W	0	2608.29	High	0	0.008652	2.97
	High	SEELYPGRPLAIALDTK		0.00114788	0	1	1	1	YAL038W	0	1873.01	High	0	0.0006031	3.08
	High	IMYVDYK	1xOxidation [M2]	0.0418796	0	1	1	2	YAL038W	0	947.454	High	0	0.02871	2.13
	High	LTSLNVVAGSDLR		0.00243788	0	1	1	1	YAL038W	0	1344.75	High	0	0.001356	2.57
	High	YRPNCPIILVTR	1xCarbamidomethyl [C5]	0.010696	0	1	1	1	YAL038W	0	1501.83	High	0	0.00659	3.44
	High	VTDGVMVAR	1xOxidation [M6]	0.00943658	0	1	1	1	YAL038W	0	963.493	High	0	0.005788	2.45
	High	TNNPETLVALR		0.0143876	0	1	1	1	YAL038W	0	1227.67	High	0	0.009094	2.04
	High	TANDVLTIR		0.00364761	0	1	1	1	YAL038W	0	1002.56	High	0	0.002087	2.82
	High	EVLGEQGK		0.00652159	0	1	1	1	YAL038W	0	859.452	High	0	0.003877	2.33
	High	AIIVLSTSGTTPR		4.41599e-05	0	1	1	1	YAL038W	0	1315.76	High	0	1.825e-05	3.38
	High	AGAGHSNTLQVSTV		0.00614546	0	1	1	1	YAL038W	0	1341.68	High	0	0.003642	2.76
	High	GDLGIEIPAPEVLAVQK		0.0111276	0	1	1	1	YAL038W	0	1748.98	High	0	0.006876	1.75
	High	KGDTYVSIQGFK		0.00582934	0	1	1	2	YAL038W	1	1342.7	High	0	0.006254	3.28
	High	EVLGEQGKDVK		0.0539387	0.00120145	1	1	1	YAL038W	1	1201.64	High	0.0007987	0.0377	3.2
	High	EPVSDWTDDVEAR		0.0889097	0.00571894	1	1	1	YAL038W	0	1518.67	High	0.004177	0.06431	1.5
	High	TGTTTNDVDYPIPPNHEMIFTTDDK	1xOxidation [M18]	0.109431	0.0087043	1	1	1	YAL038W	0	2838.28	High	0.006158	0.08047	1.68
	High	GVNLPGTDVDLPALSEKDKEDLR		0.112199	0.0087043	1	1	1	YAL038W	2	2481.28	High	0.006158	0.08285	2.86
High	Master Protein	YML056C	IMD4 SGDID:S000004520, Chr XIII from 163308-162194,164176-163717, Genome Release 64-2-1, reverse complement, Verified ORF, "Inosine monophosphate dehydrogenase; catalyzes the rate-limiting step in the de novo synthesis of GTP; member of a four-gene family in S. cerevisiae, constitutively expressed; IMD4 has a paralog, IMD3, that arose from the whole genome duplication"	0	40.037	34	12	17	5	1	524	56.4	8.16	40.5	12
	Confidence	Sequence	Modifications	Qvality PEP	Qvality q-value	# Protein Groups	# Proteins	# PSMs	Master Protein Accessions	# Missed Cleavages	Theo. MH+ [Da]	Confidence (by Search Engine): Sequest HT	Percolator q-Value (by Search Engine): Sequest HT	Percolator PEP (by Search Engine): Sequest HT	XCorr (by Search Engine): Sequest HT
	High	NQNYPLASK		0.00614546	0	3	3	1	YLR432W; YML056C; YHR216W	0	1034.53	High	0	0.003645	2.14
	High	QLLCGAAIGTIEADKER	1xCarbamidomethyl [C4]	0.000205936	0	1	1	1	YML056C	1	1844.95	High	0	9.533e-05	3.96
	High	LLIVDDNGNLVSMLSR	1xOxidation [M13]	0.00212207	0	2	2	2	YLR432W; YML056C	0	1774.94	High	0	0.01278	2.03
	High	LVGLVTSR		0.0288653	0	1	1	1	YML056C	0	844.525	High	0	0.01914	1.75
	High	YFSESDSVLVAQGVSGAVVDK		0.00116315	0	3	4	1	YLR432W; YML056C; YHR216W	0	2157.07	High	0	0.0006129	3.77
	High	TASAQLEGGVHNLHSYEK		6.60843e-05	0	3	3	2	YLR432W; YML056C; YHR216W	0	1940.95	High	0	5.391e-05	3.56
	High	EQAANLIAAGADGLR		0.00293321	0	3	4	2	YLR432W; YML056C; YHR216W	0	1469.77	High	0	0.001653	3.25
	High	ETFPDLEIIAGNVATR		4.81214e-05	0	2	2	1	YLR432W; YML056C	0	1745.91	High	0	2.002e-05	2.89
	High	ALALGSSTVMMGGMLAGTTESPGEYFYK	3xOxidation [M10; M11; M14]	0.036286	0	1	1	1	YML056C	0	2917.33	High	0	0.02456	2.68
	High	DGLSVQELMDSTTR	1xOxidation [M9]	0.0279355	0	1	1	2	YML056C	0	1567.73	High	0	0.01853	1.57
	High	GMGSIDAMQK	2xOxidation [M2; M8]	0.00424597	0	3	4	2	YLR432W; YML056C; YHR216W	0	1069.47	High	0	0.002449	2.29
	High	EGNEILK		0.057911	0.00120145	1	1	1	YML056C	0	802.431	High	0.0007987	0.04055	2.02
High	Master Protein	YGL078C	DBP3 SGDID:S000003046, Chr VII from 361859-360288, Genome Release 64-2-1, reverse complement, Verified ORF, "RNA-Dependent ATPase, member of DExD/H-box family; involved in cleavage of site A3 within the ITS1 spacer during rRNA processing; not essential for growth, but deletion causes severe slow-growth phenotype"	0	37.381	32	15	15	15	1	523	58.8	9.13	33.27	15
	Confidence	Sequence	Modifications	Qvality PEP	Qvality q-value	# Protein Groups	# Proteins	# PSMs	Master Protein Accessions	# Missed Cleavages	Theo. MH+ [Da]	Confidence (by Search Engine): Sequest HT	Percolator q-Value (by Search Engine): Sequest HT	Percolator PEP (by Search Engine): Sequest HT	XCorr (by Search Engine): Sequest HT
	High	VLIFALYK		0.0402753	0	1	1	1	YGL078C	0	966.602	High	0	0.0274	2.11
	High	VSIGNTDQLTANKR		0.000434545	0	1	1	1	YGL078C	1	1516.81	High	0	0.0002123	3.46
	High	VSIGNTDQLTANK		0.0193446	0	1	1	1	YGL078C	0	1360.71	High	0	0.01243	1.95
	High	SNLLLATDVAAR		0.00103272	0	1	1	1	YGL078C	0	1243.7	High	0	0.0005372	3.14
	High	ELASTFMNNPIK	1xOxidation [M7]	4.21637e-05	0	1	1	1	YGL078C	0	1380.68	High	0	1.735e-05	3.14
	High	DVVGVAETGSGK		0.00112535	0	1	1	1	YGL078C	0	1118.57	High	0	0.0005916	2.87
	High	FPKPTPIQAVAWPYLLSGK		0.0151657	0	1	1	1	YGL078C	0	2113.18	High	0	0.009581	3.15
	High	AGQTGTAHTLFTEQEK		3.56089e-06	0	1	1	1	YGL078C	0	1718.83	High	0	1.23e-06	4.23
	High	GIQVLVISPTR		0.00166186	0	1	1	1	YGL078C	0	1182.72	High	0	0.0008944	3.03
	High	TVINLTFPLTVEDYVHR		0.0522217	0.00120145	1	1	1	YGL078C	0	2017.08	High	0.0007987	0.03617	2.58
	High	ELASQIYDNLIVLTDK		0.0515499	0.00120145	1	1	1	YGL078C	0	1834.98	High	0.0007987	0.03583	1.26
	High	TQALNEFK		0.0625673	0.0022289	1	1	1	YGL078C	0	950.494	High	0.001487	0.04396	1.82
	High	EVEVPEK		0.0693402	0.0022289	1	1	1	YGL078C	0	829.43	High	0.001487	0.04915	1.81
	High	EVEVPEKESEK		0.0777994	0.004336	1	1	1	YGL078C	1	1302.64	High	0.003264	0.05592	1.93
	High	SQVVVATPGR		0.0872353	0.00522949	1	1	1	YGL078C	0	1013.57	High	0.004177	0.06326	1.58
High	Master Protein	YLR432W	IMD3 SGDID:S000004424, Chr XII from 1002557-1004128, Genome Release 64-2-1, Verified ORF, "Inosine monophosphate dehydrogenase; catalyzes the rate-limiting step in the de novo synthesis of GTP; member of a four-gene family in S. cerevisiae, constitutively expressed; IMD3 has a paralog, IMD4, that arose from the whole genome duplication"	0	36.998	28	10	15	2	1	523	56.5	7.4	36.99	10
	Confidence	Sequence	Modifications	Qvality PEP	Qvality q-value	# Protein Groups	# Proteins	# PSMs	Master Protein Accessions	# Missed Cleavages	Theo. MH+ [Da]	Confidence (by Search Engine): Sequest HT	Percolator q-Value (by Search Engine): Sequest HT	Percolator PEP (by Search Engine): Sequest HT	XCorr (by Search Engine): Sequest HT
	High	NQNYPLASK		0.00614546	0	3	3	1	YLR432W; YML056C; YHR216W	0	1034.53	High	0	0.003645	2.14
	High	NPVTGAQGITLSEGNEILK		0.00913048	0	2	3	1	YLR432W; YHR216W	0	1941.03	High	0	0.005553	1.03
	High	QLLCGAAIGTIDADKER	1xCarbamidomethyl [C4]	0.00754063	0	1	1	1	YLR432W	1	1830.94	High	0	0.004546	2.93
	High	LLIVDDNGNLVSMLSR	1xOxidation [M13]	0.00212207	0	2	2	2	YLR432W; YML056C	0	1774.94	High	0	0.01278	2.03
	High	LMGIVTSR	1xOxidation [M2]	0.0384796	0	1	1	1	YLR432W	0	892.492	High	0	0.02618	2.21
	High	YFSESDSVLVAQGVSGAVVDK		0.00116315	0	3	4	1	YLR432W; YML056C; YHR216W	0	2157.07	High	0	0.0006129	3.77
	High	TASAQLEGGVHNLHSYEK		6.60843e-05	0	3	3	2	YLR432W; YML056C; YHR216W	0	1940.95	High	0	5.391e-05	3.56
	High	EQAANLIAAGADGLR		0.00293321	0	3	4	2	YLR432W; YML056C; YHR216W	0	1469.77	High	0	0.001653	3.25
	High	ETFPDLEIIAGNVATR		4.81214e-05	0	2	2	1	YLR432W; YML056C	0	1745.91	High	0	2.002e-05	2.89
	High	GMGSIDAMQK	2xOxidation [M2; M8]	0.00424597	0	3	4	2	YLR432W; YML056C; YHR216W	0	1069.47	High	0	0.002449	2.29
	High	LMGIVTSR		0.0777994	0.004336	1	1	1	YLR432W	0	876.497	High	0.003264	0.05569	1.76
High	Master Protein	YOR272W	YTM1 SGDID:S000005798, Chr XV from 832813-834195, Genome Release 64-2-1, Verified ORF, "Constituent of 66S pre-ribosomal particles; forms a complex with Nop7p and Erb1p that is required for maturation of the large ribosomal subunit; has seven C-terminal WD repeats"	0	36.737	29	12	15	12	1	460	51.3	6.96	32.14	12
	Confidence	Sequence	Modifications	Qvality PEP	Qvality q-value	# Protein Groups	# Proteins	# PSMs	Master Protein Accessions	# Missed Cleavages	Theo. MH+ [Da]	Confidence (by Search Engine): Sequest HT	Percolator q-Value (by Search Engine): Sequest HT	Percolator PEP (by Search Engine): Sequest HT	XCorr (by Search Engine): Sequest HT
	High	QYSGHSGPIR		0.00121822	0	1	1	1	YOR272W	0	1101.54	High	0	0.0006432	2.78
	High	LVSAGNDR		0.0159856	0	1	1	1	YOR272W	0	831.432	High	0	0.01016	1.37
	High	TWDLSGNVQK		0.000604685	0	1	1	1	YOR272W	0	1147.57	High	0	0.0003031	2.74
	High	VTQQQLIGHK		0.000752028	0	1	1	2	YOR272W	0	1151.65	High	0	0.0003813	2.7
	High	TSLHDYLTK		0.00402747	0	1	1	2	YOR272W	0	1077.56	High	0	0.01867	2.53
	High	TLAILEGHK		0.00248668	0	1	1	1	YOR272W	0	981.573	High	0	0.001378	2.01
	High	EKDELLHVQDTPMYAPISLK	1xOxidation [M13]	0.00582934	0	1	1	1	YOR272W	1	2343.19	High	0	0.003454	3.22
	High	HITLHDPR		0.0246645	0	1	1	2	YOR272W	0	988.532	High	0	0.02451	2.27
	High	HIISGSYDGIVR		0.0100136	0	1	1	1	YOR272W	0	1316.7	High	0	0.006152	2.82
	High	KGLSSEASLNVEYTR		0.000137615	0	1	1	1	YOR272W	1	1653.84	High	0	6.167e-05	4.32
	High	EMTVVDPLEDINNPNNK	1xOxidation [M2]	0.0883482	0.00571894	1	1	1	YOR272W	0	1957.92	High	0.004177	0.06418	1.28
	High	YISNTR		0.110807	0.0087043	1	1	1	YOR272W	0	753.389	High	0.006158	0.08168	1.1
High	Master Protein	YLR328W	NMA1 SGDID:S000004320, Chr XII from 784913-786118, Genome Release 64-2-1, Verified ORF, "Nicotinic acid mononucleotide adenylyltransferase; catalyzes the transfer of the adenylyl moiety of ATP to nicotinamide mononucleotide to form NAD; involved in pathways of NAD biosynthesis, including the de novo, NAD(+) salvage, and nicotinamide riboside salvage pathways; homolog of human NMNAT; NMA1 has a pa…	0	35.465	34	11	13	7	1	401	45.8	6.9	24.86	11
	Confidence	Sequence	Modifications	Qvality PEP	Qvality q-value	# Protein Groups	# Proteins	# PSMs	Master Protein Accessions	# Missed Cleavages	Theo. MH+ [Da]	Confidence (by Search Engine): Sequest HT	Percolator q-Value (by Search Engine): Sequest HT	Percolator PEP (by Search Engine): Sequest HT	XCorr (by Search Engine): Sequest HT
	High	SFLLSHDIMYEHR	1xOxidation [M9]	0.0290549	0	2	2	1	YGR010W; YLR328W	0	1663.79	High	0	0.01932	2.02
	High	QLIYNDISSTK		0.000120578	0	2	2	1	YGR010W; YLR328W	0	1281.67	High	0	5.353e-05	2.8
	High	MFEMALDAISEQTR	2xOxidation [M1; M4]	0.0337712	0	1	1	1	YLR328W	0	1673.75	High	0	0.02262	1.15
	High	MCELACER	2xCarbamidomethyl [C2; C6]	0.0298257	0	2	2	1	YGR010W; YLR328W	0	1068.43	High	0	0.01985	1.11
	High	LYVDQTEPVK		0.00665201	0	1	1	1	YLR328W	0	1191.63	High	0	0.003962	2.14
	High	VLDHFNHEINIK		0.000308176	0	2	2	1	YGR010W; YLR328W	0	1478.78	High	0	0.0001469	2.58
	High	YGSDSTTESETR		5.79026e-05	0	1	1	1	YLR328W	0	1332.55	High	0	2.444e-05	2.65
	High	YQIADLEEVPHGIVR		0.000863973	0	1	1	2	YLR328W	0	1738.91	High	0	0.0004432	3.18
	High	TLEDYEFPSHR		6.78544e-05	0	1	1	2	YLR328W	0	1393.64	High	0	2.909e-05	2.68
	High	GGVATVTGEK		0.00270967	0	1	1	1	YLR328W	0	918.489	High	0	0.001514	2.32
	High	APDFKPPSADEELIPPPDPESK		0.0793017	0.00476234	1	1	1	YLR328W	0	2376.16	High	0.003546	0.05686	2.68
High	Master Protein	YGR254W	ENO1 SGDID:S000003486, Chr VII from 1000927-1002240, Genome Release 64-2-1, Verified ORF, "Enolase I, a phosphopyruvate hydratase; catalyzes conversion of 2-phosphoglycerate to phosphoenolpyruvate during glycolysis and the reverse reaction during gluconeogenesis; expression repressed in response to glucose; protein abundance increases in response to DNA replication stress; N-terminally propionyla…	0	33.987	28	11	17	3	1	437	46.8	6.62	39.67	11
	Confidence	Sequence	Modifications	Qvality PEP	Qvality q-value	# Protein Groups	# Proteins	# PSMs	Master Protein Accessions	# Missed Cleavages	Theo. MH+ [Da]	Confidence (by Search Engine): Sequest HT	Percolator q-Value (by Search Engine): Sequest HT	Percolator PEP (by Search Engine): Sequest HT	XCorr (by Search Engine): Sequest HT
	High	NVNDVIAPAFVK		0.00478188	0	1	1	1	YGR254W	0	1286.71	High	0	0.002776	2.9
	High	IGSEVYHNLK		9.19596e-05	0	2	2	2	YGR254W; YHR174W	0	1159.61	High	0	4.017e-05	3.44
	High	VNQIGTLSESIK		0.00125914	0	2	2	3	YGR254W; YHR174W	0	1288.71	High	0	0.03068	2.63
	High	SIVPSGASTGVHEALEMR	1xOxidation [M17]	0.000426015	0	2	2	1	YGR254W; YHR174W	0	1856.92	High	0	0.0002086	2.79
	High	SIVPSGASTGVHEALEMR		0.00234314	0	2	2	1	YGR254W; YHR174W	0	1840.92	High	0	0.001291	3.13
	High	AADALLLK		0.00962513	0	2	2	1	YGR254W; YHR174W	0	814.503	High	0	0.005883	2.21
	High	AVDDFLISLDGTANK		0.0429838	0	2	2	4	YGR254W; YHR174W	0	1578.8	High	0.001487	0.04424	2.37
	High	HLADLSK		0.0418796	0	1	1	1	YGR254W	0	783.436	High	0	0.02863	1.98
	High	GNPTVEVELTTEK		0.000449142	0	2	2	2	YGR254W; YHR174W	0	1416.72	High	0	0.0002203	2.91
	High	KAADALLLK		0.0667216	0.0022289	2	2	1	YGR254W; YHR174W	1	942.598	High	0.001487	0.0473	2.73
	High	ANLDVK		0.0923497	0.00669635	2	2	2	YGR254W; YHR174W	0	659.372	High	0.004826	0.06731	1.91
	High	IEEELGDNAVFAGENFHHGDKL		0.112901	0.0087043	1	1	1	YGR254W	1	2441.14	High	0.006158	0.08323	2.93
High	Master Protein	YNL248C	RPA49 SGDID:S000005192, Chr XIV from 182608-181361, Genome Release 64-2-1, reverse complement, Verified ORF, "RNA polymerase I subunit A49; essential for nucleolar assembly and for high polymerase loading rate; required for nucleolar localization of Rpa34p"	0	33.808	27	11	14	11	1	415	46.6	9.54	28.93	11
	Confidence	Sequence	Modifications	Qvality PEP	Qvality q-value	# Protein Groups	# Proteins	# PSMs	Master Protein Accessions	# Missed Cleavages	Theo. MH+ [Da]	Confidence (by Search Engine): Sequest HT	Percolator q-Value (by Search Engine): Sequest HT	Percolator PEP (by Search Engine): Sequest HT	XCorr (by Search Engine): Sequest HT
	High	SEKDEFVLHGENER		2.07118e-06	0	1	1	1	YNL248C	1	1688.79	High	0	6.884e-07	3.55
	High	LNSPPEILVDGILSR		0.000170022	0	1	1	3	YNL248C	0	1622.91	High	0	0.0001955	2.99
	High	APSDTTFDLYK		4.62507e-05	0	1	1	1	YNL248C	0	1257.6	High	0	1.917e-05	3.38
	High	DEFVLHGENER		0.0377343	0	1	1	2	YNL248C	0	1344.62	High	0	0.02565	1.58
	High	IDSDKLTDSAIDIVDSVR		0.00178713	0	1	1	1	YNL248C	1	1962	High	0	0.0009671	3.28
	High	KLDSLTQPSQMTK	1xOxidation [M11]	5.4921e-05	0	1	1	1	YNL248C	1	1492.77	High	0	2.31e-05	3.36
	High	SYFIDPQNEDK		0.053591	0.00120145	1	1	1	YNL248C	0	1355.61	High	0.0007987	0.0374	1.8
	High	GATVAQAEAFGIPK		0.0549951	0.00120145	1	1	1	YNL248C	0	1359.73	High	0.0007987	0.03846	1.81
	High	KSEKDEFVLHGENER		0.0582859	0.00120145	1	1	1	YNL248C	2	1816.88	High	0.0007987	0.04098	2.11
	High	AIADLER		0.0693402	0.0022289	1	1	1	YNL248C	0	787.431	High	0.001487	0.0492	1.79
	High	VLGAIVK		0.106061	0.00835654	1	1	1	YNL248C	0	699.476	High	0.005917	0.07811	1.8
High	Master Protein	YDR449C	UTP6 SGDID:S000002857, Chr IV from 1358902-1357580, Genome Release 64-2-1, reverse complement, Verified ORF, "Nucleolar protein; component of the small subunit (SSU) processome containing the U3 snoRNA that is involved in processing of pre-18S rRNA"	0	33.21	40	17	19	17	1	440	52.4	8.97	28.57	17
	Confidence	Sequence	Modifications	Qvality PEP	Qvality q-value	# Protein Groups	# Proteins	# PSMs	Master Protein Accessions	# Missed Cleavages	Theo. MH+ [Da]	Confidence (by Search Engine): Sequest HT	Percolator q-Value (by Search Engine): Sequest HT	Percolator PEP (by Search Engine): Sequest HT	XCorr (by Search Engine): Sequest HT
	High	NEVSLIMK		0.0382296	0	1	1	1	YDR449C	0	933.507	High	0	0.02599	1.41
	High	NEVSLIMK	1xOxidation [M7]	0.0224996	0	1	1	1	YDR449C	0	949.502	High	0	0.01471	2.42
	High	NDMYDLSLR	1xOxidation [M3]	0.00468808	0	1	1	1	YDR449C	0	1142.51	High	0	0.00273	2.5
	High	LNELPEADISVLGNAETNPALR		0.0154681	0	1	1	1	YDR449C	0	2336.21	High	0	0.009781	2.53
	High	ILDLIISK		0.00827033	0	1	1	1	YDR449C	0	914.592	High	0	0.00502	2.12
	High	VMGLINER	1xOxidation [M2]	0.0188426	0	1	1	1	YDR449C	0	947.498	High	0	0.0121	2.04
	High	YEYEVHANFK		0.0067404	0	1	1	1	YDR449C	0	1299.6	High	0	0.004033	2.11
	High	TNSLSDWSIQQR		0.0270353	0	1	1	1	YDR449C	0	1434.7	High	0	0.01786	1.67
	High	EQELDMQNEQK	1xOxidation [M6]	0.0199908	0	1	1	1	YDR449C	0	1407.61	High	0	0.0129	2.33
	High	FELNFITK		0.0237125	0	1	1	1	YDR449C	0	1011.55	High	0	0.01551	2
	High	GYYAISDSK		0.0077423	0	1	1	1	YDR449C	0	1003.47	High	0	0.004654	1.99
	High	GSSINDYIK		0.037489	0	1	1	1	YDR449C	0	996.5	High	0	0.0254	1.47
	High	LFDEFLDLER		0.0176435	0	1	1	1	YDR449C	0	1296.65	High	0	0.01129	2
	High	MNIELNK		0.0609764	0.0022289	1	1	1	YDR449C	0	861.45	High	0.001487	0.04303	2
	High	SHLQVPSTGDSMKDK	1xOxidation [M12]	0.0633777	0.0022289	1	1	1	YDR449C	1	1645.79	High	0.001487	0.04458	1.92
	High	MNIELNK	1xOxidation [M1]	0.0729852	0.00278092	1	1	1	YDR449C	0	877.445	High	0.00222	0.05199	1.47
	High	YINYESNVNK		0.104085	0.00835654	1	1	1	YDR449C	0	1243.6	High	0.005917	0.07629	1.49
	High	LWYEYVK		0.112199	0.0087043	1	1	1	YDR449C	0	1000.51	High	0.006158	0.08294	1.53
	High	LHPTNVDIWISCAK	1xCarbamidomethyl [C12]	0.110807	0.0087043	1	1	1	YDR449C	0	1653.84	High	0.006158	0.08196	2.85
High	Master Protein	YDL229W	SSB1 SGDID:S000002388, Chr IV from 44065-45906, Genome Release 64-2-1, Verified ORF, "Cytoplasmic ATPase that is a ribosome-associated molecular chaperone; functions with J-protein partner Zuo1p; may be involved in folding of newly-made polypeptide chains; member of the HSP70 family; interacts with phosphatase subunit Reg1p; SSB1 has a paralog, SSB2, that arose from the whole genome duplication"	0	31.511	23	13	14	12	1	613	66.6	5.44	25.02	13
	Confidence	Sequence	Modifications	Qvality PEP	Qvality q-value	# Protein Groups	# Proteins	# PSMs	Master Protein Accessions	# Missed Cleavages	Theo. MH+ [Da]	Confidence (by Search Engine): Sequest HT	Percolator q-Value (by Search Engine): Sequest HT	Percolator PEP (by Search Engine): Sequest HT	XCorr (by Search Engine): Sequest HT
	High	NTTVPTIK		0.042153	0	1	2	1	YDL229W	0	873.504	High	0	0.02885	1.76
	High	RFDDESVQK		0.0348923	0	1	2	1	YDL229W	1	1123.54	High	0	0.02346	2.5
	High	IINEPTAAAIAYGLGAGK		7.56377e-06	0	1	2	2	YDL229W	0	1729.95	High	0	2.765e-06	4.08
	High	LIGDAAK		0.0441164	0	4	7	1	YJL034W; YBL075C; YLL024C; YDL229W	0	687.404	High	0	0.03021	1.45
	High	SSNITISNAVGR		0.0067404	0	1	2	1	YDL229W	0	1218.64	High	0	0.004017	2.2
	High	STSGNTHLGGQDFDTNLLEHFK		7.79557e-05	0	1	2	1	YDL229W	0	2418.13	High	0	3.37e-05	2.72
	High	STLEPVEQVLK		0.0444041	0	1	2	1	YDL229W	0	1242.69	High	0	0.03055	2.27
	High	AADEAFAK		0.0111276	0	1	2	1	YDL229W	0	822.399	High	0	0.006875	2.14
	High	NTVFDAK		0.0499069	0.00120145	1	2	1	YDL229W	0	794.404	High	0.0007987	0.03465	1.5
	High	LLSDFFDGK		0.0582859	0.00120145	1	2	1	YDL229W	0	1041.53	High	0.0007987	0.04091	1.9
	High	LSSEEIEK		0.0542886	0.00120145	1	2	1	YDL229W	0	934.473	High	0.0007987	0.03779	1.5
	High	MVNQAEEFK		0.0662946	0.0022289	1	2	1	YDL229W	0	1095.51	High	0.001487	0.04683	1.84
	High	AVITVPAYFNDAQR		0.0667216	0.0022289	1	2	1	YDL229W	0	1564.81	High	0.001487	0.04731	1.33
High	Master Protein	IPI00376379 IPI:IPI00376379.1	SWISS-PROT:Q7Z794 REFSEQ_NP:NP_778253|ENSEMBL:ENSP00000342710 Tax_Id=9606 Keratin 1B	0	31.109	21	14	22	9	1	578	61.8	5.97	45.89	14
	Confidence	Sequence	Modifications	Qvality PEP	Qvality q-value	# Protein Groups	# Proteins	# PSMs	Master Protein Accessions	# Missed Cleavages	Theo. MH+ [Da]	Confidence (by Search Engine): Sequest HT	Percolator q-Value (by Search Engine): Sequest HT	Percolator PEP (by Search Engine): Sequest HT	XCorr (by Search Engine): Sequest HT
	High	QLLEGEESR		0.00453582	0	1	1	1	IPI00376379 IPI:IPI00376379.1	0	1060.53	High	0	0.002621	1.87
	High	LQDLEEALQQSK		0.0355824	0	1	1	1	IPI00376379 IPI:IPI00376379.1	0	1401.72	High	0	0.02409	2.18
	High	LQAEISNVK		0.0342153	0	1	1	1	IPI00376379 IPI:IPI00376379.1	0	1001.56	High	0	0.023	1.98
	High	LSLDVEIATYR		0.00202616	0	2	2	2	IPI00166205 IPI:IPI00166205.2; IPI00376379 IPI:IPI00376379.1	0	1279.69	High	0	0.014	2.65
	High	VDTLTGEVNFLK		0.0464698	0	1	1	1	IPI00376379 IPI:IPI00376379.1	0	1335.72	High	0	0.03191	1.85
	High	YQELQITAGR		0.0342153	0	1	1	1	IPI00376379 IPI:IPI00376379.1	0	1178.62	High	0	0.02305	1.96
	High	SMQDVVEDYK	1xOxidation [M2]	0.0187192	0	1	1	1	IPI00376379 IPI:IPI00376379.1	0	1229.54	High	0	0.01202	1.89
	High	TQYELIAQR		0.00582934	0	1	1	1	IPI00376379 IPI:IPI00376379.1	0	1121.59	High	0	0.003444	2.13
	High	FLEQQNQVLQTK		6.43603e-05	0	3	4	6	sp; IPI00376379 IPI:IPI00376379.1; IPI00556624 IPI:IPI00556624.1	0	1475.79	High	0	2.749e-05	4.09
	High	SLYNLGGSR		0.0586631	0.00120145	1	1	1	IPI00376379 IPI:IPI00376379.1	0	966.5	High	0.0007987	0.04106	1.56
	High	YEDEINK		0.0505579	0.00120145	7	16	1	IPI00290857 IPI:IPI00290857.1; IPI00300725 IPI:IPI00300725.6; sp; IPI00009867 IPI:IPI00009867.2; IPI00293665 IPI:IPI00293665.6; IPI00376379 IPI:IPI00376379.1; IPI00556624 IPI:IPI00556624.1	0	910.415	High	0.0007987	0.03516	1.59
	High	FASFIDK		0.052902	0.00120145	9	22	3	IPI00290078 IPI:IPI00290078.2; IPI00290857 IPI:IPI00290857.1; IPI00300725 IPI:IPI00300725.6; IPI00556242 IPI:IPI00556242.1; sp; IPI00009867 IPI:IPI00009867.2; IPI00329306 IPI:IPI00329306.2; IPI00293665 IPI:IPI00293665.6; IPI00376379 IPI:IPI00376379.1	0	827.43	High	0.003546	0.05897	2.12
	High	YEDEINKR		0.0877901	0.00571894	7	15	1	IPI00290857 IPI:IPI00290857.1; IPI00300725 IPI:IPI00300725.6; sp; IPI00009867 IPI:IPI00009867.2; IPI00293665 IPI:IPI00293665.6; IPI00376379 IPI:IPI00376379.1; IPI00556624 IPI:IPI00556624.1	1	1066.52	High	0.004177	0.06359	1.76
	High	SKYEDEINKR		0.109431	0.0087043	1	1	1	IPI00376379 IPI:IPI00376379.1	2	1281.64	High	0.006158	0.08092	2.13
High	Master Protein	YLR044C	PDC1 SGDID:S000004034, Chr XII from 234081-232390, Genome Release 64-2-1, reverse complement, Verified ORF, "Major of three pyruvate decarboxylase isozymes; key enzyme in alcoholic fermentation; decarboxylates pyruvate to acetaldehyde; involved in amino acid catabolism; subject to glucose-, ethanol-, and autoregulation; activated by phosphorylation in response to glucose levels; N-terminally prop…	0	30.754	26	12	15	12	1	563	61.5	6.19	34.92	12
	Confidence	Sequence	Modifications	Qvality PEP	Qvality q-value	# Protein Groups	# Proteins	# PSMs	Master Protein Accessions	# Missed Cleavages	Theo. MH+ [Da]	Confidence (by Search Engine): Sequest HT	Percolator q-Value (by Search Engine): Sequest HT	Percolator PEP (by Search Engine): Sequest HT	XCorr (by Search Engine): Sequest HT
	High	NPVILADACCSR	2xCarbamidomethyl [C9; C10]	0.00145614	0	1	1	1	YLR044C	0	1375.65	High	0	0.0007752	2.81
	High	NATFPGVQMK	1xOxidation [M9]	0.0103492	0	1	2	1	YLR044C	0	1108.55	High	0	0.006371	2.25
	High	LLTTIADAAK		0.00994777	0	1	1	1	YLR044C	0	1016.6	High	0	0.006125	2.09
	High	IYEVEGMR		0.0140136	0	1	1	1	YLR044C	0	996.482	High	0	0.008795	1.64
	High	LTAATNAK		0.00647869	0	1	1	3	YLR044C	0	789.446	High	0	0.00385	2.13
	High	VATTGEWDKLTQDK		0.0348923	0	1	1	1	YLR044C	1	1591.8	High	0	0.02358	2.81
	High	YGGVYVGTLSKPEVK		0.000713305	0	1	1	1	YLR044C	0	1596.86	High	0	0.0003625	3.45
	High	TPANAAVPASTPLK		0.000393537	0	1	1	1	YLR044C	0	1337.74	High	0	0.0001912	3.6
	High	KLIDLTQFPAFVTPMGK	1xOxidation [M15]	0.00334748	0	1	1	1	YLR044C	1	1922.05	High	0	0.001905	3.71
	High	GSIDEQHPR		0.00336966	0	1	2	2	YLR044C	0	1038.5	High	0	0.001916	2.36
	High	NIVEFHSDHMK	1xOxidation [M10]	0.0590427	0.00120145	1	1	1	YLR044C	0	1372.63	High	0.0007987	0.04141	1.81
	High	AQYNEIQGWDHLSLLPTFGAK		0.0777994	0.004336	1	1	1	YLR044C	0	2388.2	High	0.003264	0.05582	2.11
High	Master Protein	YNL175C	NOP13 SGDID:S000005119, Chr XIV from 308612-307401, Genome Release 64-2-1, reverse complement, Verified ORF, "Nucleolar protein found in preribosomal complexes; contains an RNA recognition motif (RRM); relative distribution to the nucleolus increases upon DNA replication stress"	0	29.292	37	15	15	15	1	403	45.6	9.29	31.28	15
	Confidence	Sequence	Modifications	Qvality PEP	Qvality q-value	# Protein Groups	# Proteins	# PSMs	Master Protein Accessions	# Missed Cleavages	Theo. MH+ [Da]	Confidence (by Search Engine): Sequest HT	Percolator q-Value (by Search Engine): Sequest HT	Percolator PEP (by Search Engine): Sequest HT	XCorr (by Search Engine): Sequest HT
	High	NNSSSFDISNNK		0.00209421	0	1	1	1	YNL175C	0	1326.59	High	0	0.00115	2.57
	High	SSIPLSK		0.0365235	0	1	1	1	YNL175C	0	731.43	High	0	0.02474	2.02
	High	SSVALATAQR		0.000147991	0	1	1	1	YNL175C	0	1003.55	High	0	6.674e-05	2.96
	High	SIEEYKEDAEK		0.0196006	0	1	1	1	YNL175C	1	1340.62	High	0	0.01265	2.49
	High	ALLDPTK		0.0331157	0	1	1	1	YNL175C	0	757.445	High	0	0.02222	2.22
	High	DAQGEESTINTPTGDESGEVVKK		0.00182291	0	1	1	1	YNL175C	1	2391.12	High	0	0.0009872	2.87
	High	DAQGEESTINTPTGDESGEVVK		0.00805494	0	1	1	1	YNL175C	0	2263.02	High	0	0.004868	2.78
	High	AVLELSESHLNGR		0.00364761	0	1	1	1	YNL175C	0	1424.75	High	0	0.002087	2.66
	High	KAEDEIEIDLK		0.0486293	0.000644996	1	1	1	YNL175C	1	1302.68	High	0.0007987	0.03359	2.43
	High	VTLEELNAK		0.0512171	0.00120145	1	1	1	YNL175C	0	1016.56	High	0.0007987	0.03556	2.18
	High	NEEGSTNALK		0.0539387	0.00120145	1	1	1	YNL175C	0	1062.51	High	0.0007987	0.03756	2.2
	High	VTEQDITR		0.0823893	0.00476234	1	1	1	YNL175C	0	961.495	High	0.003546	0.05924	1.72
	High	MATFEDSGK	1xOxidation [M1]	0.0818669	0.00476234	1	1	1	YNL175C	0	1001.42	High	0.003546	0.05914	1.49
	High	GSAAIVPSQGK		0.106727	0.00835654	1	1	1	YNL175C	0	1014.56	High	0.005917	0.07844	2.18
	High	MEYGEDR		0.105398	0.00835654	1	1	1	YNL175C	0	899.356	High	0.005917	0.07732	1.25
High	Master Protein	YBR127C	VMA2 SGDID:S000000331, Chr II from 492822-491269, Genome Release 64-2-1, reverse complement, Verified ORF, "Subunit B of V1 peripheral membrane domain of vacuolar H+-ATPase; an electrogenic proton pump found throughout the endomembrane system; contains nucleotide binding sites; also detected in the cytoplasm; protein abundance increases in response to DNA replication stress"	0	28.886	22	11	11	11	1	517	57.7	5.07	25.94	11
	Confidence	Sequence	Modifications	Qvality PEP	Qvality q-value	# Protein Groups	# Proteins	# PSMs	Master Protein Accessions	# Missed Cleavages	Theo. MH+ [Da]	Confidence (by Search Engine): Sequest HT	Percolator q-Value (by Search Engine): Sequest HT	Percolator PEP (by Search Engine): Sequest HT	XCorr (by Search Engine): Sequest HT
	High	QAGLVRPTK		0.0159856	0	1	1	1	YBR127C	0	969.584	High	0	0.0102	2.75
	High	TTVEFTGESLR		0.0109818	0	1	1	1	YBR127C	0	1239.62	High	0	0.006773	2.48
	High	TSLFLNLANDPTIER		0.000191498	0	1	1	1	YBR127C	0	1703.9	High	0	8.807e-05	3.1
	High	TFITQGAYEDR		0.0418796	0	1	1	1	YBR127C	0	1300.62	High	0	0.0286	1.55
	High	DDADEDEEDPDTR		0.00724791	0	1	1	1	YBR127C	0	1521.55	High	0	0.004333	2.36
	High	DHGDVSNQLYAK		0.0467725	0	1	1	1	YBR127C	0	1346.63	High	0	0.03228	1.62
	High	ARDDADEDEEDPDTR		0.000620881	0	1	1	1	YBR127C	1	1748.68	High	0	0.0003115	3.35
	High	AVVGEEALSIEDK		0.00389665	0	1	1	1	YBR127C	0	1359.7	High	0	0.002231	2.66
	High	AVEQGFNVKPR		0.00135406	0	1	1	1	YBR127C	0	1244.67	High	0	0.0007203	2.2
	High	KDHGDVSNQLYAK		0.00710583	0	1	1	1	YBR127C	1	1474.73	High	0	0.004253	3.28
	High	GIYPPINVLPSLSR		0.000505874	0	1	1	1	YBR127C	0	1525.87	High	0	0.0002509	2.14
High	Master Protein	sp	TRYP_PIG	0	28.772	29	5	45	5	1	231	24.4	7.18	129.86	5
	Confidence	Sequence	Modifications	Qvality PEP	Qvality q-value	# Protein Groups	# Proteins	# PSMs	Master Protein Accessions	# Missed Cleavages	Theo. MH+ [Da]	Confidence (by Search Engine): Sequest HT	Percolator q-Value (by Search Engine): Sequest HT	Percolator PEP (by Search Engine): Sequest HT	XCorr (by Search Engine): Sequest HT
	High	IITHPNFNGNTLDNDIMLIK		0.0198599	0	1	1	1	sp	0	2283.18	High	0	0.01283	2.55
	High	IITHPNFNGNTLDNDIMLIK	1xOxidation [M17]	6.66527e-08	0	1	1	4	sp	0	2299.18	High	0	1.725e-08	5.78
	High	LGEHNIDVLEGNEQFINAAK		1.13736e-09	0	1	1	20	sp	0	2211.1	High	0	1.11e-09	6.82
	High	LSSPATLNSR		0.00419026	0	1	1	8	sp	0	1045.56	High	0	0.005413	2.5
	High	VATVSLPR		0.0167391	0	1	1	11	sp	0	842.509	High	0	0.01207	2.1
	High	NKPGVYTK		0.0743988	0.00332055	1	2	1	sp	0	906.504	High	0.002933	0.05327	1.43
High	Master Protein	YHR214C-B	YHR214C-B SGDID:S000003534, Chr VIII from 547929-543964,549346-547931, Genome Release 64-2-1, reverse complement, transposable_element_gene, "Retrotransposon TYA Gag and TYB Pol genes; transcribed/translated as one unit; polyprotein is processed to make a nucleocapsid-like protein (Gag), reverse transcriptase (RT), protease (PR), and integrase (IN); similar to retroviral genes; YHR214C-B has a pa…	0	28.675	5	8	12	7	1	1793	202.7	8.32	24.4	8
	Confidence	Sequence	Modifications	Qvality PEP	Qvality q-value	# Protein Groups	# Proteins	# PSMs	Master Protein Accessions	# Missed Cleavages	Theo. MH+ [Da]	Confidence (by Search Engine): Sequest HT	Percolator q-Value (by Search Engine): Sequest HT	Percolator PEP (by Search Engine): Sequest HT	XCorr (by Search Engine): Sequest HT
	High	LNNNGIHINNK		0.00975292	0	1	44	1	YHR214C-B	0	1250.66	High	0	0.005977	2.87
	High	VACQLIMR	1xCarbamidomethyl [C3]	0.0232503	0	1	44	1	YHR214C-B	0	990.522	High	0	0.01524	1.55
	High	YVRPPPMLTSPNDFPNWVK	1xOxidation [M7]	0.000841435	0	1	42	1	YHR214C-B	0	2274.14	High	0	0.0004313	3.82
	High	SYTNTTKPK		0.00397462	0	1	44	2	YHR214C-B	0	1039.54	High	0	0.002276	1.53
	High	EVHTNQDPLDVSASK		7.15382e-05	0	1	46	2	YHR214C-B	0	1639.79	High	0	3.059e-05	3.95
	High	DILSVDYTDIMK	1xOxidation [M11]	0.00228203	0	2	49	1	YHR214C-B; YBL005W-B	0	1428.69	High	0	0.001263	2.37
	High	DILSVDYTDIMK		0.0235574	0	2	49	1	YHR214C-B; YBL005W-B	0	1412.7	High	0	0.01539	1.94
	High	KYVRPPPMLTSPNDFPNWVK	1xOxidation [M8]	0.0461691	0	1	42	1	YHR214C-B	1	2402.23	High	0	0.0318	2.85
	High	VTNIIDR		0.0508865	0.00120145	1	42	1	YHR214C-B	0	830.473	High	0.0007987	0.03538	2.27
	High	VACQLIMR	1xCarbamidomethyl [C3]; 1xOxidation [M7]	0.0522217	0.00120145	1	44	1	YHR214C-B	0	1006.52	High	0.0007987	0.03641	1.85
High	Master Protein	YGL055W	OLE1 SGDID:S000003023, Chr VII from 398628-400160, Genome Release 64-2-1, Verified ORF, "Delta(9) fatty acid desaturase; required for monounsaturated fatty acid synthesis and for normal distribution of mitochondria"	0	28.605	21	10	11	10	1	510	58.4	8.95	25.3	10
	Confidence	Sequence	Modifications	Qvality PEP	Qvality q-value	# Protein Groups	# Proteins	# PSMs	Master Protein Accessions	# Missed Cleavages	Theo. MH+ [Da]	Confidence (by Search Engine): Sequest HT	Percolator q-Value (by Search Engine): Sequest HT	Percolator PEP (by Search Engine): Sequest HT	XCorr (by Search Engine): Sequest HT
	High	LLEKDNQEKEEAK		0.0298257	0	1	1	1	YGL055W	2	1573.81	High	0	0.01982	2.45
	High	WYQYDPTK		0.0141062	0	1	1	1	YGL055W	0	1100.5	High	0	0.008895	1.95
	High	EMVSVEFDKK	1xOxidation [M2]	0.00660825	0	1	1	1	YGL055W	1	1227.59	High	0	0.003931	2.96
	High	EMVSVEFDK	1xOxidation [M2]	0.012529	0	1	1	1	YGL055W	0	1099.5	High	0	0.007814	1.93
	High	FSQNAIEEALIQQEQK		0.000713305	0	1	1	2	YGL055W	0	1875.94	High	0	0.0003621	3.2
	High	ADITDMTDDWTIR	1xOxidation [M6]	0.00263901	0	1	1	1	YGL055W	0	1568.69	High	0	0.001466	1.84
	High	AFSGGVYR		0.0256542	0	1	1	1	YGL055W	0	856.431	High	0	0.01689	1.82
	High	HSNAAQNVLADMR		0.00108161	0	1	1	1	YGL055W	0	1426.69	High	0	0.0005656	2.87
	High	KFSQNAIEEALIQQEQK		4.38691e-05	0	1	1	1	YGL055W	1	2004.04	High	0	1.819e-05	4.36
	High	GLVIISGIVHDVSGYISEHPGGETLIK		0.00943658	0	1	1	1	YGL055W	0	2790.5	High	0	0.005752	1.7
High	Master Protein	YOR375C	GDH1 SGDID:S000005902, Chr XV from 1043042-1041678, Genome Release 64-2-1, reverse complement, Verified ORF, "NADP(+)-dependent glutamate dehydrogenase; synthesizes glutamate from ammonia and alpha-ketoglutarate; rate of alpha-ketoglutarate utilization differs from Gdh3p; expression regulated by nitrogen and carbon sources; GDH1 has a paralog, GDH3, that arose from the whole genome duplication"	0	28.125	35	12	13	12	1	454	49.5	5.69	19.13	12
	Confidence	Sequence	Modifications	Qvality PEP	Qvality q-value	# Protein Groups	# Proteins	# PSMs	Master Protein Accessions	# Missed Cleavages	Theo. MH+ [Da]	Confidence (by Search Engine): Sequest HT	Percolator q-Value (by Search Engine): Sequest HT	Percolator PEP (by Search Engine): Sequest HT	XCorr (by Search Engine): Sequest HT
	High	NSLTGLDMGGGK	1xOxidation [M8]	0.0294378	0	1	1	1	YOR375C	0	1165.55	High	0	0.01962	1.66
	High	VIELGGTVVSLSDSK		0.00283791	0	1	1	1	YOR375C	0	1503.83	High	0	0.001595	2.3
	High	VTISGSGNVAQYAALK		0.00866118	0	1	2	1	YOR375C	0	1578.85	High	0	0.005247	3.04
	High	STATGPSEAVWYGPPK		8.43137e-07	0	1	1	1	YOR375C	0	1647.8	High	0	2.614e-07	2.83
	High	FIAEGSNMGSTPEAIAVFETAR	1xOxidation [M8]	0.00400096	0	1	1	1	YOR375C	0	2314.1	High	0	0.002296	1.98
	High	GANIASFIK		0.0197298	0	1	1	1	YOR375C	0	920.52	High	0	0.01277	2.72
	High	ALVAQGVK		0.0223524	0	1	1	1	YOR375C	0	785.488	High	0	0.01455	1.58
	High	AANLGGVAVSGLEMAQNSQR	1xOxidation [M14]	0.0310198	0	1	1	2	YOR375C	0	1988.98	High	0.007051	0.08536	2.36
	High	HIGQDTDVPAGDIGVGGR		0.037489	0	1	1	1	YOR375C	0	1763.87	High	0	0.02531	1.97
	High	GGLCVDLK	1xCarbamidomethyl [C4]	0.0446936	0	1	2	1	YOR375C	0	861.45	High	0	0.0307	1.34
	High	VLPIVSVPER		0.0571683	0.00120145	1	2	1	YOR375C	0	1108.67	High	0.0007987	0.04005	1.97
	High	VLPSLVK		0.101504	0.00835654	1	1	1	YOR375C	0	755.503	High	0.005917	0.07438	1.09
High	Master Protein	YLL048C	YBT1 SGDID:S000003971, Chr XII from 46265-41280, Genome Release 64-2-1, reverse complement, Verified ORF, "Transporter of the ATP-binding cassette (ABC) family; involved in bile acid transport; negative regulator of vacuole fusion; regulates release of lumenal Ca2+ stores; similar to mammalian bile transporters; YBT1 has a paralog, VMR1, that arose from the whole genome duplication"	0	27.489	10	13	14	13	1	1661	189	8.09	24.57	13
	Confidence	Sequence	Modifications	Qvality PEP	Qvality q-value	# Protein Groups	# Proteins	# PSMs	Master Protein Accessions	# Missed Cleavages	Theo. MH+ [Da]	Confidence (by Search Engine): Sequest HT	Percolator q-Value (by Search Engine): Sequest HT	Percolator PEP (by Search Engine): Sequest HT	XCorr (by Search Engine): Sequest HT
	High	SPIYQHFSETLVGVTTIR		0.00240588	0	1	1	1	YLL048C	0	2048.08	High	0	0.001333	3.57
	High	SITIIPQDPTLFSGTIK		0.00931293	0	1	1	1	YLL048C	0	1831.02	High	0	0.005707	1.74
	High	EFQGSTILTIAHR		0.000608694	0	1	1	1	YLL048C	0	1472.79	High	0	0.0003053	2.56
	High	FLDLSSEISEGGSNLSQGQR		0.0174129	0	1	1	1	YLL048C	0	2124.02	High	0	0.01114	3.3
	High	ETSNEASSTNSENVNK		0.00968881	0	1	1	1	YLL048C	0	1710.74	High	0	0.005951	1.88
	High	EYDHPYSLLLNK		0.0223524	0	1	1	1	YLL048C	0	1491.75	High	0	0.0146	1.93
	High	AFGDEGR		0.0446936	0	1	1	1	YLL048C	0	751.337	High	0	0.03064	1.48
	High	IDNIDISGVDLQR		4.50442e-05	0	1	1	1	YLL048C	0	1457.76	High	0	1.866e-05	3.68
	High	ILVMDAGEVK	1xOxidation [M4]	0.0495845	0.00120145	1	2	4	YLL048C	0	1090.58	High	0.0007987	0.03439	2.13
	High	QIFEALK		0.0532454	0.00120145	1	1	1	YLL048C	0	848.488	High	0.0007987	0.03694	1.61
	High	TNLDPYDEFSDR		0.0654483	0.0022289	1	1	1	YLL048C	0	1471.63	High	0.001487	0.04641	2.19
	High	QLMCLAR	1xCarbamidomethyl [C4]; 1xOxidation [M3]	0.0872353	0.00522949	1	1	1	YLL048C	0	907.449	High	0.003855	0.06304	1.22
	High	IQETIR		0.0935239	0.00669635	1	2	1	YLL048C	0	759.436	High	0.004826	0.06786	1.43
High	Master Protein	YER025W	GCD11 SGDID:S000000827, Chr V from 205251-206834, Genome Release 64-2-1, Verified ORF, "Gamma subunit of the translation initiation factor eIF2; involved in the identification of the start codon; binds GTP when forming the ternary complex with GTP and tRNAi-Met; mutations in human ortholog cause X-linked intellectual disability (XLID)"	0	26.994	32	13	13	13	1	527	57.8	6.8	23.45	13
	Confidence	Sequence	Modifications	Qvality PEP	Qvality q-value	# Protein Groups	# Proteins	# PSMs	Master Protein Accessions	# Missed Cleavages	Theo. MH+ [Da]	Confidence (by Search Engine): Sequest HT	Percolator q-Value (by Search Engine): Sequest HT	Percolator PEP (by Search Engine): Sequest HT	XCorr (by Search Engine): Sequest HT
	High	QATINIGTIGHVAHGK		0.00231238	0	1	1	1	YER025W	0	1616.89	High	0	0.00128	2.81
	High	SFDVNKPGAEIEDLK		0.0259928	0	1	1	1	YER025W	0	1661.84	High	0	0.01717	1.83
	High	LGDEIEIRPGIVTK		4.21637e-05	0	1	1	1	YER025W	0	1539.87	High	0	1.741e-05	4.01
	High	LVGQVVGAK		0.00556608	0	1	1	1	YER025W	0	870.541	High	0	0.003266	1.69
	High	HVIILQNK		0.0112752	0	1	1	1	YER025W	0	964.594	High	0	0.006986	2.22
	High	KLEPNEVLMVNIGSTATGAR	1xOxidation [M9]	0.00507466	0	1	1	1	YER025W	1	2116.11	High	0	0.002962	2.8
	High	GGVAGGSILNGVFK		0.00332544	0	1	1	1	YER025W	0	1275.71	High	0	0.001884	2.83
	High	YNIDAVNEFIVK		0.0522217	0.00120145	1	1	1	YER025W	0	1424.74	High	0.0007987	0.03628	1.78
	High	LNPLSAEIINR		0.0613705	0.0022289	1	1	1	YER025W	0	1239.71	High	0.001487	0.04313	2.01
	High	LGYANAK		0.0734535	0.00332055	1	1	1	YER025W	0	736.399	High	0.00222	0.05261	1.33
	High	FAVPGGLIGVGTK		0.0739247	0.00332055	1	1	1	YER025W	0	1215.71	High	0.002587	0.05274	1.6
	High	CQEPTCPEPDCYR	3xCarbamidomethyl [C1; C6; C11]	0.0793017	0.00476234	1	1	1	YER025W	0	1711.65	High	0.003546	0.05679	1.69
	High	VAFTGLEEDGETEEEK		0.114317	0.00917297	1	1	1	YER025W	0	1782.79	High	0.006466	0.08448	1.29
High	Master Protein	YHR007C	ERG11 SGDID:S000001049, Chr VIII from 121683-120091, Genome Release 64-2-1, reverse complement, Verified ORF, "Lanosterol 14-alpha-demethylase; catalyzes the C-14 demethylation of lanosterol to form 4,4''-dimethyl cholesta-8,14,24-triene-3-beta-ol in the ergosterol biosynthesis pathway; member of the cytochrome P450 family; associated and coordinately regulated with the P450 reductase Ncp1p"	0	25.593	32	12	12	12	1	530	60.7	8.66	25.74	12
	Confidence	Sequence	Modifications	Qvality PEP	Qvality q-value	# Protein Groups	# Proteins	# PSMs	Master Protein Accessions	# Missed Cleavages	Theo. MH+ [Da]	Confidence (by Search Engine): Sequest HT	Percolator q-Value (by Search Engine): Sequest HT	Percolator PEP (by Search Engine): Sequest HT	XCorr (by Search Engine): Sequest HT
	High	TVPPPDFTSMVTLPTGPAK	1xOxidation [M10]	0.00245404	0	1	1	1	YHR007C	0	1972.01	High	0	0.001358	2.56
	High	VMTVYLGPK	1xOxidation [M2]	0.0171854	0	1	1	1	YHR007C	0	1023.55	High	0	0.01101	1.96
	High	AISGTYMSLIK	1xOxidation [M7]	0.00419026	0	1	1	1	YHR007C	0	1199.63	High	0	0.002409	2.5
	High	DEYFPNAHQFNIHR		0.00148529	0	1	1	1	YHR007C	0	1787.82	High	0	0.0007956	2.7
	High	GVSSPYLPFGGGR		0.0355824	0	1	1	1	YHR007C	0	1293.66	High	0	0.02394	1.57
	High	GVIYDCPNSR	1xCarbamidomethyl [C6]	0.037489	0	1	1	1	YHR007C	0	1180.54	High	0	0.02532	1.6
	High	LADVSAEAAYAHLTTPVFGK		0.000117432	0	1	1	1	YHR007C	0	2061.07	High	0	5.208e-05	3.35
	High	GHEFVFNAK		0.0355824	0	1	1	1	YHR007C	0	1048.52	High	0	0.02409	2.67
	High	GFTPINFVFPNLPLEHYR		0.0202553	0	1	1	1	YHR007C	0	2161.12	High	0	0.0131	2.34
	High	SYVPLIAEEVYK		0.0492641	0.00120145	1	1	1	YHR007C	0	1410.75	High	0.0007987	0.0342	1.69
	High	NNDIQDR		0.0637867	0.0022289	1	1	1	YHR007C	0	874.401	High	0.001487	0.0449	1.72
	High	DMHVPNTSYVIPAGYHVLVSPGYTHLR	1xOxidation [M2]	0.0808315	0.00476234	1	1	1	YHR007C	0	3039.51	High	0.003546	0.05819	2.65
High	Master Protein	YHR216W	IMD2 SGDID:S000001259, Chr VIII from 554396-555967, Genome Release 64-2-1, Verified ORF, "Inosine monophosphate dehydrogenase; catalyzes the rate-limiting step in GTP biosynthesis, expression is induced by mycophenolic acid resulting in resistance to the drug, expression is repressed by nutrient limitation; IMD2 has a paralog, YAR073W/YAR075W, that arose from a segmental duplication"	0	25.361	19	7	10	1	1	523	56.5	8.48	25.11	7
	Confidence	Sequence	Modifications	Qvality PEP	Qvality q-value	# Protein Groups	# Proteins	# PSMs	Master Protein Accessions	# Missed Cleavages	Theo. MH+ [Da]	Confidence (by Search Engine): Sequest HT	Percolator q-Value (by Search Engine): Sequest HT	Percolator PEP (by Search Engine): Sequest HT	XCorr (by Search Engine): Sequest HT
	High	NQNYPLASK		0.00614546	0	3	3	1	YLR432W; YML056C; YHR216W	0	1034.53	High	0	0.003645	2.14
	High	NPVTGAQGITLSEGNEILK		0.00913048	0	2	3	1	YLR432W; YHR216W	0	1941.03	High	0	0.005553	1.03
	High	YFSESDSVLVAQGVSGAVVDK		0.00116315	0	3	4	1	YLR432W; YML056C; YHR216W	0	2157.07	High	0	0.0006129	3.77
	High	TASAQLEGGVHNLHSYEK		6.60843e-05	0	3	3	2	YLR432W; YML056C; YHR216W	0	1940.95	High	0	5.391e-05	3.56
	High	EQAANLIAAGADGLR		0.00293321	0	3	4	2	YLR432W; YML056C; YHR216W	0	1469.77	High	0	0.001653	3.25
	High	GMGSIDAMQK	2xOxidation [M2; M8]	0.00424597	0	3	4	2	YLR432W; YML056C; YHR216W	0	1069.47	High	0	0.002449	2.29
	High	GNLVSMLSR	1xOxidation [M6]	0.0923497	0.00669635	1	2	1	YHR216W	0	992.519	High	0.004826	0.06699	1.84
High	Master Protein	YOR198C	BFR1 SGDID:S000005724, Chr XV from 720065-718653, Genome Release 64-2-1, reverse complement, Verified ORF, "Component of mRNP complexes associated with polyribosomes; involved in localization of mRNAs to P bodies; implicated in secretion and nuclear segregation; multicopy suppressor of BFA (Brefeldin A) sensitivity"	0	24.919	23	11	11	11	1	470	54.6	9.19	21.91	11
	Confidence	Sequence	Modifications	Qvality PEP	Qvality q-value	# Protein Groups	# Proteins	# PSMs	Master Protein Accessions	# Missed Cleavages	Theo. MH+ [Da]	Confidence (by Search Engine): Sequest HT	Percolator q-Value (by Search Engine): Sequest HT	Percolator PEP (by Search Engine): Sequest HT	XCorr (by Search Engine): Sequest HT
	High	NTENEQPASIFNK		0.00424597	0	1	1	1	YOR198C	0	1491.71	High	0	0.002449	2.78
	High	QIDQHQVNDTTQQER		0.000215686	0	1	1	1	YOR198C	0	1839.86	High	0	9.987e-05	3.04
	High	LNLDYSNK		0.012123	0	1	1	1	YOR198C	0	966.489	High	0	0.007533	1.96
	High	ITVEQLK		0.0251545	0	1	1	1	YOR198C	0	830.498	High	0	0.01653	2.07
	High	VVADDLVLVTPK		0.00127589	0	1	1	1	YOR198C	0	1268.75	High	0	0.0006723	2.51
	High	FSSTAEAK		0.0220608	0	1	1	1	YOR198C	0	840.41	High	0	0.01441	1.44
	High	DLVNIEPIR		0.026509	0	1	1	1	YOR198C	0	1068.6	High	0	0.01753	1.71
	High	KRDELYSQIR		0.0166293	0	1	1	1	YOR198C	2	1307.71	High	0	0.01063	3.24
	High	KDDFVNVAPSK		0.000798109	0	1	1	1	YOR198C	1	1219.63	High	0	0.0004072	2.77
	High	QLDAQIK		0.0911893	0.00669635	1	1	1	YOR198C	0	815.462	High	0.004826	0.06645	1.45
	High	QNIESVEK		0.110117	0.0087043	1	1	1	YOR198C	0	946.484	High	0.006158	0.08108	1.83
High	Master Protein	YER043C	SAH1 SGDID:S000000845, Chr V from 237119-235770, Genome Release 64-2-1, reverse complement, Verified ORF, "S-adenosyl-L-homocysteine hydrolase; catabolizes S-adenosyl-L-homocysteine which is formed after donation of the activated methyl group of S-adenosyl-L-methionine (AdoMet) to an acceptor; regulates cellular lipid homoeostasis by regulating phosphatidylcholine(PC)synthesis and triacylglycerol…	0	24.694	20	9	10	9	1	449	49.1	6.24	23.65	9
	Confidence	Sequence	Modifications	Qvality PEP	Qvality q-value	# Protein Groups	# Proteins	# PSMs	Master Protein Accessions	# Missed Cleavages	Theo. MH+ [Da]	Confidence (by Search Engine): Sequest HT	Percolator q-Value (by Search Engine): Sequest HT	Percolator PEP (by Search Engine): Sequest HT	XCorr (by Search Engine): Sequest HT
	High	LNLILDDGGDLTTLVHEK		0.0467725	0	1	1	1	YER043C	0	1966.05	High	0	0.03227	2.29
	High	ILDEAVAK		0.0161973	0	1	1	1	YER043C	0	858.493	High	0	0.01031	2.02
	High	VAVVAGYGDVGK		0.00067212	0	1	1	1	YER043C	0	1134.62	High	0	0.000338	2.91
	High	VPAINVNDSVTK		0.00150505	0	1	1	1	YER043C	0	1256.68	High	0	0.0008045	2.55
	High	TGPFEVGVHVLPK		0.00046423	0	1	1	2	YER043C	0	1379.77	High	0	0.009149	2.46
	High	GCAAALR	1xCarbamidomethyl [C2]	0.0230982	0	1	1	1	YER043C	0	718.366	High	0	0.01511	1.72
	High	ATDVMLAGK	1xOxidation [M5]	0.00435962	0	1	1	1	YER043C	0	921.471	High	0	0.002519	2.06
	High	IADISLAAFGR		0.00112535	0	1	1	1	YER043C	0	1133.63	High	0	0.0005885	2.41
	High	LKVPAINVNDSVTK		0.0675838	0.0022289	1	1	1	YER043C	1	1497.86	High	0.001487	0.04783	2.84
High	Master Protein	YGL097W	SRM1 SGDID:S000003065, Chr VII from 321782-323230, Genome Release 64-2-1, Verified ORF, "Nucleotide exchange factor for Gsp1p; localizes to the nucleus, required for nucleocytoplasmic trafficking of macromolecules; suppressor of the pheromone response pathway; potentially phosphorylated by Cdc28p"	0	24.68	29	13	15	13	1	482	53	6.1	24.84	13
	Confidence	Sequence	Modifications	Qvality PEP	Qvality q-value	# Protein Groups	# Proteins	# PSMs	Master Protein Accessions	# Missed Cleavages	Theo. MH+ [Da]	Confidence (by Search Engine): Sequest HT	Percolator q-Value (by Search Engine): Sequest HT	Percolator PEP (by Search Engine): Sequest HT	XCorr (by Search Engine): Sequest HT
	High	NTATQDHNIILVGCGGQFSVSGGVK	1xCarbamidomethyl [C14]	0.0320509	0	1	1	1	YGL097W	0	2559.26	High	0	0.02146	1.87
	High	LSDEDAEK		0.0312234	0	1	1	2	YGL097W	0	906.405	High	0	0.02237	1.74
	High	LSDEDAEKR		0.0480025	0	1	1	1	YGL097W	1	1062.51	High	0	0.03307	1.47
	High	YNIVQLAPGK		0.0298257	0	1	1	1	YGL097W	0	1102.63	High	0	0.01986	1.99
	High	SIAAGEHHSLILSQDGDLYSCGR	1xCarbamidomethyl [C21]	0.00270967	0	1	1	1	YGL097W	0	2486.17	High	0	0.001511	4
	High	THASHIINAQEDYK		0.0432642	0	1	1	1	YGL097W	0	1626.79	High	0	0.0297	2.79
	High	CNEGILGFYQDK	1xCarbamidomethyl [C1]	0.0246645	0	1	1	1	YGL097W	0	1443.66	High	0	0.0162	2.16
	High	LDMFEVGIPK	1xOxidation [M3]	0.00556608	0	1	1	1	YGL097W	0	1164.6	High	0	0.003269	2.45
	High	LDMFEVGIPK		0.00158674	0	1	1	1	YGL097W	0	1148.6	High	0	0.0008506	2.43
	High	LALPDNVVIR		0.0418796	0	1	1	1	YGL097W	0	1109.67	High	0	0.02858	1.94
	High	DNLPEYTYK		0.065029	0.0022289	1	1	1	YGL097W	0	1142.54	High	0.001487	0.04592	1.77
	High	LNNVPK		0.0782971	0.004336	1	1	1	YGL097W	0	684.404	High	0.003264	0.0563	1.89
	High	AVPLPTK		0.0818669	0.00476234	1	1	1	YGL097W	0	725.456	High	0.003546	0.05903	1.69
	High	VPTFSK		0.109431	0.0087043	1	1	1	YGL097W	0	678.382	High	0.006158	0.08074	1.48
High	Master Protein	YKR039W	GAP1 SGDID:S000001747, Chr XI from 515063-516871, Genome Release 64-2-1, Verified ORF, "General amino acid permease; Gap1p senses the presence of amino acid substrates to regulate localization to the plasma membrane when needed; essential for invasive growth"	0	24.357	14	9	12	9	1	602	65.6	8.47	25.94	9
	Confidence	Sequence	Modifications	Qvality PEP	Qvality q-value	# Protein Groups	# Proteins	# PSMs	Master Protein Accessions	# Missed Cleavages	Theo. MH+ [Da]	Confidence (by Search Engine): Sequest HT	Percolator q-Value (by Search Engine): Sequest HT	Percolator PEP (by Search Engine): Sequest HT	XCorr (by Search Engine): Sequest HT
	High	VKPIEVDPNLSEAEK		0.00132749	0	1	1	2	YKR039W	0	1667.89	High	0	0.0007016	3.97
	High	VAIITAQTPLK		0.00188413	0	1	1	1	YKR039W	0	1154.71	High	0	0.001021	2.71
	High	SLIGASSVDAAASPFVIAIK		0.00215029	0	1	1	1	YKR039W	0	1917.07	High	0	0.001184	3.42
	High	TMVALAEQR	1xOxidation [M2]	0.0237125	0	1	1	1	YKR039W	0	1034.53	High	0	0.01548	1.89
	High	TMVALAEQR		0.0153666	0	1	1	1	YKR039W	0	1018.53	High	0	0.009715	1.85
	High	EVDLDLLKQEIAEEK		0.0021789	0	1	1	2	YKR039W	1	1771.93	High	0	0.001198	3.55
	High	EVDLDLLK		0.00925171	0	1	1	1	YKR039W	0	944.53	High	0	0.00566	2.32
	High	MDIDTGR	1xOxidation [M1]	0.0586631	0.00120145	1	1	1	YKR039W	0	823.361	High	0.0007987	0.0411	1.58
	High	LFIPAEK		0.0693402	0.0022289	1	1	1	YKR039W	0	817.482	High	0.001487	0.04919	1.89
	High	QEIAEEK		0.112901	0.0087043	1	1	1	YKR039W	0	846.42	High	0.006158	0.08346	1.95
High	Master Protein	YOL041C	NOP12 SGDID:S000005401, Chr XV from 252646-251267, Genome Release 64-2-1, reverse complement, Verified ORF, "Nucleolar protein involved in pre-25S rRNA processing; also involved in biogenesis of large 60S ribosomal subunit; contains an RNA recognition motif (RRM); binds to Ebp2; similar to Nop13p and Nsr1p"	0	23.641	21	8	9	8	1	459	51.9	9.44	14.53	8
	Confidence	Sequence	Modifications	Qvality PEP	Qvality q-value	# Protein Groups	# Proteins	# PSMs	Master Protein Accessions	# Missed Cleavages	Theo. MH+ [Da]	Confidence (by Search Engine): Sequest HT	Percolator q-Value (by Search Engine): Sequest HT	Percolator PEP (by Search Engine): Sequest HT	XCorr (by Search Engine): Sequest HT
	High	NDEDEDLEAR		0.00150505	0	1	1	1	YOL041C	0	1205.49	High	0	0.0008081	2.01
	High	LLNEEAEAEDDKPTVTK		0.0136492	0	1	1	1	YOL041C	0	1901.93	High	0	0.008563	2.29
	High	VDSVAHPAPHDK		0.00206672	0	1	1	2	YOL041C	0	1272.63	High	0.003855	0.06231	1.97
	High	TDETSVPLTSAAK		9.5953e-06	0	1	1	1	YOL041C	0	1319.67	High	0	3.561e-06	3.66
	High	EASKPDVSDEQTEEVALPK		3.94674e-05	0	1	1	1	YOL041C	0	2072	High	0	1.617e-05	3.22
	High	GFAYVQFK		0.0387312	0	1	1	1	YOL041C	0	959.499	High	0	0.02625	1.5
	High	SISFDEALPR		0.0542886	0.00120145	1	1	1	YOL041C	0	1134.58	High	0.0007987	0.03774	1.68
	High	VAFVQQK		0.111501	0.0087043	1	1	1	YOL041C	0	819.472	High	0.006158	0.08231	1.67
High	Master Protein	IPI00166205 IPI:IPI00166205.2	TREMBL:Q7RTT2 ENSEMBL:ENSP00000352479 Tax_Id=9606 Keratin 5b	0	23.187	19	10	11	7	1	521	56.9	6.02	22.16	10
	Confidence	Sequence	Modifications	Qvality PEP	Qvality q-value	# Protein Groups	# Proteins	# PSMs	Master Protein Accessions	# Missed Cleavages	Theo. MH+ [Da]	Confidence (by Search Engine): Sequest HT	Percolator q-Value (by Search Engine): Sequest HT	Percolator PEP (by Search Engine): Sequest HT	XCorr (by Search Engine): Sequest HT
	High	QLEQLQGER		0.0230982	0	1	1	1	IPI00166205 IPI:IPI00166205.2	0	1100.57	High	0	0.01504	2.31
	High	LLEGEECR	1xCarbamidomethyl [C7]	0.0178771	0	6	13	1	IPI00300725 IPI:IPI00300725.6; sp; IPI00009867 IPI:IPI00009867.2; IPI00166205 IPI:IPI00166205.2; IPI00329306 IPI:IPI00329306.2; IPI00293665 IPI:IPI00293665.6	0	1005.47	High	0	0.01144	1.98
	High	LSLDVEIATYR		0.00202616	0	2	2	2	IPI00166205 IPI:IPI00166205.2; IPI00376379 IPI:IPI00376379.1	0	1279.69	High	0	0.014	2.65
	High	VDELEAALR		0.0131203	0	1	1	1	IPI00166205 IPI:IPI00166205.2	0	1015.54	High	0	0.00824	2.21
	High	YLDFSSIITEVR		0.000185274	0	1	1	1	IPI00166205 IPI:IPI00166205.2	0	1442.75	High	0	8.516e-05	2.26
	High	VQISQLHQEIQR		0.00692071	0	1	1	1	IPI00166205 IPI:IPI00166205.2	0	1478.81	High	0	0.004137	2.19
	High	TQETQEIR		0.0300215	0	1	1	1	IPI00166205 IPI:IPI00166205.2	0	1004.5	High	0	0.01998	2
	High	DVDGVFLSK		0.0470771	0	1	1	1	IPI00166205 IPI:IPI00166205.2	0	979.509	High	0	0.03242	1.96
	High	AEAEALYQTK		0.000585032	0	4	7	1	IPI00290078 IPI:IPI00290078.2; IPI00290857 IPI:IPI00290857.1; IPI00166205 IPI:IPI00166205.2; IPI00329306 IPI:IPI00329306.2	0	1123.56	High	0	0.0002924	2.69
	High	ATLENDFVVLK		0.0855908	0.00522949	1	1	1	IPI00166205 IPI:IPI00166205.2	0	1248.68	High	0.003855	0.06201	1.48
High	Master Protein	YLL024C	SSA2 SGDID:S000003947, Chr XII from 97485-95566, Genome Release 64-2-1, reverse complement, Verified ORF, "ATP-binding protein; involved in protein folding and vacuolar import of proteins; member of heat shock protein 70 (HSP70) family; associated with the chaperonin-containing T-complex; present in the cytoplasm, vacuolar membrane and cell wall; 98% identical with paralog Ssa1p, but subtle diffe…	0	22.25	23	11	11	7	1	639	69.4	5.06	17.22	11
	Confidence	Sequence	Modifications	Qvality PEP	Qvality q-value	# Protein Groups	# Proteins	# PSMs	Master Protein Accessions	# Missed Cleavages	Theo. MH+ [Da]	Confidence (by Search Engine): Sequest HT	Percolator q-Value (by Search Engine): Sequest HT	Percolator PEP (by Search Engine): Sequest HT	XCorr (by Search Engine): Sequest HT
	High	NQAAMNPANTVFDAK	1xOxidation [M5]	0.0203888	0	1	1	1	YLL024C	0	1607.75	High	0	0.01319	1.54
	High	NTISEAGDKLEQADKDAVTK		0.0372453	0	1	1	1	YLL024C	2	2133.07	High	0	0.02523	1.91
	High	NFNDPEVQGDMK	1xOxidation [M11]	0.0235574	0	1	1	1	YLL024C	0	1409.6	High	0	0.01537	1.66
	High	IINEPTAAAIAYGLDKK		0.000904874	0	2	4	1	YBL075C; YLL024C	1	1787.99	High	0	0.000466	3.35
	High	LIGDAAK		0.0441164	0	4	7	1	YJL034W; YBL075C; YLL024C; YDL229W	0	687.404	High	0	0.03021	1.45
	High	MKETAESYLGAK	1xOxidation [M1]	0.0392394	0	1	2	1	YLL024C	1	1343.65	High	0	0.0267	2.42
	High	VDIIANDQGNR		0.0372453	0	1	2	1	YLL024C	0	1214.61	High	0	0.02514	2.01
	High	FKEEDEKESQR		0.0400138	0	1	2	1	YLL024C	2	1424.67	High	0	0.02723	2.84
	High	FEELCADLFR	1xCarbamidomethyl [C5]	0.0246645	0	2	4	1	YBL075C; YLL024C	0	1299.6	High	0	0.01618	1.83
	High	ATAGDTHLGGEDFDNR		8.60791e-05	0	2	3	1	YBL075C; YLL024C	0	1675.73	High	0	3.745e-05	3.13
	High	VNDAVVTVPAYFNDSQR		0.0965211	0.00757788	1	2	1	YLL024C	0	1894.93	High	0.005416	0.07058	1.2
High	Master Protein	YEL002C	WBP1 SGDID:S000000728, Chr V from 150014-148722, Genome Release 64-2-1, reverse complement, Verified ORF, "Beta subunit of the oligosaccharyl transferase glycoprotein complex; required for N-linked glycosylation of proteins in the endoplasmic reticulum"	0	22.24	33	10	11	10	1	430	49.4	5.9	24.08	10
	Confidence	Sequence	Modifications	Qvality PEP	Qvality q-value	# Protein Groups	# Proteins	# PSMs	Master Protein Accessions	# Missed Cleavages	Theo. MH+ [Da]	Confidence (by Search Engine): Sequest HT	Percolator q-Value (by Search Engine): Sequest HT	Percolator PEP (by Search Engine): Sequest HT	XCorr (by Search Engine): Sequest HT
	High	SVHAVHSHADGTSYDEEPYK		0.00276391	0	1	1	2	YEL002C	0	2228.98	High	0	0.001546	3.16
	High	FFENEGNILCMSSPGAVPNTIR	1xCarbamidomethyl [C10]; 1xOxidation [M11]	0.000197931	0	1	1	1	YEL002C	0	2469.15	High	0	9.158e-05	2.8
	High	HLANDEYPR		0.00369611	0	1	1	1	YEL002C	0	1114.53	High	0	0.002112	1.45
	High	KSEDFVFGESSAALLENR		0.00231238	0	1	1	1	YEL002C	1	1998.98	High	0	0.001278	3.04
	High	LFLNELGIYPSPK		0.0139216	0	1	1	1	YEL002C	0	1490.83	High	0	0.008742	2.26
	High	LFDNIIVFPTK		0.0662946	0.0022289	1	1	1	YEL002C	0	1306.74	High	0.001487	0.04678	1.92
	High	TSFTESK		0.0782971	0.004336	1	1	1	YEL002C	0	799.383	High	0.003264	0.05606	1.69
	High	NQDSNQEFAK		0.0782971	0.004336	1	1	1	YEL002C	0	1180.52	High	0.003264	0.0563	1.64
	High	DYFSPSSEELVVSSNHLLNK		0.0959146	0.00757788	1	1	1	YEL002C	0	2265.1	High	0.005416	0.07014	2.07
	High	IGLSFTTDKDVK		0.101504	0.00835654	1	1	1	YEL002C	1	1323.72	High	0.005917	0.07434	2.96
High	Master Protein	IPI00290857 IPI:IPI00290857.1	SWISS-PROT:P12035 TREMBL:Q701L8|REFSEQ_NP:NP_476429|ENSEMBL:ENSP00000312206 Tax_Id=9606 Keratin, type II cytoskeletal 3	0	21.565	9	9	14	1	1	629	64.5	6.48	29.44	9
	Confidence	Sequence	Modifications	Qvality PEP	Qvality q-value	# Protein Groups	# Proteins	# PSMs	Master Protein Accessions	# Missed Cleavages	Theo. MH+ [Da]	Confidence (by Search Engine): Sequest HT	Percolator q-Value (by Search Engine): Sequest HT	Percolator PEP (by Search Engine): Sequest HT	XCorr (by Search Engine): Sequest HT
	High	NMEDLVEDFK	1xOxidation [M2]	0.0337712	0	1	1	1	IPI00290857 IPI:IPI00290857.1	0	1255.55	High	0	0.02273	1.45
	High	DYQELMNVK		0.00374526	0	2	4	1	IPI00290857 IPI:IPI00290857.1; sp	0	1139.54	High	0	0.002137	3.03
	High	AEAEALYQTK		0.000585032	0	4	7	1	IPI00290078 IPI:IPI00290078.2; IPI00290857 IPI:IPI00290857.1; IPI00166205 IPI:IPI00166205.2; IPI00329306 IPI:IPI00329306.2	0	1123.56	High	0	0.0002924	2.69
	High	LALDVEIATYRK		0.0483149	0	5	11	1	IPI00290857 IPI:IPI00290857.1; IPI00300725 IPI:IPI00300725.6; sp; IPI00009867 IPI:IPI00009867.2; IPI00293665 IPI:IPI00293665.6	1	1391.79	High	0	0.03329	3.12
	High	LALDVEIATYR		0.000114369	0	5	11	3	IPI00290857 IPI:IPI00290857.1; IPI00300725 IPI:IPI00300725.6; sp; IPI00009867 IPI:IPI00009867.2; IPI00293665 IPI:IPI00293665.6	0	1263.69	High	0	5.059e-05	3.31
	High	KYEDEINKR		0.00419026	0	2	3	1	IPI00290857 IPI:IPI00290857.1; sp	2	1194.61	High	0	0.002422	3.48
	High	YEDEINK		0.0505579	0.00120145	7	16	1	IPI00290857 IPI:IPI00290857.1; IPI00300725 IPI:IPI00300725.6; sp; IPI00009867 IPI:IPI00009867.2; IPI00293665 IPI:IPI00293665.6; IPI00376379 IPI:IPI00376379.1; IPI00556624 IPI:IPI00556624.1	0	910.415	High	0.0007987	0.03516	1.59
	High	FASFIDK		0.052902	0.00120145	9	22	3	IPI00290078 IPI:IPI00290078.2; IPI00290857 IPI:IPI00290857.1; IPI00300725 IPI:IPI00300725.6; IPI00556242 IPI:IPI00556242.1; sp; IPI00009867 IPI:IPI00009867.2; IPI00329306 IPI:IPI00329306.2; IPI00293665 IPI:IPI00293665.6; IPI00376379 IPI:IPI00376379.1	0	827.43	High	0.003546	0.05897	2.12
	High	DYQELMNVK	1xOxidation [M6]	0.0793017	0.00476234	2	4	1	IPI00290857 IPI:IPI00290857.1; sp	0	1155.54	High	0.003546	0.05713	2.09
	High	YEDEINKR		0.0877901	0.00571894	7	15	1	IPI00290857 IPI:IPI00290857.1; IPI00300725 IPI:IPI00300725.6; sp; IPI00009867 IPI:IPI00009867.2; IPI00293665 IPI:IPI00293665.6; IPI00376379 IPI:IPI00376379.1; IPI00556624 IPI:IPI00556624.1	1	1066.52	High	0.004177	0.06359	1.76
High	Master Protein	YGL008C	PMA1 SGDID:S000002976, Chr VII from 482666-479910, Genome Release 64-2-1, reverse complement, Verified ORF, "Plasma membrane P2-type H+-ATPase; pumps protons out of cell; major regulator of cytoplasmic pH and plasma membrane potential; long-lived protein asymmetrically distributed at plasma membrane between mother cells and buds; accumulates at high levels in mother cells during aging, buds emerg…	0	21.294	12	9	9	9	1	918	99.6	5.11	15.23	9
	Confidence	Sequence	Modifications	Qvality PEP	Qvality q-value	# Protein Groups	# Proteins	# PSMs	Master Protein Accessions	# Missed Cleavages	Theo. MH+ [Da]	Confidence (by Search Engine): Sequest HT	Percolator q-Value (by Search Engine): Sequest HT	Percolator PEP (by Search Engine): Sequest HT	XCorr (by Search Engine): Sequest HT
	High	QLGLGTNIYNAER		0.00125914	0	1	2	1	YGL008C	0	1448.75	High	0	0.000665	2.75
	High	LSAIESLAGVEILCSDK	1xCarbamidomethyl [C14]	0.00854766	0	1	2	1	YGL008C	0	1804.94	High	0	0.005192	2.15
	High	VLEFHPFDPVSK		0.000676576	0	1	2	1	YGL008C	0	1414.74	High	0	0.0003412	3.2
	High	YGLNQMADEK	1xOxidation [M6]	0.0348923	0	1	1	1	YGL008C	0	1184.53	High	0	0.02343	1.57
	High	VTAVVESPEGER		0.00158674	0	1	2	1	YGL008C	0	1272.64	High	0	0.0008508	2.78
	High	KADTGIAVEGATDAAR		0.000228903	0	1	2	1	YGL008C	1	1545.79	High	0	0.0001064	4.34
	High	DDTAQTVSEAR		0.0621659	0.0022289	1	1	1	YGL008C	0	1192.54	High	0.001487	0.04376	1.58
	High	GEGFMVVTATGDNTFVGR	1xOxidation [M5]	0.0793017	0.00476234	1	1	1	YGL008C	0	1873.87	High	0.003546	0.0569	0.98
	High	KVTAVVESPEGER		0.110807	0.0087043	1	2	1	YGL008C	1	1400.74	High	0.006158	0.0816	1.84
High	Master Protein	YGR155W	CYS4 SGDID:S000003387, Chr VII from 798543-800066, Genome Release 64-2-1, Verified ORF, "Cystathionine beta-synthase; catalyzes synthesis of cystathionine from serine and homocysteine, the first committed step in cysteine biosynthesis; responsible for hydrogen sulfide generation; advances passage through START by promoting cell growth which requires catalytic activity, and reducing critical cell …	0	21.107	22	8	10	8	1	507	56	6.7	19.47	8
	Confidence	Sequence	Modifications	Qvality PEP	Qvality q-value	# Protein Groups	# Proteins	# PSMs	Master Protein Accessions	# Missed Cleavages	Theo. MH+ [Da]	Confidence (by Search Engine): Sequest HT	Percolator q-Value (by Search Engine): Sequest HT	Percolator PEP (by Search Engine): Sequest HT	XCorr (by Search Engine): Sequest HT
	High	NSSAVITDGLKPIHIVTK		0.0339926	0	1	1	1	YGR155W	0	1893.08	High	0	0.02294	2.03
	High	QLEDLNLFDNLR		0.00575288	0	1	1	1	YGR155W	0	1489.76	High	0	0.003391	1.65
	High	IQIVGADPFGSILAQPENLNK		0.00255326	0	1	1	1	YGR155W	0	2224.2	High	0	0.00142	3.22
	High	LSGLVTLSELLR		0.00430242	0	1	1	1	YGR155W	0	1300.78	High	0	0.002477	2.15
	High	VEGIGYDFVPQVLDR		0.00575288	0	1	1	1	YGR155W	0	1706.87	High	0	0.003399	1.67
	High	SMVEEAEASGR	1xOxidation [M2]	0.0174129	0	1	1	2	YGR155W	0	1181.51	High	0	0.01113	2.37
	High	SMVEEAEASGR		0.00860424	0	1	1	1	YGR155W	0	1165.52	High	0	0.005226	2.38
	High	AVVAGAGTGGTISGISK		0.00067212	0	1	1	1	YGR155W	0	1445.8	High	0	0.0003392	2.13
	High	TDITDYK		0.0605848	0.0022289	1	1	1	YGR155W	0	855.409	High	0.001487	0.0426	1.6
High	Master Protein	sp	K1C15_SHEEP	0	21.029	14	8	17	1	1	453	48.7	4.79	39.92	8
	Confidence	Sequence	Modifications	Qvality PEP	Qvality q-value	# Protein Groups	# Proteins	# PSMs	Master Protein Accessions	# Missed Cleavages	Theo. MH+ [Da]	Confidence (by Search Engine): Sequest HT	Percolator q-Value (by Search Engine): Sequest HT	Percolator PEP (by Search Engine): Sequest HT	XCorr (by Search Engine): Sequest HT
	High	RVLDELTLTK		0.0192179	0	2	3	2	sp; sp	1	1187.7	High	0	0.01235	3.08
	High	QSVEADINGLR		0.00205311	0	2	6	2	sp; sp	0	1201.62	High	0	0.001122	2.98
	High	VLDELTLTK		0.00475041	0	2	3	2	sp; sp	0	1031.6	High	0	0.002769	2.51
	High	ALEEANADLEVK		2.78849e-06	0	3	7	2	IPI00384444 IPI:IPI00384444.4; sp; IPI00217963 IPI:IPI00217963.2	0	1301.66	High	0	9.475e-07	4.43
	High	LAADDFR		0.0346652	0	7	27	5	sp; IPI00384444 IPI:IPI00384444.4; IPI00383759 IPI:IPI00383759.1; sp; sp; IPI00217963 IPI:IPI00217963.2; IPI00450768 IPI:IPI00450768.4	0	807.4	High	0.002933	0.05342	1.97
	High	LASYLEK		0.0365235	0	2	14	1	IPI00383759 IPI:IPI00383759.1; sp	0	823.456	High	0	0.02471	2.05
	High	DYSPYFK		0.0582859	0.00120145	3	3	2	IPI00384444 IPI:IPI00384444.4; sp; IPI00217963 IPI:IPI00217963.2	0	919.42	High	0.0007987	0.0409	1.96
	High	VILEIDNAR		0.0798085	0.00476234	1	5	1	sp	0	1042.59	High	0.003546	0.05753	2.14
High	Master Protein	YKL021C	MAK11 SGDID:S000001504, Chr XI from 398750-397344, Genome Release 64-2-1, reverse complement, Verified ORF, "Protein involved in an early step of 60S ribosomal subunit biogenesis; essential for cell growth and replication of killer M1 dsRNA virus; contains four beta-transducin repeats"	0	20.579	22	8	9	8	1	468	53.6	8.44	17.05	8
	Confidence	Sequence	Modifications	Qvality PEP	Qvality q-value	# Protein Groups	# Proteins	# PSMs	Master Protein Accessions	# Missed Cleavages	Theo. MH+ [Da]	Confidence (by Search Engine): Sequest HT	Percolator q-Value (by Search Engine): Sequest HT	Percolator PEP (by Search Engine): Sequest HT	XCorr (by Search Engine): Sequest HT
	High	LNCLTLCDESIEK	2xCarbamidomethyl [C3; C7]	0.0139216	0	1	1	1	YKL021C	0	1594.75	High	0	0.008733	2.04
	High	VKDWETVGTLK		0.0035525	0	1	1	1	YKL021C	1	1275.69	High	0	0.002024	2.91
	High	VNDVDIHPTNR		0.00142756	0	1	1	2	YKL021C	0	1279.64	High	0	0.0007586	3.29
	High	YLVSGSNDEHIR		0.000947713	0	1	1	1	YKL021C	0	1389.68	High	0	0.0004899	2.47
	High	EQVAVYDCGER	1xCarbamidomethyl [C8]	0.00854766	0	1	1	1	YKL021C	0	1325.58	High	0	0.005207	2
	High	DAETADIGDQSEVESDTEELKK		0.00821595	0	1	1	1	YKL021C	1	2409.08	High	0	0.004965	2.73
	High	IAISVSDDHSIR		0.0316345	0	1	1	1	YKL021C	0	1312.69	High	0	0.0212	1.79
	High	WLLSASEDHK		0.0605848	0.0022289	1	1	1	YKL021C	0	1185.59	High	0.001487	0.04245	1.85
High	Master Protein	YBR263W	SHM1 SGDID:S000000467, Chr II from 736264-737736, Genome Release 64-2-1, Verified ORF, "Mitochondrial serine hydroxymethyltransferase; converts serine to glycine plus 5,10 methylenetetrahydrofolate; involved in generating precursors for purine, pyrimidine, amino acid, and lipid biosynthesis; reverse reaction generates serine"	0	20.311	21	9	10	9	1	490	53.7	8.72	21.02	9
	Confidence	Sequence	Modifications	Qvality PEP	Qvality q-value	# Protein Groups	# Proteins	# PSMs	Master Protein Accessions	# Missed Cleavages	Theo. MH+ [Da]	Confidence (by Search Engine): Sequest HT	Percolator q-Value (by Search Engine): Sequest HT	Percolator PEP (by Search Engine): Sequest HT	XCorr (by Search Engine): Sequest HT
	High	QAMSPEFK	1xOxidation [M3]	0.0144826	0	1	1	1	YBR263W	0	953.44	High	0	0.009148	2.18
	High	LVSGGTDNHLIVIDLSGTQVDGAR		0.0277531	0	1	1	1	YBR263W	0	2437.27	High	0	0.01841	2.25
	High	VETILSALNIAANK		0.000222932	0	1	1	1	YBR263W	0	1456.84	High	0	0.0001041	3.31
	High	VIVAGTSAYSR		0.0126118	0	1	1	1	YBR263W	0	1123.61	High	0	0.00789	2.46
	High	EEFSQVAK		0.0312234	0	1	1	1	YBR263W	0	937.463	High	0	0.02092	1.65
	High	AVMDLLGSELQNK	1xOxidation [M3]	0.00478188	0	1	1	1	YBR263W	0	1433.73	High	0	0.002774	2.76
	High	AVMDLLGSELQNK		0.00913048	0	1	1	1	YBR263W	0	1417.74	High	0	0.005554	2.45
	High	YIDSAVK		0.0711404	0.0022289	1	1	1	YBR263W	0	795.425	High	0.001487	0.05073	1.25
	High	YSEGYPGER		0.0629713	0.0022289	1	1	1	YBR263W	0	1057.46	High	0.001487	0.0443	1.71
	High	ALELYGLDPAK		0.068897	0.0022289	1	1	1	YBR263W	0	1189.65	High	0.001487	0.04881	2.24
High	Master Protein	YDR497C	ITR1 SGDID:S000002905, Chr IV from 1445467-1443713, Genome Release 64-2-1, reverse complement, Verified ORF, "Myo-inositol transporter; member of the sugar transporter superfamily; expression is repressed by inositol and choline via Opi1p and derepressed via Ino2p and Ino4p; relative distribution to the vacuole increases upon DNA replication stress; ITR1 has a paralog, ITR2, that arose from the w…	0	19.619	14	6	7	6	1	584	63.5	6.54	12.19	6
	Confidence	Sequence	Modifications	Qvality PEP	Qvality q-value	# Protein Groups	# Proteins	# PSMs	Master Protein Accessions	# Missed Cleavages	Theo. MH+ [Da]	Confidence (by Search Engine): Sequest HT	Percolator q-Value (by Search Engine): Sequest HT	Percolator PEP (by Search Engine): Sequest HT	XCorr (by Search Engine): Sequest HT
	High	ITLESHEIQR		0.000737267	0	1	1	2	YDR497C	0	1225.65	High	0	0.0004473	2.72
	High	TSQSNVGDAVGNADSVEFNSEHDSPSK		0.036286	0	1	1	1	YDR497C	0	2778.21	High	0	0.02461	1.32
	High	SYTDTSEEIIER		0.000479825	0	1	1	1	YDR497C	0	1442.66	High	0	0.0002369	2.57
	High	KVEELVTLNQSIPGK		2.51813e-05	0	1	1	1	YDR497C	1	1654.94	High	0	9.993e-06	4.53
	High	VLTYGEK		0.0499069	0.00120145	1	2	1	YDR497C	0	809.44	High	0.0007987	0.03459	1.19
	High	ELHTVPSNLR		0.097745	0.00757788	1	1	1	YDR497C	0	1165.63	High	0.005416	0.07138	1.95
High	Master Protein	YNR053C	NOG2 SGDID:S000005336, Chr XIV from 721770-721120,723112-722303, Genome Release 64-2-1, reverse complement, Verified ORF, "Putative GTPase; associates with pre-60S ribosomal subunits in the nucleolus and is required for their nuclear export and maturation"	0	18.908	20	8	8	8	1	486	55.5	9.5	18.25	8
	Confidence	Sequence	Modifications	Qvality PEP	Qvality q-value	# Protein Groups	# Proteins	# PSMs	Master Protein Accessions	# Missed Cleavages	Theo. MH+ [Da]	Confidence (by Search Engine): Sequest HT	Percolator q-Value (by Search Engine): Sequest HT	Percolator PEP (by Search Engine): Sequest HT	XCorr (by Search Engine): Sequest HT
	High	ILDTESYADAFGPK		0.00240588	0	1	1	1	YNR053C	0	1526.74	High	0	0.001336	2.05
	High	VIDSSDVVIHVLDAR		0.00132749	0	1	1	1	YNR053C	0	1637.89	High	0	0.0007024	2.73
	High	VISQDALQHFR		0.00549307	0	1	1	1	YNR053C	0	1313.7	High	0	0.003219	2.32
	High	AASFQDSTIPDAR		0.00257019	0	1	1	1	YNR053C	0	1378.66	High	0	0.001427	2.25
	High	DATEFIEILAR		0.042153	0	1	1	1	YNR053C	0	1277.67	High	0	0.02876	1.87
	High	ATNEDITKYEEK		0.00321741	0	1	1	1	YNR053C	1	1440.69	High	0	0.001826	3.23
	High	LAASNLEDLVK		0.0174129	0	1	1	1	YNR053C	0	1172.65	High	0	0.01114	1.93
	High	FLNMYTSGK	1xOxidation [M4]	0.068897	0.0022289	1	1	1	YNR053C	0	1076.51	High	0.001487	0.049	1.87
High	Master Protein	YHR107C	CDC12 SGDID:S000001149, Chr VIII from 328036-326813, Genome Release 64-2-1, reverse complement, Verified ORF, "Component of the septin ring that is required for cytokinesis; septins are GTP-binding proteins that assemble into rod-like hetero-oligomers that can associate with other rods to form filaments; septin rings at the mother-bud neck act as scaffolds for recruiting cell division factors and…	0	18.596	19	8	9	8	1	407	46.6	7.99	15.97	8
	Confidence	Sequence	Modifications	Qvality PEP	Qvality q-value	# Protein Groups	# Proteins	# PSMs	Master Protein Accessions	# Missed Cleavages	Theo. MH+ [Da]	Confidence (by Search Engine): Sequest HT	Percolator q-Value (by Search Engine): Sequest HT	Percolator PEP (by Search Engine): Sequest HT	XCorr (by Search Engine): Sequest HT
	High	QWEQNIVNER		0.000284682	0	1	1	1	YHR107C	0	1315.64	High	0	0.0001352	2.92
	High	TVEIDITR		0.0427051	0	1	1	1	YHR107C	0	946.52	High	0	0.02917	2.01
	High	YKEEENALKK		0.0184746	0	1	1	1	YHR107C	2	1251.66	High	0	0.01187	2.73
	High	YKEEENALK		0.0177599	0	1	1	1	YHR107C	1	1123.56	High	0	0.01137	1.65
	High	SGSNPDSAAVEHAR		0.000732411	0	1	1	2	YHR107C	0	1397.64	High	0	0.0003712	2.78
	High	ADTLTAQELQQFK		0.017995	0	1	1	1	YHR107C	0	1492.76	High	0	0.01152	2.09
	High	QVIEAQEIR		0.0671514	0.0022289	1	1	1	YHR107C	0	1085.59	High	0.001487	0.04774	1.15
	High	QLIEAMPFAIVGSEK	1xOxidation [M6]	0.0706862	0.0022289	1	1	1	YHR107C	0	1648.86	High	0.001487	0.05032	1.41
High	Master Protein	YHR169W	DBP8 SGDID:S000001212, Chr VIII from 442181-443476, Genome Release 64-2-1, Verified ORF, "ATPase, putative RNA helicase of the DEAD-box family; component of 90S preribosome complex involved in production of 18S rRNA and assembly of 40S small ribosomal subunit; ATPase activity stimulated by association with Esf2p"	0	18.533	20	8	9	8	1	431	47.8	9.61	15.67	8
	Confidence	Sequence	Modifications	Qvality PEP	Qvality q-value	# Protein Groups	# Proteins	# PSMs	Master Protein Accessions	# Missed Cleavages	Theo. MH+ [Da]	Confidence (by Search Engine): Sequest HT	Percolator q-Value (by Search Engine): Sequest HT	Percolator PEP (by Search Engine): Sequest HT	XCorr (by Search Engine): Sequest HT
	High	IGDAISFVTQR		0.000112123	0	1	1	1	YHR169W	0	1206.65	High	0	4.959e-05	3.41
	High	VASLHSQMPQQER	1xOxidation [M8]	0.0234033	0	1	1	1	YHR169W	0	1526.74	High	0	0.01531	1.9
	High	VASLHSQMPQQER		0.00336966	0	1	1	1	YHR169W	0	1510.74	High	0	0.001907	3.01
	High	TMTAEILR	1xOxidation [M2]	0.0209317	0	1	1	1	YHR169W	0	950.498	High	0	0.01362	1.71
	High	LAHHIMSSGDDTVGGLMR	2xOxidation [M6; M17]	0.0019864	0	1	1	1	YHR169W	0	1928.9	High	0	0.001088	2.67
	High	ESLMAMQK	2xOxidation [M4; M6]	0.0725198	0.0022289	1	1	1	YHR169W	0	969.438	High	0.001856	0.05181	1.53
	High	ILIATDVASR		0.068897	0.0022289	1	1	1	YHR169W	0	1058.62	High	0.001487	0.04903	2.16
	High	KPHFIIATPGR		0.0889097	0.00571894	1	1	1	YHR169W	0	1236.72	High	0.004177	0.06427	2.72
	High	TAIIFVNR		0.112901	0.0087043	1	1	1	YHR169W	0	933.552	High	0.006158	0.08371	1.36
High	Master Protein	YML086C	ALO1 SGDID:S000004551, Chr XIII from 97371-95791, Genome Release 64-2-1, reverse complement, Verified ORF, "D-Arabinono-1,4-lactone oxidase; catalyzes the final step in biosynthesis of dehydro-D-arabinono-1,4-lactone, which is protective against oxidative stress"	0	17.841	18	8	9	8	1	526	59.5	6.8	16.53	8
	Confidence	Sequence	Modifications	Qvality PEP	Qvality q-value	# Protein Groups	# Proteins	# PSMs	Master Protein Accessions	# Missed Cleavages	Theo. MH+ [Da]	Confidence (by Search Engine): Sequest HT	Percolator q-Value (by Search Engine): Sequest HT	Percolator PEP (by Search Engine): Sequest HT	XCorr (by Search Engine): Sequest HT
	High	NFLGSTTLAAGPVK		0.00128435	0	1	1	1	YML086C	0	1375.76	High	0	0.0006788	2.85
	High	IYAPLTPFVEK		0.02532	0	1	1	1	YML086C	0	1277.71	High	0	0.01665	1.76
	High	VEEWYGEDLKK		0.0165202	0	1	1	1	YML086C	1	1395.68	High	0	0.01051	3.12
	High	SLDHSIAQAAINK		0.00379506	0	1	1	2	YML086C	0	1367.73	High	0	0.002179	2.26
	High	DTDYDDFEMR	1xOxidation [M9]	0.0188426	0	1	1	1	YML086C	0	1322.48	High	0	0.01216	1.57
	High	FLDAENDPEVFK		0.00490986	0	1	1	1	YML086C	0	1423.67	High	0	0.002865	2.36
	High	STQEVITFENLLK		0.0546407	0.00120145	1	1	1	YML086C	0	1521.82	High	0.0007987	0.03806	2.37
	High	LYQLNEFLGAK		0.111501	0.0087043	1	1	1	YML086C	0	1295.7	High	0.006158	0.08221	1.26
High	Master Protein	YGL111W	NSA1 SGDID:S000003079, Chr VII from 299978-301369, Genome Release 64-2-1, Verified ORF, "Constituent of 66S pre-ribosomal particles; involved in 60S ribosomal subunit biogenesis"	0	17.803	16	8	9	8	1	463	51.9	7.84	19.03	8
	Confidence	Sequence	Modifications	Qvality PEP	Qvality q-value	# Protein Groups	# Proteins	# PSMs	Master Protein Accessions	# Missed Cleavages	Theo. MH+ [Da]	Confidence (by Search Engine): Sequest HT	Percolator q-Value (by Search Engine): Sequest HT	Percolator PEP (by Search Engine): Sequest HT	XCorr (by Search Engine): Sequest HT
	High	NSGVVELVK		0.0441164	0	1	1	2	YGL111W	0	944.541	High	0.001487	0.05058	1.9
	High	LLVSCVDSGSIK	1xCarbamidomethyl [C5]	0.012529	0	1	1	1	YGL111W	0	1277.68	High	0	0.0078	2.12
	High	LNYQFAAITR		0.0210696	0	1	1	1	YGL111W	0	1196.64	High	0	0.01364	2.29
	High	ENEALQVDPK		0.00015706	0	1	1	1	YGL111W	0	1142.57	High	0	7.129e-05	2.69
	High	DSSNNTFVAATK		0.000238162	0	1	1	1	YGL111W	0	1254.6	High	0	0.0001113	3.17
	High	HLKENEALQVDPK		0.0337712	0	1	1	1	YGL111W	1	1520.81	High	0	0.02275	3.02
	High	LVDGFVTLCPIK	1xCarbamidomethyl [C9]	0.0720571	0.0022289	1	1	1	YGL111W	0	1361.75	High	0.001487	0.05152	1.96
	High	FLEPSPGK		0.0734535	0.00332055	1	1	1	YGL111W	0	874.467	High	0.00222	0.05246	1.58
High	Master Protein	YHR065C	RRP3 SGDID:S000001107, Chr VIII from 229037-227532, Genome Release 64-2-1, reverse complement, Verified ORF, "Protein involved in rRNA processing; required for maturation of the 35S primary transcript of pre-rRNA and for cleavage leading to mature 18S rRNA; homologous to eIF-4a, which is a DEAD box RNA-dependent ATPase with helicase activity"	0	17.476	19	8	8	8	1	501	55.9	9.16	17.63	8
	Confidence	Sequence	Modifications	Qvality PEP	Qvality q-value	# Protein Groups	# Proteins	# PSMs	Master Protein Accessions	# Missed Cleavages	Theo. MH+ [Da]	Confidence (by Search Engine): Sequest HT	Percolator q-Value (by Search Engine): Sequest HT	Percolator PEP (by Search Engine): Sequest HT	XCorr (by Search Engine): Sequest HT
	High	LLDMEFGPVLDR	1xOxidation [M4]	0.00567742	0	1	1	1	YHR065C	0	1420.71	High	0	0.003345	2.15
	High	TTYLFSATMTSK	1xOxidation [M9]	0.0154681	0	1	1	1	YHR065C	0	1366.66	High	0	0.009822	2.44
	High	TAAFAIPILNR		0.000254432	0	1	1	1	YHR065C	0	1186.69	High	0	0.0001193	2.48
	High	ETFDSLGSLMGVR	1xOxidation [M10]	0.0245032	0	1	1	1	YHR065C	0	1427.68	High	0	0.01613	2.03
	High	FLVMDEADR	1xOxidation [M4]	0.0333328	0	1	1	1	YHR065C	0	1111.51	High	0	0.02233	1.96
	High	ANDELTSLAEK		0.0021789	0	1	1	1	YHR065C	0	1190.59	High	0	0.0012	1.66
	High	ASLTNPVK		0.0470771	0	1	1	1	YHR065C	0	829.478	High	0	0.03257	1.88
	High	LWHDQEPYYACILAPTR	1xCarbamidomethyl [C11]	0.0839756	0.00476234	1	1	1	YHR065C	0	2133.02	High	0.003546	0.06058	3.02
High	Master Protein	YPR041W	TIF5 SGDID:S000006245, Chr XVI from 648704-649921, Genome Release 64-2-1, Verified ORF, "Translation initiation factor eIF5; functions both as a GTPase-activating protein to mediate hydrolysis of ribosome-bound GTP and as a GDP dissociation inhibitor to prevent recycling of eIF2"	0	17.073	25	8	9	8	1	405	45.2	5.06	13.47	8
	Confidence	Sequence	Modifications	Qvality PEP	Qvality q-value	# Protein Groups	# Proteins	# PSMs	Master Protein Accessions	# Missed Cleavages	Theo. MH+ [Da]	Confidence (by Search Engine): Sequest HT	Percolator q-Value (by Search Engine): Sequest HT	Percolator PEP (by Search Engine): Sequest HT	XCorr (by Search Engine): Sequest HT
	High	NPPDSVSGSK		0.0222061	0	1	1	2	YPR041W	0	987.474	High	0	0.01445	1.75
	High	NFMGGIER	1xOxidation [M3]	0.0452782	0	1	1	1	YPR041W	0	939.435	High	0	0.03123	1.48
	High	ILVTPEYEK		0.039754	0	1	1	1	YPR041W	0	1091.6	High	0	0.02697	1.9
	High	LQDVLDGFINK		0.00253645	0	1	1	1	YPR041W	0	1261.68	High	0	0.001411	2.58
	High	SQNAPSDGTGSSTPQHHDEDEDELSR		0.000612729	0	1	1	1	YPR041W	0	2796.16	High	0	0.0003071	2.81
	High	TAVLNVADISHALNRPAPYIVK		0.00219334	0	1	1	1	YPR041W	0	2362.32	High	0	0.001208	2.7
	High	DLIPLLPK		0.0279355	0	1	1	1	YPR041W	0	908.582	High	0	0.0185	1.59
	High	MPPIQAK	1xOxidation [M1]	0.0983624	0.00757788	1	1	1	YPR041W	0	800.433	High	0.005416	0.07171	1.14
High	Master Protein	YHR052W	CIC1 SGDID:S000001094, Chr VIII from 210848-211978, Genome Release 64-2-1, Verified ORF, "Essential protein that interacts with proteasome components; has a potential role in proteasome substrate specificity; also copurifies with 66S pre-ribosomal particles"	0	17.063	24	9	11	9	1	376	42.5	8.78	17.88	9
	Confidence	Sequence	Modifications	Qvality PEP	Qvality q-value	# Protein Groups	# Proteins	# PSMs	Master Protein Accessions	# Missed Cleavages	Theo. MH+ [Da]	Confidence (by Search Engine): Sequest HT	Percolator q-Value (by Search Engine): Sequest HT	Percolator PEP (by Search Engine): Sequest HT	XCorr (by Search Engine): Sequest HT
	High	VETTPISIR		0.00524498	0	1	1	1	YHR052W	0	1015.58	High	0	0.003072	2.36
	High	VYMNQLPVK	1xOxidation [M3]	0.00720024	0	1	1	1	YHR052W	0	1107.59	High	0	0.004332	2.04
	High	SSSELEKESSESEAVKK		0.0151657	0	1	1	1	YHR052W	2	1853.9	High	0	0.009581	1.81
	High	SSTAIPR		0.0476921	0	1	1	1	YHR052W	0	731.405	High	0	0.03283	1.38
	High	EFSLTTLTNNIK		0.0367626	0	1	1	1	YHR052W	0	1380.74	High	0	0.02494	1.75
	High	AYNKVETTPISIR		0.0103492	0	1	1	1	YHR052W	1	1491.82	High	0	0.006386	2.87
	High	GLMEIANPSELGSIFSK	1xOxidation [M3]	0.0522217	0.00120145	1	1	2	YHR052W	0	1808.91	High	0.0007987	0.03641	1.82
	High	DLQLIVVNNK		0.0813476	0.00476234	1	1	1	YHR052W	0	1155.67	High	0.003546	0.05871	1.97
	High	AVNELIK		0.0983624	0.00757788	1	1	1	YHR052W	0	786.472	High	0.005416	0.07199	1.71
	High	VYMNQLPVK		0.114317	0.00917297	1	1	1	YHR052W	0	1091.59	High	0.006466	0.08433	1.71
High	Master Protein	sp	CAS1_BOVIN	0	16.718	34	7	9	7	1	214	24.5	5.02	25.71	7
	Confidence	Sequence	Modifications	Qvality PEP	Qvality q-value	# Protein Groups	# Proteins	# PSMs	Master Protein Accessions	# Missed Cleavages	Theo. MH+ [Da]	Confidence (by Search Engine): Sequest HT	Percolator q-Value (by Search Engine): Sequest HT	Percolator PEP (by Search Engine): Sequest HT	XCorr (by Search Engine): Sequest HT
	High	YKVPQLEIVPNSAEER	1xPhospho [S12(100)]	0.00866118	0	1	1	1	sp	1	1951.95	High	0	0.005277	3.72
	High	FFVAPFPEVFGK		0.0237125	0	1	1	3	sp	0	1384.73	High	0	0.0155	2.23
	High	HQGLPQEVLNENLLR		3.57428e-05	0	1	1	1	sp	0	1759.94	High	0	1.46e-05	3.9
	High	HIQKEDVPSER		0.000324907	0	1	1	1	sp	1	1337.68	High	0	0.0001553	4.11
	High	EDVPSER		0.052902	0.00120145	1	1	1	sp	0	831.384	High	0.0007987	0.03675	2.02
	High	EPMIGVNQELAYFYPELFR	1xOxidation [M3]	0.065029	0.0022289	1	1	1	sp	0	2332.13	High	0.001487	0.04603	2.92
	High	VPQLEIVPNSAEER	1xPhospho [S10(100)]	0.0845108	0.00522949	1	1	1	sp	0	1660.79	High	0.003855	0.06095	2.94
High	Master Protein	YMR145C	NDE1 SGDID:S000004753, Chr XIII from 556475-554793, Genome Release 64-2-1, reverse complement, Verified ORF, "Mitochondrial external NADH dehydrogenase; type II NAD(P)H:quinone oxidoreductase that catalyzes the oxidation of cytosolic NADH; Nde1p and Nde2p provide cytosolic NADH to the mitochondrial respiratory chain; NDE1 has a paralog, NDE2, that arose from the whole genome duplication"	0	16.379	11	8	9	8	1	560	62.7	9.28	15.97	8
	Confidence	Sequence	Modifications	Qvality PEP	Qvality q-value	# Protein Groups	# Proteins	# PSMs	Master Protein Accessions	# Missed Cleavages	Theo. MH+ [Da]	Confidence (by Search Engine): Sequest HT	Percolator q-Value (by Search Engine): Sequest HT	Percolator PEP (by Search Engine): Sequest HT	XCorr (by Search Engine): Sequest HT
	High	IMSSIEK	1xOxidation [M2]	0.0400138	0	1	1	1	YMR145C	0	823.423	High	0	0.02729	1.98
	High	YLVDYAQDLFKEEK		0.0452782	0	1	1	1	YMR145C	1	1760.87	High	0	0.03104	2.36
	High	YLVDYAQDLFK		0.0145783	0	1	1	1	YMR145C	0	1374.69	High	0	0.009176	2.76
	High	TQSQIEDFK		0.00652159	0	1	1	1	YMR145C	0	1095.53	High	0	0.003892	2.06
	High	EISDAQEIR		0.0105559	0	1	1	1	YMR145C	0	1060.53	High	0	0.006518	1.92
	High	DYVDQDLR		0.0158807	0	1	1	1	YMR145C	0	1023.47	High	0	0.01011	2.57
	High	GALAYIGSDK		0.00139954	0	1	1	1	YMR145C	0	994.52	High	0	0.0007441	2.32
	High	AASLSPK		0.041338	0	1	1	2	YMR145C	0	673.388	High	0	0.02814	1.47
High	Master Protein	YMR093W	UTP15 SGDID:S000004699, Chr XIII from 454015-455556, Genome Release 64-2-1, Verified ORF, "Nucleolar protein; component of the small subunit (SSU) processome containing the U3 snoRNA that is involved in processing of pre-18S rRNA"	0	16.262	20	7	8	7	1	513	57.7	9.31	15.38	7
	Confidence	Sequence	Modifications	Qvality PEP	Qvality q-value	# Protein Groups	# Proteins	# PSMs	Master Protein Accessions	# Missed Cleavages	Theo. MH+ [Da]	Confidence (by Search Engine): Sequest HT	Percolator q-Value (by Search Engine): Sequest HT	Percolator PEP (by Search Engine): Sequest HT	XCorr (by Search Engine): Sequest HT
	High	TLSFIPAAPHLVATGSYDGLIR		0.00450597	0	1	1	1	YMR093W	0	2299.24	High	0	0.002607	2.13
	High	ELTLTVLQELR		0.0109097	0	1	1	1	YMR093W	0	1314.76	High	0	0.006721	2.5
	High	FSGPVLSCAVSPSTAQGNR	1xCarbamidomethyl [C8]	5.10703e-05	0	1	1	2	YMR093W	0	1934.94	High	0	2.131e-05	3.85
	High	GSEYQGDQEHIIHNDK		0.000841435	0	1	1	1	YMR093W	0	1869.84	High	0	0.0004325	2.68
	High	ILATASDDR		0.0839756	0.00476234	1	1	1	YMR093W	0	961.495	High	0.003546	0.06046	1.45
	High	SSDKENAPASFNK		0.0989834	0.00757788	1	1	1	YMR093W	1	1394.65	High	0.005416	0.07216	1.49
	High	HLVAGLSSGLLAIR		0.105398	0.00835654	1	1	1	YMR093W	0	1406.85	High	0.005917	0.07756	1.67
High	Master Protein	YBR196C	PGI1 SGDID:S000000400, Chr II from 613900-612236, Genome Release 64-2-1, reverse complement, Verified ORF, "Glycolytic enzyme phosphoglucose isomerase; catalyzes the interconversion of glucose-6-phosphate and fructose-6-phosphate; required for cell cycle progression and completion of the gluconeogenic events of sporulation"	0	15.352	15	7	8	7	1	554	61.3	6.46	11.19	7
	Confidence	Sequence	Modifications	Qvality PEP	Qvality q-value	# Protein Groups	# Proteins	# PSMs	Master Protein Accessions	# Missed Cleavages	Theo. MH+ [Da]	Confidence (by Search Engine): Sequest HT	Percolator q-Value (by Search Engine): Sequest HT	Percolator PEP (by Search Engine): Sequest HT	XCorr (by Search Engine): Sequest HT
	High	VFSGNRPTTSILAQK		0.0418796	0	1	1	1	YBR196C	0	1618.89	High	0	0.02865	1.66
	High	VVDPETTLFLIASK		0.00101916	0	1	1	1	YBR196C	0	1532.86	High	0	0.0005295	3.3
	High	TFTTAETITNANTAK		0.000417653	0	1	1	1	YBR196C	0	1583.79	High	0	0.0002029	2.35
	High	AEGATGGLVPHK		0.0109097	0	1	1	2	YBR196C	0	1136.61	High	0	0.006735	1.97
	High	EFSEQVR		0.0965211	0.00757788	1	1	1	YBR196C	0	894.432	High	0.005416	0.07041	1.94
	High	TGNDPSHIAK		0.108071	0.00835654	1	1	1	YBR196C	0	1039.52	High	0.005917	0.0798	1.84
	High	EANVTGLR		0.102787	0.00835654	1	1	1	YBR196C	0	859.463	High	0.005917	0.07534	1.93
High	Master Protein	sp	CAS2_BOVIN	0	15.184	34	9	10	9	1	222	26	8.43	19.35	9
	Confidence	Sequence	Modifications	Qvality PEP	Qvality q-value	# Protein Groups	# Proteins	# PSMs	Master Protein Accessions	# Missed Cleavages	Theo. MH+ [Da]	Confidence (by Search Engine): Sequest HT	Percolator q-Value (by Search Engine): Sequest HT	Percolator PEP (by Search Engine): Sequest HT	XCorr (by Search Engine): Sequest HT
	High	NMAINPSK	1xOxidation [M2]	0.0133822	0	1	1	1	sp	0	890.44	High	0	0.008421	2.27
	High	ENLCSTFCK	2xCarbamidomethyl [C4; C8]	0.00560295	0	1	1	1	sp	0	1158.49	High	0	0.003305	2.42
	High	ALNEINQFYQK		0.00144655	0	1	1	1	sp	0	1367.7	High	0	0.0007701	2.45
	High	NMAINPSKENLCSTFCK	2xCarbamidomethyl [C12; C16]; 1xOxidation [M2]; 1xPhospho [S/T]	0.0525608	0.00120145	1	1	1	sp	1	2109.88	High	0.0007987	0.03662	2.63
	High	EQLSTSEENSK	1xPhospho [S6(98)]	0.0667216	0.0022289	1	1	1	sp	0	1331.54	High	0.001487	0.04737	2.48
	High	TKLTEEEKNR		0.0725198	0.0022289	1	1	1	sp	2	1247.66	High	0.001487	0.05154	2.79
	High	ITVDDK		0.0787979	0.004336	1	1	2	sp	0	690.367	High	0.003546	0.05644	1.81
	High	FALPQYLK		0.103434	0.00835654	1	1	1	sp	0	979.561	High	0.005917	0.07603	1.51
	High	TVDMESTEVFTK	1xPhospho [S6(91.2)]	0.108071	0.00835654	1	1	1	sp	0	1466.61	High	0.005917	0.07969	2.49
High	Master Protein	YBR143C	SUP45 SGDID:S000000347, Chr II from 532182-530869, Genome Release 64-2-1, reverse complement, Verified ORF, "Polypeptide release factor (eRF1) in translation termination; mutant form acts as a recessive omnipotent suppressor; methylated by Mtq2p-Trm112p in ternary complex eRF1-eRF3-GTP; mutation of methylation site confers resistance to zymocin; has a role in cytokinesis through interaction with …	0	14.861	21	9	9	9	1	437	49	5.05	18.28	9
	Confidence	Sequence	Modifications	Qvality PEP	Qvality q-value	# Protein Groups	# Proteins	# PSMs	Master Protein Accessions	# Missed Cleavages	Theo. MH+ [Da]	Confidence (by Search Engine): Sequest HT	Percolator q-Value (by Search Engine): Sequest HT	Percolator PEP (by Search Engine): Sequest HT	XCorr (by Search Engine): Sequest HT
	High	LIVFENLETIR		0.00144655	0	1	1	1	YBR143C	0	1346.77	High	0	0.0007732	2.74
	High	VAEVAVQNFITNDK		0.0461691	0	1	1	1	YBR143C	0	1547.81	High	0	0.03177	1.86
	High	DAEDNEVIK		0.0143876	0	1	1	1	YBR143C	0	1032.48	High	0	0.009107	2.12
	High	GLILAGSADFK		0.0335513	0	1	1	1	YBR143C	0	1091.61	High	0	0.02261	2.38
	High	GQIPLYQK		0.0473836	0	1	1	1	YBR143C	0	946.536	High	0	0.03266	1.87
	High	LSVLSAITSTQQK		0.0553516	0.00120145	1	1	1	YBR143C	0	1375.78	High	0.0007987	0.03875	1.74
	High	FTVDLPK		0.0512171	0.00120145	1	1	1	YBR143C	0	819.461	High	0.0007987	0.03565	1.62
	High	LVQSLEK		0.101504	0.00835654	1	1	1	YBR143C	0	816.483	High	0.005917	0.07437	1.8
	High	MLTDEYGTASNIK	1xOxidation [M1]	0.110117	0.0087043	1	1	1	YBR143C	0	1458.68	High	0.006158	0.08108	2.15
High	Master Protein	YOL058W	ARG1 SGDID:S000005419, Chr XV from 219211-220473, Genome Release 64-2-1, Verified ORF, "Arginosuccinate synthetase; catalyzes the formation of L-argininosuccinate from citrulline and L-aspartate in the arginine biosynthesis pathway; potential Cdc28p substrate"	0	14.438	19	9	9	9	1	420	46.9	5.62	16.14	9
	Confidence	Sequence	Modifications	Qvality PEP	Qvality q-value	# Protein Groups	# Proteins	# PSMs	Master Protein Accessions	# Missed Cleavages	Theo. MH+ [Da]	Confidence (by Search Engine): Sequest HT	Percolator q-Value (by Search Engine): Sequest HT	Percolator PEP (by Search Engine): Sequest HT	XCorr (by Search Engine): Sequest HT
	High	QEGCFAVSHGCTGK	2xCarbamidomethyl [C4; C11]	0.0105559	0	1	1	1	YOL058W	0	1537.65	High	0	0.006501	2.51
	High	GCYEQAPLTVLR	1xCarbamidomethyl [C2]	0.026509	0	1	1	1	YOL058W	0	1406.71	High	0	0.01754	2.32
	High	IDIVEDR		0.0206585	0	1	1	1	YOL058W	0	859.452	High	0	0.01336	2.18
	High	KAHVDLEGLTLDK		0.00471914	0	1	1	1	YOL058W	1	1438.79	High	0	0.002747	3.28
	High	LTYTDNK		0.0748757	0.00384064	1	1	1	YOL058W	0	854.425	High	0.002933	0.05355	1.36
	High	AHVDLEGLTLDK		0.0823893	0.00476234	1	1	1	YOL058W	0	1310.7	High	0.003546	0.05937	2.29
	High	GIPVAQTK		0.0808315	0.00476234	1	1	1	YOL058W	0	813.483	High	0.003546	0.05807	1.22
	High	DSFVTPNYSR		0.0866839	0.00522949	1	1	1	YOL058W	0	1185.55	High	0.003855	0.06275	1.75
	High	GNVIILGR		0.102787	0.00835654	1	1	1	YOL058W	0	841.525	High	0.005917	0.07522	1.81
High	Master Protein	YCL011C	GBP2 SGDID:S000000517, Chr III from 103358-102075, Genome Release 64-2-1, reverse complement, Verified ORF, "Poly(A+) RNA-binding protein; key surveillance factor for the selective export of spliced mRNAs from the nucleus to the cytoplasm; preference for intron-containing genes; similar to Npl3p; also binds single-stranded telomeric repeat sequence in vitro; relocalizes to the cytosol in response…	0	14.306	21	8	8	8	1	427	48.7	6.28	11.91	8
	Confidence	Sequence	Modifications	Qvality PEP	Qvality q-value	# Protein Groups	# Proteins	# PSMs	Master Protein Accessions	# Missed Cleavages	Theo. MH+ [Da]	Confidence (by Search Engine): Sequest HT	Percolator q-Value (by Search Engine): Sequest HT	Percolator PEP (by Search Engine): Sequest HT	XCorr (by Search Engine): Sequest HT
	High	NESVQDAISK		0.012123	0	1	1	1	YCL011C	0	1090.54	High	0	0.00754	1.69
	High	SDLFDLFGPIGK		0.017995	0	1	1	1	YCL011C	0	1308.68	High	0	0.01154	2.22
	High	FTEGVNPGGDR		0.00119431	0	1	1	1	YCL011C	0	1148.53	High	0	0.000629	2.57
	High	GMGTVEFTK	1xOxidation [M2]	0.0223524	0	1	1	1	YCL011C	0	985.466	High	0	0.01459	1.74
	High	FDGALFMDR	1xOxidation [M7]	0.053591	0.00120145	1	1	1	YCL011C	0	1087.49	High	0.0007987	0.03724	2.04
	High	YDQSYGGSR		0.0539387	0.00120145	1	1	1	YCL011C	0	1032.44	High	0.0007987	0.0377	1.65
	High	QDNPPPEAAK		0.0748757	0.00384064	1	1	1	YCL011C	0	1066.52	High	0.002933	0.05347	1.4
	High	GTEPGLAQDAAVHIDETAAK		0.111501	0.0087043	1	1	1	YCL011C	0	1993.98	High	0.006158	0.08244	1.59
High	Master Protein	YPR163C	TIF3 SGDID:S000006367, Chr XVI from 869955-868645, Genome Release 64-2-1, reverse complement, Verified ORF, "Translation initiation factor eIF-4B; contains an RNA recognition motif and binds to single-stranded RNA; has RNA annealing activity; interacts with Rps20p at the head of the 40S ribosomal subunit and alters the structure of the mRNA entry channel"	0	14.008	22	7	7	7	1	436	48.5	5.29	11.69	7
	Confidence	Sequence	Modifications	Qvality PEP	Qvality q-value	# Protein Groups	# Proteins	# PSMs	Master Protein Accessions	# Missed Cleavages	Theo. MH+ [Da]	Confidence (by Search Engine): Sequest HT	Percolator q-Value (by Search Engine): Sequest HT	Percolator PEP (by Search Engine): Sequest HT	XCorr (by Search Engine): Sequest HT
	High	TVYVSVAAPR		0.0101465	0	1	1	1	YPR163C	0	1062.59	High	0	0.006217	2.22
	High	ADLVAVLK		0.0087762	0	1	1	1	YPR163C	0	828.519	High	0	0.005325	2.1
	High	GSNFQGSSRPPR		0.0160911	0	1	1	1	YPR163C	0	1289.63	High	0	0.01023	2.04
	High	LDPALGGGSSDR		0.000708607	0	1	1	1	YPR163C	0	1144.56	High	0	0.0003596	2.76
	High	VDAAVEK		0.0489457	0.00120145	1	1	1	YPR163C	0	731.393	High	0.0007987	0.03393	1.51
	High	SGGFGGSFGGR		0.0564348	0.00120145	1	1	1	YPR163C	0	985.449	High	0.0007987	0.03945	1.45
	High	EREEPDIDWSAAR		0.0834437	0.00476234	1	1	1	YPR163C	1	1573.72	High	0.003546	0.06019	2.57
High	Master Protein	YGR010W	NMA2 SGDID:S000003242, Chr VII from 511545-512732, Genome Release 64-2-1, Verified ORF, "Nicotinic acid mononucleotide adenylyltransferase; catalyzes the transfer of the adenylyl moiety of ATP to nicotinamide mononucleotide to form NAD; involved in de novo and salvage synthesis of NAD(+); homolog of human NMNAT; NMA2 has a paralog, NMA1, that arose from the whole genome duplication"	0	13.778	14	5	5	1	1	395	44.9	5.9	9.54	5
	Confidence	Sequence	Modifications	Qvality PEP	Qvality q-value	# Protein Groups	# Proteins	# PSMs	Master Protein Accessions	# Missed Cleavages	Theo. MH+ [Da]	Confidence (by Search Engine): Sequest HT	Percolator q-Value (by Search Engine): Sequest HT	Percolator PEP (by Search Engine): Sequest HT	XCorr (by Search Engine): Sequest HT
	High	SFLLSHDIMYEHR	1xOxidation [M9]	0.0290549	0	2	2	1	YGR010W; YLR328W	0	1663.79	High	0	0.01932	2.02
	High	QLIYNDISSTK		0.000120578	0	2	2	1	YGR010W; YLR328W	0	1281.67	High	0	5.353e-05	2.8
	High	MCELACER	2xCarbamidomethyl [C2; C6]	0.0298257	0	2	2	1	YGR010W; YLR328W	0	1068.43	High	0	0.01985	1.11
	High	VLDHFNHEINIK		0.000308176	0	2	2	1	YGR010W; YLR328W	0	1478.78	High	0	0.0001469	2.58
	High	TIEDYEFPVHR		0.00907045	0	1	1	1	YGR010W	0	1405.67	High	0	0.005531	2.13
High	Master Protein	YKL039W	PTM1 SGDID:S000001522, Chr XI from 362622-364193, Genome Release 64-2-1, Verified ORF, "Protein of unknown function; copurifies with late Golgi vesicles containing the v-SNARE Tlg2p; PTM1 has a paralog, YHL017W, that arose from the whole genome duplication"	0	13.655	10	4	5	4	1	523	60	5.17	12.29	4
	Confidence	Sequence	Modifications	Qvality PEP	Qvality q-value	# Protein Groups	# Proteins	# PSMs	Master Protein Accessions	# Missed Cleavages	Theo. MH+ [Da]	Confidence (by Search Engine): Sequest HT	Percolator q-Value (by Search Engine): Sequest HT	Percolator PEP (by Search Engine): Sequest HT	XCorr (by Search Engine): Sequest HT
	High	NAYGQLAGTEINK		0.00510827	0	1	1	1	YKL039W	0	1378.7	High	0	0.00298	2.13
	High	SLANPIMTFSQNEVGLHDTR	1xOxidation [M7]	1.76079e-07	0	1	1	2	YKL039W	0	2246.09	High	0	4.793e-07	4.32
	High	FNAVVNFR		0.0102812	0	1	1	1	YKL039W	0	966.516	High	0	0.006316	2.35
	High	ETGFYCVTAFR	1xCarbamidomethyl [C6]	0.0355824	0	1	1	1	YKL039W	0	1350.61	High	0	0.02404	1.44
High	Master Protein	YGL253W	HXK2 SGDID:S000003222, Chr VII from 23935-25395, Genome Release 64-2-1, Verified ORF, "Hexokinase isoenzyme 2; catalyzes phosphorylation of glucose in the cytosol; predominant hexokinase during growth on glucose; functions in the nucleus to repress expression of HXK1 and GLK1 and to induce expression of its own gene; antiapoptotic; phosphorylation/dephosphorylation at serine-14 by protein kinase …	0	13.265	13	4	6	4	1	486	53.9	5.3	13.98	4
	Confidence	Sequence	Modifications	Qvality PEP	Qvality q-value	# Protein Groups	# Proteins	# PSMs	Master Protein Accessions	# Missed Cleavages	Theo. MH+ [Da]	Confidence (by Search Engine): Sequest HT	Percolator q-Value (by Search Engine): Sequest HT	Percolator PEP (by Search Engine): Sequest HT	XCorr (by Search Engine): Sequest HT
	High	IVPAEDGSGAGAAVIAALAQK		7.79557e-05	0	1	1	1	YGL253W	0	1909.04	High	0	3.367e-05	2.5
	High	ELMQQIENFEK	1xOxidation [M3]	0.000333609	0	1	1	2	YGL253W	0	1424.67	High	0	0.0001596	2.99
	High	GFDIPNIENHDVVPMLQK	1xOxidation [M15]	0.0124467	0	1	1	1	YGL253W	0	2082.03	High	0	0.007771	2.64
	High	LSVCGIAAICQK	2xCarbamidomethyl [C4; C10]	0.0499069	0.00120145	1	1	1	YGL253W	0	1319.68	High	0.0007987	0.0345	2.03
	High	ELMQQIENFEK		0.0539387	0.00120145	1	1	1	YGL253W	0	1408.68	High	0.0007987	0.03769	1.96
High	Master Protein	YBL045C	COR1 SGDID:S000000141, Chr II from 135516-134143, Genome Release 64-2-1, reverse complement, Verified ORF, "Core subunit of the ubiquinol-cytochrome c reductase complex; the ubiquinol-cytochrome c reductase complex (bc1 complex) is a component of the mitochondrial inner membrane electron transport chain"	0	13.241	15	6	6	6	1	457	50.2	7.3	11.23	6
	Confidence	Sequence	Modifications	Qvality PEP	Qvality q-value	# Protein Groups	# Proteins	# PSMs	Master Protein Accessions	# Missed Cleavages	Theo. MH+ [Da]	Confidence (by Search Engine): Sequest HT	Percolator q-Value (by Search Engine): Sequest HT	Percolator PEP (by Search Engine): Sequest HT	XCorr (by Search Engine): Sequest HT
	High	LTISVTDTEVER		0.00514211	0	1	1	1	YBL045C	0	1362.71	High	0	0.003012	3.04
	High	LSLGEAFK		0.0283038	0	1	1	1	YBL045C	0	864.483	High	0	0.01875	1.76
	High	EGLALSSNISR		0.00192185	0	1	1	1	YBL045C	0	1146.61	High	0	0.001047	2.36
	High	IDAITVK		0.0136492	0	1	1	1	YBL045C	0	759.461	High	0	0.008589	2.09
	High	LAAQIFGSYNAFEPASR		0.00524498	0	1	1	1	YBL045C	0	1841.92	High	0	0.003077	1.98
	High	QVQDFEENDHPNR		0.052902	0.00120145	1	1	1	YBL045C	0	1627.71	High	0.0007987	0.03672	1.85
High	Master Protein	YPL050C	MNN9 SGDID:S000005971, Chr XVI from 461966-460779, Genome Release 64-2-1, reverse complement, Verified ORF, "Subunit of Golgi mannosyltransferase complex; this complex mediates elongation of the polysaccharide mannan backbone; forms a separate complex with Van1p that is also involved in backbone elongation; this complex also contains Anp1p, Mnn10p, Mnn11p, and Hoc1p"	0	13.12	16	7	7	7	1	395	45.9	6.84	11.45	7
	Confidence	Sequence	Modifications	Qvality PEP	Qvality q-value	# Protein Groups	# Proteins	# PSMs	Master Protein Accessions	# Missed Cleavages	Theo. MH+ [Da]	Confidence (by Search Engine): Sequest HT	Percolator q-Value (by Search Engine): Sequest HT	Percolator PEP (by Search Engine): Sequest HT	XCorr (by Search Engine): Sequest HT
	High	QNSQSFDK		0.0149673	0	1	1	1	YPL050C	0	953.432	High	0	0.009464	2.35
	High	LHSTSEAAVNK		0.0473836	0	1	1	1	YPL050C	0	1156.6	High	0	0.03263	1.82
	High	ELIELGFITPR		0.000231949	0	1	1	1	YPL050C	0	1287.73	High	0	0.0001085	2.95
	High	AILAANIYQR		0.0302186	0	1	1	1	YPL050C	0	1132.65	High	0	0.02009	2.12
	High	HALDVQK		0.0571683	0.00120145	1	1	1	YPL050C	0	810.447	High	0.0007987	0.03998	2.2
	High	AAMALAR	1xOxidation [M3]	0.0662946	0.0022289	1	1	1	YPL050C	0	719.387	High	0.001487	0.04694	1.48
	High	ENTFYFPFTK		0.0834437	0.00476234	1	1	1	YPL050C	0	1293.62	High	0.003546	0.06009	1.55
High	Master Protein	YNL154C	YCK2 SGDID:S000005098, Chr XIV from 345276-343636, Genome Release 64-2-1, reverse complement, Verified ORF, "Palmitoylated plasma membrane-bound casein kinase I (CK1) isoform; shares redundant functions with Yck1p in morphogenesis, proper septin assembly, endocytic trafficking, and glucose sensing; stabilized by Sod1p binding in the presence of glucose and oxygen, causing glucose repression of re…	0	12.822	10	4	5	4	1	546	62	9.07	10.95	4
	Confidence	Sequence	Modifications	Qvality PEP	Qvality q-value	# Protein Groups	# Proteins	# PSMs	Master Protein Accessions	# Missed Cleavages	Theo. MH+ [Da]	Confidence (by Search Engine): Sequest HT	Percolator q-Value (by Search Engine): Sequest HT	Percolator PEP (by Search Engine): Sequest HT	XCorr (by Search Engine): Sequest HT
	High	YQLQPDDSHYDEER		0.000162336	0	1	1	1	YNL154C	0	1794.76	High	0	7.408e-05	2.77
	High	VQQQQLQQAQAQQQANR		2.79897e-05	0	1	1	1	YNL154C	0	1995.01	High	0	1.122e-05	4.17
	High	YMSINTHLGR	1xOxidation [M2]	0.0586631	0.00120145	1	2	1	YNL154C	0	1207.59	High	0.0007987	0.04117	2.08
	High	DDSTIVGLHYK		0.0697861	0.0022289	1	2	2	YNL154C	0	1247.63	High	0.001487	0.04967	1.93
High	Master Protein	YBL075C	SSA3 SGDID:S000000171, Chr II from 86448-84499, Genome Release 64-2-1, reverse complement, Verified ORF, "ATPase involved in protein folding and the response to stress; plays a role in SRP-dependent cotranslational protein-membrane targeting and translocation; member of the heat shock protein 70 (HSP70) family; localized to the cytoplasm; SSA3 has a paralog, SSA4, that arose from the whole genome…	0	12.772	9	5	5	1	1	649	70.5	5.17	8.3	5
	Confidence	Sequence	Modifications	Qvality PEP	Qvality q-value	# Protein Groups	# Proteins	# PSMs	Master Protein Accessions	# Missed Cleavages	Theo. MH+ [Da]	Confidence (by Search Engine): Sequest HT	Percolator q-Value (by Search Engine): Sequest HT	Percolator PEP (by Search Engine): Sequest HT	XCorr (by Search Engine): Sequest HT
	High	IINEPTAAAIAYGLDKK		0.000904874	0	2	4	1	YBL075C; YLL024C	1	1787.99	High	0	0.000466	3.35
	High	LIGDAAK		0.0441164	0	4	7	1	YJL034W; YBL075C; YLL024C; YDL229W	0	687.404	High	0	0.03021	1.45
	High	STLEPVEK		0.0298257	0	1	2	1	YBL075C	0	902.483	High	0	0.0198	1.38
	High	FEELCADLFR	1xCarbamidomethyl [C5]	0.0246645	0	2	4	1	YBL075C; YLL024C	0	1299.6	High	0	0.01618	1.83
	High	ATAGDTHLGGEDFDNR		8.60791e-05	0	2	3	1	YBL075C; YLL024C	0	1675.73	High	0	3.745e-05	3.13
High	Master Protein	YDR257C	RKM4 SGDID:S000002665, Chr IV from 971474-969990, Genome Release 64-2-1, reverse complement, Verified ORF, "Ribosomal lysine methyltransferase; specific for monomethylation of Rpl42ap and Rpl42bp (lysine 55); nuclear SET-domain containing protein"	0	12.767	16	7	7	7	1	494	57.3	5.05	8.93	7
	Confidence	Sequence	Modifications	Qvality PEP	Qvality q-value	# Protein Groups	# Proteins	# PSMs	Master Protein Accessions	# Missed Cleavages	Theo. MH+ [Da]	Confidence (by Search Engine): Sequest HT	Percolator q-Value (by Search Engine): Sequest HT	Percolator PEP (by Search Engine): Sequest HT	XCorr (by Search Engine): Sequest HT
	High	NEQVYNIYGEHPNSELLR		0.0234033	0	1	1	1	YDR257C	0	2175.05	High	0	0.01527	1.9
	High	QIGGEFSR		0.0410698	0	1	1	1	YDR257C	0	893.448	High	0	0.02802	1.45
	High	TTAEIEVSPK		0.000128815	0	1	1	1	YDR257C	0	1074.57	High	0	5.775e-05	2.89
	High	CVSIEKPSK	1xCarbamidomethyl [C1]	0.0486293	0.000644996	1	1	1	YDR257C	0	1047.55	High	0.0007987	0.0336	2.29
	High	SEIDSLQVCEETIDK	1xCarbamidomethyl [C9]	0.0671514	0.0022289	1	1	1	YDR257C	0	1765.82	High	0.001487	0.04774	0.98
	High	YGYVEWDGSK		0.0861357	0.00522949	1	1	1	YDR257C	0	1203.53	High	0.003855	0.06244	1.82
	High	LLTNILK		0.0947122	0.00719071	1	1	1	YDR257C	0	814.54	High	0.005416	0.06904	1.93
High	Master Protein	IPI00328103 IPI:IPI00328103.1	TREMBL:Q7Z3Y8 REFSEQ_NP:NP_853515|ENSEMBL:ENSP00000301656 Tax_Id=9606 Type I inner root sheath specific keratin 25 irs3	0	12.693	9	4	23	2	1	459	49.8	5.14	49.08	4
	Confidence	Sequence	Modifications	Qvality PEP	Qvality q-value	# Protein Groups	# Proteins	# PSMs	Master Protein Accessions	# Missed Cleavages	Theo. MH+ [Da]	Confidence (by Search Engine): Sequest HT	Percolator q-Value (by Search Engine): Sequest HT	Percolator PEP (by Search Engine): Sequest HT	XCorr (by Search Engine): Sequest HT
	High	VTMQNLNDR	1xOxidation [M3]	0.00189662	0	4	8	17	IPI00384444 IPI:IPI00384444.4; IPI00328103 IPI:IPI00328103.1; sp; IPI00217963 IPI:IPI00217963.2	0	1106.53	High	0	0.002274	2.78
	High	VTMQNLNDR		0.00497513	0	4	8	1	IPI00384444 IPI:IPI00384444.4; IPI00328103 IPI:IPI00328103.1; sp; IPI00217963 IPI:IPI00217963.2	0	1090.53	High	0	0.002896	2.26
	High	ALEEANADLEQK		0.00103957	0	1	1	1	IPI00328103 IPI:IPI00328103.1	0	1330.65	High	0	0.0005421	2.25
	High	DAEAWFNEK		0.00630988	0	2	5	3	IPI00328103 IPI:IPI00328103.1; sp	0	1109.49	High	0	0.003748	2.72
	High	GYGGPGNQTK		0.0483149	0	1	1	1	IPI00328103 IPI:IPI00328103.1	0	978.464	High	0.0004275	0.03335	1.53
High	Master Protein	YKL081W	TEF4 SGDID:S000001564, Chr XI from 282891-283095,283422-284455, Genome Release 64-2-1, Verified ORF, "Gamma subunit of translational elongation factor eEF1B; stimulates the binding of aminoacyl-tRNA (AA-tRNA) to ribosomes by releasing eEF1A (Tef1p/Tef2p) from the ribosomal complex"	0	12.655	18	7	7	7	1	412	46.5	7.87	9.85	7
	Confidence	Sequence	Modifications	Qvality PEP	Qvality q-value	# Protein Groups	# Proteins	# PSMs	Master Protein Accessions	# Missed Cleavages	Theo. MH+ [Da]	Confidence (by Search Engine): Sequest HT	Percolator q-Value (by Search Engine): Sequest HT	Percolator PEP (by Search Engine): Sequest HT	XCorr (by Search Engine): Sequest HT
	High	NYASEALISYFK		0.000581179	0	1	1	1	YKL081W	0	1405.7	High	0	0.0002912	2.69
	High	WFNTVAASPIVK		0.0270353	0	1	1	1	YKL081W	0	1332.73	High	0	0.01784	1.89
	High	IDNLAAVFDAR		0.0100798	0	1	1	1	YKL081W	0	1204.63	High	0	0.006178	2.27
	High	KDEAKPADDAAPAK		0.0461691	0	1	1	1	YKL081W	1	1426.72	High	0	0.03168	3.01
	High	LLGSDVIEK		0.0748757	0.00384064	1	1	1	YKL081W	0	973.556	High	0.002933	0.05356	1.56
	High	TPFAEVK		0.0839756	0.00476234	1	1	1	YKL081W	0	791.43	High	0.003546	0.0606	1.18
	High	HPLEALGK		0.0923497	0.00669635	1	1	1	YKL081W	0	864.494	High	0.004826	0.0671	1.44
High	Master Protein	YKL096W	CWP1 SGDID:S000001579, Chr XI from 261132-261851, Genome Release 64-2-1, Verified ORF, "Cell wall mannoprotein that localizes to birth scars of daughter cells; linked to a beta-1,3- and beta-1,6-glucan heteropolymer through a phosphodiester bond; required for propionic acid resistance"	0	12.301	24	4	4	4	1	239	24.3	4.67	9.37	4
	Confidence	Sequence	Modifications	Qvality PEP	Qvality q-value	# Protein Groups	# Proteins	# PSMs	Master Protein Accessions	# Missed Cleavages	Theo. MH+ [Da]	Confidence (by Search Engine): Sequest HT	Percolator q-Value (by Search Engine): Sequest HT	Percolator PEP (by Search Engine): Sequest HT	XCorr (by Search Engine): Sequest HT
	High	LGSGSGSFEATITDDGK		4.51729e-06	0	1	1	1	YKL096W	0	1641.76	High	0	1.583e-06	2.73
	High	EGSESDAATGFSIK		0.0251545	0	1	1	1	YKL096W	0	1398.64	High	0	0.01654	1.65
	High	FDDDKYAVVNEDGSFK		0.00293321	0	1	1	1	YKL096W	1	1848.83	High	0	0.001651	3.18
	High	DGSSYIFSSK		0.0181138	0	1	1	1	YKL096W	0	1090.51	High	0	0.01158	1.81
High	Master Protein	IPI00290078 IPI:IPI00290078.2	SWISS-PROT:P19013 TREMBL:Q6PIN2;Q9BTL1;Q6GTR8;Q9UEK9|REFSEQ_NP:NP_002263|ENSEMBL:ENSP00000293774|H-INV:HIT000018587;HIT000022952;HIT000012868 Tax_Id=9606 Keratin, type II cytoskeletal 4	0	12.3	8	5	9	1	1	608	65	8.25	21.28	5
	Confidence	Sequence	Modifications	Qvality PEP	Qvality q-value	# Protein Groups	# Proteins	# PSMs	Master Protein Accessions	# Missed Cleavages	Theo. MH+ [Da]	Confidence (by Search Engine): Sequest HT	Percolator q-Value (by Search Engine): Sequest HT	Percolator PEP (by Search Engine): Sequest HT	XCorr (by Search Engine): Sequest HT
	High	AEAEALYQTK		0.000585032	0	4	7	1	IPI00290078 IPI:IPI00290078.2; IPI00290857 IPI:IPI00290857.1; IPI00166205 IPI:IPI00166205.2; IPI00329306 IPI:IPI00329306.2	0	1123.56	High	0	0.0002924	2.69
	High	AQYEEIAQR		0.00369611	0	4	7	2	IPI00290078 IPI:IPI00290078.2; IPI00300725 IPI:IPI00300725.6; sp; IPI00293665 IPI:IPI00293665.6	0	1107.54	High	0	0.002118	2.6
	High	LALDLEIATYR		0.000577351	0	3	7	4	IPI00290078 IPI:IPI00290078.2; IPI00431749 IPI:IPI00431749.1; IPI00556624 IPI:IPI00556624.1	0	1277.71	High	0	0.0002873	3.58
	High	FASFIDK		0.052902	0.00120145	9	22	3	IPI00290078 IPI:IPI00290078.2; IPI00290857 IPI:IPI00290857.1; IPI00300725 IPI:IPI00300725.6; IPI00556242 IPI:IPI00556242.1; sp; IPI00009867 IPI:IPI00009867.2; IPI00329306 IPI:IPI00329306.2; IPI00293665 IPI:IPI00293665.6; IPI00376379 IPI:IPI00376379.1	0	827.43	High	0.003546	0.05897	2.12
	High	SISMSVAGSR	1xOxidation [M4]	0.104085	0.00835654	1	1	1	IPI00290078 IPI:IPI00290078.2	0	1010.49	High	0.005917	0.07648	2.05
High	Master Protein	YNL268W	LYP1 SGDID:S000005212, Chr XIV from 138550-140385, Genome Release 64-2-1, Verified ORF, "Lysine permease; one of three amino acid permeases (Alp1p, Can1p, Lyp1p) responsible for uptake of cationic amino acids"	0	12.297	11	5	5	5	1	611	68	6.99	10.27	5
	Confidence	Sequence	Modifications	Qvality PEP	Qvality q-value	# Protein Groups	# Proteins	# PSMs	Master Protein Accessions	# Missed Cleavages	Theo. MH+ [Da]	Confidence (by Search Engine): Sequest HT	Percolator q-Value (by Search Engine): Sequest HT	Percolator PEP (by Search Engine): Sequest HT	XCorr (by Search Engine): Sequest HT
	High	NPGAWGPGIISSDK		9.01545e-05	0	1	2	1	YNL268W	0	1398.7	High	0	3.923e-05	3.03
	High	LQVVSHETDINEDEEEAHYEDK		0.00270967	0	1	1	1	YNL268W	0	2629.15	High	0	0.001514	3.08
	High	FSNIITSNK		0.0042741	0	1	1	1	YNL268W	0	1023.55	High	0	0.002473	2.01
	High	EIEAIIWEDDEPK		0.068897	0.0022289	1	1	1	YNL268W	0	1586.76	High	0.001487	0.049	2.15
	High	QFGYVTR		0.0959146	0.00757788	1	1	1	YNL268W	0	870.447	High	0.005416	0.07005	1.58
High	Master Protein	YDR083W	RRP8 SGDID:S000002490, Chr IV from 612073-613251, Genome Release 64-2-1, Verified ORF, "Nucleolar S-adenosylmethionine-dependent rRNA methyltransferase; methylates adenine (m1A) of the large subunit (LSU) rRNA at position 645; involved in pre-rRNA cleavage at site A2; mutation is synthetically lethal with a gar1 mutation; deletion disrupts telomere maintenance by influencing the expression of nei…	0	12.228	19	8	8	8	1	392	46	9.42	7.42	8
	Confidence	Sequence	Modifications	Qvality PEP	Qvality q-value	# Protein Groups	# Proteins	# PSMs	Master Protein Accessions	# Missed Cleavages	Theo. MH+ [Da]	Confidence (by Search Engine): Sequest HT	Percolator q-Value (by Search Engine): Sequest HT	Percolator PEP (by Search Engine): Sequest HT	XCorr (by Search Engine): Sequest HT
	High	ITVADIR		0.0438305	0	1	1	1	YDR083W	0	787.467	High	0	0.03001	1.59
	High	EQVEDIPSEGSVAK		0.0235574	0	1	1	1	YDR083W	0	1487.72	High	0	0.01545	1.79
	High	ENIEKPTK		0.0157765	0	1	1	1	YDR083W	0	958.52	High	0	0.01003	2.13
	High	FEFFKPPAEIIEER		0.0175278	0	1	1	1	YDR083W	0	1751.9	High	0	0.01126	1.55
	High	VHSFDLK		0.0605848	0.0022289	1	1	1	YDR083W	0	845.452	High	0.001487	0.04274	1.57
	High	GELWIAEIK		0.0609764	0.0022289	1	1	1	YDR083W	0	1058.59	High	0.001487	0.04284	1.81
	High	QLTPLQQK		0.106061	0.00835654	1	1	1	YDR083W	0	955.557	High	0.005917	0.07777	1.68
	High	TVAFDNK		0.107397	0.00835654	1	1	1	YDR083W	0	794.404	High	0.005917	0.07928	1.41
High	Master Protein	YHR183W	GND1 SGDID:S000001226, Chr VIII from 470960-472429, Genome Release 64-2-1, Verified ORF, "6-phosphogluconate dehydrogenase (decarboxylating); catalyzes an NADPH regenerating reaction in the pentose phosphate pathway; required for growth on D-glucono-delta-lactone and adaptation to oxidative stress; GND1 has a paralog, GND2, that arose from the whole genome duplication"	0	12.196	17	8	8	8	1	489	53.5	6.64	17.97	8
	Confidence	Sequence	Modifications	Qvality PEP	Qvality q-value	# Protein Groups	# Proteins	# PSMs	Master Protein Accessions	# Missed Cleavages	Theo. MH+ [Da]	Confidence (by Search Engine): Sequest HT	Percolator q-Value (by Search Engine): Sequest HT	Percolator PEP (by Search Engine): Sequest HT	XCorr (by Search Engine): Sequest HT
	High	IISYAQGFMLIR	1xOxidation [M9]	0.0241838	0	1	2	1	YHR183W	0	1427.77	High	0	0.01583	1.98
	High	LPANLLQAQR		0.0118076	0	1	2	1	YHR183W	0	1123.66	High	0	0.007356	2.73
	High	VDHFLANEAK		0.0241838	0	1	1	1	YHR183W	0	1143.58	High	0	0.01584	2.49
	High	AYREEPDLENLLFNK		0.052902	0.00120145	1	1	1	YHR183W	1	1850.93	High	0.0007987	0.03669	2.67
	High	FDDVDGKPLVEK		0.0625673	0.0022289	1	2	1	YHR183W	0	1361.69	High	0.001487	0.04399	2.09
	High	SIIGATSIEDFISK		0.0720571	0.0022289	1	1	1	YHR183W	0	1480.79	High	0.001487	0.05139	1.86
	High	LNNPAIALMWR	1xOxidation [M9]	0.0829149	0.00476234	1	2	1	YHR183W	0	1314.7	High	0.003546	0.05956	2.26
	High	EEPDLENLLFNK		0.0959146	0.00757788	1	1	1	YHR183W	0	1460.73	High	0.005416	0.06986	1.89
High	Master Protein	YDL185W	VMA1 SGDID:S000002344, Chr IV from 126787-130002, Genome Release 64-2-1, Verified ORF, "Subunit A of the V1 peripheral membrane domain of V-ATPase; protein precursor undergoes self-catalyzed splicing to yield the extein Tfp1p and the intein Vde (PI-SceI), which is a site-specific endonuclease; the V1 peripheral membrane domain of the vacuolar H+-ATPase (V-ATPase) has eight subunits; involved in m…	0	12.023	7	6	6	6	1	1071	118.6	6.16	6.88	6
	Confidence	Sequence	Modifications	Qvality PEP	Qvality q-value	# Protein Groups	# Proteins	# PSMs	Master Protein Accessions	# Missed Cleavages	Theo. MH+ [Da]	Confidence (by Search Engine): Sequest HT	Percolator q-Value (by Search Engine): Sequest HT	Percolator PEP (by Search Engine): Sequest HT	XCorr (by Search Engine): Sequest HT
	High	SLGLVVSVNAEPAK		0.000554908	0	1	1	1	YDL185W	0	1383.78	High	0	0.0002753	2.8
	High	FTCNATHELVVR	1xCarbamidomethyl [C3]	0.00162924	0	1	1	1	YDL185W	0	1446.72	High	0	0.0008794	2
	High	ANELVESYR		0.0470771	0	1	1	1	YDL185W	0	1080.53	High	0	0.03255	2.18
	High	ATFSVDSR		0.0286769	0	1	1	1	YDL185W	0	882.432	High	0	0.019	1.9
	High	TVNLYSK		0.105398	0.00835654	1	1	1	YDL185W	0	824.451	High	0.005917	0.07731	1.4
	High	ETFLAGLIDSDGYVTDEHGIK		0.110807	0.0087043	1	1	1	YDL185W	0	2280.1	High	0.006158	0.08194	1.82
High	Master Protein	YJL111W	CCT7 SGDID:S000003647, Chr X from 207877-209529, Genome Release 64-2-1, Verified ORF, "Subunit of the cytosolic chaperonin Cct ring complex; related to Tcp1p, required for the assembly of actin and tubulins in vivo; mutant has increased aneuploidy tolerance"	0	11.897	14	6	7	6	1	550	59.7	5.55	10.92	6
	Confidence	Sequence	Modifications	Qvality PEP	Qvality q-value	# Protein Groups	# Proteins	# PSMs	Master Protein Accessions	# Missed Cleavages	Theo. MH+ [Da]	Confidence (by Search Engine): Sequest HT	Percolator q-Value (by Search Engine): Sequest HT	Percolator PEP (by Search Engine): Sequest HT	XCorr (by Search Engine): Sequest HT
	High	LIVAGGGATEMEVSK		0.0344396	0	1	1	1	YJL111W	0	1461.76	High	0	0.02324	2.23
	High	INELAVDITSEK		0.00205311	0	1	1	1	YJL111W	0	1331.71	High	0	0.001121	2.9
	High	LIVAGGGATEMEVSK	1xOxidation [M11]	0.0392394	0	1	1	1	YJL111W	0	1477.76	High	0	0.02667	1.81
	High	YNLFQGCPQAK	1xCarbamidomethyl [C7]	0.0203888	0	1	1	1	YJL111W	0	1325.63	High	0	0.01321	2.2
	High	TTISNDGATILK		0.0560715	0.00120145	1	1	1	YJL111W	0	1233.67	High	0.0007987	0.0393	1.32
	High	LPIGDLATQFFADR		0.0782971	0.004336	1	1	1	YJL111W	0	1563.82	High	0.003264	0.05634	1.49
	High	GGAEQVIAEVER		0.0861357	0.00522949	1	1	1	YJL111W	0	1257.64	High	0.003855	0.06244	1.78
High	Master Protein	YJR117W	STE24 SGDID:S000003878, Chr X from 642007-643368, Genome Release 64-2-1, Verified ORF, "Highly conserved zinc metalloprotease; functions in two steps of a-factor maturation, C-terminal CAAX proteolysis and the first step of N-terminal proteolytic processing; contains multiple transmembrane spans"	0	11.766	19	7	7	7	1	453	52.3	7.91	14.19	7
	Confidence	Sequence	Modifications	Qvality PEP	Qvality q-value	# Protein Groups	# Proteins	# PSMs	Master Protein Accessions	# Missed Cleavages	Theo. MH+ [Da]	Confidence (by Search Engine): Sequest HT	Percolator q-Value (by Search Engine): Sequest HT	Percolator PEP (by Search Engine): Sequest HT	XCorr (by Search Engine): Sequest HT
	High	NLSTMNVDPLYSSYHYSHPTLAER	1xOxidation [M5]	0.0367626	0	1	1	1	YJR117W	0	2811.3	High	0	0.02486	2.62
	High	SSHSNAYFTGLPFTSK		0.0410698	0	1	1	1	YJR117W	0	1743.83	High	0	0.02799	3.07
	High	SIESLADR		0.0240257	0	1	1	1	YJR117W	0	890.458	High	0	0.01578	1.77
	High	FTPLEDGELKK		0.00821595	0	1	1	1	YJR117W	1	1276.68	High	0	0.00499	1.99
	High	IFVIDGSK		0.0365235	0	1	1	1	YJR117W	0	878.498	High	0	0.02469	1.92
	High	LTALDYVSEK		0.0499069	0.00120145	1	1	1	YJR117W	0	1138.6	High	0.0007987	0.03448	2.05
	High	THEYQADAYAK		0.052902	0.00120145	1	1	1	YJR117W	0	1296.59	High	0.0007987	0.03673	2.76
High	Master Protein	sp	ADH1_YEAST	0	11.735	20	5	5	5	1	348	36.8	6.74	7.88	5
	Confidence	Sequence	Modifications	Qvality PEP	Qvality q-value	# Protein Groups	# Proteins	# PSMs	Master Protein Accessions	# Missed Cleavages	Theo. MH+ [Da]	Confidence (by Search Engine): Sequest HT	Percolator q-Value (by Search Engine): Sequest HT	Percolator PEP (by Search Engine): Sequest HT	XCorr (by Search Engine): Sequest HT
	High	LPLVGGHEGAGVVVGMGENVK	1xOxidation [M16]	3.84378e-05	0	1	3	1	sp	0	2035.06	High	0	1.571e-05	4
	High	VVGLSTLPEIYEK		0.0212085	0	1	2	1	sp	0	1447.8	High	0	0.01377	1.99
	High	SISIVGSYVGNR		0.00444685	0	1	3	1	sp	0	1251.67	High	0	0.002569	1.89
	High	YVVDTSK		0.0777994	0.004336	1	4	1	sp	0	811.42	High	0.003264	0.05568	1.48
	High	VLGIDGGEGKEELFR		0.0823893	0.00476234	1	2	1	sp	1	1618.84	High	0.003546	0.05944	1.46
High	Master Protein	IPI00329306 IPI:IPI00329306.2	TREMBL:Q7RTS7 ENSEMBL:ENSP00000346269 Tax_Id=9606 Keratin 5c	0	11.667	7	4	8	1	1	543	59.3	7.65	19.55	4
	Confidence	Sequence	Modifications	Qvality PEP	Qvality q-value	# Protein Groups	# Proteins	# PSMs	Master Protein Accessions	# Missed Cleavages	Theo. MH+ [Da]	Confidence (by Search Engine): Sequest HT	Percolator q-Value (by Search Engine): Sequest HT	Percolator PEP (by Search Engine): Sequest HT	XCorr (by Search Engine): Sequest HT
	High	LLEGEECR	1xCarbamidomethyl [C7]	0.0178771	0	6	13	1	IPI00300725 IPI:IPI00300725.6; sp; IPI00009867 IPI:IPI00009867.2; IPI00166205 IPI:IPI00166205.2; IPI00329306 IPI:IPI00329306.2; IPI00293665 IPI:IPI00293665.6	0	1005.47	High	0	0.01144	1.98
	High	FLEQQNQVLETK		4.24432e-05	0	1	5	3	IPI00329306 IPI:IPI00329306.2	0	1476.77	High	0	1.748e-05	3.73
	High	AEAEALYQTK		0.000585032	0	4	7	1	IPI00290078 IPI:IPI00290078.2; IPI00290857 IPI:IPI00290857.1; IPI00166205 IPI:IPI00166205.2; IPI00329306 IPI:IPI00329306.2	0	1123.56	High	0	0.0002924	2.69
	High	FASFIDK		0.052902	0.00120145	9	22	3	IPI00290078 IPI:IPI00290078.2; IPI00290857 IPI:IPI00290857.1; IPI00300725 IPI:IPI00300725.6; IPI00556242 IPI:IPI00556242.1; sp; IPI00009867 IPI:IPI00009867.2; IPI00329306 IPI:IPI00329306.2; IPI00293665 IPI:IPI00293665.6; IPI00376379 IPI:IPI00376379.1	0	827.43	High	0.003546	0.05897	2.12
High	Master Protein	YMR033W	ARP9 SGDID:S000004636, Chr XIII from 337788-337817,337904-339277, Genome Release 64-2-1, Verified ORF, "Component of both the SWI/SNF and RSC chromatin remodeling complexes; actin-related protein involved in transcriptional regulation"	0	11.565	11	5	5	5	1	467	53	5.15	8.1	5
	Confidence	Sequence	Modifications	Qvality PEP	Qvality q-value	# Protein Groups	# Proteins	# PSMs	Master Protein Accessions	# Missed Cleavages	Theo. MH+ [Da]	Confidence (by Search Engine): Sequest HT	Percolator q-Value (by Search Engine): Sequest HT	Percolator PEP (by Search Engine): Sequest HT	XCorr (by Search Engine): Sequest HT
	High	QDSILIIYPR		0.0213482	0	1	1	1	YMR033W	0	1217.69	High	0	0.01391	1.5
	High	LIFVSILSDR		0.00988239	0	1	1	1	YMR033W	0	1162.68	High	0	0.006056	2.55
	High	SPIFEVLSDDAK		0.000495944	0	1	1	1	YMR033W	0	1320.67	High	0	0.0002447	2.86
	High	DHLIIEPEEEK		0.00319623	0	1	1	1	YMR033W	0	1351.67	High	0	0.001801	2.69
	High	DTFYITR		0.100237	0.00757788	1	1	1	YMR033W	0	915.457	High	0.005416	0.07335	1.49
High	Master Protein	YHR066W	SSF1 SGDID:S000001108, Chr VIII from 229335-230696, Genome Release 64-2-1, Verified ORF, "Constituent of 66S pre-ribosomal particles; required for ribosomal large subunit maturation; functionally redundant with Ssf2p; member of the Brix family; SSF1 has a paralog, SSF2, that arose from the whole genome duplication"	0	11.516	10	4	4	4	1	453	51.7	9.26	10.28	4
	Confidence	Sequence	Modifications	Qvality PEP	Qvality q-value	# Protein Groups	# Proteins	# PSMs	Master Protein Accessions	# Missed Cleavages	Theo. MH+ [Da]	Confidence (by Search Engine): Sequest HT	Percolator q-Value (by Search Engine): Sequest HT	Percolator PEP (by Search Engine): Sequest HT	XCorr (by Search Engine): Sequest HT
	High	SGEDDQDVNVEK		0.000458135	0	1	1	1	YHR066W	0	1334.57	High	0	0.0002252	2.15
	High	VGQTSLANHSLNQLVK		3.48104e-05	0	1	2	1	YHR066W	0	1708.93	High	0	1.415e-05	3.83
	High	VLHHEFVQK		0.0458702	0	1	2	1	YHR066W	0	1136.62	High	0	0.0315	2.54
	High	TSLNSLK		0.0441164	0	1	3	2	YHR066W	0	762.436	High	0	0.03033	1.76
High	Master Protein	YJL014W	CCT3 SGDID:S000003551, Chr X from 407558-409162, Genome Release 64-2-1, Verified ORF, "Subunit of the cytosolic chaperonin Cct ring complex; related to Tcp1p, required for the assembly of actin and tubulins in vivo; capable of binding Q/N rich proteins and mediating their folding"	0	11.299	11	6	6	6	1	534	58.8	6.11	11.95	6
	Confidence	Sequence	Modifications	Qvality PEP	Qvality q-value	# Protein Groups	# Proteins	# PSMs	Master Protein Accessions	# Missed Cleavages	Theo. MH+ [Da]	Confidence (by Search Engine): Sequest HT	Percolator q-Value (by Search Engine): Sequest HT	Percolator PEP (by Search Engine): Sequest HT	XCorr (by Search Engine): Sequest HT
	High	QAQISNITAAK		0.00210809	0	1	1	1	YJL014W	0	1144.63	High	0	0.001152	2.08
	High	NLQDAMAVAR	1xOxidation [M6]	0.0308176	0	1	1	1	YJL014W	0	1104.55	High	0	0.02058	2.28
	High	IPGGDVLDSR		0.00171767	0	1	1	1	YJL014W	0	1028.54	High	0	0.000926	1.84
	High	VDDIVSGVR		0.0671514	0.0022289	1	1	1	YJL014W	0	959.516	High	0.001487	0.04766	1.81
	High	ALTDALEVIK		0.0906143	0.00669635	1	1	1	YJL014W	0	1072.62	High	0.004826	0.06567	2.14
	High	VTGATIVNR		0.100237	0.00757788	1	1	1	YJL014W	0	930.537	High	0.005416	0.07315	1.81
High	Master Protein	YOL018C	TLG2 SGDID:S000005378, Chr XV from 292074-290881, Genome Release 64-2-1, reverse complement, Verified ORF, "Syntaxin-like t-SNARE; forms a complex with Tlg1p and Vti1p and mediates fusion of endosome-derived vesicles with the late Golgi; binds Vps45p, which prevents Tlg2p degradation and also facilitates t-SNARE complex formation; homologous to mammalian SNARE protein syntaxin 16 (Sx16)"	0	11.005	19	6	6	6	1	397	45.8	5.26	7.37	6
	Confidence	Sequence	Modifications	Qvality PEP	Qvality q-value	# Protein Groups	# Proteins	# PSMs	Master Protein Accessions	# Missed Cleavages	Theo. MH+ [Da]	Confidence (by Search Engine): Sequest HT	Percolator q-Value (by Search Engine): Sequest HT	Percolator PEP (by Search Engine): Sequest HT	XCorr (by Search Engine): Sequest HT
	High	TNLFLSYR		0.0296311	0	1	1	1	YOL018C	0	1013.54	High	0	0.01979	1.66
	High	EGLDIEDYSK		0.00598531	0	1	1	1	YOL018C	0	1168.54	High	0	0.003553	1.44
	High	ASAENTLLLDDEEEEAAR		0.0188426	0	1	1	1	YOL018C	0	1975.91	High	0	0.01215	1.52
	High	IDYNLENTVVELK		0.0110545	0	1	1	1	YOL018C	0	1549.81	High	0	0.00683	1.98
	High	GVLEVSTIFR		0.0505579	0.00120145	1	1	1	YOL018C	0	1120.64	High	0.0007987	0.03502	1.89
	High	EMQDLVVDQGTIVDR	1xOxidation [M2]	0.0680188	0.0022289	1	1	1	YOL018C	0	1733.84	High	0.001487	0.04835	1.85
High	Master Protein	YIL142W	CCT2 SGDID:S000001404, Chr IX from 83302-84885, Genome Release 64-2-1, Verified ORF, "Subunit beta of the cytosolic chaperonin Cct ring complex; related to Tcp1p, required for the assembly of actin and tubulins in vivo"	0	10.946	12	5	5	5	1	527	57.2	6.11	7.15	5
	Confidence	Sequence	Modifications	Qvality PEP	Qvality q-value	# Protein Groups	# Proteins	# PSMs	Master Protein Accessions	# Missed Cleavages	Theo. MH+ [Da]	Confidence (by Search Engine): Sequest HT	Percolator q-Value (by Search Engine): Sequest HT	Percolator PEP (by Search Engine): Sequest HT	XCorr (by Search Engine): Sequest HT
	High	LSDSFLDEGFILAK		0.00250316	0	1	1	1	YIL142W	0	1554.81	High	0	0.001385	2.69
	High	GATDQTLDEAER		0.00571503	0	1	1	1	YIL142W	0	1305.59	High	0	0.00337	2.35
	High	AVDTEAQNIDGK		0.00419026	0	1	1	1	YIL142W	0	1260.61	High	0	0.002421	2.12
	High	LASAAALDALTK		0.0220608	0	1	1	1	YIL142W	0	1144.66	High	0	0.01436	1.55
	High	LSAFVGAIAVGDLVK		0.0959146	0.00757788	1	1	1	YIL142W	0	1459.85	High	0.005416	0.06977	1.47
High	Master Protein	YER178W	PDA1 SGDID:S000000980, Chr V from 546817-548079, Genome Release 64-2-1, Verified ORF, "E1 alpha subunit of the pyruvate dehydrogenase (PDH) complex; catalyzes the direct oxidative decarboxylation of pyruvate to acetyl-CoA; phosphorylated; regulated by glucose; PDH complex is concentrated in spots within the mitochondrial matrix, often near the ERMES complex and near peroxisomes"	0	10.899	15	6	6	6	1	420	46.3	8.1	9.1	6
	Confidence	Sequence	Modifications	Qvality PEP	Qvality q-value	# Protein Groups	# Proteins	# PSMs	Master Protein Accessions	# Missed Cleavages	Theo. MH+ [Da]	Confidence (by Search Engine): Sequest HT	Percolator q-Value (by Search Engine): Sequest HT	Percolator PEP (by Search Engine): Sequest HT	XCorr (by Search Engine): Sequest HT
	High	YGMGTAASR	1xOxidation [M3]	0.0296311	0	1	1	1	YER178W	0	929.415	High	0	0.01966	1.38
	High	SSAMTEYFK	1xOxidation [M4]	0.00643607	0	1	1	1	YER178W	0	1079.47	High	0	0.003817	2.09
	High	GTETPTLR		0.0154681	0	1	1	1	YER178W	0	874.463	High	0	0.009822	1.47
	High	KYVDEQVELADAAPPPEAK		0.0115764	0	1	1	1	YER178W	1	2070.04	High	0	0.007167	3
	High	LSILFEDVYVK		0.0571683	0.00120145	1	1	1	YER178W	0	1325.74	High	0.0007987	0.04015	2.36
	High	ATLLQMYK	1xOxidation [M6]	0.0823893	0.00476234	1	1	1	YER178W	0	983.523	High	0.003546	0.05951	1.66
High	Master Protein	YPL063W	TIM50 SGDID:S000005984, Chr XVI from 429939-431369, Genome Release 64-2-1, Verified ORF, "Essential component of the TIM23 complex; acts as receptor for the translocase of the inner mitochondrial membrane (TIM23) complex guiding incoming precursors from the TOM complex; may control the gating of the Tim23p-Tim17p channel"	0	10.723	15	6	6	6	1	476	55.1	7.24	9.82	6
	Confidence	Sequence	Modifications	Qvality PEP	Qvality q-value	# Protein Groups	# Proteins	# PSMs	Master Protein Accessions	# Missed Cleavages	Theo. MH+ [Da]	Confidence (by Search Engine): Sequest HT	Percolator q-Value (by Search Engine): Sequest HT	Percolator PEP (by Search Engine): Sequest HT	XCorr (by Search Engine): Sequest HT
	High	VIIIDTDPNSYK		0.0292457	0	1	1	1	YPL063W	0	1377.73	High	0	0.01941	1.66
	High	DVRPILNSFEDKK		0.00160785	0	1	1	1	YPL063W	1	1560.84	High	0	0.0008628	4
	High	AGVDVDEK		0.0133822	0	1	1	1	YPL063W	0	832.405	High	0	0.008383	2.03
	High	LIPFLEYLATQQTK		0.0518847	0.00120145	1	1	1	YPL063W	0	1664.93	High	0.0007987	0.03601	1.18
	High	IQQEQMGGQTFTLK		0.0798085	0.00476234	1	1	1	YPL063W	0	1608.81	High	0.003546	0.05752	1.14
	High	FPLDLIHEEGQK		0.0894745	0.00571894	1	1	1	YPL063W	0	1425.74	High	0.004518	0.06502	2.13
High	Master Protein	YJL034W	KAR2 SGDID:S000003571, Chr X from 381327-383375, Genome Release 64-2-1, Verified ORF, "ATPase involved in protein import into the ER; also acts as a chaperone to mediate protein folding in the ER and may play a role in ER export of soluble proteins; regulates the unfolded protein response via interaction with Ire1p"	0	10.72	9	6	6	5	1	682	74.4	4.93	6.9	6
	Confidence	Sequence	Modifications	Qvality PEP	Qvality q-value	# Protein Groups	# Proteins	# PSMs	Master Protein Accessions	# Missed Cleavages	Theo. MH+ [Da]	Confidence (by Search Engine): Sequest HT	Percolator q-Value (by Search Engine): Sequest HT	Percolator PEP (by Search Engine): Sequest HT	XCorr (by Search Engine): Sequest HT
	High	LIGDAAK		0.0441164	0	4	7	1	YJL034W; YBL075C; YLL024C; YDL229W	0	687.404	High	0	0.03021	1.45
	High	LTQEEIDR		0.0237125	0	1	1	1	YJL034W	0	1003.51	High	0	0.01555	1.87
	High	SQIFSTAVDNQPTVMIK	1xOxidation [M15]	0.000306146	0	1	1	1	YJL034W	0	1894.96	High	0	0.0001457	3.3
	High	VLQDSGLEK		0.0763242	0.00384064	1	1	1	YJL034W	0	988.531	High	0.002933	0.05468	1.73
	High	FASEDASIK		0.0965211	0.00757788	1	1	1	YJL034W	0	967.473	High	0.005416	0.0704	1
	High	TEILANEQGNR		0.0989834	0.00757788	1	1	1	YJL034W	0	1244.62	High	0.005416	0.07238	1.4
High	Master Protein	YFL039C	ACT1 SGDID:S000001855, Chr VI from 54377-53260,54696-54687, Genome Release 64-2-1, reverse complement, Verified ORF, "Actin; structural protein involved in cell polarization, endocytosis, and other cytoskeletal functions"	0	10.489	17	5	5	5	1	375	41.7	5.68	11.66	5
	Confidence	Sequence	Modifications	Qvality PEP	Qvality q-value	# Protein Groups	# Proteins	# PSMs	Master Protein Accessions	# Missed Cleavages	Theo. MH+ [Da]	Confidence (by Search Engine): Sequest HT	Percolator q-Value (by Search Engine): Sequest HT	Percolator PEP (by Search Engine): Sequest HT	XCorr (by Search Engine): Sequest HT
	High	VAPEEHPVLLTEAPMNPK	1xOxidation [M15]	0.00153518	0	1	1	1	YFL039C	0	1988.02	High	0	0.0008245	3.11
	High	SYELPDGQVITIGNER		0.000612729	0	1	1	1	YFL039C	0	1790.89	High	0	0.0003074	2.95
	High	IIAPPER		0.057911	0.00120145	1	1	1	YFL039C	0	795.472	High	0.0007987	0.0407	1.61
	High	EITALAPSSMK	1xOxidation [M10]	0.0787979	0.004336	1	1	1	YFL039C	0	1163.6	High	0.003546	0.05663	2.07
	High	DSYVGDEAQSK		0.0773047	0.004336	1	1	1	YFL039C	0	1198.52	High	0.003264	0.05557	1.92
High	Master Protein	YFL037W	TUB2 SGDID:S000001857, Chr VI from 56336-57709, Genome Release 64-2-1, Verified ORF, "Beta-tubulin; associates with alpha-tubulin (Tub1p and Tub3p) to form tubulin dimer, which polymerizes to form microtubules; mutation in human ortholog is associated with congenital fibrosis of the extraocular muscles (CFEOM) with polymicrogyria"	0	10.307	13	5	5	5	1	457	50.9	4.75	11.85	5
	Confidence	Sequence	Modifications	Qvality PEP	Qvality q-value	# Protein Groups	# Proteins	# PSMs	Master Protein Accessions	# Missed Cleavages	Theo. MH+ [Da]	Confidence (by Search Engine): Sequest HT	Percolator q-Value (by Search Engine): Sequest HT	Percolator PEP (by Search Engine): Sequest HT	XCorr (by Search Engine): Sequest HT
	High	SINVDLEPGTIDAVR		0.000320641	0	1	1	1	YFL037W	0	1598.84	High	0	0.0001529	3.37
	High	LAVNLVPFPR		0.00643607	0	1	1	1	YFL037W	0	1125.68	High	0	0.003838	2.5
	High	GHYTEGAELVDSVMDVIR	1xOxidation [M14]	0.039754	0	1	1	1	YFL037W	0	2006.95	High	0	0.02698	2.65
	High	YLTVAAFFR		0.0662946	0.0022289	1	1	1	YFL037W	0	1087.59	High	0.001487	0.04692	1.69
	High	NMMAAADPR	2xOxidation [M2; M3]	0.0911893	0.00669635	1	1	1	YFL037W	0	1008.42	High	0.004826	0.06644	1.64
High	Master Protein	YLR449W	FPR4 SGDID:S000004441, Chr XII from 1030834-1032012, Genome Release 64-2-1, Verified ORF, "Peptidyl-prolyl cis-trans isomerase (PPIase); nuclear proline isomerase; affects expression of multiple genes via its role in nucleosome assembly; catalyzes isomerization of proline residues in histones H3 and H4, which affects lysine methylation of those histones; PPIase domain acts as a transcriptional re…	0	10.272	11	3	3	3	1	392	43.9	4.69	9.88	3
	Confidence	Sequence	Modifications	Qvality PEP	Qvality q-value	# Protein Groups	# Proteins	# PSMs	Master Protein Accessions	# Missed Cleavages	Theo. MH+ [Da]	Confidence (by Search Engine): Sequest HT	Percolator q-Value (by Search Engine): Sequest HT	Percolator PEP (by Search Engine): Sequest HT	XCorr (by Search Engine): Sequest HT
	High	LLEGGIIIEDR		0.000231949	0	1	1	1	YLR449W	0	1227.69	High	0	0.0001082	3.3
	High	ITMAAIDPEPFDDDKKPSTLR	1xOxidation [M3]	3.52735e-05	0	1	1	1	YLR449W	1	2376.18	High	0	1.438e-05	3.78
	High	RIVIPAPYAYGK		0.0495845	0.00120145	1	1	1	YLR449W	1	1347.78	High	0.0007987	0.03432	2.8
High	Master Protein	YGL105W	ARC1 SGDID:S000003073, Chr VII from 307437-308567, Genome Release 64-2-1, Verified ORF, "Protein that binds tRNA and methionyl- and glutamyl-tRNA synthetases; involved in tRNA delivery, stimulating catalysis, and ensuring localization; also binds quadruplex nucleic acids; protein abundance increases in response to DNA replication stress; methionyl-tRNA synthetase is Mes1p; glutamyl-tRNA synthetas…	0	10.257	8	3	3	3	1	376	42.1	7.88	7.92	3
	Confidence	Sequence	Modifications	Qvality PEP	Qvality q-value	# Protein Groups	# Proteins	# PSMs	Master Protein Accessions	# Missed Cleavages	Theo. MH+ [Da]	Confidence (by Search Engine): Sequest HT	Percolator q-Value (by Search Engine): Sequest HT	Percolator PEP (by Search Engine): Sequest HT	XCorr (by Search Engine): Sequest HT
	High	SGQIQPHLDQLNLVLR		3.15253e-05	0	1	1	1	YGL105W	0	1831.02	High	0	1.278e-05	3.22
	High	APAGGAADAAAK		0.00816192	0	1	1	1	YGL105W	0	970.495	High	0	0.004947	1.77
	High	KAPAGGAADAAAK		0.00162924	0	1	1	1	YGL105W	1	1098.59	High	0	0.0008754	2.93
High	Master Protein	YBR195C	MSI1 SGDID:S000000399, Chr II from 611882-610614, Genome Release 64-2-1, reverse complement, Verified ORF, "Subunit of chromatin assembly factor I (CAF-1); chromatin assembly by CAF-1 affects multiple processes including silencing at telomeres, mating type loci, and rDNA; maintenance of kinetochore structure; deactivation of DNA damage checkpoint after DNA repair; chromatin dynamics during transc…	0	10.083	15	4	4	4	1	422	47.3	5.62	4.74	4
	Confidence	Sequence	Modifications	Qvality PEP	Qvality q-value	# Protein Groups	# Proteins	# PSMs	Master Protein Accessions	# Missed Cleavages	Theo. MH+ [Da]	Confidence (by Search Engine): Sequest HT	Percolator q-Value (by Search Engine): Sequest HT	Percolator PEP (by Search Engine): Sequest HT	XCorr (by Search Engine): Sequest HT
	High	ILLSSFTSSQKPEDETIYISK		0.000667693	0	1	1	1	YBR195C	0	2386.24	High	0	0.0003372	2.81
	High	LLYDYLNTNSTK		0.000742155	0	1	1	1	YBR195C	0	1444.73	High	0	0.000376	1.93
	High	ISHPFETK		0.0464698	0	1	1	1	YBR195C	0	958.499	High	0	0.03209	1.48
	High	WSSLNNFDMDEMEFKPENSTR	2xOxidation [M9; M12]	0.030417	0	1	1	1	YBR195C	0	2609.09	High	0	0.02031	1.44
High	Master Protein	YBR068C	BAP2 SGDID:S000000272, Chr II from 375690-373861, Genome Release 64-2-1, reverse complement, Verified ORF, "High-affinity leucine permease; functions as a branched-chain amino acid permease involved in uptake of leucine, isoleucine and valine; contains 12 predicted transmembrane domains; BAP2 has a paralog, BAP3, that arose from the whole genome duplication"	0	9.776	8	4	4	4	1	609	67.7	8.24	8.34	4
	Confidence	Sequence	Modifications	Qvality PEP	Qvality q-value	# Protein Groups	# Proteins	# PSMs	Master Protein Accessions	# Missed Cleavages	Theo. MH+ [Da]	Confidence (by Search Engine): Sequest HT	Percolator q-Value (by Search Engine): Sequest HT	Percolator PEP (by Search Engine): Sequest HT	XCorr (by Search Engine): Sequest HT
	High	SFSAGNNFQSSSSEK		8.11087e-05	0	1	1	1	YBR068C	0	1576.69	High	0	3.5e-05	2.5
	High	LICSLAQQGYAPK	1xCarbamidomethyl [C3]	0.0365235	0	1	1	1	YBR068C	0	1448.76	High	0	0.02463	2.33
	High	SLDELGYK		0.030417	0	1	1	1	YBR068C	0	924.467	High	0	0.02031	1.66
	High	ETSPDSISIR		0.0151657	0	1	1	1	YBR068C	0	1104.55	High	0	0.009574	1.85
High	Master Protein	YMR217W	GUA1 SGDID:S000004830, Chr XIII from 701790-703367, Genome Release 64-2-1, Verified ORF, "GMP synthase; highly conserved enzyme that catalyzes the second step in the biosynthesis of GMP from inosine 5'-phosphate (IMP); transcription is not subject to regulation by guanine but is negatively regulated by nutrient starvation; reduction-of-function mutation gua1-G388D causes changes in cellular guani…	0	9.725	10	5	5	5	1	525	58.4	6.49	11.9	5
	Confidence	Sequence	Modifications	Qvality PEP	Qvality q-value	# Protein Groups	# Proteins	# PSMs	Master Protein Accessions	# Missed Cleavages	Theo. MH+ [Da]	Confidence (by Search Engine): Sequest HT	Percolator q-Value (by Search Engine): Sequest HT	Percolator PEP (by Search Engine): Sequest HT	XCorr (by Search Engine): Sequest HT
	High	IVNEVDGVAR		0.0172988	0	1	1	1	YMR217W	0	1071.58	High	0	0.01103	2.5
	High	THHNVGGLLENMK	1xOxidation [M12]	0.00100578	0	1	1	1	YMR217W	0	1465.72	High	0	0.0005216	2.86
	High	GMNDSTVWMSHGDK	2xOxidation [M2; M9]	0.0172988	0	1	1	1	YMR217W	0	1596.64	High	0	0.01105	2.46
	High	LNEAANVK		0.0549951	0.00120145	1	1	1	YMR217W	0	858.468	High	0.0007987	0.03825	2.14
	High	EQVEIAR		0.105398	0.00835654	1	1	1	YMR217W	0	844.452	High	0.005917	0.07742	1.94
High	Master Protein	IPI00383759 IPI:IPI00383759.1	TREMBL:Q16275;Q9UE12 REFSEQ_NP:NP_002268|ENSEMBL:ENSP00000251645 Tax_Id=9606 Type I hair keratin 1	0	9.692	12	5	9	2	1	416	47.2	4.88	18.04	5
	Confidence	Sequence	Modifications	Qvality PEP	Qvality q-value	# Protein Groups	# Proteins	# PSMs	Master Protein Accessions	# Missed Cleavages	Theo. MH+ [Da]	Confidence (by Search Engine): Sequest HT	Percolator q-Value (by Search Engine): Sequest HT	Percolator PEP (by Search Engine): Sequest HT	XCorr (by Search Engine): Sequest HT
	High	QNQEYQVLLDVR		0.00630988	0	1	11	1	IPI00383759 IPI:IPI00383759.1	0	1504.78	High	0	0.003735	2.86
	High	DSLENTLTESEAR		0.0158807	0	1	5	1	IPI00383759 IPI:IPI00383759.1	0	1464.68	High	0	0.01008	1.74
	High	ETMQFLNDR	1xOxidation [M3]	0.0147715	0	2	12	1	sp; IPI00383759 IPI:IPI00383759.1	0	1169.53	High	0	0.009352	2.3
	High	LAADDFR		0.0346652	0	7	27	5	sp; IPI00384444 IPI:IPI00384444.4; IPI00383759 IPI:IPI00383759.1; sp; sp; IPI00217963 IPI:IPI00217963.2; IPI00450768 IPI:IPI00450768.4	0	807.4	High	0.002933	0.05342	1.97
	High	LASYLEK		0.0365235	0	2	14	1	IPI00383759 IPI:IPI00383759.1; sp	0	823.456	High	0	0.02471	2.05
High	Master Protein	YOR204W	DED1 SGDID:S000005730, Chr XV from 722911-724725, Genome Release 64-2-1, Verified ORF, "ATP-dependent DEAD (Asp-Glu-Ala-Asp)-box RNA helicase; required for translation initiation of all yeast mRNAs; binds to mRNA cap-associated factors, and binding stimulates Ded1p RNA-dependent ATPase activity; mutation in human homolog DBY is associated with male infertility; human homolog DDX3X complements ded…	0	9.639	8	5	5	5	1	604	65.5	7.83	8.49	5
	Confidence	Sequence	Modifications	Qvality PEP	Qvality q-value	# Protein Groups	# Proteins	# PSMs	Master Protein Accessions	# Missed Cleavages	Theo. MH+ [Da]	Confidence (by Search Engine): Sequest HT	Percolator q-Value (by Search Engine): Sequest HT	Percolator PEP (by Search Engine): Sequest HT	XCorr (by Search Engine): Sequest HT
	High	LNDLLER		0.0458702	0	1	2	1	YOR204W	0	872.484	High	0	0.03164	2.01
	High	VGSTSENITQK		0.00223724	0	1	1	1	YOR204W	0	1163.59	High	0	0.001229	2.67
	High	ELATQIFDEAK		0.0446936	0	1	1	1	YOR204W	0	1264.64	High	0	0.03075	1.89
	High	DAMMSAPGSR	2xOxidation [M3; M4]	0.0302186	0	1	1	1	YOR204W	0	1054.43	High	0	0.02019	1.53
	High	DLMACAQTGSGK	1xCarbamidomethyl [C5]; 1xOxidation [M3]	0.0150661	0	1	2	1	YOR204W	0	1254.55	High	0	0.009516	1.92
High	Master Protein	YAL025C	MAK16 SGDID:S000000023, Chr I from 101145-100225, Genome Release 64-2-1, reverse complement, Verified ORF, "Essential nuclear protein; constituent of 66S pre-ribosomal particles; required for maturation of 25S and 5.8S rRNAs; required for maintenance of M1 satellite double-stranded RNA of the L-A virus"	0	9.576	10	3	4	3	1	306	35.7	5.25	9.28	3
	Confidence	Sequence	Modifications	Qvality PEP	Qvality q-value	# Protein Groups	# Proteins	# PSMs	Master Protein Accessions	# Missed Cleavages	Theo. MH+ [Da]	Confidence (by Search Engine): Sequest HT	Percolator q-Value (by Search Engine): Sequest HT	Percolator PEP (by Search Engine): Sequest HT	XCorr (by Search Engine): Sequest HT
	High	SGAYGDKPLNVDEK		4.38691e-05	0	1	1	1	YAL025C	0	1492.73	High	0	1.821e-05	3.27
	High	LTQVMITER		0.0298257	0	1	1	1	YAL025C	0	1090.59	High	0	0.01981	2.17
	High	HYVGVAPK		0.021773	0	1	1	1	YAL025C	0	870.483	High	0	0.01412	1.84
	High	LTQVMITER	1xOxidation [M5]	0.0729852	0.00278092	1	1	1	YAL025C	0	1106.59	High	0.00222	0.05208	2
High	Master Protein	YOR099W	KTR1 SGDID:S000005625, Chr XV from 511825-513006, Genome Release 64-2-1, Verified ORF, "Alpha-1,2-mannosyltransferase; involved in O- and N-linked protein glycosylation; type II membrane protein; member of the KRE2/MNT1 mannosyltransferase family; relocalizes from vacuole to cytoplasm upon DNA replication stress"	0	9.333	13	5	5	5	1	393	46	6.68	8.35	5
	Confidence	Sequence	Modifications	Qvality PEP	Qvality q-value	# Protein Groups	# Proteins	# PSMs	Master Protein Accessions	# Missed Cleavages	Theo. MH+ [Da]	Confidence (by Search Engine): Sequest HT	Percolator q-Value (by Search Engine): Sequest HT	Percolator PEP (by Search Engine): Sequest HT	XCorr (by Search Engine): Sequest HT
	High	IMIPASK	1xOxidation [M2]	0.0214889	0	1	1	1	YOR099W	0	775.438	High	0	0.01396	1.87
	High	YSTVLSSGSGYK		0.0087762	0	1	1	1	YOR099W	0	1248.61	High	0	0.005324	2.56
	High	DLYSLAESIK		0.0213482	0	1	1	1	YOR099W	0	1138.6	High	0	0.01387	1.81
	High	FESGFFYR		0.0263358	0	1	1	1	YOR099W	0	1052.48	High	0	0.01735	2.1
	High	EYEATIPTLWETTR		0.0382296	0	1	1	1	YOR099W	0	1709.84	High	0	0.02595	1.58
High	Master Protein	YNR054C	ESF2 SGDID:S000005337, Chr XIV from 724306-723356, Genome Release 64-2-1, reverse complement, Verified ORF, "Essential nucleolar protein involved in pre-18S rRNA processing; binds to RNA and stimulates ATPase activity of Dbp8; involved in assembly of the small subunit (SSU) processome"	0	9.28	11	3	4	3	1	316	36.4	7.97	9.23	3
	Confidence	Sequence	Modifications	Qvality PEP	Qvality q-value	# Protein Groups	# Proteins	# PSMs	Master Protein Accessions	# Missed Cleavages	Theo. MH+ [Da]	Confidence (by Search Engine): Sequest HT	Percolator q-Value (by Search Engine): Sequest HT	Percolator PEP (by Search Engine): Sequest HT	XCorr (by Search Engine): Sequest HT
	High	WADLTEQIAR		0.00283791	0	1	1	1	YNR054C	0	1202.62	High	0	0.001588	2.7
	High	EVEEQASSTTSLDLK		0.00092911	0	1	1	1	YNR054C	0	1636.79	High	0	0.0004788	2.11
	High	LEMEISQANK	1xOxidation [M3]	0.00130143	0	1	1	2	YNR054C	0	1178.57	High	0	0.0006899	2.3
High	Master Protein	YBR069C	TAT1 SGDID:S000000273, Chr II from 378433-376574, Genome Release 64-2-1, reverse complement, Verified ORF, "Amino acid transporter for valine, leucine, isoleucine, and tyrosine; low-affinity tryptophan and histidine transporter; overexpression confers FK506 and FTY720 resistance; protein abundance increases in response to DNA replication stress"	0	9.226	5	3	3	3	1	619	68.7	7.74	7.68	3
	Confidence	Sequence	Modifications	Qvality PEP	Qvality q-value	# Protein Groups	# Proteins	# PSMs	Master Protein Accessions	# Missed Cleavages	Theo. MH+ [Da]	Confidence (by Search Engine): Sequest HT	Percolator q-Value (by Search Engine): Sequest HT	Percolator PEP (by Search Engine): Sequest HT	XCorr (by Search Engine): Sequest HT
	High	QDEVSGQTAEPR		0.000134025	0	1	1	1	YBR069C	0	1316.61	High	0	6.032e-05	3.2
	High	LLLSLAEQGVLPK		0.000461173	0	1	1	1	YBR069C	0	1380.85	High	0	0.0002266	2.85
	High	DFTITEK		0.0617669	0.0022289	1	1	1	YBR069C	0	853.43	High	0.001487	0.04345	1.63
High	Master Protein	YDR062W	LCB2 SGDID:S000002469, Chr IV from 576474-578159, Genome Release 64-2-1, Verified ORF, "Component of serine palmitoyltransferase; responsible along with Lcb1p for the first committed step in sphingolipid synthesis, which is the condensation of serine with palmitoyl-CoA to form 3-ketosphinganine"	0	9.04	10	5	5	5	1	561	63.1	8.1	6.78	5
	Confidence	Sequence	Modifications	Qvality PEP	Qvality q-value	# Protein Groups	# Proteins	# PSMs	Master Protein Accessions	# Missed Cleavages	Theo. MH+ [Da]	Confidence (by Search Engine): Sequest HT	Percolator q-Value (by Search Engine): Sequest HT	Percolator PEP (by Search Engine): Sequest HT	XCorr (by Search Engine): Sequest HT
	High	EQIVLGQPK		0.0234033	0	1	1	1	YDR062W	0	1011.58	High	0	0.01535	2.26
	High	CLVISDELNHTSIR	1xCarbamidomethyl [C1]	0.00481356	0	1	1	1	YDR062W	0	1656.84	High	0	0.002804	2.17
	High	IDDCFSRPTTGVPGR	1xCarbamidomethyl [C4]	0.0193446	0	1	1	1	YDR062W	0	1677.8	High	0	0.01248	2.35
	High	YSIQSGGPR		0.0489457	0.00120145	1	1	1	YDR062W	0	964.485	High	0.0007987	0.03392	1.58
	High	WDIEEVIR		0.0702348	0.0022289	1	1	1	YDR062W	0	1059.55	High	0.001487	0.05003	1.55
High	Master Protein	YGR119C	NUP57 SGDID:S000003351, Chr VII from 729671-728046, Genome Release 64-2-1, reverse complement, Verified ORF, "FG-nucleoporin component of central core of the nuclear pore complex; contributes directly to nucleocytoplasmic transport and maintenance of the nuclear pore complex (NPC) permeability barrier; found in stable complex with Nic96p and two other FG-nucleoproteins (Nsp1p and Nup49p)"	0	8.935	7	4	4	4	1	541	57.5	9.58	6.22	4
	Confidence	Sequence	Modifications	Qvality PEP	Qvality q-value	# Protein Groups	# Proteins	# PSMs	Master Protein Accessions	# Missed Cleavages	Theo. MH+ [Da]	Confidence (by Search Engine): Sequest HT	Percolator q-Value (by Search Engine): Sequest HT	Percolator PEP (by Search Engine): Sequest HT	XCorr (by Search Engine): Sequest HT
	High	NQVQTENVAQAR		0.00357604	0	1	1	1	YGR119C	0	1357.68	High	0	0.002035	1.75
	High	SEDPAGLGK		0.0126118	0	1	1	1	YGR119C	0	873.431	High	0	0.007882	1.45
	High	LGTQLATLK		0.00299192	0	1	1	1	YGR119C	0	944.578	High	0	0.001678	2.63
	High	HELDTASR		0.0613705	0.0022289	1	1	1	YGR119C	0	928.448	High	0.001487	0.04313	1.84
High	Master Protein	YDR432W	NPL3 SGDID:S000002840, Chr IV from 1328783-1330027, Genome Release 64-2-1, Verified ORF, "RNA-binding protein; promotes elongation, regulates termination, and carries poly(A) mRNA from nucleus to cytoplasm; represses translation initiation by binding eIF4G; required for pre-mRNA splicing; interacts with E3 ubiquitin ligase Bre1p, linking histone ubiquitination to mRNA processing; may have role in…	0	8.862	8	3	3	3	1	414	45.4	5.54	5.85	3
	Confidence	Sequence	Modifications	Qvality PEP	Qvality q-value	# Protein Groups	# Proteins	# PSMs	Master Protein Accessions	# Missed Cleavages	Theo. MH+ [Da]	Confidence (by Search Engine): Sequest HT	Percolator q-Value (by Search Engine): Sequest HT	Percolator PEP (by Search Engine): Sequest HT	XCorr (by Search Engine): Sequest HT
	High	SFANQPLEVVYSK		5.47153e-06	0	1	1	1	YDR432W	0	1481.76	High	0	1.946e-06	3.57
	High	ENSLETTFSSVNTR		0.021773	0	1	1	1	YDR432W	0	1584.75	High	0	0.01419	2.28
	High	GSVITVER		0.0702348	0.0022289	1	1	1	YDR432W	0	860.484	High	0.001487	0.0498	1.22
High	Master Protein	YPL265W	DIP5 SGDID:S000006186, Chr XVI from 41043-42869, Genome Release 64-2-1, Verified ORF, "Dicarboxylic amino acid permease; mediates high-affinity and high-capacity transport of L-glutamate and L-aspartate; also a transporter for Gln, Asn, Ser, Ala, and Gly; relocalizes from plasma membrane to vacuole upon DNA replication stress"	0	8.776	8	5	5	5	1	608	68.1	8.91	8.67	5
	Confidence	Sequence	Modifications	Qvality PEP	Qvality q-value	# Protein Groups	# Proteins	# PSMs	Master Protein Accessions	# Missed Cleavages	Theo. MH+ [Da]	Confidence (by Search Engine): Sequest HT	Percolator q-Value (by Search Engine): Sequest HT	Percolator PEP (by Search Engine): Sequest HT	XCorr (by Search Engine): Sequest HT
	High	QNPDNFPVK		0.030417	0	1	1	1	YPL265W	0	1058.53	High	0	0.02026	2.06
	High	STDVDLYTFK		0.00849146	0	1	1	1	YPL265W	0	1188.58	High	0	0.005171	2
	High	EYSTAITGGK		0.042153	0	1	1	1	YPL265W	0	1026.51	High	0	0.02879	1.4
	High	DDSFAVPDGK		0.0193446	0	1	1	1	YPL265W	0	1050.47	High	0	0.01249	2.05
	High	FAYVAPGQR		0.0629713	0.0022289	1	1	1	YPL265W	0	1008.53	High	0.001487	0.04445	2.56
High	Master Protein	YNL050C	YNL050C SGDID:S000004995, Chr XIV from 534874-534079,534982-534966, Genome Release 64-2-1, reverse complement, Uncharacterized ORF, "Putative protein of unknown function; YNL050c is not an essential gene"	0	8.714	9	3	4	3	1	270	31.4	7.46	8.88	3
	Confidence	Sequence	Modifications	Qvality PEP	Qvality q-value	# Protein Groups	# Proteins	# PSMs	Master Protein Accessions	# Missed Cleavages	Theo. MH+ [Da]	Confidence (by Search Engine): Sequest HT	Percolator q-Value (by Search Engine): Sequest HT	Percolator PEP (by Search Engine): Sequest HT	XCorr (by Search Engine): Sequest HT
	High	ISLKEPEEEIINQERPK		0.00182291	0	1	1	2	YNL050C	1	2052.1	High	0	0.0009907	3.19
	High	EPEEEIINQERPK		0.0021789	0	1	1	1	YNL050C	0	1610.8	High	0	0.001194	2.77
	High	ILEDDLR		0.0872353	0.00522949	1	1	1	YNL050C	0	873.468	High	0.003855	0.06297	1.41
High	Master Protein	YGL064C	MRH4 SGDID:S000003032, Chr VII from 383208-381523, Genome Release 64-2-1, reverse complement, Verified ORF, "Mitochondrial ATP-dependent RNA helicase of the DEAD-box family; required for assembly of the large subunit of mitochondrial ribosomes; binds to the large subunit rRNA, 21S_rRNA; localizes to the matrix face of the mitochondrial inner membrane and associates with the large subunit precurso…	0	8.711	8	4	4	4	1	561	63	9.95	8.3	4
	Confidence	Sequence	Modifications	Qvality PEP	Qvality q-value	# Protein Groups	# Proteins	# PSMs	Master Protein Accessions	# Missed Cleavages	Theo. MH+ [Da]	Confidence (by Search Engine): Sequest HT	Percolator q-Value (by Search Engine): Sequest HT	Percolator PEP (by Search Engine): Sequest HT	XCorr (by Search Engine): Sequest HT
	High	LQIHAIAAETGSGK		0.00357604	0	1	1	1	YGL064C	0	1395.76	High	0	0.002034	2.22
	High	VINSALSPFK		0.00188413	0	1	1	1	YGL064C	0	1075.61	High	0	0.001022	2.3
	High	DVEMNMDSTNK	2xOxidation [M4; M6]	0.0187192	0	1	1	1	YGL064C	0	1315.51	High	0	0.012	1.75
	High	IDILVTTPGK		0.106061	0.00835654	1	1	1	YGL064C	0	1056.63	High	0.005917	0.07807	2.03
High	Master Protein	IPI00431749 IPI:IPI00431749.1	TREMBL:Q6P1A5;Q6KB66 Tax_Id=9606 Keratin b20	0	8.652	10	4	5	3	1	452	50.5	5.67	9.85	4
	Confidence	Sequence	Modifications	Qvality PEP	Qvality q-value	# Protein Groups	# Proteins	# PSMs	Master Protein Accessions	# Missed Cleavages	Theo. MH+ [Da]	Confidence (by Search Engine): Sequest HT	Percolator q-Value (by Search Engine): Sequest HT	Percolator PEP (by Search Engine): Sequest HT	XCorr (by Search Engine): Sequest HT
	High	SAEYGSSLQSSR		0.0212085	0	1	1	1	IPI00431749 IPI:IPI00431749.1	0	1271.59	High	0	0.01375	1.53
	High	VTVNPGLLVPLDVK		0.0245032	0	1	1	1	IPI00431749 IPI:IPI00431749.1	0	1463.88	High	0	0.01603	1.64
	High	LALDLEIATYR		0.000577351	0	3	7	4	IPI00290078 IPI:IPI00290078.2; IPI00431749 IPI:IPI00431749.1; IPI00556624 IPI:IPI00556624.1	0	1277.71	High	0	0.0002873	3.58
	High	APGPGFSSR		0.0505579	0.00120145	1	1	1	IPI00431749 IPI:IPI00431749.1	0	875.437	High	0.0007987	0.03516	2
High	Master Protein	YDL131W	LYS21 SGDID:S000002289, Chr IV from 227393-228715, Genome Release 64-2-1, Verified ORF, "Homocitrate synthase isozyme; catalyzes the condensation of acetyl-CoA and alpha-ketoglutarate to form homocitrate, which is the first step in the lysine biosynthesis pathway; LYS21 has a paralog, LYS20, that arose from the whole genome duplication"	0	8.635	10	4	4	4	1	440	48.6	6.3	6.68	4
	Confidence	Sequence	Modifications	Qvality PEP	Qvality q-value	# Protein Groups	# Proteins	# PSMs	Master Protein Accessions	# Missed Cleavages	Theo. MH+ [Da]	Confidence (by Search Engine): Sequest HT	Percolator q-Value (by Search Engine): Sequest HT	Percolator PEP (by Search Engine): Sequest HT	XCorr (by Search Engine): Sequest HT
	High	SAVEVIEFVK		0.0130342	0	1	2	1	YDL131W	0	1120.62	High	0	0.008147	2.37
	High	LIDVSVLGIGER		0.00975292	0	1	2	1	YDL131W	0	1270.74	High	0	0.005981	1.98
	High	VGIADTVGCANPR	1xCarbamidomethyl [C9]	0.00369611	0	1	2	1	YDL131W	0	1329.66	High	0	0.002111	2.34
	High	FSSEDSFR		0.0335513	0	1	2	1	YDL131W	0	974.421	High	0	0.02254	1.58
High	Master Protein	YKL140W	TGL1 SGDID:S000001623, Chr XI from 180779-182425, Genome Release 64-2-1, Verified ORF, "Steryl ester hydrolase; one of three gene products (Yeh1p, Yeh2p, Tgl1p) responsible for steryl ester hydrolase activity and involved in sterol homeostasis; localized to lipid particle membranes"	0	8.43	9	5	5	5	1	548	62.9	6.83	3.86	5
	Confidence	Sequence	Modifications	Qvality PEP	Qvality q-value	# Protein Groups	# Proteins	# PSMs	Master Protein Accessions	# Missed Cleavages	Theo. MH+ [Da]	Confidence (by Search Engine): Sequest HT	Percolator q-Value (by Search Engine): Sequest HT	Percolator PEP (by Search Engine): Sequest HT	XCorr (by Search Engine): Sequest HT
	High	LYSTTSVK		0.0331157	0	1	1	1	YKL140W	0	898.488	High	0	0.02218	1.48
	High	LSAYLESSK		0.00538534	0	1	1	1	YKL140W	0	997.52	High	0	0.00316	1.85
	High	FIEFFNPGNVSVK		0.0353509	0	1	1	1	YKL140W	0	1497.77	High	0	0.02384	2
	High	TEDNYILTLHR		0.053591	0.00120145	1	1	1	YKL140W	0	1374.7	High	0.0007987	0.03719	1.92
	High	IVDTLAK		0.0829149	0.00476234	1	1	1	YKL140W	0	759.461	High	0.003546	0.0598	1.41
High	Master Protein	YGR191W	HIP1 SGDID:S000003423, Chr VII from 880420-882231, Genome Release 64-2-1, Verified ORF, "High-affinity histidine permease; also involved in the transport of manganese ions"	0	8.368	11	5	5	5	1	603	66	7.4	5.99	5
	Confidence	Sequence	Modifications	Qvality PEP	Qvality q-value	# Protein Groups	# Proteins	# PSMs	Master Protein Accessions	# Missed Cleavages	Theo. MH+ [Da]	Confidence (by Search Engine): Sequest HT	Percolator q-Value (by Search Engine): Sequest HT	Percolator PEP (by Search Engine): Sequest HT	XCorr (by Search Engine): Sequest HT
	High	ESTTFVTELTSK		0.0115764	0	1	1	1	YGR191W	0	1342.67	High	0	0.007211	2.41
	High	DSPGINQTTNDITSSDR		0.0339926	0	1	1	1	YGR191W	0	1820.83	High	0	0.02281	1.89
	High	LEDMDLDTGR	1xOxidation [M4]	0.0154681	0	1	1	1	YGR191W	0	1180.52	High	0	0.009786	1.69
	High	TDSAFPLSSK		0.0693402	0.0022289	1	1	1	YGR191W	0	1052.53	High	0.001487	0.0494	1.38
	High	NEDTEQEDINNTNLSK		0.0753556	0.00384064	1	1	1	YGR191W	0	1863.82	High	0.002933	0.05389	1.09
High	Master Protein	YDR233C	RTN1 SGDID:S000002641, Chr IV from 930357-929470, Genome Release 64-2-1, reverse complement, Verified ORF, "Reticulon protein; stabilizes membrane curvature; involved in nuclear pore assembly and maintenance of tubular ER morphology; mutant overexpressing RTN1 shows increase in tubular ER; interacts with exocyst subunit Sec6p, Yip3p, and Sbh1p; more abundant than Rtn2p; member of the RTNLA subfam…	0	8.141	14	3	3	3	1	295	32.9	8.98	6.75	3
	Confidence	Sequence	Modifications	Qvality PEP	Qvality q-value	# Protein Groups	# Proteins	# PSMs	Master Protein Accessions	# Missed Cleavages	Theo. MH+ [Da]	Confidence (by Search Engine): Sequest HT	Percolator q-Value (by Search Engine): Sequest HT	Percolator PEP (by Search Engine): Sequest HT	XCorr (by Search Engine): Sequest HT
	High	TQEFSQMACEK	1xCarbamidomethyl [C9]; 1xOxidation [M7]	0.0148691	0	1	1	1	YDR233C	0	1374.57	High	0	0.009371	1.93
	High	TAPVSSTAGPQTASTSK		0.00106038	0	1	1	1	YDR233C	0	1590.8	High	0	0.0005527	2.16
	High	LAADVPLEPESK		0.00251975	0	1	1	1	YDR233C	0	1268.67	High	0	0.001396	2.66
High	Master Protein	YBR003W	COQ1 SGDID:S000000207, Chr II from 242809-244230, Genome Release 64-2-1, Verified ORF, "Hexaprenyl pyrophosphate synthetase; catalyzes the first step in ubiquinone (coenzyme Q) biosynthesis"	0	8.032	8	3	3	3	1	473	52.5	8.84	6.65	3
	Confidence	Sequence	Modifications	Qvality PEP	Qvality q-value	# Protein Groups	# Proteins	# PSMs	Master Protein Accessions	# Missed Cleavages	Theo. MH+ [Da]	Confidence (by Search Engine): Sequest HT	Percolator q-Value (by Search Engine): Sequest HT	Percolator PEP (by Search Engine): Sequest HT	XCorr (by Search Engine): Sequest HT
	High	SALEFLTNSILTR		0.024343	0	1	1	1	YBR003W	0	1464.81	High	0	0.01601	1.73
	High	LGIATAPVLFAWK		0.000910874	0	1	1	1	YBR003W	0	1386.81	High	0	0.0004689	2.98
	High	GPEPLPEETFDK		0.00225207	0	1	1	1	YBR003W	0	1358.65	High	0	0.001237	1.94
High	Master Protein	YMR243C	ZRC1 SGDID:S000004856, Chr XIII from 756166-754838, Genome Release 64-2-1, reverse complement, Verified ORF, "Vacuolar membrane zinc transporter; transports zinc from cytosol to vacuole for storage; also has role in resistance to zinc shock resulting from sudden influx of zinc into cytoplasm; human ortholog SLC30A10 functions as a Mn transporter and mutations in SLC30A10 cause neurotoxic accumula…	0	8.026	12	3	3	3	1	442	48.3	6.35	8.24	3
	Confidence	Sequence	Modifications	Qvality PEP	Qvality q-value	# Protein Groups	# Proteins	# PSMs	Master Protein Accessions	# Missed Cleavages	Theo. MH+ [Da]	Confidence (by Search Engine): Sequest HT	Percolator q-Value (by Search Engine): Sequest HT	Percolator PEP (by Search Engine): Sequest HT	XCorr (by Search Engine): Sequest HT
	High	ILLQATPSTISADQIQR		0.0449849	0	1	1	1	YMR243C	0	1855.03	High	0	0.03093	2.23
	High	LIEPQEIQNPR		0.000505874	0	1	1	1	YMR243C	0	1336.72	High	0	0.0002504	2.92
	High	FSIIAGGSPSSSQEAFDSHGNTEHGR		0.00220788	0	1	1	1	YMR243C	0	2675.21	High	0	0.001215	3.09
High	Master Protein	YMR015C	ERG5 SGDID:S000004617, Chr XIII from 302485-300869, Genome Release 64-2-1, reverse complement, Verified ORF, "C-22 sterol desaturase; a cytochrome P450 enzyme that catalyzes the formation of the C-22(23) double bond in the sterol side chain in ergosterol biosynthesis; may be a target of azole antifungal drugs"	0	8.006	8	4	5	4	1	538	61.3	7.91	7.09	4
	Confidence	Sequence	Modifications	Qvality PEP	Qvality q-value	# Protein Groups	# Proteins	# PSMs	Master Protein Accessions	# Missed Cleavages	Theo. MH+ [Da]	Confidence (by Search Engine): Sequest HT	Percolator q-Value (by Search Engine): Sequest HT	Percolator PEP (by Search Engine): Sequest HT	XCorr (by Search Engine): Sequest HT
	High	YRPPVLMVPYVVK	1xOxidation [M7]	0.00514211	0	1	1	1	YMR015C	0	1576.89	High	0	0.003007	3.1
	High	IFENCAQMAK	1xCarbamidomethyl [C5]	0.039754	0	1	1	1	YMR015C	0	1211.55	High	0	0.02699	1.36
	High	IFENCAQMAK	1xCarbamidomethyl [C5]; 1xOxidation [M8]	0.0432642	0	1	1	1	YMR015C	0	1227.55	High	0	0.02955	1.33
	High	KNFPVSPNYTAPK		0.0793017	0.00476234	1	1	1	YMR015C	1	1462.77	High	0.003546	0.05676	2.29
	High	DDLLLTFK		0.0989834	0.00757788	1	1	1	YMR015C	0	964.535	High	0.005416	0.07245	1.7
High	Master Protein	YJL081C	ARP4 SGDID:S000003617, Chr X from 285271-283802, Genome Release 64-2-1, reverse complement, Verified ORF, "Nuclear actin-related protein involved in chromatin remodeling; component of chromatin-remodeling enzyme complexes"	0	7.911	10	4	4	4	1	489	54.8	5.45	6.87	4
	Confidence	Sequence	Modifications	Qvality PEP	Qvality q-value	# Protein Groups	# Proteins	# PSMs	Master Protein Accessions	# Missed Cleavages	Theo. MH+ [Da]	Confidence (by Search Engine): Sequest HT	Percolator q-Value (by Search Engine): Sequest HT	Percolator PEP (by Search Engine): Sequest HT	XCorr (by Search Engine): Sequest HT
	High	VTPTEEKEQEAVSK		0.0184746	0	1	1	1	YJL081C	1	1574.79	High	0	0.01186	2.32
	High	STSPAANSADTPNETGK		0.0168495	0	1	1	1	YJL081C	0	1647.75	High	0	0.01077	1.16
	High	TFDYEVDK		0.03605	0	1	1	1	YJL081C	0	1016.46	High	0	0.02441	1.83
	High	IFSEQSIGIPR		0.00660825	0	1	1	1	YJL081C	0	1246.68	High	0	0.003935	2.72
High	Master Protein	YDR483W	KRE2 SGDID:S000002891, Chr IV from 1421157-1422485, Genome Release 64-2-1, Verified ORF, "Alpha1,2-mannosyltransferase of the Golgi; involved in protein mannosylation; KRE2 has a paralog, KTR6, that arose from the whole genome duplication"	0	7.846	8	2	2	2	1	442	51.4	5.4	7.93	2
	Confidence	Sequence	Modifications	Qvality PEP	Qvality q-value	# Protein Groups	# Proteins	# PSMs	Master Protein Accessions	# Missed Cleavages	Theo. MH+ [Da]	Confidence (by Search Engine): Sequest HT	Percolator q-Value (by Search Engine): Sequest HT	Percolator PEP (by Search Engine): Sequest HT	XCorr (by Search Engine): Sequest HT
	High	TTMDYITPSFANK	1xOxidation [M3]	0.0176435	0	1	1	1	YDR483W	0	1504.7	High	0	0.01129	1.74
	High	KLEQSALNSEASEDSEAMDEESK	1xOxidation [M18]	3.65627e-06	0	1	1	1	YDR483W	1	2543.09	High	0	1.263e-06	6.2
High	Master Protein	YDR388W	RVS167 SGDID:S000002796, Chr IV from 1250186-1251634, Genome Release 64-2-1, Verified ORF, "Actin-associated protein with roles in endocytosis and exocytosis; interacts with Rvs161p to regulate actin cytoskeleton, endocytosis, and viability following starvation or osmotic stress; recruited to bud tips by Gyl1p and Gyp5p during polarized growth; homolog of mammalian amphiphysin"	0	7.82	9	3	3	3	1	482	52.7	6.01	5.73	3
	Confidence	Sequence	Modifications	Qvality PEP	Qvality q-value	# Protein Groups	# Proteins	# PSMs	Master Protein Accessions	# Missed Cleavages	Theo. MH+ [Da]	Confidence (by Search Engine): Sequest HT	Percolator q-Value (by Search Engine): Sequest HT	Percolator PEP (by Search Engine): Sequest HT	XCorr (by Search Engine): Sequest HT
	High	MGEQTEDPVYEDAER	1xOxidation [M1]	0.0100798	0	1	1	1	YDR388W	0	1784.73	High	0	0.006192	2
	High	SMEEIFKPISGK	1xOxidation [M2]	0.0100136	0	1	1	1	YDR388W	0	1381.7	High	0	0.006172	1.95
	High	KGNVEEQTDALTITHFK		0.00077729	0	1	1	1	YDR388W	1	1930.99	High	0	0.0003961	3.73
High	Master Protein	YER073W	ALD5 SGDID:S000000875, Chr V from 304030-305592, Genome Release 64-2-1, Verified ORF, "Mitochondrial aldehyde dehydrogenase; involved in regulation or biosynthesis of electron transport chain components and acetate formation; activated by K+; utilizes NADP+ as the preferred coenzyme; constitutively expressed"	0	7.762	8	4	4	4	1	520	56.7	8.15	8.2	4
	Confidence	Sequence	Modifications	Qvality PEP	Qvality q-value	# Protein Groups	# Proteins	# PSMs	Master Protein Accessions	# Missed Cleavages	Theo. MH+ [Da]	Confidence (by Search Engine): Sequest HT	Percolator q-Value (by Search Engine): Sequest HT	Percolator PEP (by Search Engine): Sequest HT	XCorr (by Search Engine): Sequest HT
	High	ALFNLADLVEK		0.00968881	0	1	1	1	YER073W	0	1232.69	High	0	0.005918	2.19
	High	AMEDDVDEAVAAAK	1xOxidation [M2]	0.00626837	0	1	1	1	YER073W	0	1450.64	High	0	0.003728	2.45
	High	GDVALVSK		0.0346652	0	1	1	1	YER073W	0	788.451	High	0	0.02333	1.77
	High	WSIVEPEVR		0.0486293	0.000644996	1	1	1	YER073W	0	1114.59	High	0.0007987	0.03359	1.78
High	Master Protein	YDR342C	HXT7 SGDID:S000002750, Chr IV from 1155928-1154216, Genome Release 64-2-1, reverse complement, Verified ORF, "High-affinity glucose transporter; member of the major facilitator superfamily, nearly identical to Hxt6p, expressed at high basal levels relative to other HXTs, expression repressed by high glucose levels; HXT7 has a paralog, HXT4, that arose from the whole genome duplication"	0	7.726	7	3	3	3	1	570	62.7	7.75	7.07	3
	Confidence	Sequence	Modifications	Qvality PEP	Qvality q-value	# Protein Groups	# Proteins	# PSMs	Master Protein Accessions	# Missed Cleavages	Theo. MH+ [Da]	Confidence (by Search Engine): Sequest HT	Percolator q-Value (by Search Engine): Sequest HT	Percolator PEP (by Search Engine): Sequest HT	XCorr (by Search Engine): Sequest HT
	High	AYGEGEEHEPVVEIPK		0.000654587	0	1	2	1	YDR342C	0	1782.85	High	0	0.0003295	3.02
	High	LAGNASWGELFSSK		0.00146579	0	1	2	1	YDR342C	0	1466.73	High	0	0.0007813	2.4
	High	DGTNYLSK		0.0996082	0.00757788	1	2	1	YDR342C	0	897.431	High	0.005416	0.07306	1.65
High	Master Protein	YFL016C	MDJ1 SGDID:S000001878, Chr VI from 106236-104701, Genome Release 64-2-1, reverse complement, Verified ORF, "Co-chaperone that stimulates HSP70 protein Ssc1p ATPase activity; involved in protein folding/refolding in the mitochodrial matrix; required for proteolysis of misfolded proteins; member of the HSP40 (DnaJ) family of chaperones"	0	7.707	16	5	5	5	1	511	55.5	9.22	8.4	5
	Confidence	Sequence	Modifications	Qvality PEP	Qvality q-value	# Protein Groups	# Proteins	# PSMs	Master Protein Accessions	# Missed Cleavages	Theo. MH+ [Da]	Confidence (by Search Engine): Sequest HT	Percolator q-Value (by Search Engine): Sequest HT	Percolator PEP (by Search Engine): Sequest HT	XCorr (by Search Engine): Sequest HT
	High	TITVDLPHGLQDGDVVR		0.0377343	0	1	1	1	YFL016C	0	1834.97	High	0	0.02553	1.55
	High	TMQPGTAAGTAINEEILK	1xOxidation [M2]	0.0104866	0	1	1	1	YFL016C	0	1860.94	High	0	0.00645	2.16
	High	DAVFGSK		0.0483149	0	1	1	1	YFL016C	0	723.367	High	0.0004275	0.03341	1.81
	High	EIPITTAALGGTVTIPTVEGQK		0.0646123	0.0022289	1	1	1	YFL016C	0	2196.21	High	0.001487	0.04564	2.1
	High	VAPGTQYNQVISIPNMGVPK	1xOxidation [M16]	0.106061	0.00835654	1	1	1	YFL016C	0	2129.11	High	0.005917	0.07821	2.34
High	Master Protein	YJL138C	TIF2 SGDID:S000003674, Chr X from 154691-153504, Genome Release 64-2-1, reverse complement, Verified ORF, "Translation initiation factor eIF4A; DEA(D/H)-box RNA helicase that couples ATPase activity to RNA binding and unwinding; forms a dumbbell structure of two compact domains connected by a linker; interacts with eIF4G; protein abundance increases in response to DNA replication stress; TIF2 has…	0	7.632	10	4	4	4	1	395	44.7	5.12	8.25	4
	Confidence	Sequence	Modifications	Qvality PEP	Qvality q-value	# Protein Groups	# Proteins	# PSMs	Master Protein Accessions	# Missed Cleavages	Theo. MH+ [Da]	Confidence (by Search Engine): Sequest HT	Percolator q-Value (by Search Engine): Sequest HT	Percolator PEP (by Search Engine): Sequest HT	XCorr (by Search Engine): Sequest HT
	High	TGTFSIAALQR		0.0140136	0	1	1	1	YJL138C	0	1164.64	High	0	0.008817	1.9
	High	APQALMLAPTR	1xOxidation [M6]	0.0143876	0	1	1	1	YJL138C	0	1184.65	High	0	0.009095	2.21
	High	DAQIVVGTPGR		0.00598531	0	1	1	1	YJL138C	0	1112.61	High	0	0.003547	2.24
	High	ELALQIQK		0.110807	0.0087043	1	1	1	YJL138C	0	942.562	High	0.006158	0.08197	1.9
High	Master Protein	YDR345C	HXT3 SGDID:S000002753, Chr IV from 1164660-1162957, Genome Release 64-2-1, reverse complement, Verified ORF, "Low affinity glucose transporter of the major facilitator superfamily; expression is induced in low or high glucose conditions; HXT3 has a paralog, HXT5, that arose from the whole genome duplication"	0	7.546	8	4	4	4	1	567	62.5	7.08	9.35	4
	Confidence	Sequence	Modifications	Qvality PEP	Qvality q-value	# Protein Groups	# Proteins	# PSMs	Master Protein Accessions	# Missed Cleavages	Theo. MH+ [Da]	Confidence (by Search Engine): Sequest HT	Percolator q-Value (by Search Engine): Sequest HT	Percolator PEP (by Search Engine): Sequest HT	XCorr (by Search Engine): Sequest HT
	High	SASWVPTSQR		0.027213	0	1	1	1	YDR345C	0	1118.56	High	0	0.01804	2.24
	High	YLVEAGQIDEAR		0.0254866	0	1	1	1	YDR345C	0	1363.69	High	0	0.01675	1.92
	High	GANYDADALMHDDQPFYK		0.00724791	0	1	1	1	YDR345C	0	2070.89	High	0	0.004337	3.49
	High	DGSYYLSK		0.0324727	0	1	1	1	YDR345C	0	932.436	High	0	0.0217	1.71
High	Master Protein	YOR320C	GNT1 SGDID:S000005847, Chr XV from 915094-913619, Genome Release 64-2-1, reverse complement, Verified ORF, "N-acetylglucosaminyltransferase; capable of modification of N-linked glycans in the Golgi apparatus"	0	7.402	9	4	4	4	1	491	57.5	8.37	8.76	4
	Confidence	Sequence	Modifications	Qvality PEP	Qvality q-value	# Protein Groups	# Proteins	# PSMs	Master Protein Accessions	# Missed Cleavages	Theo. MH+ [Da]	Confidence (by Search Engine): Sequest HT	Percolator q-Value (by Search Engine): Sequest HT	Percolator PEP (by Search Engine): Sequest HT	XCorr (by Search Engine): Sequest HT
	High	ETIDDLYTAR		0.00538534	0	1	1	1	YOR320C	0	1196.58	High	0	0.003154	2.47
	High	FASNLMVINPSK	1xOxidation [M6]	0.00410806	0	1	1	1	YOR320C	0	1336.69	High	0	0.00236	2.38
	High	YGLLTGSLR		0.0989834	0.00757788	1	1	1	YOR320C	0	979.557	High	0.005416	0.0723	2.01
	High	VIYLDNDAILR		0.100237	0.00757788	1	1	1	YOR320C	0	1304.72	High	0.005741	0.07359	1.9
High	Master Protein	YNL219C	ALG9 SGDID:S000005163, Chr XIV from 237663-235996, Genome Release 64-2-1, reverse complement, Verified ORF, "Mannosyltransferase, involved in N-linked glycosylation; catalyzes both the transfer of seventh mannose residue on B-arm and ninth mannose residue on the C-arm from Dol-P-Man to lipid-linked oligosaccharides; mutation of the human ortholog causes type 1 congenital disorders of glycosylatio…	0	7.376	6	3	3	3	1	555	63.7	8.62	7.11	3
	Confidence	Sequence	Modifications	Qvality PEP	Qvality q-value	# Protein Groups	# Proteins	# PSMs	Master Protein Accessions	# Missed Cleavages	Theo. MH+ [Da]	Confidence (by Search Engine): Sequest HT	Percolator q-Value (by Search Engine): Sequest HT	Percolator PEP (by Search Engine): Sequest HT	XCorr (by Search Engine): Sequest HT
	High	APVVNVCTGR	1xCarbamidomethyl [C7]	0.0197298	0	1	1	1	YNL219C	0	1072.56	High	0	0.01274	2.23
	High	LACAAFIDGENSK	1xCarbamidomethyl [C3]	0.000187739	0	1	1	1	YNL219C	0	1395.66	High	0	8.634e-05	2.87
	High	AFYVPEPINR		0.0549951	0.00120145	1	1	1	YNL219C	0	1205.63	High	0.0007987	0.03828	2.01
High	Master Protein	YDL150W	RPC53 SGDID:S000002309, Chr IV from 183343-184611, Genome Release 64-2-1, Verified ORF, "RNA polymerase III subunit C53"	0	7.249	8	3	3	3	1	422	46.6	8.63	5.74	3
	Confidence	Sequence	Modifications	Qvality PEP	Qvality q-value	# Protein Groups	# Proteins	# PSMs	Master Protein Accessions	# Missed Cleavages	Theo. MH+ [Da]	Confidence (by Search Engine): Sequest HT	Percolator q-Value (by Search Engine): Sequest HT	Percolator PEP (by Search Engine): Sequest HT	XCorr (by Search Engine): Sequest HT
	High	SEGSGSSLVQK		0.0169608	0	1	1	1	YDL150W	0	1078.54	High	0	0.0108	1.71
	High	TEPVGTGLQSYLEER		0.00309239	0	1	1	1	YDL150W	0	1678.83	High	0	0.001748	1.9
	High	FMVFQLPTR	1xOxidation [M2]	0.00510827	0	1	1	1	YDL150W	0	1154.6	High	0	0.002985	2.13
High	Master Protein	YOR340C	RPA43 SGDID:S000005867, Chr XV from 960182-959202, Genome Release 64-2-1, reverse complement, Verified ORF, "RNA polymerase I subunit A43"	0	7.201	13	4	4	4	1	326	36.2	4.92	8.4	4
	Confidence	Sequence	Modifications	Qvality PEP	Qvality q-value	# Protein Groups	# Proteins	# PSMs	Master Protein Accessions	# Missed Cleavages	Theo. MH+ [Da]	Confidence (by Search Engine): Sequest HT	Percolator q-Value (by Search Engine): Sequest HT	Percolator PEP (by Search Engine): Sequest HT	XCorr (by Search Engine): Sequest HT
	High	ILDADPLSK		0.00669606	0	1	1	1	YOR340C	0	971.541	High	0	0.003991	1.73
	High	VGGVVLGYEGLK		0.00465723	0	1	1	1	YOR340C	0	1190.68	High	0	0.0027	2.66
	High	SQAESLPIVSNK		0.105398	0.00835654	1	1	1	YOR340C	0	1272.68	High	0.005917	0.07736	1.71
	High	ELDLPEVK		0.102787	0.00835654	1	1	1	YOR340C	0	942.514	High	0.005917	0.07556	2.3
High	Master Protein	YBL005W-B	YBL005W-B SGDID:S000002147, Chr II from 221330-222634,222636-226598, Genome Release 64-2-1, transposable_element_gene, "Retrotransposon TYA Gag and TYB Pol genes; transcribed/translated as one unit; polyprotein is processed to make a nucleocapsid-like protein (Gag), reverse transcriptase (RT), protease (PR), and integrase (IN); similar to retroviral genes"	0	7.05	2	2	3	1	1	1755	198.8	8.19	6.61	2
	Confidence	Sequence	Modifications	Qvality PEP	Qvality q-value	# Protein Groups	# Proteins	# PSMs	Master Protein Accessions	# Missed Cleavages	Theo. MH+ [Da]	Confidence (by Search Engine): Sequest HT	Percolator q-Value (by Search Engine): Sequest HT	Percolator PEP (by Search Engine): Sequest HT	XCorr (by Search Engine): Sequest HT
	High	EVQTTQDPLDISASK		0.0076408	0	1	5	1	YBL005W-B	0	1631.81	High	0	0.00459	2.3
	High	DILSVDYTDIMK	1xOxidation [M11]	0.00228203	0	2	49	1	YHR214C-B; YBL005W-B	0	1428.69	High	0	0.001263	2.37
	High	DILSVDYTDIMK		0.0235574	0	2	49	1	YHR214C-B; YBL005W-B	0	1412.7	High	0	0.01539	1.94
High	Master Protein	YGL202W	ARO8 SGDID:S000003170, Chr VII from 116059-117561, Genome Release 64-2-1, Verified ORF, "Aromatic aminotransferase I; expression is regulated by general control of amino acid biosynthesis"	0	7.037	11	4	4	4	1	500	56.1	6.01	6.87	4
	Confidence	Sequence	Modifications	Qvality PEP	Qvality q-value	# Protein Groups	# Proteins	# PSMs	Master Protein Accessions	# Missed Cleavages	Theo. MH+ [Da]	Confidence (by Search Engine): Sequest HT	Percolator q-Value (by Search Engine): Sequest HT	Percolator PEP (by Search Engine): Sequest HT	XCorr (by Search Engine): Sequest HT
	High	SLANTFLSLDTEGR		0.0154681	0	1	1	1	YGL202W	0	1523.77	High	0	0.00978	2.4
	High	EVSNPNIIFFR		0.0193446	0	1	1	1	YGL202W	0	1335.71	High	0	0.01246	2.22
	High	GTYAAVSPEK		0.0154681	0	1	1	1	YGL202W	0	1022.52	High	0	0.009831	2.25
	High	LLYTIPTGQNPTGTSIADHR		0.10474	0.00835654	1	1	1	YGL202W	0	2155.11	High	0.005917	0.0767	1.93
High	Master Protein	YFL048C	EMP47 SGDID:S000001846, Chr VI from 40180-38843, Genome Release 64-2-1, reverse complement, Verified ORF, "Integral membrane component of ER-derived COPII-coated vesicles; functionS in ER to Golgi transport; EMP47 has a paralog, EMP46, that arose from the whole genome duplication"	0	6.921	10	4	4	4	1	445	50.3	5.97	8.2	4
	Confidence	Sequence	Modifications	Qvality PEP	Qvality q-value	# Protein Groups	# Proteins	# PSMs	Master Protein Accessions	# Missed Cleavages	Theo. MH+ [Da]	Confidence (by Search Engine): Sequest HT	Percolator q-Value (by Search Engine): Sequest HT	Percolator PEP (by Search Engine): Sequest HT	XCorr (by Search Engine): Sequest HT
	High	QLSSKPPANNEK		0.0358154	0	1	1	1	YFL048C	0	1312.69	High	0	0.02426	2.21
	High	LSSDYSLPDLINAR		0.0156731	0	1	1	1	YFL048C	0	1563.8	High	0	0.009954	2.47
	High	GQLNDGQKPVDK		0.0163043	0	1	1	1	YFL048C	0	1298.67	High	0	0.01037	1.84
	High	VLVEQEK		0.0675838	0.0022289	1	1	1	YFL048C	0	844.477	High	0.001487	0.04788	1.69
High	Master Protein	YDR182W	CDC1 SGDID:S000002590, Chr IV from 827582-829057, Genome Release 64-2-1, Verified ORF, "Putative lipid phosphatase of the endoplasmic reticulum; shows Mn2+ dependence and may affect Ca2+ signaling; mutants display actin and general growth defects and pleiotropic defects in cell cycle progression and organelle distribution"	0	6.865	14	4	4	4	1	491	57.1	9.44	7.88	4
	Confidence	Sequence	Modifications	Qvality PEP	Qvality q-value	# Protein Groups	# Proteins	# PSMs	Master Protein Accessions	# Missed Cleavages	Theo. MH+ [Da]	Confidence (by Search Engine): Sequest HT	Percolator q-Value (by Search Engine): Sequest HT	Percolator PEP (by Search Engine): Sequest HT	XCorr (by Search Engine): Sequest HT
	High	QFLDNFAMGSHPLPR	1xOxidation [M8]	0.00299192	0	1	1	1	YDR182W	0	1745.84	High	0	0.001688	3.27
	High	DPEQQTCGQLR	1xCarbamidomethyl [C7]	0.0266833	0	1	1	1	YDR182W	0	1331.6	High	0	0.01762	1.64
	High	VFTRPDGNTSDLPLPTSISK		0.0861357	0.00522949	1	1	1	YDR182W	0	2145.12	High	0.003855	0.06242	2.97
	High	TVMSLPGNHDIGFGDTVVESSLQR	1xOxidation [M3]	0.100237	0.00757788	1	1	1	YDR182W	0	2575.25	High	0.005741	0.07347	1.61
High	Master Protein	sp	CASK_BOVIN	0	6.779	21	3	4	3	1	190	21.3	6.77	7.18	3
	Confidence	Sequence	Modifications	Qvality PEP	Qvality q-value	# Protein Groups	# Proteins	# PSMs	Master Protein Accessions	# Missed Cleavages	Theo. MH+ [Da]	Confidence (by Search Engine): Sequest HT	Percolator q-Value (by Search Engine): Sequest HT	Percolator PEP (by Search Engine): Sequest HT	XCorr (by Search Engine): Sequest HT
	High	SCQAQPTTMAR	1xCarbamidomethyl [C2]; 1xOxidation [M9]	0.0169608	0	1	1	1	sp	0	1266.56	High	0	0.01085	2.43
	High	SPAQILQWQVLSNTVPAK		0.0141062	0	1	1	2	sp	0	1980.09	High	0	0.008903	2.99
	High	YIPIQYVLSR		0.0693402	0.0022289	1	1	1	sp	0	1251.71	High	0.001487	0.04925	1.76
High	Master Protein	YHR094C	HXT1 SGDID:S000001136, Chr VIII from 292625-290913, Genome Release 64-2-1, reverse complement, Verified ORF, "Low-affinity glucose transporter of the major facilitator superfamily; expression is induced by Hxk2p in the presence of glucose and repressed by Rgt1p when glucose is limiting; HXT1 has a paralog, HXT6, what arose from the whole genome duplication"	0	6.773	3	1	1	1	1	570	63.2	7.42	3.92	1
	Confidence	Sequence	Modifications	Qvality PEP	Qvality q-value	# Protein Groups	# Proteins	# PSMs	Master Protein Accessions	# Missed Cleavages	Theo. MH+ [Da]	Confidence (by Search Engine): Sequest HT	Percolator q-Value (by Search Engine): Sequest HT	Percolator PEP (by Search Engine): Sequest HT	XCorr (by Search Engine): Sequest HT
	High	GADYNADDLMHDDQPFYK	1xOxidation [M10]	5.59704e-07	0	1	1	1	YHR094C	0	2130.87	High	0	1.688e-07	3.92
High	Master Protein	YLR276C	DBP9 SGDID:S000004266, Chr XII from 696830-695046, Genome Release 64-2-1, reverse complement, Verified ORF, "DEAD-box protein required for 27S rRNA processing; exhibits DNA, RNA and DNA/RNA helicase activities; ATPase activity shows preference for DNA over RNA; DNA helicase activity abolished by mutation in RNA-binding domain"	0	6.694	5	3	3	3	1	594	68	9.19	6.79	3
	Confidence	Sequence	Modifications	Qvality PEP	Qvality q-value	# Protein Groups	# Proteins	# PSMs	Master Protein Accessions	# Missed Cleavages	Theo. MH+ [Da]	Confidence (by Search Engine): Sequest HT	Percolator q-Value (by Search Engine): Sequest HT	Percolator PEP (by Search Engine): Sequest HT	XCorr (by Search Engine): Sequest HT
	High	TGTAISFVVPLK		0.0245032	0	1	1	1	YLR276C	0	1232.72	High	0	0.01611	1.82
	High	ELAQQVYNVLEK		0.00705909	0	1	1	1	YLR276C	0	1433.76	High	0	0.00423	2.64
	High	FNDEEINK		0.00507466	0	1	1	1	YLR276C	0	1008.46	High	0	0.00297	2.33
High	Master Protein	sp	CASB_BOVIN	0	6.429	12	2	2	2	1	224	25.1	5.35	4.01	2
	Confidence	Sequence	Modifications	Qvality PEP	Qvality q-value	# Protein Groups	# Proteins	# PSMs	Master Protein Accessions	# Missed Cleavages	Theo. MH+ [Da]	Confidence (by Search Engine): Sequest HT	Percolator q-Value (by Search Engine): Sequest HT	Percolator PEP (by Search Engine): Sequest HT	XCorr (by Search Engine): Sequest HT
	High	DMPIQAFLLYQEPVLGPVR	1xOxidation [M2]	1.3004e-05	0	1	1	1	sp	0	2202.16	High	0	4.941e-06	4.01
	High	AVPYPQR		0.102787	0.00835654	1	1	1	sp	0	830.452	High	0.005917	0.07538	1.28
High	Master Protein	YKL035W	UGP1 SGDID:S000001518, Chr XI from 369891-371390, Genome Release 64-2-1, Verified ORF, "UDP-glucose pyrophosphorylase (UGPase); catalyses the reversible formation of UDP-Glc from glucose 1-phosphate and UTP, involved in a wide variety of metabolic pathways, expression modulated by Pho85p through Pho4p; UGP1 has a paralog, YHL012W, that arose from the whole genome duplication"	0	6.429	6	3	3	3	1	499	56	7.44	7.53	3
	Confidence	Sequence	Modifications	Qvality PEP	Qvality q-value	# Protein Groups	# Proteins	# PSMs	Master Protein Accessions	# Missed Cleavages	Theo. MH+ [Da]	Confidence (by Search Engine): Sequest HT	Percolator q-Value (by Search Engine): Sequest HT	Percolator PEP (by Search Engine): Sequest HT	XCorr (by Search Engine): Sequest HT
	High	SPNPDEVVK		0.002267	0	1	1	1	YKL035W	0	984.5	High	0	0.001251	2.67
	High	EGNTFLDLSVR		0.0432642	0	1	1	1	YKL035W	0	1250.64	High	0	0.02956	2
	High	GGTLISYDGQVR		0.0158807	0	1	1	1	YKL035W	0	1265.65	High	0	0.01008	2.86
High	Master Protein	YBR288C	APM3 SGDID:S000000492, Chr II from 779463-778012, Genome Release 64-2-1, reverse complement, Verified ORF, "Mu3-like subunit of the clathrin associated protein complex (AP-3); functions in transport of alkaline phosphatase to the vacuole via the alternate pathway"	0	6.345	10	4	4	4	1	483	54.8	6.55	5.81	4
	Confidence	Sequence	Modifications	Qvality PEP	Qvality q-value	# Protein Groups	# Proteins	# PSMs	Master Protein Accessions	# Missed Cleavages	Theo. MH+ [Da]	Confidence (by Search Engine): Sequest HT	Percolator q-Value (by Search Engine): Sequest HT	Percolator PEP (by Search Engine): Sequest HT	XCorr (by Search Engine): Sequest HT
	High	QQQLQQNQISR		0.0115764	0	1	1	1	YBR288C	0	1370.71	High	0	0.007207	1.84
	High	VSQVDDLK		0.0224996	0	1	1	1	YBR288C	0	903.478	High	0	0.01468	1.98
	High	SYLNDNPLVAVK		0.0739247	0.00332055	1	1	1	YBR288C	0	1332.72	High	0.002587	0.05283	1.99
	High	GSNSLIENEEIVPWR		0.109431	0.0087043	1	1	1	YBR288C	0	1742.87	High	0.006158	0.08079	1.34
High	Master Protein	sp	K1H6_HUMAN	0	6.332	7	4	8	2	1	467	52.2	4.94	15.39	4
	Confidence	Sequence	Modifications	Qvality PEP	Qvality q-value	# Protein Groups	# Proteins	# PSMs	Master Protein Accessions	# Missed Cleavages	Theo. MH+ [Da]	Confidence (by Search Engine): Sequest HT	Percolator q-Value (by Search Engine): Sequest HT	Percolator PEP (by Search Engine): Sequest HT	XCorr (by Search Engine): Sequest HT
	High	ETMQFLNDR	1xOxidation [M3]	0.0147715	0	2	12	1	sp; IPI00383759 IPI:IPI00383759.1	0	1169.53	High	0	0.009352	2.3
	High	LAADDFR		0.0346652	0	7	27	5	sp; IPI00384444 IPI:IPI00384444.4; IPI00383759 IPI:IPI00383759.1; sp; sp; IPI00217963 IPI:IPI00217963.2; IPI00450768 IPI:IPI00450768.4	0	807.4	High	0.002933	0.05342	1.97
	High	ENAELESR		0.0658701	0.0022289	1	2	1	sp	0	947.443	High	0.001487	0.04665	1.68
	High	HLLEGEDCK	1xCarbamidomethyl [C8]	0.0646123	0.0022289	1	1	1	sp	0	1100.5	High	0.001487	0.0457	2.32
High	Master Protein	R0020C	REP1 SGDID:S000029675, 2-micron plasmid from 3008-1887, Genome Release 64-2-1, reverse complement, Verified ORF, "Master regulator that regulates transcript levels of the FLP1 gene; acts in concert with Rep2p to regulate transcript levels of the FLP1 gene that promotes plasmid copy amplification and 2-micron plasmid-inheritance; also autoregulates levels of its own transcript; both Rep1p and Rep2…	0	6.185	11	4	4	4	1	373	43.2	6.42	6.72	4
	Confidence	Sequence	Modifications	Qvality PEP	Qvality q-value	# Protein Groups	# Proteins	# PSMs	Master Protein Accessions	# Missed Cleavages	Theo. MH+ [Da]	Confidence (by Search Engine): Sequest HT	Percolator q-Value (by Search Engine): Sequest HT	Percolator PEP (by Search Engine): Sequest HT	XCorr (by Search Engine): Sequest HT
	High	ELIQSQGTVK		0.0387312	0	1	1	1	R0020C	0	1102.61	High	0	0.02623	1.66
	High	ATIGEGLDINVK		0.00854766	0	1	1	1	R0020C	0	1229.67	High	0	0.005187	2.68
	High	YMESPFVNTK	1xOxidation [M2]	0.092935	0.00669635	1	1	1	R0020C	0	1231.57	High	0.004826	0.0678	2.38
	High	VTAFFSYLR		0.0971313	0.00757788	1	1	1	R0020C	0	1103.59	High	0.005416	0.07082	1.42
High	Master Protein	YJL172W	CPS1 SGDID:S000003708, Chr X from 97737-99467, Genome Release 64-2-1, Verified ORF, "Vacuolar carboxypeptidase S; expression is induced under low-nitrogen conditions"	0	6.122	6	3	3	3	1	576	64.6	5.53	4.28	3
	Confidence	Sequence	Modifications	Qvality PEP	Qvality q-value	# Protein Groups	# Proteins	# PSMs	Master Protein Accessions	# Missed Cleavages	Theo. MH+ [Da]	Confidence (by Search Engine): Sequest HT	Percolator q-Value (by Search Engine): Sequest HT	Percolator PEP (by Search Engine): Sequest HT	XCorr (by Search Engine): Sequest HT
	High	HFYELHDYFEK		0.000495944	0	1	1	1	YJL172W	0	1527.69	High	0	0.000245	2.54
	High	IEPLSPSFK		0.0658701	0.0022289	1	1	1	YJL172W	0	1017.56	High	0.001487	0.0466	1.74
	High	LVEYISNQSHLR		0.0911893	0.00669635	1	1	1	YJL172W	0	1458.77	High	0.004826	0.06621	1.42
High	Master Protein	YOR119C	RIO1 SGDID:S000005645, Chr XV from 550246-548792, Genome Release 64-2-1, reverse complement, Verified ORF, "Serine kinase involved in cell cycling and pre-rRNA processing; associated with late pre-40S particles via its conserved C-terminal domain and participates in late 40S biogenesis; association with pre-40S particles regulated by its catalytic ATPase site and likely occurs after the release o…	0	6.069	5	2	2	2	1	484	56.1	6.57	4.94	2
	Confidence	Sequence	Modifications	Qvality PEP	Qvality q-value	# Protein Groups	# Proteins	# PSMs	Master Protein Accessions	# Missed Cleavages	Theo. MH+ [Da]	Confidence (by Search Engine): Sequest HT	Percolator q-Value (by Search Engine): Sequest HT	Percolator PEP (by Search Engine): Sequest HT	XCorr (by Search Engine): Sequest HT
	High	EANVYHAFAGTGK		0.00101245	0	1	1	1	YOR119C	0	1364.66	High	0	0.0005279	2.75
	High	ATVENVLDPR		0.00287566	0	1	1	1	YOR119C	0	1113.59	High	0	0.001616	2.19
High	Master Protein	YJL033W	HCA4 SGDID:S000003570, Chr X from 383837-386149, Genome Release 64-2-1, Verified ORF, "DEAD box RNA helicase; component of the SSU; interacts with Bfr2p and Enp2p; high-copy number suppression of a U14 snoRNA processing mutant suggests an involvement in 18S rRNA synthesis"	0	6.02	6	3	3	3	1	770	87.1	7.42	6.79	3
	Confidence	Sequence	Modifications	Qvality PEP	Qvality q-value	# Protein Groups	# Proteins	# PSMs	Master Protein Accessions	# Missed Cleavages	Theo. MH+ [Da]	Confidence (by Search Engine): Sequest HT	Percolator q-Value (by Search Engine): Sequest HT	Percolator PEP (by Search Engine): Sequest HT	XCorr (by Search Engine): Sequest HT
	High	LTEIQADSIPVSLQGHDVLAAAK		0.0389845	0	1	1	1	YJL033W	0	2376.28	High	0	0.02654	2.19
	High	TLDAIVSTLSPSR		0.00121822	0	1	1	1	YJL033W	0	1359.75	High	0	0.0006405	2.45
	High	INILIGTPGR		0.0782971	0.004336	1	1	1	YJL033W	0	1053.64	High	0.003264	0.05617	2.16
High	Master Protein	YKR016W	MIC60 SGDID:S000001724, Chr XI from 469717-471339, Genome Release 64-2-1, Verified ORF, "Component of the MICOS complex; MICOS (formerly MINOS or MitOS) is a mitochondrial inner membrane complex that extends into the intermembrane space and has a role in the maintenance of crista junctions, inner membrane architecture, and formation of contact sites to the outer membrane; Mic60p is also involved …	0	5.992	4	2	3	2	1	540	61	6.6	7.28	2
	Confidence	Sequence	Modifications	Qvality PEP	Qvality q-value	# Protein Groups	# Proteins	# PSMs	Master Protein Accessions	# Missed Cleavages	Theo. MH+ [Da]	Confidence (by Search Engine): Sequest HT	Percolator q-Value (by Search Engine): Sequest HT	Percolator PEP (by Search Engine): Sequest HT	XCorr (by Search Engine): Sequest HT
	High	ILSNEQIYNR		0.000554908	0	1	1	1	YKR016W	0	1249.65	High	0	0.000276	2.88
	High	EALSNYMIQR	1xOxidation [M7]	0.00622713	0	1	1	2	YKR016W	0	1240.6	High	0	0.006608	2.48
High	Master Protein	YNL330C	RPD3 SGDID:S000005274, Chr XIV from 19302-18001, Genome Release 64-2-1, reverse complement, Verified ORF, "Histone deacetylase, component of both the Rpd3S and Rpd3L complexes; regulates transcription, silencing, autophagy and other processes by influencing chromatin remodeling; forms at least two different complexes which have distinct functions and members; Rpd3(L) recruitment to the subtelomer…	0	5.941	7	2	3	2	1	433	48.9	5.52	4.46	2
	Confidence	Sequence	Modifications	Qvality PEP	Qvality q-value	# Protein Groups	# Proteins	# PSMs	Master Protein Accessions	# Missed Cleavages	Theo. MH+ [Da]	Confidence (by Search Engine): Sequest HT	Percolator q-Value (by Search Engine): Sequest HT	Percolator PEP (by Search Engine): Sequest HT	XCorr (by Search Engine): Sequest HT
	High	VMTNIFANLENTK	1xOxidation [M2]	0.000732411	0	1	1	2	YNL330C	0	1510.76	High	0	0.0003708	2.48
	High	DAEDLGDVEEDSAEAK		0.00527973	0	1	1	1	YNL330C	0	1692.71	High	0	0.003087	1.98
High	Master Protein	YOR341W	RPA190 SGDID:S000005868, Chr XV from 960987-965981, Genome Release 64-2-1, Verified ORF, "RNA polymerase I largest subunit A190"	0	5.873	2	3	3	3	1	1664	186.3	7.08	2.53	3
	Confidence	Sequence	Modifications	Qvality PEP	Qvality q-value	# Protein Groups	# Proteins	# PSMs	Master Protein Accessions	# Missed Cleavages	Theo. MH+ [Da]	Confidence (by Search Engine): Sequest HT	Percolator q-Value (by Search Engine): Sequest HT	Percolator PEP (by Search Engine): Sequest HT	XCorr (by Search Engine): Sequest HT
	High	VIVTETTGTSNTAGGNAAR		0.0235574	0	1	1	1	YOR341W	0	1819.91	High	0	0.01547	1.56
	High	TYGVEAAR		0.0187192	0	1	1	1	YOR341W	0	866.437	High	0	0.01203	1.55
[truncated: 853 more rows]

## Sheet: Processing
================================================================================
Processing Step A: Workflow
================================================================================
Result name: AC101118_110918_CP34_trypsin_digest
Result file: Y:\pipeline\ProteomicsLab\acapaldi\2018\110918\AC101118_110918_PD2_2\AC101118_110918_CP34_trypsin_digest.msf
Description: Basic processing workflow with score threshold validation to be used for searches of low complexity samples or employing a small FASTA database. Specify the FASTA database and any additional modifications.
Workflow based on template: PWF_Fusion_Basic_SequestHT_Percolator
Creation date: 11/13/2018 9:26:34 AM
Created with Discoverer version: 2.2.0.388
------------------------------------------------------------------
The pipeline tree:
------------------------------------------------------------------
|-(6) Spectrum Files
|-(1) Spectrum Selector
|-(2) Sequest HT
|-(4) Percolator
|-(5) ptmRS
------------------------------------------------------------------
Processing node 6: Spectrum Files
------------------------------------------------------------------
Input Data:
#NAME?
------------------------------------------------------------------
Processing node 1: Spectrum Selector
------------------------------------------------------------------
1. General Settings:
#NAME?
- Use New Precursor Reevaluation: True
- Use Isotope Pattern in Precursor Reevaluation: True
2. Spectrum Properties Filter:
- Lower RT Limit: 0
- Upper RT Limit: 0
- First Scan: 0
- Last Scan: 0
- Lowest Charge State: 0
- Highest Charge State: 0
- Min. Precursor Mass: 350 Da
- Max. Precursor Mass: 5000 Da
- Total Intensity Threshold: 0
- Minimum Peak Count: 1
3. Scan Event Filters:
#NAME?
- Min. Collision Energy: 0
- Max. Collision Energy: 1000
#NAME?
4. Peak Filters:
- S/N Threshold (FT-only): 1.5
5. Replacements for Unrecognized Properties:
#NAME?
#NAME?
#NAME?
#NAME?
- Unrecognized Polarity Replacements: +
- Unrecognized MS Resolution@200 Replacements: 60000
- Unrecognized MSn Resolution@200 Replacements: 30000
6. Precursor Pattern Extraction:
- Precursor Clipping Range Before: 2.5 Da
- Precursor Clipping Range After: 5.5 Da
------------------------------------------------------------------
Processing node 2: Sequest HT
------------------------------------------------------------------
1. Input Data:
- Protein Database:
	cRAP_012915_NP.fasta
	SGD_yeast_111814_Contam.fasta
#NAME?
- Max. Missed Cleavage Sites: 2
- Min. Peptide Length: 6
- Max. Peptide Length: 144
- Max. Number of Peptides Reported: 10
2. Tolerances:
- Precursor Mass Tolerance: 10 ppm
- Fragment Mass Tolerance: 0.6 Da
- Use Average Precursor Mass: False
- Use Average Fragment Mass: False
3. Spectrum Matching:
- Use Neutral Loss a Ions: True
- Use Neutral Loss b Ions: True
- Use Neutral Loss y Ions: True
- Use Flanking Ions: True
- Weight of a Ions: 0
- Weight of b Ions: 1
- Weight of c Ions: 0
- Weight of x Ions: 0
- Weight of y Ions: 1
- Weight of z Ions: 0
4. Dynamic Modifications:
- Max. Equal Modifications Per Peptide: 3
- Max. Dynamic Modifications Per Peptide: 4
- 1. Dynamic Modification: Oxidation / +15.995 Da (M)
- 2. Dynamic Modification: Carbamidomethyl / +57.021 Da (C)
- 3. Dynamic Modification: Phospho / +79.966 Da (S, T)
6. Dynamic Modifications (protein terminus):
- 1. N-Terminal Modification: Acetyl / +42.011 Da (N-Terminus)
------------------------------------------------------------------
Processing node 4: Percolator
------------------------------------------------------------------
1. Input Data:
- Maximum Delta Cn: 0.05
- Maximum Rank: 0
2. Decoy Database Search:
- Target FDR (Strict): 0.01
- Target FDR (Relaxed): 0.05
#NAME?
------------------------------------------------------------------
Processing node 5: ptmRS
------------------------------------------------------------------
1. Scoring:
- PhosphoRS Mode: False
- Report Only PTMs: True
- Use Diagnostic Ions: True
- Use Fragment Mass Tolerance of Search Node: True
- Fragment Mass Tolerance: 0.5 Da
#NAME?
- Maximum Peak Depth: 8
- Use a mass accuracy correction: False
2. Performance:
- Maximum Number of Position Isoforms: 500
- Maximum PTMs per peptide: 10
------------------------------------------------------------------
Workflow messages:
------------------------------------------------------------------
2018-11-13 09:26:00	Job Execution:	Processing Y:\pipeline\ProteomicsLab\acapaldi\2018\110918\AC101118_110918_PD2_2\AC101118_110918_CP34_trypsin_digest.msf
2018-11-13 09:26:00	(1):Spectrum Selector:	Reading from file 1 of 1 F2: Y:\pipeline\ProteomicsLab\acapaldi\2018\110918\AC101118_110918_CP34_trypsin_digest.raw (85553 spectra total)
2018-11-13 09:27:00	(2):Sequest HT:	Sequence Database: cRAP_012915_NP.fasta
2018-11-13 09:27:00	(2):Sequest HT:	Sequence Database: SGD_yeast_111814_Contam.fasta
2018-11-13 09:33:00	(1):Spectrum Selector:	There were 435 invalid spectra in the file F2: Y:\pipeline\ProteomicsLab\acapaldi\2018\110918\AC101118_110918_CP34_trypsin_digest.raw.
2018-11-13 09:33:00	(1):Spectrum Selector:	Sent 69188 spectra from file F2.
2018-11-13 09:33:00	(1):Spectrum Selector:	Sent 69188 spectra from 1 files (processing time: 3 min 12 s).
2018-11-13 09:33:00	(1):Spectrum Selector:	-- Total execution of Spectrum Selector (1) took 6 min 10 s --
2018-11-13 09:33:00	(2):Sequest HT:	Storing spectra took 2 min 51 s.
2018-11-13 09:33:00	(2):Sequest HT:	There is already an adequate target FASTA index for cRAP_012915_NP(56ef4fce-6774-47c4-a9db-85224bc07264).fasta.
2018-11-13 09:33:00	(2):Sequest HT:	There is already an adequate target FASTA index for SGD_yeast_111814_Contam(5f9b749f-d9bb-4458-b871-8366a30f5d9c).fasta.
2018-11-13 09:33:00	(2):Sequest HT:	Start Sequest HT target search for 69188 spectra...
2018-11-13 09:33:00	(2):Sequest HT:	ISE (1.1.0.178, x64) started at 11/13/2018 9:33:04 AM on SR-2UA038077T (x64) [8 CPUs] running Microsoft Windows NT 6.1.7601 Service Pack 1 (64bit) [.NET: 4.0.30319.42000]
2018-11-13 09:33:00	(2):Sequest HT:	Workload level: #parallel tasks: 8
2018-11-13 09:33:00	(2):Sequest HT:	Workload level: #spectra loaded and processed at once: 8000
2018-11-13 09:33:00	(2):Sequest HT:	On-Disk search is performed
2018-11-13 09:35:00	(2):Sequest HT:	3497 spectra were not used for search.
2018-11-13 09:35:00	(2):Sequest HT:	Average search time per spectrum was 2.0 ms.
2018-11-13 09:35:00	(2):Sequest HT:	Performing target search containing 69188 spectra took 2 min 16 s.
2018-11-13 09:36:00	(2):Sequest HT:	Stored 61050 PSMs for 65691 spectra
2018-11-13 09:36:00	(2):Sequest HT:	Discarded 159315 peptide(s) that did not match the conditions for protein terminal modifications.
2018-11-13 09:36:00	(2):Sequest HT:	Reading search results took 15.1 s.
2018-11-13 09:36:00	(2):Sequest HT:	Saving results took 20.3 s.
2018-11-13 09:36:00	(2):Sequest HT:	Saving proteins took 11.5 s.
2018-11-13 09:36:00	(2):Sequest HT:	Reading results took 47.9 s.
2018-11-13 09:36:00	(2):Sequest HT:	There is already an adequate decoy FASTA index for cRAP_012915_NP(56ef4fce-6774-47c4-a9db-85224bc07264)_reversed.fasta.
2018-11-13 09:36:00	(2):Sequest HT:	There is already an adequate decoy FASTA index for SGD_yeast_111814_Contam(5f9b749f-d9bb-4458-b871-8366a30f5d9c)_reversed.fasta.
2018-11-13 09:36:00	(2):Sequest HT:	Start Sequest HT decoy search for 69188 spectra...
2018-11-13 09:36:00	(2):Sequest HT:	ISE (1.1.0.178, x64) started at 11/13/2018 9:36:08 AM on SR-2UA038077T (x64) [8 CPUs] running Microsoft Windows NT 6.1.7601 Service Pack 1 (64bit) [.NET: 4.0.30319.42000]
2018-11-13 09:36:00	(2):Sequest HT:	Workload level: #parallel tasks: 8
2018-11-13 09:36:00	(2):Sequest HT:	Workload level: #spectra loaded and processed at once: 8000
2018-11-13 09:36:00	(2):Sequest HT:	On-Disk search is performed
2018-11-13 09:38:00	(2):Sequest HT:	3497 spectra were not used for search.
2018-11-13 09:38:00	(2):Sequest HT:	Average search time per spectrum was 1.8 ms.
2018-11-13 09:38:00	(2):Sequest HT:	Performing decoy search containing 69188 spectra took 1 min 57 s.
2018-11-13 09:38:00	(2):Sequest HT:	Stored 124294 decoy PSMs for 65691 spectra
2018-11-13 09:38:00	(2):Sequest HT:	Discarded 163663 peptide(s) that did not match the conditions for protein terminal modifications.
2018-11-13 09:38:00	(2):Sequest HT:	Reading search results took 14 s.
2018-11-13 09:38:00	(2):Sequest HT:	Saving results took 17.6 s.
2018-11-13 09:38:00	(2):Sequest HT:	Saving proteins took 11.4 s.
2018-11-13 09:38:00	(2):Sequest HT:	Reading results took 43.7 s.
2018-11-13 09:38:00	(2):Sequest HT:	Finalizing search results...
2018-11-13 09:40:00	(2):Sequest HT:	-- Total search time was 5 min 53 s --
2018-11-13 09:44:00	(4):Percolator:	Creating input file for Sequest HT (2) took 4 min 49 s.
2018-11-13 09:44:00	(4):Percolator:	The input file contains 61050 PSMs, 63244 decoy PSMs and 32 features.
2018-11-13 09:44:00	(4):Percolator:	Percolator version 3.00, Build Date Jun 8 2016 22:06:25
2018-11-13 09:44:00	(4):Percolator:	Copyright (c) 2006-9 University of Washington. All rights reserved.
2018-11-13 09:44:00	(4):Percolator:	Written by Lukas K├ñll (lukall@u.washington.edu) in the
2018-11-13 09:44:00	(4):Percolator:	Department of Genome Sciences at the University of Washington.
2018-11-13 09:44:00	(4):Percolator:	Issued command:
2018-11-13 09:44:00	(4):Percolator:	C:\Program Files\Thermo\Proteome Discoverer 2.2\Tools\Percolator\percolator.exe -s -X C:\ProgramData\Thermo\Proteome Discoverer 2.2\Scratch\Job2439\Percol(4)\output.xml -Z -y -k C:\ProgramData\Thermo\Proteome Discoverer 2.2\Scratch\Job2439\Percol(4)\input.xml
2018-11-13 09:44:00	(4):Percolator:	Started Tue Nov 13 09:44:55 2018
2018-11-13 09:44:00	(4):Percolator:	Hyperparameters selectionFdr=0.01, Cpos=0, Cneg=0, maxNiter=10
2018-11-13 09:44:00	(4):Percolator:	Reading input from datafile C:\ProgramData\Thermo\Proteome Discoverer 2.2\Scratch\Job2439\Percol(4)\input.xml
2018-11-13 09:44:00	(4):Percolator:	enzyme=Trypsin
2018-11-13 09:44:00	(4):Percolator:	Features:
2018-11-13 09:44:00	(4):Percolator:	XCorr Delta Cn From Second PSM Binomial Score Delta Mass [Da] Delta Mass [ppm] Absolute Delta Mass [Da] Absolute Delta Mass [ppm] Peptide Length Is z=1 Is z=2 Is z=3 Is z=4 Is z=5 Is z>5 # Missed Cleavages Log Peptides Matched Log Total Intensity Fraction Matched Intensity [%] Fragment Coverage Series A, B, C [%] Fragment Coverage Series X, Y, Z [%] Log Matched Fragment Series Intensities A, B, C…
2018-11-13 09:46:00	(4):Percolator:	Train/test set contains 61050 positives and 63244 negatives, size ratio=0.965309 and pi0=1
2018-11-13 09:46:00	(4):Percolator:	selecting cpos by cross validation
2018-11-13 09:46:00	(4):Percolator:	selecting cneg by cross validation
2018-11-13 09:46:00	(4):Percolator:	Selected feature number 26 as initial search direction, could separate 929 positives in that direction
2018-11-13 09:46:00	(4):Percolator:	Selected feature number 26 as initial search direction, could separate 896 positives in that direction
2018-11-13 09:46:00	(4):Percolator:	Selected feature number 26 as initial search direction, could separate 920 positives in that direction
2018-11-13 09:46:00	(4):Percolator:	Estimating 1379 over q=0.01 in initial direction
2018-11-13 09:46:00	(4):Percolator:	Reading in data and feature calculation took 77.274 cpu seconds or 78 seconds wall time
2018-11-13 09:46:00	(4):Percolator:	#NAME?
2018-11-13 09:46:00	(4):Percolator:	Iteration 1 :	After the iteration step, 2534 target PSMs with q<0.01 were estimated by cross validation
2018-11-13 09:46:00	(4):Percolator:	Iteration 2 :	After the iteration step, 2871 target PSMs with q<0.01 were estimated by cross validation
2018-11-13 09:46:00	(4):Percolator:	Iteration 3 :	After the iteration step, 3007 target PSMs with q<0.01 were estimated by cross validation
2018-11-13 09:46:00	(4):Percolator:	Iteration 4 :	After the iteration step, 3100 target PSMs with q<0.01 were estimated by cross validation
2018-11-13 09:46:00	(4):Percolator:	Iteration 5 :	After the iteration step, 3159 target PSMs with q<0.01 were estimated by cross validation
2018-11-13 09:46:00	(4):Percolator:	Iteration 6 :	After the iteration step, 3183 target PSMs with q<0.01 were estimated by cross validation
2018-11-13 09:46:00	(4):Percolator:	Iteration 7 :	After the iteration step, 3189 target PSMs with q<0.01 were estimated by cross validation
2018-11-13 09:46:00	(4):Percolator:	Iteration 8 :	After the iteration step, 3199 target PSMs with q<0.01 were estimated by cross validation
2018-11-13 09:46:00	(4):Percolator:	Iteration 9 :	After the iteration step, 3200 target PSMs with q<0.01 were estimated by cross validation
2018-11-13 09:46:00	(4):Percolator:	Iteration 10 :	After the iteration step, 3218 target PSMs with q<0.01 were estimated by cross validation
2018-11-13 09:46:00	(4):Percolator:	Obtained weights (only showing weights of first cross validation set)
2018-11-13 09:46:00	(4):Percolator:	# first line contains normalized weights, second line the raw weights
2018-11-13 09:46:00	(4):Percolator:	0.57	0.3531	0.8386	0.0452	-0.7031	-0.304	0.6089	-0.636	-0.0019	0.4087	-0.0828	0.1452	-0.0562	-0.0333	0	0	-0.5317	0.1415	-0.3528	0.141	-0.5653	-0.2456	-0.5299	0.164	-0.0098	0.4187	-0.0586	-0.2864	-0.1331	0.1799	-0.1631	-4.3857
2018-11-13 09:46:00	(4):Percolator:	1.0949	0.7472	0.0447	0.0013	-0.0011	-75.6544	0.1111	-298.407	-0.0007	0.0761	-0.1658	0.3167	-0.1543	-0.2342	0	0	-0.7115	0.225	-0.8344	0.0245	-0.0333	-0.0124	-0.3822	0.1173	-0.0099	0.3107	-0.4598	-0.001	-1.3574	0.0006	-2.0692	-0.1939
2018-11-13 09:46:00	(4):Percolator:	After all training done, 2902 target PSMs with q<0.0100 were found when measuring on the test set
2018-11-13 09:46:00	(4):Percolator:	Found 2902 target PSMs scoring over 1.0000% FDR level on testset
2018-11-13 09:46:00	(4):Percolator:	Merging results from 3 datasets
2018-11-13 09:47:00	(4):Percolator:	Tossing out "redundant" PSMs keeping only the best scoring PSM for each unique peptide.
2018-11-13 09:47:00	(4):Percolator:	Selecting pi_0=0.9323
2018-11-13 09:47:00	(4):Percolator:	Calibrating statistics - calculating q values
2018-11-13 09:47:00	(4):Percolator:	PSMId	score	q-value	posterior_error_prob	peptide	proteinIds
2018-11-13 09:47:00	(4):Percolator:	New pi_0 estimate on merged list gives 1777 peptides over q=0.0100
2018-11-13 09:47:00	(4):Percolator:	Calibrating statistics - calculating Posterior error probabilities (PEPs)
2018-11-13 09:47:00	(4):Percolator:	Processing took 54.09 cpu seconds or 54 seconds wall time
2018-11-13 09:48:00	(4):Percolator:	2940/32 high confident target/decoy peptides were found for Sequest HT (2).
2018-11-13 09:48:00	(4):Percolator:	1090/192 medium confident target/decoy peptides were found for Sequest HT (2).
2018-11-13 09:48:00	(4):Percolator:	-- Total execution of Percolator (64Bit) for Sequest HT (2) took 7 min 53 s --
2018-11-13 09:48:00	(5):ptmRS:	Starting ptmRS node 2.0, ptmRS 2.2.5967.19588 - based on phosphoRS3 Taus T. et al., J. Proteome Res. 2011, 10, 5354-62
2018-11-13 09:48:00	(5):ptmRS:	More nodes and documentations can be found here http://ms.imp.ac.at/?goto=pd-nodes.
2018-11-13 09:48:00	(5):ptmRS:	Scoring with ptmRS (2.2.5967.19588) for Sequest HT (2) with a fragment ion mass tolerance of 0.6 m/z allowing a maximum of 10 PTMs with neutral loss and 500 isoforms per peptide.
2018-11-13 09:48:00	(5):ptmRS:	(5) Localizing 1xPhospho, elementTarget: S (delta mass: 79.9663, Neutral-losses:-H(3) O(4) P - 97.976896)
2018-11-13 09:48:00	(5):ptmRS:	(5) Localizing 1xPhospho, elementTarget: T (delta mass: 79.9663, Neutral-losses:-H(3) O(4) P - 97.976896)
2018-11-13 09:48:00	(5):ptmRS:	(5) FITs for CID_CAD: b, y; FITs with NLs: no
2018-11-13 09:48:00	(5):ptmRS:	(5) FITs for HCD: b, y; FITs with NLs: b, y
2018-11-13 09:48:00	(5):ptmRS:	(5) FITs for ECD_ETD: c, zRadical, zPrime; FITs with NLs: no
2018-11-13 09:48:00	(5):ptmRS:	(5) FITs for EThcD: b, y, c, zRadical, zPrime; FITs with NLs: b, y
2018-11-13 09:48:00	(5):ptmRS:	(5) Workload level: #spectra: 69188.
2018-11-13 09:48:00	(5):ptmRS:	(5) Workload level: #spectra per package: 40000.
2018-11-13 09:49:00	(5):ptmRS:	(5) Workload level: #parallel tasks: 8.
2018-11-13 09:49:00	(5):ptmRS:	(5) Finished collecting spectra
2018-11-13 09:50:00	(5):ptmRS:	Writing current ptmRS results to file. Puffer has following size 22138
2018-11-13 09:50:00	(5):ptmRS:	-- Total execution of ptmRS (5) took 2 min 35 s --
2018-11-13 09:50:00	Job Execution:	Finalizing spectra took 5.6 s.
2018-11-13 09:50:00	Job Execution:	Finalizing tables took 27 ms.
2018-11-13 09:50:00	Job Execution:	Finished Y:\pipeline\ProteomicsLab\acapaldi\2018\110918\AC101118_110918_PD2_2\AC101118_110918_CP34_trypsin_digest.msf
2018-11-13 09:50:00	Job Execution:	----- Total Job execution took: 24 min 7 s. -----

## Sheet: Consensus
================================================================================
Consensus Step Workflow
================================================================================
Result name: AC101118_110918_CP34_trypsin_digest
Result file: Y:\proteomics-home\pipeline\ProteomicsLab\acapaldi\2018\110918\AC101118_110918_PD2_2\AC101118_110918_CP34_trypsin_digest.pdResult
Description: Result filtered for high confident peptides.
Workflow based on template: CWF_Basic_Exporter
Creation date: 11/13/2018 9:26:36 AM
Created with Discoverer version: 2.2.0.388
------------------------------------------------------------------
The pipeline tree:
------------------------------------------------------------------
|-(0) MSF Files
|-(1) PSM Grouper
|-(2) Peptide Validator
|-(3) Peptide and Protein Filter
|-(4) Protein Scorer
|-(5) Protein Grouping
|-(6) Protein FDR Validator
Post-processing nodes:
--------------------------------
|-(7) Display Settings
|-(8) Result Exporter
|-(9) Result Statistics
------------------------------------------------------------------
Processing node 0: MSF Files
------------------------------------------------------------------
1. Storage Settings:
#NAME?
#NAME?
2. Merging of Identified Peptide and Proteins:
#NAME?
- File Limit for Automatic Merge.: 10
3. FASTA Title Line Display:
#NAME?
#NAME?
4. PSM Filters:
- Maximum Delta Cn: 0.05
- Maximum Rank: 0
- Maximum Delta Mass: 0 ppm
Hidden Parameters:
#NAME?
------------------------------------------------------------------
Processing node 1: PSM Grouper
------------------------------------------------------------------
1. Peptide Group Modifications:
- Site Probability Threshold: 75
------------------------------------------------------------------
Processing node 2: Peptide Validator
------------------------------------------------------------------
1. General Validation Settings:
#NAME?
- Target FDR (Strict) for PSMs: 0.01
- Target FDR (Relaxed) for PSMs: 0.05
- Target FDR (Strict) for Peptides: 0.01
- Target FDR (Relaxed) for Peptides: 0.05
2. Specific Validator Settings:
#NAME?
- Use Concatenated FDR Calculation for PSM Level FDR Calculation Based on Score: False
- Reset Confidences for Nodes without Decoy Search (Fixed score thresholds): False
------------------------------------------------------------------
Processing node 3: Peptide and Protein Filter
------------------------------------------------------------------
1. Peptide Filters:
#NAME?
- Keep Lower Confident PSMs: False
- Minimum Peptide Length: 6
- Remove Peptides Without Protein Reference: False
2. Protein Filters:
- Minimum Number of Peptide Sequences: 1
- Count Only Rank 1 Peptides: False
- Count Peptides Only for Top Scored Protein: False
------------------------------------------------------------------
Processing node 4: Protein Scorer
------------------------------------------------------------------
No parameters
------------------------------------------------------------------
Processing node 5: Protein Grouping
------------------------------------------------------------------
1. Protein Grouping:
- Apply strict parsimony principle: True
------------------------------------------------------------------
Processing node 6: Protein FDR Validator
------------------------------------------------------------------
1. Confidence Thresholds:
- Target FDR (Strict): 0.01
- Target FDR (Relaxed): 0.05
------------------------------------------------------------------
Processing node 7: Display Settings
------------------------------------------------------------------
1. General:
- Filter Set: ### Filter Set MasterProteinFilter.filterset contains the following filters:
### Row Filter for TargetProtein:
### Master is equal to Master
###
#NAME?
------------------------------------------------------------------
Processing node 8: Result Exporter
------------------------------------------------------------------
1. Output Data:
- R-friendly Headers: False
------------------------------------------------------------------
Processing node 9: Result Statistics
------------------------------------------------------------------
No parameters
------------------------------------------------------------------
Workflow messages:
------------------------------------------------------------------
2018-11-13 09:50:00	Job Execution:	Processing Y:\pipeline\ProteomicsLab\acapaldi\2018\110918\AC101118_110918_PD2_2\AC101118_110918_CP34_trypsin_digest.pdResult
2018-11-13 09:50:00	(0):MSF Files:	Y:\pipeline\ProteomicsLab\acapaldi\2018\110918\AC101118_110918_PD2_2\AC101118_110918_CP34_trypsin_digest.msf
2018-11-13 09:50:00	(0):MSF Files:	All 1 files are ready for processing.
2018-11-13 09:50:00	(0):MSF Files:	Warnings reported in at least one input processing workflow (check processing summary).
2018-11-13 09:50:00	(0):MSF Files:	Start transferring results of 1 msf files...
2018-11-13 09:51:00	(0):MSF Files:	Transferred 6155 Proteins to result file in 19.3 s.
2018-11-13 09:51:00	(0):MSF Files:	Transferred 6264 Decoy Proteins to result file in 11.9 s.
2018-11-13 09:54:00	(0):MSF Files:	Added 48444 Mass Spectra to result file.
2018-11-13 09:54:00	(0):MSF Files:	Added 2 traces to result file.
2018-11-13 09:54:00	(0):MSF Files:	Added 1 Input Files to result file.
2018-11-13 09:55:00	(0):MSF Files:	Added 61050 PSMs to result file.
2018-11-13 09:55:00	(0):MSF Files:	Added 63244 Decoy PSMs to result file.
2018-11-13 09:55:00	(0):MSF Files:	Added 69188 MS/MS Spectrum Info to result file.
2018-11-13 09:55:00	(0):MSF Files:	Added 2 Specialized Traces to result file.
2018-11-13 09:55:00	(0):MSF Files:	Copying data took 4 min 43 s.
2018-11-13 09:56:00	(0):MSF Files:	Find unique PSM sequences in 13.3 s.
2018-11-13 09:56:00	(0):MSF Files:	Filtering proteins took 3.4 s.
2018-11-13 09:58:00	(0):MSF Files:	-- Total execution of MSF Files (0) took 7 min 32 s --
2018-11-13 10:01:00	(1):PSM Grouper:	Found 41091 peptides.
2018-11-13 10:04:00	(1):PSM Grouper:	Found 42944 decoy peptides.
2018-11-13 10:04:00	(1):PSM Grouper:	-- Total execution of PSM Grouper (1) took 5 min 40 s --
2018-11-13 10:04:00	(2):Peptide Validator:	Start PSM and Peptide validation in 'Automatic (Control peptide level error rate if possible)' mode...
2018-11-13 10:04:00	(2):Peptide Validator:	Updated PSM confidences in 17.2 s.
2018-11-13 10:04:00	(2):Peptide Validator:	Use svm score for 'peptide' qvality run.
2018-11-13 10:05:00	(2):Peptide Validator:	Updated peptide confidences using qvality in 53.2 s.
2018-11-13 10:05:00	(2):Peptide Validator:	Store Max PSM confidences for peptides.
2018-11-13 10:05:00	(2):Peptide Validator:	Calculating Mascot thresholds.
2018-11-13 10:05:00	(2):Peptide Validator:	-- Total execution of Peptide Validator (2) took 1 min 18 s --
2018-11-13 10:05:00	(3):Peptide and Protein Filter:	Filter 1849/41091 Peptide Groups (39242 excluded) and 2832/61050 PSMs (58218 excluded) took: 29.8 s
2018-11-13 10:05:00	(3):Peptide and Protein Filter:	Filter 567/6155 Proteins (5588 excluded) took: 9.4 s
2018-11-13 10:06:00	(3):Peptide and Protein Filter:	Filter 21/42944 Decoy Peptide Groups (42923 excluded) and 22/63244 Decoy PSMs (63222 excluded) took: 25.5 s
2018-11-13 10:06:00	(3):Peptide and Protein Filter:	Filter 23/6264 Decoy Proteins (6241 excluded) took: 2.8 s
2018-11-13 10:06:00	(3):Peptide and Protein Filter:	Updating counts took 21.9 s.
2018-11-13 10:06:00	(3):Peptide and Protein Filter:	-- Total execution of Peptide and Protein Filter (3) took 1 min 30 s --
2018-11-13 10:06:00	(4):Protein Scorer:	Calculating Coverage and Counts
2018-11-13 10:06:00	(4):Protein Scorer:	Calculated counts and coverages in 4.2 s.
2018-11-13 10:06:00	(4):Protein Scorer:	Scoring target proteins
2018-11-13 10:07:00	(4):Protein Scorer:	Scored 567 proteins in 9.6 s.
2018-11-13 10:07:00	(4):Protein Scorer:	Scoring decoy proteins
2018-11-13 10:07:00	(4):Protein Scorer:	Scored 23 decoy proteins in 1.8 s.
2018-11-13 10:07:00	(4):Protein Scorer:	-- Total execution of Protein Scorer (4) took 16.4 s --
2018-11-13 10:07:00	(5):Protein Grouping:	Retrieving 415 protein groups took 14.5 ms.
2018-11-13 10:07:00	(5):Protein Grouping:	Storing, updating and connecting protein groups, PSMs and peptides took 21 s.
2018-11-13 10:07:00	(5):Protein Grouping:	Check 415 protein groups.
2018-11-13 10:08:00	(5):Protein Grouping:	Applying strict parsimony took 29.5 s.
2018-11-13 10:08:00	(5):Protein Grouping:	Found 406 protein groups.
2018-11-13 10:08:00	(5):Protein Grouping:	Retrieving 21 decoy protein groups took 0.2 ms.
2018-11-13 10:08:00	(5):Protein Grouping:	Storing, updating and connecting protein groups, PSMs and peptides took 14.5 s.
2018-11-13 10:08:00	(5):Protein Grouping:	Found 21 decoy protein groups.
2018-11-13 10:08:00	(5):Protein Grouping:	-- Total execution of Protein Grouping (5) took 1 min 31 s --
2018-11-13 10:08:00	(6):Protein FDR Validator:	Apply confidences based on protein scores of 567 proteins.
2018-11-13 10:08:00	(6):Protein FDR Validator:	Calculating Sum PEP Score for Proteins
2018-11-13 10:08:00	(6):Protein FDR Validator:	Calculating Sum PEP Score for Decoy Proteins
2018-11-13 10:08:00	(6):Protein FDR Validator:	-- Total execution of Protein FDR Validator (6) took 14.1 s --
2018-11-13 10:08:00	(9):Result Statistics:	-- Total execution of Result Statistics (9) took 6.1 s --
2018-11-13 10:08:00	(7):Display Settings:	Applying display filter and default layout
2018-11-13 10:09:00	(7):Display Settings:	-- Total execution of Display Settings (7) took 326.1 ms --
2018-11-13 10:09:00	(8):Result Exporter:	Start exporting results to Y:\pipeline\ProteomicsLab\acapaldi\2018\110918\AC101118_110918_PD2_2\AC101118_110918_CP34_trypsin_digest.txt...
2018-11-13 10:09:00	(8):Result Exporter:	-- Total execution of Result Exporter (8) took 10.2 s --
2018-11-13 10:10:00	Job Execution:	Finalizing file took 55.4 s.
2018-11-13 10:10:00	Job Execution:	Finished Y:\pipeline\ProteomicsLab\acapaldi\2018\110918\AC101118_110918_PD2_2\AC101118_110918_CP34_trypsin_digest.pdResult
2018-11-13 10:10:00	Job Execution:	----- Total Job execution took: 19 min 21 s. -----
