# Supplementary material for: The Molecular Logic of Gtr1/2 and Pib2 Dependent TORC1 Regulation in Budding Yeast
Source: bioRxiv preprint, doi:10.1101/2023.12.06.570342, version 2 (2025-05-19)
Supplement: Table S8 [file 570342_file20.xlsx]

## Sheet: Proteins 1% FDR
Protein FDR Confidence: Combined	Master	Accession	Description	Exp. q-value: Combined	Sum PEP Score	Coverage [%]	# Peptides	# PSMs	# Unique Peptides	# Protein Groups	# AAs	MW [kDa]	calc. pI	Score Sequest HT: Sequest HT	# Peptides (by Search Engine): Sequest HT
High	Master Protein	sp	K22E_HUMAN	0	228.676	74	48	152	36	1	645	65.8	8	401.17	48
	Confidence	Sequence	Modifications	Qvality PEP	Qvality q-value	# Protein Groups	# Proteins	# PSMs	Master Protein Accessions	# Missed Cleavages	Theo. MH+ [Da]	Confidence (by Search Engine): Sequest HT	Percolator q-Value (by Search Engine): Sequest HT	Percolator PEP (by Search Engine): Sequest HT	XCorr (by Search Engine): Sequest HT
	High	MSGDLSSNVTVSVTSSTISSNVASK	1xOxidation [M1]	4.85873e-08	0	1	1	3	sp	0	2474.19	High	0	1.232e-05	5.57
	High	MSGDLSSNVTVSVTSSTISSNVASK		6.41911e-06	0	1	1	2	sp	0	2458.2	High	0	0.0001308	4.53
	High	NLDLDSIIAEVK		4.55297e-06	0	4	9	4	IPI00300725 IPI:IPI00300725.6; IPI00299145 IPI:IPI00299145.8; sp; IPI00009867 IPI:IPI00009867.2	0	1329.73	High	0	0.000136	3.76
	High	NKLNDLEEALQQAK		0.000164039	0	1	1	3	sp	1	1613.85	High	0	0.0006258	3.71
	High	LNDLEEALQQAK		6.86534e-06	0	1	1	2	sp	0	1371.71	High	0	0.0001349	4.36
	High	SISISVAGGGGGFGAAGGFGGR		3.38622e-07	0	1	1	5	sp	0	1838.91	High	0	3.053e-05	5.06
	High	SKEEAEALYHSK		1.49258e-05	0	1	1	6	sp	1	1391.68	High	0	0.0001964	4.79
	High	NVQDAIADAEQR		1.59634e-05	0	1	1	2	sp	0	1329.64	High	0.0004637	0.0007277	3.61
	High	HGGGGGGFGGGGFGSR		4.86947e-06	0	1	1	3	sp	0	1320.58	High	0	0.0006318	3.69
	High	FLEQQNQVLQTK		2.80218e-06	0	3	4	13	sp; IPI00376379 IPI:IPI00376379.1; IPI00556624 IPI:IPI00556624.1	0	1475.79	High	0	8.717e-05	4.86
	High	GGSGGGGSISGGGYGSGGGSGGR		6.46994e-09	0	1	1	2	sp	0	1741.75	High	0	4.258e-06	4.56
	High	GFSSGSAVVSGGSR		4.90597e-06	0	1	1	5	sp	0	1254.61	High	0	0.0001224	3.99
	High	GGSISGGGYGSGGGK		0.000118102	0	1	1	2	sp	0	1197.55	High	0.0004637	0.0008608	2.72
	High	GSSSGGGYSSGSSSYGSGGR		1.62531e-09	0	1	1	2	sp	0	1740.71	High	0	2.142e-06	5.61
	High	LALDVEIATYR		7.26878e-05	0	4	11	7	IPI00300725 IPI:IPI00300725.6; IPI00299145 IPI:IPI00299145.8; sp; IPI00009867 IPI:IPI00009867.2	0	1263.69	High	0	0.0004051	3.37
	High	VDLLNQEIEFLK		1.47046e-05	0	1	1	5	sp	0	1460.8	High	0	0.000195	4.47
	High	TSQNSELNNMQDLVEDYKK	1xOxidation [M10]	3.90241e-07	0	1	1	3	sp	1	2272.04	High	0	3.275e-05	6.53
	High	TSQNSELNNMQDLVEDYKK		3.77762e-06	0	1	1	3	sp	1	2256.04	High	0	0.000101	4.28
	High	TSQNSELNNMQDLVEDYK	1xOxidation [M10]	4.46383e-07	0	1	1	1	sp	0	2143.94	High	0	3.497e-05	5.03
	High	TSQNSELNNMQDLVEDYK		0.000111253	0	1	1	1	sp	0	2127.95	High	0	0.0004835	3.24
	High	YEELQVTVGR		0.000148864	0	1	1	13	sp	0	1193.62	High	0	0.0005431	3.25
	High	VLYDAEISQIHQSVTDTNVILSMDNSR	1xOxidation [M23]	2.77403e-05	0	1	1	1	sp	0	3064.49	High	0	0.0002631	3.8
	High	WELLQQMNVGTRPINLEPIFQGYIDSLKR	1xOxidation [M7]	0.000224466	0	1	1	1	sp	1	3474.82	High	0	0.000629	3.4
	High	TAAENDFVTLK		2.79482e-05	0	1	1	1	sp	0	1208.62	High	0	0.0002641	4.2
	High	TAAENDFVTLKK		0.000191888	0	1	1	2	sp	1	1336.71	High	0	0.0005947	4.28
	High	IEISELNR		0.00148562	0.000649755	2	3	4	sp; IPI00556624 IPI:IPI00556624.1	0	973.531	High	0.0009108	0.001922	2.65
	High	KDVDNAYMIK		0.00100712	0.000649755	1	1	1	sp	1	1196.6	High	0.0004637	0.001008	2.79
	High	GGGFGGGSGFGGGSGFGGGSGFSGGGFGGGGFGGGR		0.00153073	0.000649755	1	1	1	sp	0	2831.19	High	0.0004637	0.001175	2.98
	High	STSSFSCLSR	1xCarbamidomethyl [C7]	0.000693183	0.000649755	1	1	2	sp	0	1131.51	High	0.0004637	0.0008883	2.67
	High	LNDLEEALQQAKEDLAR		0.000992182	0.000649755	1	1	1	sp	1	1956	High	0.0004637	0.001002	3.32
	High	AQYEEIAQR		0.00130828	0.000649755	3	7	2	IPI00300725 IPI:IPI00300725.6; IPI00299145 IPI:IPI00299145.8; sp	0	1107.54	High	0.0009108	0.002008	2.56
	High	DVDNAYMIK	1xOxidation [M7]	0.00555333	0.00106559	1	1	9	sp	0	1084.5	High	0.001627	0.00534	2.55
	High	DVDNAYMIK		0.00635745	0.00106559	1	1	1	sp	0	1068.5	High	0.0009108	0.0024	2.54
	High	NVQDAIADAEQRGEHALKDAR		0.00293549	0.00106559	1	1	1	sp	2	2307.14	High	0.0009108	0.00155	3.45
	High	RSTSSFSCLSR	1xCarbamidomethyl [C8]	0.0051516	0.00106559	1	1	1	sp	1	1287.61	High	0.0009108	0.002091	3.59
	High	LQGEIAHVKK		0.0109275	0.00106559	1	1	2	sp	1	1122.66	High	0.00103	0.003692	2.91
	High	DYQELMNVK		0.00796601	0.00106559	1	4	1	sp	0	1139.54	High	0.00103	0.002839	2.88
	High	EEAEALYHSK		0.00252715	0.00106559	1	1	2	sp	0	1176.55	High	0.0009108	0.001448	2.5
	High	YLDGLTAER		0.00507482	0.00106559	1	1	3	sp	0	1037.53	High	0.0009108	0.002073	1.89
	High	KYEDEINKR		0.00716994	0.00106559	1	3	3	sp	2	1194.61	High	0.00103	0.002628	3.04
	High	KLLEGEECR	1xCarbamidomethyl [C8]	0.00359378	0.00106559	5	12	1	IPI00174775 IPI:IPI00174775.1; IPI00300725 IPI:IPI00300725.6; IPI00299145 IPI:IPI00299145.8; sp; IPI00009867 IPI:IPI00009867.2	1	1133.56	High	0.0009108	0.001712	3.58
	High	GGGGGGFR		0.0051516	0.00106559	1	1	4	sp	0	664.316	High	0.0009108	0.002091	2.15
	High	LALDVEIATYRK		0.00477904	0.00106559	4	11	1	IPI00300725 IPI:IPI00300725.6; IPI00299145 IPI:IPI00299145.8; sp; IPI00009867 IPI:IPI00009867.2	1	1391.79	High	0.0009108	0.002002	2.8
	High	LLRDYQELMNVK	1xOxidation [M9]	0.00297981	0.00106559	1	4	1	sp	1	1537.8	High	0.0009108	0.001557	3.06
	High	YEDEINK		0.0121425	0.00132229	6	16	1	IPI00300725 IPI:IPI00300725.6; IPI00299145 IPI:IPI00299145.8; sp; IPI00009867 IPI:IPI00009867.2; IPI00376379 IPI:IPI00376379.1; IPI00556624 IPI:IPI00556624.1	0	910.415	High	0.001205	0.004075	1.4
	High	LLEGEECR	1xCarbamidomethyl [C7]	0.0153358	0.00162885	6	13	1	IPI00174775 IPI:IPI00174775.1; IPI00300725 IPI:IPI00300725.6; IPI00299145 IPI:IPI00299145.8; sp; IPI00009867 IPI:IPI00009867.2; IPI00166205 IPI:IPI00166205.2	0	1005.47	High	0.001424	0.005102	2.03
	High	LQGEIAHVK		0.0161659	0.00191257	1	1	2	sp	0	994.568	High	0.001627	0.005385	1.47
	High	FASFIDK		0.0201104	0.00210976	8	22	3	IPI00174775 IPI:IPI00174775.1; IPI00300725 IPI:IPI00300725.6; IPI00299145 IPI:IPI00299145.8; sp; IPI00009867 IPI:IPI00009867.2; IPI00061200 IPI:IPI00061200.1; IPI00103481 IPI:IPI00103481.1; IPI00376379 IPI:IPI00376379.1	0	827.43	High	0.001783	0.00956	2.57
	High	SLVGLGGTK		0.0223443	0.00216078	1	1	2	sp	0	831.493	High	0.001783	0.00769	2.13
	High	STSSFSCLSR		0.0221768	0.00216078	1	1	1	sp	0	1074.49	High	0.001783	0.00757	1.7
	High	KDVDNAYMIK	1xOxidation [M8]	0.0269633	0.00216078	1	1	2	sp	1	1212.59	High	0.001783	0.009519	2.48
	High	YEDEINKR		0.0353175	0.00335822	6	15	2	IPI00300725 IPI:IPI00300725.6; IPI00299145 IPI:IPI00299145.8; sp; IPI00009867 IPI:IPI00009867.2; IPI00376379 IPI:IPI00376379.1; IPI00556624 IPI:IPI00556624.1	1	1066.52	High	0.002654	0.01318	2.13
	High	FASFIDKVR		0.0374948	0.00354048	8	21	1	IPI00174775 IPI:IPI00174775.1; IPI00300725 IPI:IPI00300725.6; IPI00299145 IPI:IPI00299145.8; sp; IPI00009867 IPI:IPI00009867.2; IPI00061200 IPI:IPI00061200.1; IPI00103481 IPI:IPI00103481.1; IPI00376379 IPI:IPI00376379.1	1	1082.6	High	0.00279	0.01425	2.39
	High	NKLNDLEEALQQAKEDLAR		0.046892	0.0050128	1	1	1	sp	2	2198.14	High	0.003872	0.01889	3.42
	High	DYQELMNVK	1xOxidation [M6]	0.0531956	0.00576207	1	4	3	sp	0	1155.54	High	0.004998	0.0244	2.52
High	Master Protein	YIL074C	SER33 SGDID:S000001336, Chr IX from 222490-221081, Genome Release 64-2-1, reverse complement, Verified ORF, "3-phosphoglycerate dehydrogenase; catalyzes the first step in serine and glycine biosynthesis; SER33 has a paralog, SER3, that arose from the whole genome duplication"	0	226.572	68	32	527	17	1	469	51.2	6.42	1566.98	32
	Confidence	Sequence	Modifications	Qvality PEP	Qvality q-value	# Protein Groups	# Proteins	# PSMs	Master Protein Accessions	# Missed Cleavages	Theo. MH+ [Da]	Confidence (by Search Engine): Sequest HT	Percolator q-Value (by Search Engine): Sequest HT	Percolator PEP (by Search Engine): Sequest HT	XCorr (by Search Engine): Sequest HT
	High	MLSAPQFAAMKDGAYVINASR	2xOxidation [M1; M10]	2.96033e-07	0	2	2	1	YIL074C; YER081W	1	2273.11	High	0	2.855e-05	5.51
	High	MLSAPQFAAMK	2xOxidation [M1; M10]	4.21425e-05	0	2	2	28	YIL074C; YER081W	0	1226.59	High	0	0.0003877	3.29
	High	MLSAPQFAAMK	1xOxidation [M]	6.95029e-05	0	2	2	21	YIL074C; YER081W	0	1210.6	High	0.0009108	0.001446	3.47
	High	NLVCIGCFCIGTNQVDLK	3xCarbamidomethyl [C4; C7; C9]	4.7616e-06	0	1	1	2	YIL074C	0	2111.01	High	0	0.0001698	4.82
	High	SDFVTLHVPATPETEK		5.31422e-08	0	2	2	42	YIL074C; YER081W	0	1770.89	High	0	4.386e-05	5.6
	High	SIELHTGTWNK		0.000158027	0	2	2	23	YIL074C; YER081W	0	1285.65	High	0.001767	0.006138	3.5
	High	SLDYDQENTVR		1.42719e-05	0	1	1	19	YIL074C	0	1339.61	High	0	0.0002755	3.22
	High	QFSDSHGEIAYLMADISSVNQSEIK	1xOxidation [M13]	3.95238e-09	0	1	1	28	YIL074C	0	2785.3	High	0	3.338e-06	6.82
	High	QFSDSHGEIAYLMADISSVNQSEIK		3.37874e-09	0	1	1	7	YIL074C	0	2769.3	High	0	3.08e-06	6.79
	High	NVPGVLKTVNDILSDHNIEK		9.58192e-05	0	1	1	2	YIL074C	1	2205.19	High	0	0.0004557	2.53
	High	QFSDSHGEIAYLMADISSVNQSEIKDIYEK	1xOxidation [M13]	4.04192e-09	0	1	1	12	YIL074C	1	3433.61	High	0	1.034e-05	6.16
	High	QVSTLDELLNK		0.000145566	0	2	2	20	YIL074C; YER081W	0	1259.68	High	0.0009108	0.00163	3.53
	High	GTVVDIPSLIQAVK		3.80594e-06	0	2	2	25	YIL074C; YER081W	0	1439.85	High	0.0004637	0.0009918	3.59
	High	GIAVFNSPFSNSR		1.22005e-05	0	2	2	40	YIL074C; YER081W	0	1395.7	High	0	0.0005182	3.85
	High	IAGAALDVYPHEPAK		4.30023e-07	0	2	2	43	YIL074C; YER081W	0	1551.82	High	0	0.0001019	5.14
	High	IFKDQGYQVEFHK		2.50525e-06	0	1	1	5	YIL074C	1	1638.83	High	0	8.228e-05	4.86
	High	AMNFSGSPGAVSTSPTQSFMNTLPR		5.35405e-08	0	1	1	2	YIL074C	0	2585.21	High	0	1.22e-05	6.11
	High	AMNFSGSPGAVSTSPTQSFMNTLPR	1xOxidation [M]	8.78749e-09	0	1	1	10	YIL074C	0	2601.21	High	0	4.959e-06	6.9
	High	AMNFSGSPGAVSTSPTQSFMNTLPR	2xOxidation [M2; M20]	4.16448e-09	0	1	1	23	YIL074C	0	2617.2	High	0	1.353e-05	6.8
	High	AMNFSGSPGAVSTSPTQSFMNTLPR	1xOxidation [M]; 1xPhospho [S5(98.9)]	1.70803e-08	0	1	1	6	YIL074C	0	2681.17	High	0	6.908e-06	7.01
	High	AMNFSGSPGAVSTSPTQSFMNTLPR	2xOxidation [M2; M20]; 1xPhospho [S18(98.6)]	1.33148e-07	0	1	1	7	YIL074C	0	2697.17	High	0	1.918e-05	6.77
	High	TVNDILSDHNIEK		1.72464e-06	0	1	1	39	YIL074C	0	1497.75	High	0	0.0003665	4.11
	High	ALKPFSTGDMNILLLENVNATAIK	1xOxidation [M10]	5.27468e-08	0	1	1	22	YIL074C	0	2589.4	High	0	1.211e-05	6.04
	High	ALKPFSTGDMNILLLENVNATAIK		2.34858e-07	0	1	1	5	YIL074C	0	2573.4	High	0	0.0004592	5.56
	High	YINEGNSVGSVNFPEVSLK		3.26212e-07	0	1	1	9	YIL074C	0	2053.02	High	0	2.988e-05	4.76
	High	SSLPEDELIEKIK		0.0002037	0	1	1	1	YIL074C	1	1500.82	High	0	0.0006083	3.29
	High	SVAELVIGEIISLAR		6.85019e-08	0	1	1	8	YIL074C	0	1569.92	High	0	0.0001796	4.82
	High	SSLPEDELIEK		0.000605984	0.000649755	1	1	6	YIL074C	0	1259.64	High	0.007424	0.04528	2.73
	High	SIELHTGTWNKVAAR		0.000984795	0.000649755	2	2	1	YIL074C; YER081W	1	1682.9	High	0.0004637	0.0009991	2.6
	High	GTVVDIPSLIQAVKANK		0.00129854	0.000649755	2	2	2	YIL074C; YER081W	1	1753.02	High	0.0004637	0.001105	2.86
	High	QVSTLDELLNKSDFVTLHVPATPETEK		0.00123233	0.000649755	2	2	3	YIL074C; YER081W	1	3011.56	High	0.0004637	0.001084	3.31
	High	MLSAPQFAAMK		0.000601475	0.000649755	2	2	3	YIL074C; YER081W	0	1194.6	High	0.0004637	0.0008507	3.03
	High	IKDVHAIGIR		0.000913889	0.000649755	2	2	18	YIL074C; YER081W	1	1121.68	High	0.0009108	0.001961	3.48
	High	LNQTSAKVSIR		0.00143109	0.000649755	1	1	1	YIL074C	1	1216.7	High	0.0004637	0.001147	2.72
	High	DQGYQVEFHK		0.000583773	0.000649755	1	1	8	YIL074C	0	1250.58	High	0.0004637	0.001032	3.41
	High	DQGYQVEFHKSSLPEDELIEK		0.00115215	0.000649755	1	1	1	YIL074C	1	2491.2	High	0.0004637	0.001056	3.88
	High	DGAYVINASR		0.000309452	0.000649755	2	2	19	YIL074C; YER081W	0	1065.53	High	0.0009108	0.001756	3.53
	High	MLSAPQFAAMKDGAYVINASR	1xOxidation [M]	0.00356694	0.00106559	2	2	3	YIL074C; YER081W	1	2257.11	High	0.0009108	0.001701	3
	High	SDFVTLHVPATPETEKMLSAPQFAAMK	2xOxidation [M17; M26]	0.0282057	0.00216078	2	2	1	YIL074C; YER081W	1	2978.46	High	0.001783	0.01002	3.78
	High	DVHAIGIR		0.0290653	0.00216078	2	2	4	YIL074C; YER081W	0	880.5	High	0.00553	0.0293	2.1
	High	VLYIHR		0.0313291	0.00239809	1	1	7	YIL074C	0	800.478	High	0.001955	0.01139	1.76
High	Master Protein	IPI00556624 IPI:IPI00556624.1	TREMBL:Q6GSJ0 REFSEQ_NP:NP_006112|ENSEMBL:ENSP00000252244 Tax_Id=9606 Keratin 1	0	217.373	54	48	213	41	1	644	66	8.12	554.47	48
	Confidence	Sequence	Modifications	Qvality PEP	Qvality q-value	# Protein Groups	# Proteins	# PSMs	Master Protein Accessions	# Missed Cleavages	Theo. MH+ [Da]	Confidence (by Search Engine): Sequest HT	Percolator q-Value (by Search Engine): Sequest HT	Percolator PEP (by Search Engine): Sequest HT	XCorr (by Search Engine): Sequest HT
	High	LNDLEDALQQAKEDLAR		3.94034e-05	0	1	2	1	IPI00556624 IPI:IPI00556624.1	1	1941.99	High	0	0.0003097	4.1
	High	MSGECAPNVSVSVSTSHTTISGGGSR	1xCarbamidomethyl [C5]; 1xOxidation [M1]	8.42105e-07	0	1	2	1	IPI00556624 IPI:IPI00556624.1	0	2581.16	High	0	4.789e-05	4.12
	High	MSGECAPNVSVSVSTSHTTISGGGSR	1xCarbamidomethyl [C5]	8.98657e-09	0	1	2	1	IPI00556624 IPI:IPI00556624.1	0	2565.17	High	0	5.013e-06	5.14
	High	NMQDMVEDYR	2xOxidation [M2; M5]	0.000112927	0	1	2	20	IPI00556624 IPI:IPI00556624.1	0	1332.52	High	0	0.0005959	3.09
	High	NKLNDLEDALQQAKEDLAR		1.54936e-05	0	1	2	2	IPI00556624 IPI:IPI00556624.1	2	2184.13	High	0	0.0002	4.55
	High	LNDLEDALQQAK		2.42514e-05	0	1	2	3	IPI00556624 IPI:IPI00556624.1	0	1357.7	High	0	0.0002475	4.6
	High	SGGGFSSGSAGIINYQR		5.64136e-08	0	1	2	3	IPI00556624 IPI:IPI00556624.1	0	1657.79	High	0	1.249e-05	4.85
	High	SLNNQFASFIDK		3.96987e-05	0	1	2	5	IPI00556624 IPI:IPI00556624.1	0	1383.69	High	0	0.0003101	4.13
	High	SKAEAESLYQSK		0.000180761	0	1	2	9	IPI00556624 IPI:IPI00556624.1	1	1340.67	High	0.0004637	0.0009586	4.32
	High	QISNLQQSISDAEQRGENALK		2.01745e-06	0	1	2	1	IPI00556624 IPI:IPI00556624.1	1	2329.17	High	0	7.394e-05	3.94
	High	QISNLQQSISDAEQR		5.84059e-07	0	1	2	8	IPI00556624 IPI:IPI00556624.1	0	1716.85	High	0	4.002e-05	4.86
	High	KQISNLQQSISDAEQR		3.08785e-06	0	1	2	2	IPI00556624 IPI:IPI00556624.1	1	1844.95	High	0	9.13e-05	5.42
	High	FLEQQNQVLQTK		2.80218e-06	0	3	4	13	sp; IPI00376379 IPI:IPI00376379.1; IPI00556624 IPI:IPI00556624.1	0	1475.79	High	0	8.717e-05	4.86
	High	GSGGGSSGGSIGGR		1.16659e-05	0	1	2	3	IPI00556624 IPI:IPI00556624.1	0	1092.5	High	0	0.0002583	4.43
	High	FSSCGGGGGSFGAGGGFGSR	1xCarbamidomethyl [C4]	5.09475e-09	0	1	2	3	IPI00556624 IPI:IPI00556624.1	0	1765.73	High	0	4.001e-06	5.32
	High	LALDLEIATYR		2.81577e-05	0	2	7	28	IPI00431749 IPI:IPI00431749.1; IPI00556624 IPI:IPI00556624.1	0	1277.71	High	0	0.0002646	3.57
	High	LDSELKNMQDMVEDYR	2xOxidation [M8; M11]	1.62036e-05	0	1	2	1	IPI00556624 IPI:IPI00556624.1	1	2017.88	High	0	0.000204	4.2
	High	THNLEPYFESFINNLR		5.06803e-07	0	1	2	11	IPI00556624 IPI:IPI00556624.1	0	1993.98	High	0	4.562e-05	6.28
	High	TNAENEFVTIK		0.000178082	0	1	2	2	IPI00556624 IPI:IPI00556624.1	0	1265.64	High	0	0.0005802	3.73
	High	TNAENEFVTIKK		0.00021786	0	1	2	2	IPI00556624 IPI:IPI00556624.1	1	1393.73	High	0	0.0006215	4.01
	High	YEELQITAGR		0.000211449	0	1	2	12	IPI00556624 IPI:IPI00556624.1	0	1179.6	High	0.0004637	0.001155	3.25
	High	WELLQQVDTSTR		1.826e-05	0	1	2	3	IPI00556624 IPI:IPI00556624.1	0	1475.75	High	0	0.0003234	3.75
	High	NMQDMVEDYR	1xOxidation [M]	0.000381409	0.000649755	1	2	6	IPI00556624 IPI:IPI00556624.1	0	1316.52	High	0.0004637	0.0007413	3.26
	High	IEISELNR		0.00148562	0.000649755	2	3	4	sp; IPI00556624 IPI:IPI00556624.1	0	973.531	High	0.0009108	0.001922	2.65
	High	SLNNQFASFIDKVR		0.000648117	0.000649755	1	2	1	IPI00556624 IPI:IPI00556624.1	1	1638.86	High	0.0004637	0.0008701	3.18
	High	SLDLDSIIAEVK		0.000252951	0.000649755	1	2	10	IPI00556624 IPI:IPI00556624.1	0	1302.72	High	0.0004637	0.0006533	4.03
	High	KDVDGAYMTK		0.000798891	0.000649755	1	2	1	IPI00556624 IPI:IPI00556624.1	1	1127.54	High	0.0004637	0.0009313	3
	High	THNLEPYFESFINNLRR		0.000810918	0.000649755	1	2	2	IPI00556624 IPI:IPI00556624.1	1	2150.08	High	0.0004637	0.0009351	3.72
	High	NMQDMVEDYR		0.0015538	0.000649755	1	2	1	IPI00556624 IPI:IPI00556624.1	0	1300.53	High	0.0004637	0.001184	2.65
	High	DVDGAYMTK	1xOxidation [M7]	0.000920743	0.000649755	1	2	15	IPI00556624 IPI:IPI00556624.1	0	1015.44	High	0.0009108	0.002493	2.42
	High	AEAESLYQSK		0.000247347	0.000649755	1	2	2	IPI00556624 IPI:IPI00556624.1	0	1125.54	High	0.0004637	0.0006492	3.32
	High	DYQELMNTK	1xOxidation [M6]	0.000962963	0.000649755	1	2	12	IPI00556624 IPI:IPI00556624.1	0	1157.51	High	0.0004637	0.000992	2.48
	High	NSKIEISELNR		0.00193024	0.00106559	1	2	1	IPI00556624 IPI:IPI00556624.1	1	1302.7	High	0.0008405	0.00129	3.3
	High	DVDGAYMTK		0.00373105	0.00106559	1	2	3	IPI00556624 IPI:IPI00556624.1	0	999.445	High	0.001783	0.008638	2.77
	High	RTNAENEFVTIK		0.00738887	0.00106559	1	2	1	IPI00556624 IPI:IPI00556624.1	1	1421.74	High	0.00103	0.002686	3.41
	High	NKYEDEINKR		0.00187332	0.00106559	4	10	6	IPI00300725 IPI:IPI00300725.6; IPI00299145 IPI:IPI00299145.8; IPI00009867 IPI:IPI00009867.2; IPI00556624 IPI:IPI00556624.1	2	1308.65	High	0.0008405	0.001275	3.55
	High	NKLNDLEDALQQAK		0.00295757	0.00106559	1	2	1	IPI00556624 IPI:IPI00556624.1	1	1599.83	High	0.0009108	0.001552	4.58
	High	DYQELMNTK		0.00252715	0.00106559	1	2	2	IPI00556624 IPI:IPI00556624.1	0	1141.52	High	0.0009108	0.001447	2.47
	High	AEAESLYQSKYEELQITAGR		0.00222516	0.00106559	1	2	1	IPI00556624 IPI:IPI00556624.1	1	2286.12	High	0.0008405	0.001371	2.37
	High	SLVNLGGSK		0.00291359	0.00106559	1	2	3	IPI00556624 IPI:IPI00556624.1	0	874.499	High	0.001627	0.005387	2.57
	High	AQYEDIAQK		0.0089177	0.00106559	1	1	2	IPI00556624 IPI:IPI00556624.1	0	1065.52	High	0.001205	0.004811	2.9
	High	KDVDGAYMTK	1xOxidation [M8]	0.00328466	0.00106559	1	2	3	IPI00556624 IPI:IPI00556624.1	1	1143.54	High	0.0009108	0.001631	3.72
	High	LLRDYQELMNTK	1xOxidation [M9]	0.00287026	0.00106559	1	2	1	IPI00556624 IPI:IPI00556624.1	1	1539.78	High	0.0009108	0.001532	3.25
	High	NKYEDEINK		0.0136975	0.00132229	4	11	1	IPI00300725 IPI:IPI00300725.6; IPI00299145 IPI:IPI00299145.8; IPI00009867 IPI:IPI00009867.2; IPI00556624 IPI:IPI00556624.1	1	1152.55	High	0.001205	0.004559	2.59
	High	YEDEINK		0.0121425	0.00132229	6	16	1	IPI00300725 IPI:IPI00300725.6; IPI00299145 IPI:IPI00299145.8; sp; IPI00009867 IPI:IPI00009867.2; IPI00376379 IPI:IPI00376379.1; IPI00556624 IPI:IPI00556624.1	0	910.415	High	0.001205	0.004075	1.4
	High	TLLEGEESR		0.0146582	0.00132229	1	2	1	IPI00556624 IPI:IPI00556624.1	0	1033.52	High	0.001205	0.004894	1.77
	High	SEIDNVKK		0.0267615	0.00216078	1	2	2	IPI00556624 IPI:IPI00556624.1	1	932.505	High	0.001783	0.009458	2.41
	High	YEDEINKR		0.0353175	0.00335822	6	15	2	IPI00300725 IPI:IPI00300725.6; IPI00299145 IPI:IPI00299145.8; sp; IPI00009867 IPI:IPI00009867.2; IPI00376379 IPI:IPI00376379.1; IPI00556624 IPI:IPI00556624.1	1	1066.52	High	0.002654	0.01318	2.13
	High	GENALKDAK		0.0410094	0.00422195	1	2	2	IPI00556624 IPI:IPI00556624.1	1	945.5	High	0.007853	0.05214	2.76
	High	LRSEIDNVK		0.0416257	0.00466421	1	2	1	IPI00556624 IPI:IPI00556624.1	1	1073.59	High	0.003615	0.01626	2.63
	High	FVSTTYSGVTR		0.0428855	0.00466421	1	2	1	IPI00556624 IPI:IPI00556624.1	0	1217.62	High	0.003615	0.01686	1.7
	High	SEIDNVK		0.0445127	0.0050128	1	2	1	IPI00556624 IPI:IPI00556624.1	0	804.41	High	0.003872	0.01764	1.85
	High	SISISVAR		0.0560228	0.00576207	1	2	1	IPI00556624 IPI:IPI00556624.1	0	832.489	High	0.00459	0.02369	1.92
	High	LRSEIDNVKK		0.0639721	0.00669503	1	2	1	IPI00556624 IPI:IPI00556624.1	2	1201.69	High	0.0054	0.02837	3.55
	High	LLRDYQELMNTK		0.0838145	0.00920304	1	2	1	IPI00556624 IPI:IPI00556624.1	1	1523.79	High	0.007212	0.04132	1.88
High	Master Protein	IPI00295684 IPI:IPI00295684.1	TREMBL:Q8N175 REFSEQ_NP:NP_000412|ENSEMBL:ENSP00000269576 Tax_Id=9606 Keratin 10	0	163.883	53	33	151	8	1	584	58.8	5.16	434.76	33
	Confidence	Sequence	Modifications	Qvality PEP	Qvality q-value	# Protein Groups	# Proteins	# PSMs	Master Protein Accessions	# Missed Cleavages	Theo. MH+ [Da]	Confidence (by Search Engine): Sequest HT	Percolator q-Value (by Search Engine): Sequest HT	Percolator PEP (by Search Engine): Sequest HT	XCorr (by Search Engine): Sequest HT
	High	ELTTEIDNNIEQISSYK		2.88836e-09	0	2	3	10	IPI00295684 IPI:IPI00295684.1; IPI00383111 IPI:IPI00383111.1	0	1996.97	High	0	2.854e-06	5.78
	High	SLLEGEGSSGGGGR		1.733e-05	0	2	3	2	IPI00295684 IPI:IPI00295684.1; IPI00383111 IPI:IPI00383111.1	0	1262.6	High	0	0.0002106	2.8
	High	SKELTTEIDNNIEQISSYK		3.85468e-08	0	2	3	4	IPI00295684 IPI:IPI00295684.1; IPI00383111 IPI:IPI00383111.1	1	2212.1	High	0	1.033e-05	6.35
	High	NVSTGDVNVEMNAAPGVDLTQLLNNMR	2xOxidation [M11; M26]	7.75698e-07	0	2	3	4	IPI00295684 IPI:IPI00295684.1; IPI00383111 IPI:IPI00383111.1	0	2904.38	High	0	4.596e-05	5.28
	High	NVSTGDVNVEMNAAPGVDLTQLLNNMR	1xOxidation [M]	4.68066e-08	0	2	3	2	IPI00295684 IPI:IPI00295684.1; IPI00383111 IPI:IPI00383111.1	0	2888.39	High	0	1.137e-05	4.93
	High	NVQALEIELQSQLALK		2.7066e-07	0	2	3	10	IPI00295684 IPI:IPI00295684.1; IPI00383111 IPI:IPI00383111.1	0	1797.01	High	0	3.527e-05	5.6
	High	QSVEADINGLR		0.000153377	0	2	6	2	IPI00295684 IPI:IPI00295684.1; IPI00383111 IPI:IPI00383111.1	0	1201.62	High	0	0.0005492	3.31
	High	RNVQALEIELQSQLALK		5.47534e-08	0	2	3	2	IPI00295684 IPI:IPI00295684.1; IPI00383111 IPI:IPI00383111.1	1	1953.11	High	0	1.233e-05	6.91
	High	QSLEASLAETEGR		5.7238e-05	0	2	3	6	IPI00295684 IPI:IPI00295684.1; IPI00383111 IPI:IPI00383111.1	0	1390.68	High	0	0.0003654	3.76
	High	KDAEAWFNEK		0.000187638	0	2	3	2	IPI00295684 IPI:IPI00295684.1; IPI00383111 IPI:IPI00383111.1	1	1237.58	High	0	0.0005909	4.24
	High	GSSGGGCFGGSSGGYGGLGGFGGGSFR	1xCarbamidomethyl [C7]	5.19428e-05	0	2	2	1	IPI00295684 IPI:IPI00295684.1; IPI00383111 IPI:IPI00383111.1	0	2342.98	High	0	0.0003507	3.74
	High	GSLGGGFSSGGFSGGSFSR		2.40811e-08	0	2	3	6	IPI00295684 IPI:IPI00295684.1; IPI00383111 IPI:IPI00383111.1	0	1707.77	High	0	8.198e-06	4.28
	High	ADLEMQIESLTEELAYLKK	1xOxidation [M5]	5.04357e-08	0	1	2	5	IPI00295684 IPI:IPI00295684.1	1	2240.14	High	0	1.181e-05	6.86
	High	ADLEMQIESLTEELAYLK	1xOxidation [M5]	2.07862e-06	0	1	2	2	IPI00295684 IPI:IPI00295684.1	0	2112.04	High	0	7.515e-05	4.76
	High	ALEESNYELEGK		1.45952e-05	0	2	3	5	IPI00295684 IPI:IPI00295684.1; IPI00383111 IPI:IPI00383111.1	0	1381.65	High	0	0.0001946	3.93
	High	ALEESNYELEGKIK		0.000183481	0	2	3	1	IPI00295684 IPI:IPI00295684.1; IPI00383111 IPI:IPI00383111.1	1	1622.83	High	0	0.0005854	3.37
	High	SQYEQLAEQNR		0.000104802	0	1	2	4	IPI00295684 IPI:IPI00295684.1	0	1365.64	High	0	0.0005438	3.45
	High	KNHEEEMKDLR		0.000361986	0.000649755	1	2	2	IPI00295684 IPI:IPI00295684.1	2	1428.69	High	0.0004637	0.0007299	3.76
	High	VTMQNLNDR	1xOxidation [M3]	0.000361986	0.000649755	6	8	20	IPI00295684 IPI:IPI00295684.1; IPI00384444 IPI:IPI00384444.4; IPI00328103 IPI:IPI00328103.1; IPI00383111 IPI:IPI00383111.1; IPI00375911 IPI:IPI00375911.1; IPI00217963 IPI:IPI00217963.2	0	1106.53	High	0.0004637	0.001192	2.91
	High	VTMQNLNDR		0.00151932	0.000649755	6	8	3	IPI00295684 IPI:IPI00295684.1; IPI00384444 IPI:IPI00384444.4; IPI00328103 IPI:IPI00328103.1; IPI00383111 IPI:IPI00383111.1; IPI00375911 IPI:IPI00375911.1; IPI00217963 IPI:IPI00217963.2	0	1090.53	High	0.0004637	0.001173	2.6
	High	LENEIQTYR		0.000829298	0.000649755	2	3	4	IPI00295684 IPI:IPI00295684.1; IPI00383111 IPI:IPI00383111.1	0	1165.58	High	0.0009108	0.002485	3.16
	High	NHEEEMKDLR		0.00148562	0.000649755	1	2	3	IPI00295684 IPI:IPI00295684.1	1	1300.6	High	0.0004637	0.001181	3.15
	High	NHEEEMKDLR	1xOxidation [M6]	0.000730392	0.000649755	1	2	3	IPI00295684 IPI:IPI00295684.1	1	1316.59	High	0.0009108	0.002185	3.25
	High	NQILNLTTDNANILLQIDNAR		0.000525821	0.000649755	2	3	3	IPI00295684 IPI:IPI00295684.1; IPI00383111 IPI:IPI00383111.1	0	2367.26	High	0.0004637	0.0008168	3.46
	High	DAEAWFNEK		0.00176449	0.000649755	4	5	11	IPI00295684 IPI:IPI00295684.1; IPI00328103 IPI:IPI00328103.1; IPI00383111 IPI:IPI00383111.1; IPI00375911 IPI:IPI00375911.1	0	1109.49	High	0.0004637	0.001244	2.98
	High	AETECQNTEYQQLLDIK	1xCarbamidomethyl [C5]	0.000677823	0.000649755	1	2	1	IPI00295684 IPI:IPI00295684.1	0	2082.96	High	0.0004637	0.0008826	3.02
	High	SEITELR		0.0103665	0.00106559	2	3	2	IPI00295684 IPI:IPI00295684.1; IPI00383111 IPI:IPI00383111.1	0	847.452	High	0.00103	0.003533	1.97
	High	QSVEADINGLRR		0.0112616	0.00106559	2	6	2	IPI00295684 IPI:IPI00295684.1; IPI00383111 IPI:IPI00383111.1	1	1357.72	High	0.00103	0.003798	2.01
	High	VLDELTLTK		0.00188739	0.00106559	1	3	3	IPI00295684 IPI:IPI00295684.1	0	1031.6	High	0.001205	0.003969	2.77
	High	SQYEQLAEQNRK		0.00214343	0.00106559	1	2	5	IPI00295684 IPI:IPI00295684.1	1	1493.73	High	0.0009108	0.001408	3.65
	High	LKYENEVALR		0.00356694	0.00106559	2	3	5	IPI00295684 IPI:IPI00295684.1; IPI00383111 IPI:IPI00383111.1	1	1234.68	High	0.0009108	0.00179	3.77
	High	LAADDFR		0.00784707	0.00106559	7	27	5	IPI00295684 IPI:IPI00295684.1; IPI00384444 IPI:IPI00384444.4; IPI00383111 IPI:IPI00383111.1; sp; IPI00217963 IPI:IPI00217963.2; IPI00450768 IPI:IPI00450768.4; IPI00290077 IPI:IPI00290077.1	0	807.4	High	0.00416	0.02124	2.21
	High	LASYLDK		0.00680237	0.00106559	7	14	6	IPI00295684 IPI:IPI00295684.1; IPI00384444 IPI:IPI00384444.4; IPI00383111 IPI:IPI00383111.1; IPI00217963 IPI:IPI00217963.2; IPI00450768 IPI:IPI00450768.4; IPI00290077 IPI:IPI00290077.1; IPI00019359 IPI:IPI00019359.2	0	809.44	High	0.001955	0.0117	2.31
	High	IRLENEIQTYR		0.0345334	0.00335822	2	3	2	IPI00295684 IPI:IPI00295684.1; IPI00383111 IPI:IPI00383111.1	1	1434.77	High	0.00416	0.02063	3.2
	High	LASYLDKVR		0.0416257	0.00466421	6	11	1	IPI00295684 IPI:IPI00295684.1; IPI00384444 IPI:IPI00384444.4; IPI00383111 IPI:IPI00383111.1; IPI00217963 IPI:IPI00217963.2; IPI00450768 IPI:IPI00450768.4; IPI00290077 IPI:IPI00290077.1	1	1064.61	High	0.003615	0.01631	2.06
	High	ADLEMQIESLTEELAYLKK		0.0552006	0.00576207	1	2	1	IPI00295684 IPI:IPI00295684.1	1	2224.14	High	0.00459	0.0233	2.04
	High	ELTTEIDNNIEQISSYKSEITELRR		0.0740665	0.00834875	2	3	1	IPI00295684 IPI:IPI00295684.1; IPI00383111 IPI:IPI00383111.1	2	2981.51	High	0.006477	0.03468	3.8
High	Master Protein	YER081W	SER3 SGDID:S000000883, Chr V from 322686-324095, Genome Release 64-2-1, Verified ORF, "3-phosphoglycerate dehydrogenase; catalyzes the first step in serine and glycine biosynthesis; SER3 has a paralog, SER33, that arose from the whole genome duplication"	0	160.288	60	26	384	11	1	469	51.2	5.57	1041.99	26
	Confidence	Sequence	Modifications	Qvality PEP	Qvality q-value	# Protein Groups	# Proteins	# PSMs	Master Protein Accessions	# Missed Cleavages	Theo. MH+ [Da]	Confidence (by Search Engine): Sequest HT	Percolator q-Value (by Search Engine): Sequest HT	Percolator PEP (by Search Engine): Sequest HT	XCorr (by Search Engine): Sequest HT
	High	MLSAPQFAAMKDGAYVINASR	2xOxidation [M1; M10]	2.96033e-07	0	2	2	1	YIL074C; YER081W	1	2273.11	High	0	2.855e-05	5.51
	High	MLSAPQFAAMK	2xOxidation [M1; M10]	4.21425e-05	0	2	2	28	YIL074C; YER081W	0	1226.59	High	0	0.0003877	3.29
	High	MLSAPQFAAMK	1xOxidation [M]	6.95029e-05	0	2	2	21	YIL074C; YER081W	0	1210.6	High	0.0009108	0.001446	3.47
	High	NLVCIGCFCIGTNQVDLDYATSR	3xCarbamidomethyl [C4; C7; C9]	2.49316e-07	0	1	1	1	YER081W	0	2676.22	High	0	2.614e-05	4.22
	High	SDFVTLHVPATPETEK		5.31422e-08	0	2	2	42	YIL074C; YER081W	0	1770.89	High	0	4.386e-05	5.6
	High	SLSYDQENTVR		4.47368e-05	0	1	1	13	YER081W	0	1311.62	High	0	0.0003278	2.85
	High	SIELHTGTWNK		0.000158027	0	2	2	23	YIL074C; YER081W	0	1285.65	High	0.001767	0.006138	3.5
	High	QFSDSNGEIAYLMADISSVDQSDIK	1xOxidation [M13]	5.65383e-06	0	1	1	1	YER081W	0	2749.25	High	0	0.0001229	4.01
	High	QVSTLDELLNK		0.000145566	0	2	2	20	YIL074C; YER081W	0	1259.68	High	0.0009108	0.00163	3.53
	High	GTVVDIPSLIQAVK		3.80594e-06	0	2	2	25	YIL074C; YER081W	0	1439.85	High	0.0004637	0.0009918	3.59
	High	GIAVFNSPFSNSR		1.22005e-05	0	2	2	40	YIL074C; YER081W	0	1395.7	High	0	0.0005182	3.85
	High	ILKPFSTGDMK		0.000211449	0	1	1	4	YER081W	0	1236.67	High	0.0004637	0.0006482	2.87
	High	IAGAALDVYPHEPAK		4.30023e-07	0	2	2	43	YIL074C; YER081W	0	1551.82	High	0	0.0001019	5.14
	High	TVNDILSNHNIEK		1.72011e-05	0	1	1	12	YER081W	0	1496.77	High	0	0.0002104	4.23
	High	YINEGNSVGSVNFPEVALK		3.52429e-08	0	1	1	3	YER081W	0	2037.03	High	0	5e-05	4.89
	High	VLYIHQNVPGVLK		1.59634e-05	0	1	1	21	YER081W	0	1479.87	High	0.0004637	0.000641	4.07
	High	SVAELVIAEIISLAR		2.66647e-07	0	1	1	3	YER081W	0	1583.94	High	0	4.259e-05	5.14
	High	SSLPEEELIEK		0.00037296	0.000649755	1	1	3	YER081W	0	1273.65	High	0.0004637	0.0007364	2.41
	High	SIELHTGTWNKVAAR		0.000984795	0.000649755	2	2	1	YIL074C; YER081W	1	1682.9	High	0.0004637	0.0009991	2.6
	High	GTVVDIPSLIQAVKANK		0.00129854	0.000649755	2	2	2	YIL074C; YER081W	1	1753.02	High	0.0004637	0.001105	2.86
	High	QVSTLDELLNKSDFVTLHVPATPETEK		0.00123233	0.000649755	2	2	3	YIL074C; YER081W	1	3011.56	High	0.0004637	0.001084	3.31
	High	MLSAPQFAAMK		0.000601475	0.000649755	2	2	3	YIL074C; YER081W	0	1194.6	High	0.0004637	0.0008507	3.03
	High	LTSNVLQHAK		0.00107719	0.000649755	1	1	5	YER081W	0	1110.63	High	0.0004637	0.001031	3.21
	High	ILKPFSTGDMK	1xOxidation [M10]	0.00050655	0.000649755	1	1	16	YER081W	0	1252.66	High	0.0008405	0.001353	2.98
	High	IKDVHAIGIR		0.000913889	0.000649755	2	2	18	YIL074C; YER081W	1	1121.68	High	0.0009108	0.001961	3.48
	High	QFSDSNGEIAYLMADISSVDQSDIK		0.000484355	0.000649755	1	1	1	YER081W	0	2733.26	High	0.0004637	0.000796	3.51
	High	DGAYVINASR		0.000309452	0.000649755	2	2	19	YIL074C; YER081W	0	1065.53	High	0.0009108	0.001756	3.53
	High	DIYEQLNQTSAK		0.000860863	0.000649755	1	1	4	YER081W	0	1409.69	High	0.0004637	0.001208	3.19
	High	MLSAPQFAAMKDGAYVINASR	1xOxidation [M]	0.00356694	0.00106559	2	2	3	YIL074C; YER081W	1	2257.11	High	0.0009108	0.001701	3
	High	SDFVTLHVPATPETEKMLSAPQFAAMK	2xOxidation [M17; M26]	0.0282057	0.00216078	2	2	1	YIL074C; YER081W	1	2978.46	High	0.001783	0.01002	3.78
	High	DVHAIGIR		0.0290653	0.00216078	2	2	4	YIL074C; YER081W	0	880.5	High	0.00553	0.0293	2.1
High	Master Protein	IPI00019359 IPI:IPI00019359.2	SWISS-PROT:P35527 REFSEQ_NP:NP_000217|ENSEMBL:ENSP00000246662 Tax_Id=9606 Keratin 9	0	156.533	62	37	112	36	1	623	62	5.24	294.85	37
	Confidence	Sequence	Modifications	Qvality PEP	Qvality q-value	# Protein Groups	# Proteins	# PSMs	Master Protein Accessions	# Missed Cleavages	Theo. MH+ [Da]	Confidence (by Search Engine): Sequest HT	Percolator q-Value (by Search Engine): Sequest HT	Percolator PEP (by Search Engine): Sequest HT	XCorr (by Search Engine): Sequest HT
	High	EEMSQLTGQNSGDVNVEINVAPGK	1xOxidation [M3]	2.36618e-07	0	1	2	1	IPI00019359 IPI:IPI00019359.2	0	2532.19	High	0	2.55e-05	5.15
	High	NHKEEMSQLTGQNSGDVNVEINVAPGKDLTK		1.62463e-06	0	1	2	1	IPI00019359 IPI:IPI00019359.2	2	3352.64	High	0	6.646e-05	5.36
	High	NHKEEMSQLTGQNSGDVNVEINVAPGK	1xOxidation [M6]	1.76792e-10	0	1	2	2	IPI00019359 IPI:IPI00019359.2	1	2911.39	High	0	7.10807e-07	7.27
	High	NHKEEMSQLTGQNSGDVNVEINVAPGK		9.67926e-06	0	1	2	1	IPI00019359 IPI:IPI00019359.2	1	2895.39	High	0	0.0001594	5.09
	High	EIETYHNLLEGGQEDFESSGAGK		7.877e-10	0	1	2	2	IPI00019359 IPI:IPI00019359.2	0	2510.13	High	0	1.496e-06	7.03
	High	SDLEMQYETLQEELMALKK	2xOxidation [M5; M15]	1.19039e-07	0	1	2	3	IPI00019359 IPI:IPI00019359.2	1	2331.11	High	0	1.813e-05	6.24
	High	SDLEMQYETLQEELMALK	2xOxidation [M5; M15]	5.66872e-07	0	1	2	3	IPI00019359 IPI:IPI00019359.2	0	2203.01	High	0	3.933e-05	5.1
	High	SDLEMQYETLQEELMALK	1xOxidation [M15]	0.000151103	0	1	2	1	IPI00019359 IPI:IPI00019359.2	0	2187.02	High	0	0.0005454	3.2
	High	SGGGGGGGLGSGGSIR		3.81596e-07	0	1	2	3	IPI00019359 IPI:IPI00019359.2	0	1232.6	High	0	3.239e-05	5.73
	High	HGVQELEIELQSQLSK		1.28552e-05	0	1	2	4	IPI00019359 IPI:IPI00019359.2	0	1837.97	High	0	0.0001831	4.75
	High	KDIENQYETQITQIEHEVSSSGQEVQSSAK		1.53042e-06	0	1	2	1	IPI00019359 IPI:IPI00019359.2	1	3392.61	High	0	6.463e-05	6.04
	High	GGSGGSYGGGGSGGGYGGGSGSR		1.3083e-06	0	1	2	1	IPI00019359 IPI:IPI00019359.2	0	1791.73	High	0	5.965e-05	4.75
	High	FSSSSGYGGGSSR		2.63275e-05	0	1	2	6	IPI00019359 IPI:IPI00019359.2	0	1235.53	High	0	0.0002572	3.65
	High	VQALEEANNDLENK		6.48425e-07	0	1	2	2	IPI00019359 IPI:IPI00019359.2	0	1586.77	High	0	4.217e-05	4.32
	High	GGGGSFGYSYGGGSGGGFSASSLGGGFGGGSR		0.000719562	0.000649755	1	2	2	IPI00019359 IPI:IPI00019359.2	0	2705.16	High	0.0004637	0.0009007	3.42
	High	HGVQELEIELQSQLSKK		0.000384268	0.000649755	1	2	1	IPI00019359 IPI:IPI00019359.2	1	1966.06	High	0.0004637	0.0007434	3.34
	High	QVLDNLTMEK	1xOxidation [M8]	0.00156546	0.000649755	1	2	3	IPI00019359 IPI:IPI00019359.2	0	1206.6	High	0.0008405	0.001303	3.13
	High	STMQELNSR	1xOxidation [M3]	0.00149677	0.000649755	1	2	7	IPI00019359 IPI:IPI00019359.2	0	1081.49	High	0.0009108	0.001725	2.96
	High	QVLDNLTMEK		0.00156546	0.000649755	1	2	1	IPI00019359 IPI:IPI00019359.2	0	1190.61	High	0.0004637	0.001185	2.87
	High	QGVDADINGLR		0.000525821	0.000649755	1	2	1	IPI00019359 IPI:IPI00019359.2	0	1157.59	High	0.0004637	0.0008169	3.61
	High	FSSSGGGGGGGR		0.001205	0.000649755	1	1	6	IPI00019359 IPI:IPI00019359.2	0	982.434	High	0.0009108	0.001997	2.8
	High	QEYEQLIAK		0.00375913	0.00106559	1	2	1	IPI00019359 IPI:IPI00019359.2	0	1121.58	High	0.0009108	0.00175	3.21
	High	NYSPYYNTIDDLKDQIVDLTVGNNK		0.00201887	0.00106559	1	2	1	IPI00019359 IPI:IPI00019359.2	1	2902.41	High	0.0008405	0.001317	3.22
	High	SDLEMQYETLQEELMALKK	1xOxidation [M]	0.00858842	0.00106559	1	2	3	IPI00019359 IPI:IPI00019359.2	1	2315.11	High	0.00103	0.003003	3.3
	High	MTLDDFR	1xOxidation [M1]	0.00814782	0.00106559	1	2	5	IPI00019359 IPI:IPI00019359.2	0	913.408	High	0.007929	0.05456	2.33
	High	YCGQLQMIQEQISNLEAQITDVR	1xCarbamidomethyl [C2]; 1xOxidation [M7]	0.00204931	0.00106559	1	2	1	IPI00019359 IPI:IPI00019359.2	0	2753.32	High	0.0008405	0.001325	2.53
	High	TLNDMRQEYEQLIAK	1xOxidation [M5]	0.0083338	0.00106559	1	2	1	IPI00019359 IPI:IPI00019359.2	1	1867.92	High	0.00103	0.002934	2.5
	High	IKFEMEQNLR		0.00193024	0.00106559	1	2	2	IPI00019359 IPI:IPI00019359.2	1	1307.68	High	0.00103	0.002716	2.66
	High	IKFEMEQNLR	1xOxidation [M5]	0.00300221	0.00106559	1	2	4	IPI00019359 IPI:IPI00019359.2	1	1323.67	High	0.0009108	0.001563	3.6
	High	LASYLDK		0.00680237	0.00106559	7	14	6	IPI00295684 IPI:IPI00295684.1; IPI00384444 IPI:IPI00384444.4; IPI00383111 IPI:IPI00383111.1; IPI00217963 IPI:IPI00217963.2; IPI00450768 IPI:IPI00450768.4; IPI00290077 IPI:IPI00290077.1; IPI00019359 IPI:IPI00019359.2	0	809.44	High	0.001955	0.0117	2.31
	High	FEMEQNLR	1xOxidation [M3]	0.0068537	0.00106559	1	2	2	IPI00019359 IPI:IPI00019359.2	0	1082.49	High	0.00103	0.002541	2.43
	High	KGPAAIQK		0.00411311	0.00106559	1	2	11	IPI00019359 IPI:IPI00019359.2	1	812.499	High	0.009573	0.06725	2.93
	High	SLEDTK		0.0142232	0.00132229	1	2	6	IPI00019359 IPI:IPI00019359.2	0	692.346	High	0.005278	0.02663	1.66
	High	IQDWYDK		0.0131913	0.00132229	1	2	1	IPI00019359 IPI:IPI00019359.2	0	967.452	High	0.001205	0.004402	2
	High	MTLDDFR		0.0122343	0.00132229	1	2	2	IPI00019359 IPI:IPI00019359.2	0	897.413	High	0.001205	0.004098	1.95
	High	IQDWYDKK		0.0166603	0.00191257	1	2	2	IPI00019359 IPI:IPI00019359.2	1	1095.55	High	0.001627	0.00559	2.59
	High	FEMEQNLR		0.0220107	0.00216078	1	2	1	IPI00019359 IPI:IPI00019359.2	0	1066.5	High	0.001783	0.007499	1.98
	High	LASYLDKVQALEEANNDLENK		0.0239088	0.00216078	1	2	2	IPI00019359 IPI:IPI00019359.2	1	2377.19	High	0.001783	0.008257	2.79
	High	NYSPYYNTIDDLK		0.0223443	0.00216078	1	2	1	IPI00019359 IPI:IPI00019359.2	0	1605.74	High	0.001783	0.00768	2.08
	High	EEMSQLTGQNSGDVNVEINVAPGK		0.0215195	0.00216078	1	2	1	IPI00019359 IPI:IPI00019359.2	0	2516.19	High	0.001783	0.007367	2.14
	High	VQALEEANNDLENKIQDWYDKK		0.0458575	0.0050128	1	2	1	IPI00019359 IPI:IPI00019359.2	2	2663.29	High	0.003872	0.01839	3.3
	High	LEKEIETYHNLLEGGQEDFESSGAGK		0.0560228	0.00576207	1	2	2	IPI00019359 IPI:IPI00019359.2	1	2880.35	High	0.004755	0.02377	3.08
	High	GPAAIQK		0.0572783	0.0063287	1	2	1	IPI00019359 IPI:IPI00019359.2	0	684.404	High	0.004998	0.02446	1.69
	High	QFSSSYLSR		0.0698593	0.0071867	1	2	1	IPI00019359 IPI:IPI00019359.2	0	1074.52	High	0.005782	0.03191	1.46
	High	TLLDIDNTR		0.0729927	0.00834875	1	2	2	IPI00019359 IPI:IPI00019359.2	0	1060.56	High	0.006477	0.03398	2.47
High	Master Protein	YHR174W	ENO2 SGDID:S000001217, Chr VIII from 451327-452640, Genome Release 64-2-1, Verified ORF, "Enolase II, a phosphopyruvate hydratase; catalyzes conversion of 2-phosphoglycerate to phosphoenolpyruvate during glycolysis and the reverse reaction during gluconeogenesis; expression induced in response to glucose; ENO2 has a paralog, ENO1, that arose from the whole genome duplication"	0	133.204	60	25	62	12	1	437	46.9	6	171.98	25
	Confidence	Sequence	Modifications	Qvality PEP	Qvality q-value	# Protein Groups	# Proteins	# PSMs	Master Protein Accessions	# Missed Cleavages	Theo. MH+ [Da]	Confidence (by Search Engine): Sequest HT	Percolator q-Value (by Search Engine): Sequest HT	Percolator PEP (by Search Engine): Sequest HT	XCorr (by Search Engine): Sequest HT
	High	SGETEDTFIADLVVGLR		0.000209876	0	2	2	3	YGR254W; YHR174W	0	1821.92	High	0	0.0006141	3.57
	High	DGKYDLDFKNPESDK		0.000208315	0	1	1	2	YHR174W	2	1770.82	High	0	0.000613	4.34
	High	NVPLYQHLADLSK		3.88193e-05	0	1	1	3	YHR174W	0	1497.81	High	0	0.0003076	2.85
	High	GVMNAVNNVNNVIAAAFVK	1xOxidation [M3]	9.48976e-07	0	1	1	3	YHR174W	0	1961.03	High	0	5.095e-05	4.85
	High	IGLDCASSEFFK	1xCarbamidomethyl [C5]	0.000123513	0	2	2	1	YGR254W; YHR174W	0	1373.64	High	0	0.000505	2.73
	High	LGANAILGVSMAAAR	1xOxidation [M11]	2.54295e-06	0	1	1	3	YHR174W	0	1430.78	High	0	8.289e-05	4.44
	High	SIVPSGASTGVHEALEMR		1.43094e-06	0	2	2	1	YGR254W; YHR174W	0	1840.92	High	0	6.234e-05	3.75
	High	YDLDFKNPESDK		0.000155685	0	1	1	1	YHR174W	1	1470.67	High	0	0.0005513	3.94
	High	AAQDSFAANWGVMVSHR		0.000134087	0	1	1	2	YHR174W	0	1846.87	High	0	0.0005208	3.29
	High	AAQDSFAANWGVMVSHR	1xOxidation [M13]	7.03936e-07	0	1	1	1	YHR174W	0	1862.86	High	0	4.393e-05	4.38
	High	WLTGVELADMYHSLMK	1xOxidation [M]	2.9891e-05	0	1	1	3	YHR174W	0	1909.92	High	0	0.000272	3.61
	High	VNQIGTLSESIK		8.69548e-05	0	2	2	3	YGR254W; YHR174W	0	1288.71	High	0	0.0004372	3.31
	High	AVDDFLLSLDGTANK		3.05009e-07	0	2	2	10	YGR254W; YHR174W	0	1578.8	High	0	2.895e-05	5.02
	High	SIVPSGASTGVHEALEMR	1xOxidation [M17]	5.38002e-07	0	2	2	2	YGR254W; YHR174W	0	1856.92	High	0	3.833e-05	3.82
	High	TAGIQIVADDLTVTNPAR		2.23978e-06	0	1	1	1	YHR174W	0	1854.99	High	0	7.784e-05	4.67
	High	GNPTVEVELTTEK		0.000318834	0.000649755	2	2	3	YGR254W; YHR174W	0	1416.72	High	0.0004637	0.0007031	3.64
	High	SIVPSGASTGVHEALEMRDEDK	1xOxidation [M17]	0.000948679	0.000649755	1	1	1	YHR174W	1	2344.11	High	0.0004637	0.0009853	3.54
	High	IGSEVYHNLK		0.000338459	0.000649755	2	2	3	YGR254W; YHR174W	0	1159.61	High	0.0004637	0.0007153	3.41
	High	AVYAGENFHHGDKL		0.000719562	0.000649755	1	1	2	YHR174W	1	1557.74	High	0.0008405	0.001323	2.78
	High	AVYAGENFHHGDK		0.000247347	0.000649755	1	1	1	YHR174W	0	1444.66	High	0.0004637	0.0006489	2.3
	High	AADALLLK		0.00925965	0.00106559	2	2	2	YGR254W; YHR174W	0	814.503	High	0.00103	0.003202	1.98
	High	WLTGVELADMYHSLMK	2xOxidation [M10; M15]	0.00252715	0.00106559	1	1	1	YHR174W	0	1925.91	High	0.0009108	0.001448	3
	High	WLTGVELADMYHSLMK		0.0102887	0.00106559	1	1	1	YHR174W	0	1893.92	High	0.00103	0.003499	2.55
	High	DGKYDLDFK		0.00925965	0.00106559	2	2	2	YGR254W; YHR174W	1	1100.53	High	0.006561	0.03605	2.84
	High	GVMNAVNNVNNVIAAAFVK		0.0259694	0.00216078	1	1	2	YHR174W	0	1945.03	High	0.00416	0.02037	3.07
	High	TFAEAMR		0.0226829	0.00216078	1	1	1	YHR174W	0	825.392	High	0.001783	0.007817	1.52
	High	IATAIEK		0.0218457	0.00216078	2	2	1	YGR254W; YHR174W	0	745.445	High	0.001783	0.007474	2.58
	High	LNQLLR		0.0353175	0.00335822	2	2	2	YGR254W; YHR174W	0	756.473	High	0.002654	0.01328	2.03
	High	KAADALLLK		0.042251	0.00466421	2	2	2	YGR254W; YHR174W	1	942.598	High	0.003615	0.01658	2.92
	High	LGANAILGVSMAAAR		0.0445127	0.0050128	1	1	2	YHR174W	0	1414.78	High	0.003872	0.01774	2.72
	High	ANLDVK		0.0862771	0.0093556	2	2	4	YGR254W; YHR174W	0	659.372	High	0.00867	0.06212	1.89
High	Master Protein	IPI00009867 IPI:IPI00009867.2	SWISS-PROT:P13647 TREMBL:Q6PI71|REFSEQ_NP:NP_000415|ENSEMBL:ENSP00000252242|H-INV:HIT000039811 Tax_Id=9606 Keratin, type II cytoskeletal 5	0	131.571	49	37	71	21	1	590	62.4	8.06	178.72	37
	Confidence	Sequence	Modifications	Qvality PEP	Qvality q-value	# Protein Groups	# Proteins	# PSMs	Master Protein Accessions	# Missed Cleavages	Theo. MH+ [Da]	Confidence (by Search Engine): Sequest HT	Percolator q-Value (by Search Engine): Sequest HT	Percolator PEP (by Search Engine): Sequest HT	XCorr (by Search Engine): Sequest HT
	High	NMQDLVEDFK	1xOxidation [M2]	0.000154527	0	1	1	2	IPI00009867 IPI:IPI00009867.2	0	1254.57	High	0	0.0005501	3.06
	High	NLDLDSIIAEVK		4.55297e-06	0	4	9	4	IPI00300725 IPI:IPI00300725.6; IPI00299145 IPI:IPI00299145.8; sp; IPI00009867 IPI:IPI00009867.2	0	1329.73	High	0	0.000136	3.76
	High	QNLEPLFEQYINNLR		1.51504e-05	0	3	6	2	IPI00300725 IPI:IPI00300725.6; IPI00299145 IPI:IPI00299145.8; IPI00009867 IPI:IPI00009867.2	0	1890.97	High	0.0004637	0.0006671	4.32
	High	LALDVEIATYR		7.26878e-05	0	4	11	7	IPI00300725 IPI:IPI00300725.6; IPI00299145 IPI:IPI00299145.8; sp; IPI00009867 IPI:IPI00009867.2	0	1263.69	High	0	0.0004051	3.37
	High	LAELEEALQK		3.47058e-05	0	1	1	2	IPI00009867 IPI:IPI00009867.2	0	1143.63	High	0	0.0002921	3.37
	High	VDALMDEINFMK	2xOxidation [M5; M11]	3.12607e-05	0	1	1	2	IPI00009867 IPI:IPI00009867.2	0	1457.67	High	0	0.0002783	3.73
	High	VSLAGACGVGGYGSR	1xCarbamidomethyl [C7]	2.51185e-07	0	1	1	1	IPI00009867 IPI:IPI00009867.2	0	1410.68	High	0	2.626e-05	4.01
	High	SRTEAESWYQTK		0.001205	0.000649755	1	1	2	IPI00009867 IPI:IPI00009867.2	1	1485.7	High	0.0004637	0.001075	3.74
	High	SFSTASAITPSVSR		0.000537734	0.000649755	1	1	1	IPI00009867 IPI:IPI00009867.2	0	1410.72	High	0.0004637	0.0008214	3.29
	High	SGGGGGGGFGR		0.00028293	0.000649755	1	1	2	IPI00009867 IPI:IPI00009867.2	0	865.391	High	0.0004637	0.000689	3.2
	High	WTLLQEQGTK		0.000984795	0.000649755	3	6	1	IPI00300725 IPI:IPI00300725.6; IPI00299145 IPI:IPI00299145.8; IPI00009867 IPI:IPI00009867.2	0	1203.64	High	0.0004637	0.001	2.75
	High	YEELQQTAGR		0.000491643	0.000649755	1	1	1	IPI00009867 IPI:IPI00009867.2	0	1194.57	High	0.0004637	0.0008007	2.83
	High	TTAENEFVMLKK	1xOxidation [M9]	0.000514172	0.000649755	1	1	1	IPI00009867 IPI:IPI00009867.2	1	1426.72	High	0.0004637	0.0008114	3.18
	High	TTAENEFVMLK	1xOxidation [M9]	0.000348721	0.000649755	1	1	2	IPI00009867 IPI:IPI00009867.2	0	1298.63	High	0.0004637	0.0007222	2.76
	High	DVDAAYMNK		0.00129854	0.000649755	4	8	1	IPI00300725 IPI:IPI00300725.6; IPI00299145 IPI:IPI00299145.8; IPI00009867 IPI:IPI00009867.2; IPI00103481 IPI:IPI00103481.1	0	1026.46	High	0.0004637	0.001103	2.9
	High	DVDAAYMNKVELEAK		0.000941616	0.000649755	1	2	1	IPI00009867 IPI:IPI00009867.2	1	1695.83	High	0.0004637	0.0009848	2.74
	High	NTKHEISEMNR		0.00179109	0.00106559	1	1	1	IPI00009867 IPI:IPI00009867.2	1	1358.65	High	0.0008405	0.001254	3.06
	High	QLDSIVGER		0.00722405	0.00106559	3	6	1	IPI00300725 IPI:IPI00300725.6; IPI00299145 IPI:IPI00299145.8; IPI00009867 IPI:IPI00009867.2	0	1016.54	High	0.00103	0.002638	2.37
	High	LRAEIDNVKK		0.00675143	0.00106559	1	1	1	IPI00009867 IPI:IPI00009867.2	2	1185.69	High	0.0009108	0.002507	3.49
	High	NKYEDEINKR		0.00187332	0.00106559	4	10	6	IPI00300725 IPI:IPI00300725.6; IPI00299145 IPI:IPI00299145.8; IPI00009867 IPI:IPI00009867.2; IPI00556624 IPI:IPI00556624.1	2	1308.65	High	0.0008405	0.001275	3.55
	High	SLYNLGGSK		0.00381593	0.00106559	1	1	1	IPI00009867 IPI:IPI00009867.2	0	938.494	High	0.0009108	0.001765	2.53
	High	TTAENEFVMLK		0.00433486	0.00106559	1	1	1	IPI00009867 IPI:IPI00009867.2	0	1282.63	High	0.0009108	0.001887	2.22
	High	AQYEEIANR		0.00485132	0.00106559	1	1	1	IPI00009867 IPI:IPI00009867.2	0	1093.53	High	0.0009108	0.00202	2.82
	High	TEAESWYQTK		0.00716994	0.00106559	1	1	2	IPI00009867 IPI:IPI00009867.2	0	1242.56	High	0.00103	0.002614	1.82
	High	KLLEGEECR	1xCarbamidomethyl [C8]	0.00359378	0.00106559	5	12	1	IPI00174775 IPI:IPI00174775.1; IPI00300725 IPI:IPI00300725.6; IPI00299145 IPI:IPI00299145.8; sp; IPI00009867 IPI:IPI00009867.2	1	1133.56	High	0.0009108	0.001712	3.58
	High	EYQELMNTK	1xOxidation [M6]	0.00203404	0.00106559	1	1	2	IPI00009867 IPI:IPI00009867.2	0	1171.53	High	0.0009108	0.001848	2.45
	High	LALDVEIATYRK		0.00477904	0.00106559	4	11	1	IPI00300725 IPI:IPI00300725.6; IPI00299145 IPI:IPI00299145.8; sp; IPI00009867 IPI:IPI00009867.2	1	1391.79	High	0.0009108	0.002002	2.8
	High	NKYEDEINK		0.0136975	0.00132229	4	11	1	IPI00300725 IPI:IPI00300725.6; IPI00299145 IPI:IPI00299145.8; IPI00009867 IPI:IPI00009867.2; IPI00556624 IPI:IPI00556624.1	1	1152.55	High	0.001205	0.004559	2.59
	High	YEDEINK		0.0121425	0.00132229	6	16	1	IPI00300725 IPI:IPI00300725.6; IPI00299145 IPI:IPI00299145.8; sp; IPI00009867 IPI:IPI00009867.2; IPI00376379 IPI:IPI00376379.1; IPI00556624 IPI:IPI00556624.1	0	910.415	High	0.001205	0.004075	1.4
	High	LLEGEECR	1xCarbamidomethyl [C7]	0.0153358	0.00162885	6	13	1	IPI00174775 IPI:IPI00174775.1; IPI00300725 IPI:IPI00300725.6; IPI00299145 IPI:IPI00299145.8; sp; IPI00009867 IPI:IPI00009867.2; IPI00166205 IPI:IPI00166205.2	0	1005.47	High	0.001424	0.005102	2.03
	High	VDALMDEINFMK	1xOxidation [M]	0.0187932	0.00210976	1	1	2	IPI00009867 IPI:IPI00009867.2	0	1441.67	High	0.001783	0.009908	2.01
	High	FASFIDK		0.0201104	0.00210976	8	22	3	IPI00174775 IPI:IPI00174775.1; IPI00300725 IPI:IPI00300725.6; IPI00299145 IPI:IPI00299145.8; sp; IPI00009867 IPI:IPI00009867.2; IPI00061200 IPI:IPI00061200.1; IPI00103481 IPI:IPI00103481.1; IPI00376379 IPI:IPI00376379.1	0	827.43	High	0.001783	0.00956	2.57
	High	DVDAAYMNK	1xOxidation [M7]	0.0199597	0.00210976	4	8	2	IPI00300725 IPI:IPI00300725.6; IPI00299145 IPI:IPI00299145.8; IPI00009867 IPI:IPI00009867.2; IPI00103481 IPI:IPI00103481.1	0	1042.45	High	0.001783	0.01078	1.73
	High	QSSVSFR		0.0335146	0.00314891	1	1	1	IPI00009867 IPI:IPI00009867.2	0	810.41	High	0.002508	0.01242	2.14
	High	YEDEINKR		0.0353175	0.00335822	6	15	2	IPI00300725 IPI:IPI00300725.6; IPI00299145 IPI:IPI00299145.8; sp; IPI00009867 IPI:IPI00009867.2; IPI00376379 IPI:IPI00376379.1; IPI00556624 IPI:IPI00556624.1	1	1066.52	High	0.002654	0.01318	2.13
	High	FASFIDKVR		0.0374948	0.00354048	8	21	1	IPI00174775 IPI:IPI00174775.1; IPI00300725 IPI:IPI00300725.6; IPI00299145 IPI:IPI00299145.8; sp; IPI00009867 IPI:IPI00009867.2; IPI00061200 IPI:IPI00061200.1; IPI00103481 IPI:IPI00103481.1; IPI00376379 IPI:IPI00376379.1	1	1082.6	High	0.00279	0.01425	2.39
	High	TTAENEFVMLKK		0.0458575	0.0050128	1	1	1	IPI00009867 IPI:IPI00009867.2	1	1410.73	High	0.003872	0.01839	2.51
	High	QNLEPLFEQYINNLRR		0.0497626	0.00540776	3	6	1	IPI00300725 IPI:IPI00300725.6; IPI00299145 IPI:IPI00299145.8; IPI00009867 IPI:IPI00009867.2	1	2047.07	High	0.00416	0.02032	2.66
	High	EYQELMNTK		0.053989	0.00576207	1	1	1	IPI00009867 IPI:IPI00009867.2	0	1155.54	High	0.00459	0.02256	2
	High	GLGVGFGSGGGSSSSVK		0.0719337	0.00821951	1	1	1	IPI00009867 IPI:IPI00009867.2	0	1439.71	High	0.006391	0.03326	1.55
	High	DVDAAYMNKVELEAK	1xOxidation [M7]	0.0875336	0.00951819	1	2	1	IPI00009867 IPI:IPI00009867.2	1	1711.82	High	0.007328	0.04362	2.23
	High	AEIDNVKK		0.090098	0.00964334	1	1	1	IPI00009867 IPI:IPI00009867.2	1	916.51	High	0.007424	0.04545	1.71
	High	TSFTSVSR		0.0907499	0.00964334	1	1	1	IPI00009867 IPI:IPI00009867.2	0	884.447	High	0.007424	0.04596	1.81
High	Master Protein	sp	ALBU_HUMAN	0	129.01	64	37	52	37	1	609	69.3	6.28	136.21	37
	Confidence	Sequence	Modifications	Qvality PEP	Qvality q-value	# Protein Groups	# Proteins	# PSMs	Master Protein Accessions	# Missed Cleavages	Theo. MH+ [Da]	Confidence (by Search Engine): Sequest HT	Percolator q-Value (by Search Engine): Sequest HT	Percolator PEP (by Search Engine): Sequest HT	XCorr (by Search Engine): Sequest HT
	High	SHCIAEVENDEMPADLPSLAADFVESK	1xCarbamidomethyl [C3]; 1xOxidation [M12]	3.4116e-07	0	1	1	2	sp	0	2990.34	High	0	3.065e-05	5.6
	High	RPCFSALEVDETYVPK	1xCarbamidomethyl [C3]	4.1829e-05	0	1	1	1	sp	0	1910.93	High	0	0.0003173	4.41
	High	RHPYFYAPELLFFAK		3.20532e-06	0	1	1	1	sp	1	1899	High	0	9.285e-05	3.91
	High	DVFLGMFLYEYAR	1xOxidation [M6]	5.32597e-06	0	1	1	1	sp	0	1639.78	High	0	0.0001195	2.85
	High	VFDEFKPLVEEPQNLIK		1.32157e-07	0	1	1	1	sp	0	2045.1	High	0	1.907e-05	5.3
	High	AAFTECCQAADK	2xCarbamidomethyl [C6; C7]	1.60831e-05	0	1	1	1	sp	0	1371.57	High	0	0.0002037	3.65
	High	VHTECCHGDLLECADDR	3xCarbamidomethyl [C5; C6; C13]	8.13379e-08	0	1	1	2	sp	0	2086.84	High	0	1.499e-05	4.53
	High	AVMDDFAAFVEK	1xOxidation [M3]	2.46811e-06	0	1	1	2	sp	0	1358.63	High	0	8.19e-05	3.39
	High	AVMDDFAAFVEK		7.26878e-05	0	1	1	1	sp	0	1342.63	High	0	0.0004051	2.64
	High	TCVADESAENCDK	2xCarbamidomethyl [C2; C11]	2.67236e-05	0	1	1	1	sp	0	1498.58	High	0	0.0002589	2.98
	High	CCAAADPHECYAK	3xCarbamidomethyl [C1; C2; C10]	1.98232e-05	0	1	1	1	sp	0	1552.6	High	0	0.0002246	2.91
	High	KVPQVSTPTLVEVSR		0.000293693	0.000649755	1	2	1	sp	1	1639.94	High	0.0004637	0.0006854	4.04
	High	VPQVSTPTLVEVSR		0.000473625	0.000649755	1	2	2	sp	0	1511.84	High	0.0004637	0.0007909	2.94
	High	RHPDYSVVLLLR		0.000977463	0.000649755	1	1	2	sp	1	1467.84	High	0.0004637	0.0009979	3.44
	High	HPYFYAPELLFFAK		0.000886979	0.000649755	1	1	1	sp	0	1742.89	High	0.0004637	0.0009647	2.87
	High	LVRPEVDVMCTAFHDNEETFLK	1xCarbamidomethyl [C10]	0.000423439	0.000649755	1	1	1	sp	0	2650.26	High	0.0004637	0.0007651	3.07
	High	LVRPEVDVMCTAFHDNEETFLK	1xCarbamidomethyl [C10]; 1xOxidation [M9]	0.00121404	0.000649755	1	1	1	sp	0	2666.26	High	0.0004637	0.001076	3.31
	High	LVRPEVDVMCTAFHDNEETFLKK	1xCarbamidomethyl [C10]	0.00142043	0.000649755	1	1	1	sp	1	2778.36	High	0.0004637	0.001143	3.38
	High	QNCELFEQLGEYK	1xCarbamidomethyl [C3]	0.000247347	0.000649755	1	1	2	sp	0	1657.75	High	0.0004637	0.0006484	3.74
	High	FKDLGEENFK		0.00107719	0.000649755	1	1	2	sp	1	1226.61	High	0.0004637	0.001032	3.87
	High	ADDKETCFAEEGK	1xCarbamidomethyl [C7]	0.00125089	0.000649755	1	1	1	sp	1	1499.63	High	0.0004637	0.001088	3.4
	High	QTALVELVK		0.00925965	0.00106559	1	1	1	sp	0	1000.6	High	0.00103	0.003199	1.81
	High	ECCEKPLLEK	2xCarbamidomethyl [C2; C3]	0.00755746	0.00106559	1	1	1	sp	0	1305.62	High	0.00103	0.002725	1.77
	High	VHTECCHGDLLECADDRADLAK	3xCarbamidomethyl [C5; C6; C13]	0.00270334	0.00106559	1	1	1	sp	1	2585.12	High	0.0009108	0.001492	2.35
	High	TYETTLEK		0.00665069	0.00106559	1	1	1	sp	0	984.488	High	0.0009108	0.002476	1.68
	High	AEFAEVSK		0.00925965	0.00106559	1	1	1	sp	0	880.441	High	0.00103	0.003205	2.56
	High	SLHTLFGDK		0.0055952	0.00106559	1	1	2	sp	0	1017.54	High	0.0009108	0.002206	2.62
	High	FQNALLVR		0.0107642	0.00106559	1	1	1	sp	0	960.563	High	0.00103	0.003643	1.91
	High	KQTALVELVK		0.00378742	0.00106559	1	1	2	sp	1	1128.7	High	0.004311	0.0213	3.09
	High	LCTVATLR	1xCarbamidomethyl [C2]	0.00716994	0.00106559	1	1	1	sp	0	933.519	High	0.00103	0.002625	1.99
	High	HPDYSVVLLLR		0.00607719	0.00106559	1	1	1	sp	0	1311.74	High	0.0009108	0.002326	2.99
	High	DDNPNLPR		0.0123267	0.00132229	1	1	2	sp	0	940.448	High	0.001205	0.00412	2
	High	LVTDLTK		0.0122343	0.00132229	1	2	1	sp	0	789.472	High	0.001205	0.00409	2.2
	High	AACLLPK	1xCarbamidomethyl [C3]	0.0183736	0.00210976	1	1	2	sp	0	772.439	High	0.001767	0.006157	2.24
	High	RMPCAEDYLSVVLNQLCVLHEK	2xCarbamidomethyl [C4; C17]; 1xOxidation [M2]	0.0221768	0.00216078	1	1	1	sp	1	2690.31	High	0.001783	0.007588	2.64
	High	CCTESLVNR	2xCarbamidomethyl [C1; C2]	0.0410094	0.00422195	1	2	1	sp	0	1138.5	High	0.003294	0.01589	1.3
	High	LVNEVTEFAK		0.0479491	0.0050128	1	1	1	sp	0	1149.62	High	0.003872	0.01952	1.7
	High	NECFLQHKDDNPNLPR	1xCarbamidomethyl [C3]	0.0708893	0.00781134	1	1	1	sp	1	1996.93	High	0.006245	0.03269	2.73
	High	YICENQDSISSK	1xCarbamidomethyl [C3]	0.0790857	0.00846887	1	1	3	sp	0	1443.64	High	0.006561	0.03772	1.9
High	Master Protein	YLR197W	NOP56 SGDID:S000004187, Chr XII from 546097-547611, Genome Release 64-2-1, Verified ORF, "Essential evolutionarily-conserved nucleolar protein; component of the box C/D snoRNP complexes that direct 2'-O-methylation of pre-rRNA during its maturation; overexpression causes spindle orientation defects"	0	126.759	64	29	48	28	1	504	56.8	8.9	139.95	29
	Confidence	Sequence	Modifications	Qvality PEP	Qvality q-value	# Protein Groups	# Proteins	# PSMs	Master Protein Accessions	# Missed Cleavages	Theo. MH+ [Da]	Confidence (by Search Engine): Sequest HT	Percolator q-Value (by Search Engine): Sequest HT	Percolator PEP (by Search Engine): Sequest HT	XCorr (by Search Engine): Sequest HT
	High	MHTVAPNLSELIGEVIGAR	1xOxidation [M1]	1.15232e-06	0	1	1	1	YLR197W	0	2023.06	High	0	5.602e-05	4.83
	High	MHTVAPNLSELIGEVIGAR		1.12384e-05	0	1	1	1	YLR197W	0	2007.07	High	0	0.0001716	3.65
	High	NELAIQEAMELYNK	1xOxidation [M9]	3.95073e-06	0	1	1	2	YLR197W	0	1681.81	High	0	0.0001032	4.61
	High	NELAIQEAMELYNK		1.75059e-06	0	1	1	2	YLR197W	0	1665.82	High	0	6.89e-05	4.3
	High	ISMGQDISETDMENVCVFAQR	1xCarbamidomethyl [C16]; 2xOxidation [M3; M12]	4.32109e-06	0	1	1	1	YLR197W	0	2462.06	High	0	0.0001078	4.81
	High	DKPAAEVEETK		0.000108789	0	1	1	1	YLR197W	0	1216.61	High	0	0.0004802	4.06
	High	DKPAAEVEETKEK		5.47302e-05	0	1	1	1	YLR197W	1	1473.74	High	0	0.0003581	3.79
	High	DKASLNDDSLHDLAALLNEDSGIAQR		1.42404e-07	0	1	1	2	YLR197W	1	2781.36	High	0	0.0001135	5.44
	High	QAASTVQILGAEK		5.47302e-05	0	1	1	1	YLR197W	0	1315.72	High	0	0.0003586	4.07
	High	GAAEALENANDISEGLVSESLK		4.24584e-05	0	1	1	1	YLR197W	0	2217.09	High	0	0.0003204	3.29
	High	LIELVSFAPFK		6.30731e-05	0	1	1	2	YLR197W	0	1263.73	High	0	0.0003811	3.11
	High	EVQEQINDFGAFTK		7.60185e-05	0	1	1	2	YLR197W	0	1625.78	High	0	0.0004134	3.47
	High	EWYGWHFPELAK		0.000161607	0	2	2	1	YOR310C; YLR197W	0	1562.74	High	0	0.0005596	2.99
	High	IDNYSEEPSNVFGSVLK		5.95723e-06	0	1	1	2	YLR197W	0	1897.92	High	0	0.0001262	4
	High	LEFYNTGKPTLK		5.59701e-05	0	1	1	2	YLR197W	0	1410.76	High	0	0.0003623	3.43
	High	VKEWYGWHFPELAK		1.11009e-06	0	1	1	2	YLR197W	1	1789.91	High	0	5.495e-05	5.15
	High	IDNYSEEPSNVFGSVLKK		0.000941616	0.000649755	1	1	1	YLR197W	1	2026.01	High	0.0004637	0.0009846	3.51
	High	ASLNDDSLHDLAALLNEDSGIAQR		0.00023651	0.000649755	1	1	2	YLR197W	0	2538.24	High	0.0004637	0.0006392	3.69
	High	AQLGLGHAYSR		0.000433031	0.000649755	1	1	2	YLR197W	0	1172.62	High	0.0004637	0.0007692	2.91
	High	QLYDYLCEK	1xCarbamidomethyl [C7]	0.00206471	0.00106559	1	1	1	YLR197W	0	1231.57	High	0.0008405	0.00133	2.61
	High	NITLAISDK		0.00645372	0.00106559	1	1	1	YLR197W	0	974.552	High	0.0009108	0.002428	2.12
	High	AILDLNLPK		0.00346158	0.00106559	1	1	3	YLR197W	0	996.609	High	0.001424	0.005154	2.64
	High	YGLIYHSGFISK		0.00547054	0.00106559	1	1	2	YLR197W	0	1384.73	High	0.0009108	0.002172	2.99
	High	KLEDDDEEK		0.00750084	0.00106559	1	1	1	YLR197W	1	1120.5	High	0.00103	0.002705	2.63
	High	NDNHIIQAIALLDQLDK		0.0133915	0.00132229	1	1	1	YLR197W	0	1934.03	High	0.001205	0.004469	2.76
	High	VIDNAR		0.0124199	0.00132229	1	1	3	YLR197W	0	687.378	High	0.001205	0.004175	1.72
	High	VASLADYR		0.014439	0.00132229	1	1	1	YLR197W	0	894.468	High	0.001205	0.004807	1.98
	High	GLQSGDLER		0.017562	0.00210976	1	1	3	YLR197W	0	974.49	High	0.001767	0.005896	1.8
	High	LVPDNYTFAK		0.0279948	0.00216078	1	1	1	YLR197W	0	1167.6	High	0.001783	0.009929	1.77
	High	LKEVQEQINDFGAFTK		0.0350542	0.00335822	1	1	1	YLR197W	1	1866.96	High	0.002654	0.01316	3.35
	High	LISHAGSLTNLSK		0.0392136	0.00377955	1	1	1	YLR197W	0	1340.75	High	0.002962	0.0151	2.35
High	Master Protein	IPI00383111 IPI:IPI00383111.1	TREMBL:Q14664 Tax_Id=9606 Keratin 10	0	121.842	48	26	123	1	1	561	57.2	5.07	352.69	26
	Confidence	Sequence	Modifications	Qvality PEP	Qvality q-value	# Protein Groups	# Proteins	# PSMs	Master Protein Accessions	# Missed Cleavages	Theo. MH+ [Da]	Confidence (by Search Engine): Sequest HT	Percolator q-Value (by Search Engine): Sequest HT	Percolator PEP (by Search Engine): Sequest HT	XCorr (by Search Engine): Sequest HT
	High	ELTTEIDNNIEQISSYK		2.88836e-09	0	2	3	10	IPI00295684 IPI:IPI00295684.1; IPI00383111 IPI:IPI00383111.1	0	1996.97	High	0	2.854e-06	5.78
	High	SLLEGEGSSGGGGR		1.733e-05	0	2	3	2	IPI00295684 IPI:IPI00295684.1; IPI00383111 IPI:IPI00383111.1	0	1262.6	High	0	0.0002106	2.8
	High	SKELTTEIDNNIEQISSYK		3.85468e-08	0	2	3	4	IPI00295684 IPI:IPI00295684.1; IPI00383111 IPI:IPI00383111.1	1	2212.1	High	0	1.033e-05	6.35
	High	NVSTGDVNVEMNAAPGVDLTQLLNNMR	2xOxidation [M11; M26]	7.75698e-07	0	2	3	4	IPI00295684 IPI:IPI00295684.1; IPI00383111 IPI:IPI00383111.1	0	2904.38	High	0	4.596e-05	5.28
	High	NVSTGDVNVEMNAAPGVDLTQLLNNMR	1xOxidation [M]	4.68066e-08	0	2	3	2	IPI00295684 IPI:IPI00295684.1; IPI00383111 IPI:IPI00383111.1	0	2888.39	High	0	1.137e-05	4.93
	High	NVQALEIELQSQLALK		2.7066e-07	0	2	3	10	IPI00295684 IPI:IPI00295684.1; IPI00383111 IPI:IPI00383111.1	0	1797.01	High	0	3.527e-05	5.6
	High	QSVEADINGLR		0.000153377	0	2	6	2	IPI00295684 IPI:IPI00295684.1; IPI00383111 IPI:IPI00383111.1	0	1201.62	High	0	0.0005492	3.31
	High	RNVQALEIELQSQLALK		5.47534e-08	0	2	3	2	IPI00295684 IPI:IPI00295684.1; IPI00383111 IPI:IPI00383111.1	1	1953.11	High	0	1.233e-05	6.91
	High	QSLEASLAETEGR		5.7238e-05	0	2	3	6	IPI00295684 IPI:IPI00295684.1; IPI00383111 IPI:IPI00383111.1	0	1390.68	High	0	0.0003654	3.76
	High	KDAEAWFNEK		0.000187638	0	2	3	2	IPI00295684 IPI:IPI00295684.1; IPI00383111 IPI:IPI00383111.1	1	1237.58	High	0	0.0005909	4.24
	High	GSSGGGCFGGSSGGYGGLGGFGGGSFR	1xCarbamidomethyl [C7]	5.19428e-05	0	2	2	1	IPI00295684 IPI:IPI00295684.1; IPI00383111 IPI:IPI00383111.1	0	2342.98	High	0	0.0003507	3.74
	High	GSLGGGFSSGGFSGGSFSR		2.40811e-08	0	2	3	6	IPI00295684 IPI:IPI00295684.1; IPI00383111 IPI:IPI00383111.1	0	1707.77	High	0	8.198e-06	4.28
	High	YCVQLSQIQAQISALEEQLQEIR	1xCarbamidomethyl [C2]	4.5191e-06	0	1	1	1	IPI00383111 IPI:IPI00383111.1	0	2747.4	High	0	0.0001102	4.64
	High	ALEESNYELEGK		1.45952e-05	0	2	3	5	IPI00295684 IPI:IPI00295684.1; IPI00383111 IPI:IPI00383111.1	0	1381.65	High	0	0.0001946	3.93
	High	ALEESNYELEGKIK		0.000183481	0	2	3	1	IPI00295684 IPI:IPI00295684.1; IPI00383111 IPI:IPI00383111.1	1	1622.83	High	0	0.0005854	3.37
	High	VTMQNLNDR	1xOxidation [M3]	0.000361986	0.000649755	6	8	20	IPI00295684 IPI:IPI00295684.1; IPI00384444 IPI:IPI00384444.4; IPI00328103 IPI:IPI00328103.1; IPI00383111 IPI:IPI00383111.1; IPI00375911 IPI:IPI00375911.1; IPI00217963 IPI:IPI00217963.2	0	1106.53	High	0.0004637	0.001192	2.91
	High	VTMQNLNDR		0.00151932	0.000649755	6	8	3	IPI00295684 IPI:IPI00295684.1; IPI00384444 IPI:IPI00384444.4; IPI00328103 IPI:IPI00328103.1; IPI00383111 IPI:IPI00383111.1; IPI00375911 IPI:IPI00375911.1; IPI00217963 IPI:IPI00217963.2	0	1090.53	High	0.0004637	0.001173	2.6
	High	LENEIQTYR		0.000829298	0.000649755	2	3	4	IPI00295684 IPI:IPI00295684.1; IPI00383111 IPI:IPI00383111.1	0	1165.58	High	0.0009108	0.002485	3.16
	High	NQILNLTTDNANILLQIDNAR		0.000525821	0.000649755	2	3	3	IPI00295684 IPI:IPI00295684.1; IPI00383111 IPI:IPI00383111.1	0	2367.26	High	0.0004637	0.0008168	3.46
	High	DAEAWFNEK		0.00176449	0.000649755	4	5	11	IPI00295684 IPI:IPI00295684.1; IPI00328103 IPI:IPI00328103.1; IPI00383111 IPI:IPI00383111.1; IPI00375911 IPI:IPI00375911.1	0	1109.49	High	0.0004637	0.001244	2.98
	High	SEITELR		0.0103665	0.00106559	2	3	2	IPI00295684 IPI:IPI00295684.1; IPI00383111 IPI:IPI00383111.1	0	847.452	High	0.00103	0.003533	1.97
	High	QSVEADINGLRR		0.0112616	0.00106559	2	6	2	IPI00295684 IPI:IPI00295684.1; IPI00383111 IPI:IPI00383111.1	1	1357.72	High	0.00103	0.003798	2.01
	High	LKYENEVALR		0.00356694	0.00106559	2	3	5	IPI00295684 IPI:IPI00295684.1; IPI00383111 IPI:IPI00383111.1	1	1234.68	High	0.0009108	0.00179	3.77
	High	LAADDFR		0.00784707	0.00106559	7	27	5	IPI00295684 IPI:IPI00295684.1; IPI00384444 IPI:IPI00384444.4; IPI00383111 IPI:IPI00383111.1; sp; IPI00217963 IPI:IPI00217963.2; IPI00450768 IPI:IPI00450768.4; IPI00290077 IPI:IPI00290077.1	0	807.4	High	0.00416	0.02124	2.21
	High	LASYLDK		0.00680237	0.00106559	7	14	6	IPI00295684 IPI:IPI00295684.1; IPI00384444 IPI:IPI00384444.4; IPI00383111 IPI:IPI00383111.1; IPI00217963 IPI:IPI00217963.2; IPI00450768 IPI:IPI00450768.4; IPI00290077 IPI:IPI00290077.1; IPI00019359 IPI:IPI00019359.2	0	809.44	High	0.001955	0.0117	2.31
	High	IRLENEIQTYR		0.0345334	0.00335822	2	3	2	IPI00295684 IPI:IPI00295684.1; IPI00383111 IPI:IPI00383111.1	1	1434.77	High	0.00416	0.02063	3.2
	High	LASYLDKVR		0.0416257	0.00466421	6	11	1	IPI00295684 IPI:IPI00295684.1; IPI00384444 IPI:IPI00384444.4; IPI00383111 IPI:IPI00383111.1; IPI00217963 IPI:IPI00217963.2; IPI00450768 IPI:IPI00450768.4; IPI00290077 IPI:IPI00290077.1	1	1064.61	High	0.003615	0.01631	2.06
	High	ELTTEIDNNIEQISSYKSEITELRR		0.0740665	0.00834875	2	3	1	IPI00295684 IPI:IPI00295684.1; IPI00383111 IPI:IPI00383111.1	2	2981.51	High	0.006477	0.03468	3.8
High	Master Protein	YLL048C	YBT1 SGDID:S000003971, Chr XII from 46265-41280, Genome Release 64-2-1, reverse complement, Verified ORF, "Transporter of the ATP-binding cassette (ABC) family; involved in bile acid transport; negative regulator of vacuole fusion; regulates release of lumenal Ca2+ stores; similar to mammalian bile transporters; YBT1 has a paralog, VMR1, that arose from the whole genome duplication"	0	116.296	21	34	51	34	1	1661	189	8.09	119.05	34
	Confidence	Sequence	Modifications	Qvality PEP	Qvality q-value	# Protein Groups	# Proteins	# PSMs	Master Protein Accessions	# Missed Cleavages	Theo. MH+ [Da]	Confidence (by Search Engine): Sequest HT	Percolator q-Value (by Search Engine): Sequest HT	Percolator PEP (by Search Engine): Sequest HT	XCorr (by Search Engine): Sequest HT
	High	EFQGSTILTIAHR		4.92974e-05	0	1	1	2	YLL048C	0	1472.79	High	0	0.0003417	3.22
	High	LYSEVEMNMNSVER	2xOxidation [M7; M9]	1.68644e-06	0	1	1	1	YLL048C	0	1732.75	High	0	6.781e-05	3.53
	High	SITIIPQDPTLFSGTIK		0.000222796	0	1	1	2	YLL048C	0	1831.02	High	0	0.0006267	3.17
	High	EYMEIEQEPYNEHK	1xOxidation [M3]	3.89216e-06	0	1	1	1	YLL048C	0	1854.79	High	0	0.0001024	3.89
	High	IDNIDISGVDLQR		4.83325e-06	0	1	1	2	YLL048C	0	1457.76	High	0	0.0001136	4.18
	High	TILNFVAGINASR		4.72618e-06	0	1	1	2	YLL048C	0	1375.77	High	0.0004637	0.000676	3.7
	High	TNLDPYDEFSDR		2.77403e-05	0	1	1	1	YLL048C	0	1471.63	High	0	0.0002629	3.48
	High	VKEYMEIEQEPYNEHK	1xOxidation [M5]	5.78192e-06	0	1	1	2	YLL048C	1	2081.95	High	0	0.0001243	4.27
	High	SPIYQHFSETLVGVTTIR		1.88136e-05	0	1	1	1	YLL048C	0	2048.08	High	0	0.0002196	4.34
	High	KEFQGSTILTIAHR		0.000823125	0.000649755	1	1	1	YLL048C	1	1600.88	High	0.0004637	0.000941	3.76
	High	FLEPETGHIK		0.00140985	0.000649755	1	1	1	YLL048C	0	1170.62	High	0.0004637	0.001141	2.46
	High	STIITALFR		0.00276476	0.00106559	1	2	1	YLL048C	0	1021.6	High	0.0009108	0.001508	2.33
	High	FMQENLHK	1xOxidation [M2]	0.010059	0.00106559	1	1	1	YLL048C	0	1062.5	High	0.00103	0.003432	2.62
	High	FFDATPTGR		0.00209584	0.00106559	1	1	1	YLL048C	0	1011.49	High	0.0008405	0.001337	1.96
	High	KIFNMILNK	1xOxidation [M5]	0.00245259	0.00106559	1	1	2	YLL048C	1	1136.65	High	0.0009108	0.001431	3.27
	High	IILLDEATASIDYSSDAK		0.00408237	0.00106559	1	1	3	YLL048C	0	1924.97	High	0.006477	0.03345	2.24
	High	ETSNEASSTNSENVNK	2xPhospho [T9(80); S11(98.3)]	0.0109275	0.00106559	1	1	2	YLL048C	0	1870.67	High	0.00103	0.003693	2.48
	High	IEVNDLSLR		0.00750084	0.00106559	1	1	1	YLL048C	0	1058.58	High	0.00103	0.002708	2.13
	High	EYDHPYSLLLNK		0.00373105	0.00106559	1	1	1	YLL048C	0	1491.75	High	0.0009108	0.001742	2.11
	High	IFNMILNK		0.00430246	0.00106559	1	1	2	YLL048C	0	992.56	High	0.0009108	0.001936	2.32
	High	IIVMDAGEVK	1xOxidation [M4]	0.00284884	0.00106559	1	2	2	YLL048C	0	1090.58	High	0.0009108	0.001527	2.28
	High	IIVMDAGEVK		0.00417528	0.00106559	1	2	2	YLL048C	0	1074.59	High	0.0009108	0.001852	1.98
	High	VNLISEEQLQQGATR		0.0143307	0.00132229	1	1	2	YLL048C	0	1685.88	High	0.001205	0.0049	2.97
	High	IDENNKPFFYLWVANR		0.0159243	0.00191257	1	1	1	YLL048C	0	2026.02	High	0.001627	0.005302	1.96
	High	RSITIIPQDPTLFSGTIK		0.0183736	0.00210976	1	1	1	YLL048C	1	1987.12	High	0.001767	0.006153	2.23
	High	FLDLSSEISEGGSNLSQGQR		0.019514	0.00210976	1	1	1	YLL048C	0	2124.02	High	0.001767	0.006595	2.75
	High	LYSEVEMNMNSVER	1xOxidation [M]	0.0237298	0.00216078	1	1	3	YLL048C	0	1716.76	High	0.001783	0.008192	1.83
	High	QLMCLAR	1xCarbamidomethyl [C4]; 1xOxidation [M3]	0.0267615	0.00216078	1	1	1	YLL048C	0	907.449	High	0.001783	0.00941	1.84
	High	EIPPPQWPQDGK		0.0218457	0.00216078	1	1	2	YLL048C	0	1391.7	High	0.006561	0.0363	2.44
	High	YAPNLPR		0.0407046	0.00398433	1	1	2	YLL048C	0	830.452	High	0.003294	0.0158	1.61
	High	NVSFSVDAQSK		0.0413165	0.00446629	1	1	1	YLL048C	0	1181.58	High	0.003467	0.01608	1.64
	High	QIFEALK		0.0428855	0.00466421	1	1	1	YLL048C	0	848.488	High	0.003615	0.01681	1.53
	High	IGIVGR		0.0683409	0.0071867	1	2	1	YLL048C	0	614.398	High	0.005639	0.03103	1.95
	High	SVIDYDK		0.0785126	0.00846887	1	2	1	YLL048C	0	839.415	High	0.006561	0.03763	1.91
	High	NAELVVLLEDGR		0.0785126	0.00846887	1	1	1	YLL048C	0	1327.72	High	0.006561	0.03734	1.99
	High	QIFEALKR		0.0802438	0.00863652	1	1	1	YLL048C	1	1004.59	High	0.006684	0.03888	1.94
High	Master Protein	YJR121W	ATP2 SGDID:S000003882, Chr X from 647607-649142, Genome Release 64-2-1, Verified ORF, "Beta subunit of the F1 sector of mitochondrial F1F0 ATP synthase; which is a large, evolutionarily conserved enzyme complex required for ATP synthesis; F1 translationally regulates ATP6 and ATP8 expression to achieve a balanced output of ATP synthase genes encoded in nucleus and mitochondria; phosphorylated"	0	112.384	71	24	47	24	1	511	54.8	5.71	137.17	24
	Confidence	Sequence	Modifications	Qvality PEP	Qvality q-value	# Protein Groups	# Proteins	# PSMs	Master Protein Accessions	# Missed Cleavages	Theo. MH+ [Da]	Confidence (by Search Engine): Sequest HT	Percolator q-Value (by Search Engine): Sequest HT	Percolator PEP (by Search Engine): Sequest HT	XCorr (by Search Engine): Sequest HT
	High	IPSAVGYQPTLATDMGLLQER	1xOxidation [M15]	1.52303e-07	0	1	1	1	YJR121W	0	2276.16	High	0	2.048e-05	5.58
	High	IPSAVGYQPTLATDMGLLQER		2.0942e-06	0	1	1	1	YJR121W	0	2260.16	High	0	7.536e-05	5.09
	High	FLSQPFAVAEVFTGIPGK		1.40293e-07	0	1	1	4	YJR121W	0	1908.03	High	0	1.964e-05	5.16
	High	KPIHADPPSFAEQSTSAEILETGIK		2.01745e-06	0	1	1	2	YJR121W	0	2666.37	High	0	7.388e-05	4.79
	High	FTQAGSEVSALLGR		2.12012e-05	0	1	1	2	YJR121W	0	1435.75	High	0.0008405	0.001339	3.09
	High	LLDAAVVGQEHYDVASK		3.15781e-06	0	1	1	2	YJR121W	0	1814.93	High	0	9.24e-05	3.76
	High	TVFIQELINNIAK		2.44975e-06	0	1	1	3	YJR121W	0	1502.86	High	0	8.16e-05	3.05
	High	VALVFGQMNEPPGAR	1xOxidation [M8]	3.83446e-06	0	1	1	3	YJR121W	0	1601.81	High	0	0.0003502	4.47
	High	YDNIPEHAFYMVGGIEDVVAK	1xOxidation [M11]	1.16708e-08	0	1	1	2	YJR121W	0	2383.13	High	0	5.712e-06	6.02
	High	VLDTGGPISVPVGR		8.39894e-06	0	1	1	1	YJR121W	0	1366.77	High	0	0.0001489	3.94
	High	VVDLLAPYAR		0.000126312	0	1	1	1	YJR121W	0	1116.64	High	0	0.0005088	2.99
	High	AHGGFSVFTGVGER		1.78555e-05	0	1	1	2	YJR121W	0	1420.7	High	0.0004637	0.0009436	4.01
	High	DEEGQDVLLFIDNIFR		4.89307e-05	0	1	1	1	YJR121W	0	1922.95	High	0	0.0003414	3.1
	High	TIAMDGTEGLVR		0.000404887	0.000649755	1	1	1	YJR121W	0	1262.64	High	0.0004637	0.0007544	2.84
	High	IINVIGEPIDER		0.000816999	0.000649755	1	1	1	YJR121W	0	1367.75	High	0.0004637	0.0009388	3.35
	High	IGLFGGAGVGK		0.000395918	0.000649755	1	1	3	YJR121W	0	975.562	High	0.0009108	0.001971	2.75
	High	ETGVINLEGESK		0.000823125	0.000649755	1	1	1	YJR121W	0	1275.64	High	0.0004637	0.0009392	3.75
	High	LVLEVAQHLGENTVR		0.00229279	0.00106559	1	1	3	YJR121W	0	1677.93	High	0.0009108	0.001676	3.09
	High	VQETLQTYK		0.00256528	0.00106559	1	1	1	YJR121W	0	1109.58	High	0.0009108	0.00146	2.5
	High	VALTGLTIAEYFR		0.00248959	0.00106559	1	1	2	YJR121W	0	1453.8	High	0.0009108	0.001437	2.94
	High	LKDTVASFK		0.00968741	0.00106559	1	1	2	YJR121W	1	1008.57	High	0.00416	0.02022	2.55
	High	VALVFGQMNEPPGAR		0.0127998	0.00132229	1	1	2	YJR121W	0	1585.82	High	0.001205	0.004268	2.41
	High	KGSVTSVQAVYVPADDLTDPAPATTFAHLDATTVLSR		0.0128965	0.00132229	1	1	1	YJR121W	1	3814.95	High	0.001205	0.004308	3.23
	High	TIAMDGTEGLVR	1xOxidation [M4]	0.0187932	0.00210976	1	1	2	YJR121W	0	1278.64	High	0.001767	0.006337	2.17
	High	GISELGIYPAVDPLDSK		0.0208815	0.00210976	1	1	1	YJR121W	0	1773.93	High	0.001783	0.007123	2.68
	High	SLQDIIAILGMDELSEQDK	1xOxidation [M11]	0.024271	0.00216078	1	1	1	YJR121W	0	2134.06	High	0.001783	0.00839	1.95
	High	DTVASFK		0.0673461	0.00705222	1	1	1	YJR121W	0	767.393	High	0.005639	0.03039	1.49
High	Master Protein	IPI00300725 IPI:IPI00300725.6	SWISS-PROT:P02538 TREMBL:Q6UBJ0|REFSEQ_NP:NP_005545|H-INV:HIT000033986;HIT000036548 Tax_Id=9606 Keratin, type II cytoskeletal 6A	0	111.141	49	34	56	2	1	563	59.9	8	138.78	34
	Confidence	Sequence	Modifications	Qvality PEP	Qvality q-value	# Protein Groups	# Proteins	# PSMs	Master Protein Accessions	# Missed Cleavages	Theo. MH+ [Da]	Confidence (by Search Engine): Sequest HT	Percolator q-Value (by Search Engine): Sequest HT	Percolator PEP (by Search Engine): Sequest HT	XCorr (by Search Engine): Sequest HT
	High	NLDLDSIIAEVK		4.55297e-06	0	4	9	4	IPI00300725 IPI:IPI00300725.6; IPI00299145 IPI:IPI00299145.8; sp; IPI00009867 IPI:IPI00009867.2	0	1329.73	High	0	0.000136	3.76
	High	QNLEPLFEQYINNLR		1.51504e-05	0	3	6	2	IPI00300725 IPI:IPI00300725.6; IPI00299145 IPI:IPI00299145.8; IPI00009867 IPI:IPI00009867.2	0	1890.97	High	0.0004637	0.0006671	4.32
	High	LALDVEIATYR		7.26878e-05	0	4	11	7	IPI00300725 IPI:IPI00300725.6; IPI00299145 IPI:IPI00299145.8; sp; IPI00009867 IPI:IPI00009867.2	0	1263.69	High	0	0.0004051	3.37
	High	AIGGGLSSVGGGSSTIK		6.09219e-06	0	2	4	1	IPI00300725 IPI:IPI00300725.6; IPI00299145 IPI:IPI00299145.8	0	1447.78	High	0	0.0001274	3.95
	High	WTLLQEQGTK		0.000984795	0.000649755	3	6	1	IPI00300725 IPI:IPI00300725.6; IPI00299145 IPI:IPI00299145.8; IPI00009867 IPI:IPI00009867.2	0	1203.64	High	0.0004637	0.001	2.75
	High	SGFSSVSVSR		0.000384268	0.000649755	1	1	1	IPI00300725 IPI:IPI00300725.6	0	1012.51	High	0.0004637	0.0007423	2.76
	High	YEELQVTAGR		0.00143109	0.000649755	2	6	1	IPI00300725 IPI:IPI00300725.6; IPI00299145 IPI:IPI00299145.8	0	1165.58	High	0.0004637	0.001145	2.93
	High	NTKQEIAEINR		0.00110988	0.000649755	2	5	1	IPI00300725 IPI:IPI00300725.6; IPI00299145 IPI:IPI00299145.8	1	1315.7	High	0.0004637	0.001043	2.78
	High	TAAENEFVTLKK		0.00171247	0.000649755	2	5	1	IPI00300725 IPI:IPI00300725.6; IPI00299145 IPI:IPI00299145.8	1	1350.73	High	0.0004637	0.001231	2.18
	High	DVDAAYMNK		0.00129854	0.000649755	4	8	1	IPI00300725 IPI:IPI00300725.6; IPI00299145 IPI:IPI00299145.8; IPI00009867 IPI:IPI00009867.2; IPI00103481 IPI:IPI00103481.1	0	1026.46	High	0.0004637	0.001103	2.9
	High	AQYEEIAQR		0.00130828	0.000649755	3	7	2	IPI00300725 IPI:IPI00300725.6; IPI00299145 IPI:IPI00299145.8; sp	0	1107.54	High	0.0009108	0.002008	2.56
	High	QEIAEINR		0.00481504	0.00106559	2	5	1	IPI00300725 IPI:IPI00300725.6; IPI00299145 IPI:IPI00299145.8	0	972.511	High	0.0009108	0.002005	2.31
	High	QLDSIVGER		0.00722405	0.00106559	3	6	1	IPI00300725 IPI:IPI00300725.6; IPI00299145 IPI:IPI00299145.8; IPI00009867 IPI:IPI00009867.2	0	1016.54	High	0.00103	0.002638	2.37
	High	ISIGGGSCAISGGYGSR	1xCarbamidomethyl [C8]	0.00968741	0.00106559	2	4	1	IPI00300725 IPI:IPI00300725.6; IPI00299145 IPI:IPI00299145.8	0	1598.76	High	0.00103	0.003328	1.63
	High	NKYEDEINKR		0.00187332	0.00106559	4	10	6	IPI00300725 IPI:IPI00300725.6; IPI00299145 IPI:IPI00299145.8; IPI00009867 IPI:IPI00009867.2; IPI00556624 IPI:IPI00556624.1	2	1308.65	High	0.0008405	0.001275	3.55
	High	NKLEGLEDALQK		0.00185936	0.00106559	2	5	1	IPI00300725 IPI:IPI00300725.6; IPI00299145 IPI:IPI00299145.8	1	1357.73	High	0.0008405	0.001273	3.6
	High	AEAESWYQTK		0.00744464	0.00106559	2	6	1	IPI00300725 IPI:IPI00300725.6; IPI00299145 IPI:IPI00299145.8	0	1212.55	High	0.00103	0.0027	2.79
	High	SRAEAESWYQTK		0.0047433	0.00106559	2	6	2	IPI00300725 IPI:IPI00300725.6; IPI00299145 IPI:IPI00299145.8	1	1455.69	High	0.0009108	0.00199	3.45
	High	ASTSTTIR	1xAcetyl [N-Term]	0.00790631	0.00106559	2	4	1	IPI00300725 IPI:IPI00300725.6; IPI00299145 IPI:IPI00299145.8	0	878.458	High	0.00103	0.002824	2.16
	High	KLLEGEECR	1xCarbamidomethyl [C8]	0.00359378	0.00106559	5	12	1	IPI00174775 IPI:IPI00174775.1; IPI00300725 IPI:IPI00300725.6; IPI00299145 IPI:IPI00299145.8; sp; IPI00009867 IPI:IPI00009867.2	1	1133.56	High	0.0009108	0.001712	3.58
	High	EYQELMNVK		0.00885085	0.00106559	2	7	1	IPI00300725 IPI:IPI00300725.6; IPI00299145 IPI:IPI00299145.8	0	1153.56	High	0.00103	0.003093	2.13
	High	LALDVEIATYRK		0.00477904	0.00106559	4	11	1	IPI00300725 IPI:IPI00300725.6; IPI00299145 IPI:IPI00299145.8; sp; IPI00009867 IPI:IPI00009867.2	1	1391.79	High	0.0009108	0.002002	2.8
	High	GMQDLVEDFK	1xOxidation [M2]	0.00326013	0.00106559	1	2	1	IPI00300725 IPI:IPI00300725.6	0	1197.55	High	0.0009108	0.001626	2.29
	High	NKYEDEINK		0.0136975	0.00132229	4	11	1	IPI00300725 IPI:IPI00300725.6; IPI00299145 IPI:IPI00299145.8; IPI00009867 IPI:IPI00009867.2; IPI00556624 IPI:IPI00556624.1	1	1152.55	High	0.001205	0.004559	2.59
	High	GSGGLGGACGGAGFGSR	1xCarbamidomethyl [C9]	0.0127037	0.00132229	2	4	1	IPI00300725 IPI:IPI00300725.6; IPI00299145 IPI:IPI00299145.8	0	1424.63	High	0.001205	0.004266	2.29
	High	YEDEINK		0.0121425	0.00132229	6	16	1	IPI00300725 IPI:IPI00300725.6; IPI00299145 IPI:IPI00299145.8; sp; IPI00009867 IPI:IPI00009867.2; IPI00376379 IPI:IPI00376379.1; IPI00556624 IPI:IPI00556624.1	0	910.415	High	0.001205	0.004075	1.4
	High	LLEGEECR	1xCarbamidomethyl [C7]	0.0153358	0.00162885	6	13	1	IPI00174775 IPI:IPI00174775.1; IPI00300725 IPI:IPI00300725.6; IPI00299145 IPI:IPI00299145.8; sp; IPI00009867 IPI:IPI00009867.2; IPI00166205 IPI:IPI00166205.2	0	1005.47	High	0.001424	0.005102	2.03
	High	FASFIDK		0.0201104	0.00210976	8	22	3	IPI00174775 IPI:IPI00174775.1; IPI00300725 IPI:IPI00300725.6; IPI00299145 IPI:IPI00299145.8; sp; IPI00009867 IPI:IPI00009867.2; IPI00061200 IPI:IPI00061200.1; IPI00103481 IPI:IPI00103481.1; IPI00376379 IPI:IPI00376379.1	0	827.43	High	0.001783	0.00956	2.57
	High	DVDAAYMNK	1xOxidation [M7]	0.0199597	0.00210976	4	8	2	IPI00300725 IPI:IPI00300725.6; IPI00299145 IPI:IPI00299145.8; IPI00009867 IPI:IPI00009867.2; IPI00103481 IPI:IPI00103481.1	0	1042.45	High	0.001783	0.01078	1.73
	High	ADTLTDEINFLR		0.0232005	0.00216078	2	5	1	IPI00300725 IPI:IPI00300725.6; IPI00299145 IPI:IPI00299145.8	0	1407.71	High	0.001783	0.007979	2.42
	High	YEDEINKR		0.0353175	0.00335822	6	15	2	IPI00300725 IPI:IPI00300725.6; IPI00299145 IPI:IPI00299145.8; sp; IPI00009867 IPI:IPI00009867.2; IPI00376379 IPI:IPI00376379.1; IPI00556624 IPI:IPI00556624.1	1	1066.52	High	0.002654	0.01318	2.13
	High	FASFIDKVR		0.0374948	0.00354048	8	21	1	IPI00174775 IPI:IPI00174775.1; IPI00300725 IPI:IPI00300725.6; IPI00299145 IPI:IPI00299145.8; sp; IPI00009867 IPI:IPI00009867.2; IPI00061200 IPI:IPI00061200.1; IPI00103481 IPI:IPI00103481.1; IPI00376379 IPI:IPI00376379.1	1	1082.6	High	0.00279	0.01425	2.39
	High	SLYGLGGSK		0.042251	0.00466421	2	4	1	IPI00300725 IPI:IPI00300725.6; IPI00299145 IPI:IPI00299145.8	0	881.473	High	0.003615	0.01648	2.05
	High	QNLEPLFEQYINNLRR		0.0497626	0.00540776	3	6	1	IPI00300725 IPI:IPI00300725.6; IPI00299145 IPI:IPI00299145.8; IPI00009867 IPI:IPI00009867.2	1	2047.07	High	0.00416	0.02032	2.66
	High	VELQAK		0.0564384	0.00621096	5	12	1	IPI00174775 IPI:IPI00174775.1; IPI00300725 IPI:IPI00300725.6; IPI00299145 IPI:IPI00299145.8; IPI00061200 IPI:IPI00061200.1; IPI00103481 IPI:IPI00103481.1	0	687.404	High	0.00491	0.02396	1.55
High	Master Protein	IPI00299145 IPI:IPI00299145.8	SWISS-PROT:P48668 REFSEQ_NP:NP_775109|ENSEMBL:ENSP00000252250 Tax_Id=9606 Keratin, type II cytoskeletal 6E	0	110.897	49	34	57	2	1	563	59.9	8	140.79	34
	Confidence	Sequence	Modifications	Qvality PEP	Qvality q-value	# Protein Groups	# Proteins	# PSMs	Master Protein Accessions	# Missed Cleavages	Theo. MH+ [Da]	Confidence (by Search Engine): Sequest HT	Percolator q-Value (by Search Engine): Sequest HT	Percolator PEP (by Search Engine): Sequest HT	XCorr (by Search Engine): Sequest HT
	High	NLDLDSIIAEVK		4.55297e-06	0	4	9	4	IPI00300725 IPI:IPI00300725.6; IPI00299145 IPI:IPI00299145.8; sp; IPI00009867 IPI:IPI00009867.2	0	1329.73	High	0	0.000136	3.76
	High	QNLEPLFEQYINNLR		1.51504e-05	0	3	6	2	IPI00300725 IPI:IPI00300725.6; IPI00299145 IPI:IPI00299145.8; IPI00009867 IPI:IPI00009867.2	0	1890.97	High	0.0004637	0.0006671	4.32
	High	LALDVEIATYR		7.26878e-05	0	4	11	7	IPI00300725 IPI:IPI00300725.6; IPI00299145 IPI:IPI00299145.8; sp; IPI00009867 IPI:IPI00009867.2	0	1263.69	High	0	0.0004051	3.37
	High	AIGGGLSSVGGGSSTIK		6.09219e-06	0	2	4	1	IPI00300725 IPI:IPI00300725.6; IPI00299145 IPI:IPI00299145.8	0	1447.78	High	0	0.0001274	3.95
	High	WTLLQEQGTK		0.000984795	0.000649755	3	6	1	IPI00300725 IPI:IPI00300725.6; IPI00299145 IPI:IPI00299145.8; IPI00009867 IPI:IPI00009867.2	0	1203.64	High	0.0004637	0.001	2.75
	High	SGFSSISVSR		0.00168704	0.000649755	1	3	1	IPI00299145 IPI:IPI00299145.8	0	1026.52	High	0.0004637	0.001221	2.6
	High	YEELQVTAGR		0.00143109	0.000649755	2	6	1	IPI00300725 IPI:IPI00300725.6; IPI00299145 IPI:IPI00299145.8	0	1165.58	High	0.0004637	0.001145	2.93
	High	NTKQEIAEINR		0.00110988	0.000649755	2	5	1	IPI00300725 IPI:IPI00300725.6; IPI00299145 IPI:IPI00299145.8	1	1315.7	High	0.0004637	0.001043	2.78
	High	TAAENEFVTLKK		0.00171247	0.000649755	2	5	1	IPI00300725 IPI:IPI00300725.6; IPI00299145 IPI:IPI00299145.8	1	1350.73	High	0.0004637	0.001231	2.18
	High	DVDAAYMNK		0.00129854	0.000649755	4	8	1	IPI00300725 IPI:IPI00300725.6; IPI00299145 IPI:IPI00299145.8; IPI00009867 IPI:IPI00009867.2; IPI00103481 IPI:IPI00103481.1	0	1026.46	High	0.0004637	0.001103	2.9
	High	AQYEEIAQR		0.00130828	0.000649755	3	7	2	IPI00300725 IPI:IPI00300725.6; IPI00299145 IPI:IPI00299145.8; sp	0	1107.54	High	0.0009108	0.002008	2.56
	High	QEIAEINR		0.00481504	0.00106559	2	5	1	IPI00300725 IPI:IPI00300725.6; IPI00299145 IPI:IPI00299145.8	0	972.511	High	0.0009108	0.002005	2.31
	High	QLDSIVGER		0.00722405	0.00106559	3	6	1	IPI00300725 IPI:IPI00300725.6; IPI00299145 IPI:IPI00299145.8; IPI00009867 IPI:IPI00009867.2	0	1016.54	High	0.00103	0.002638	2.37
	High	ISIGGGSCAISGGYGSR	1xCarbamidomethyl [C8]	0.00968741	0.00106559	2	4	1	IPI00300725 IPI:IPI00300725.6; IPI00299145 IPI:IPI00299145.8	0	1598.76	High	0.00103	0.003328	1.63
	High	NKYEDEINKR		0.00187332	0.00106559	4	10	6	IPI00300725 IPI:IPI00300725.6; IPI00299145 IPI:IPI00299145.8; IPI00009867 IPI:IPI00009867.2; IPI00556624 IPI:IPI00556624.1	2	1308.65	High	0.0008405	0.001275	3.55
	High	NKLEGLEDALQK		0.00185936	0.00106559	2	5	1	IPI00300725 IPI:IPI00300725.6; IPI00299145 IPI:IPI00299145.8	1	1357.73	High	0.0008405	0.001273	3.6
	High	NMQDLVEDLK	1xOxidation [M2]	0.00370318	0.00106559	1	3	2	IPI00299145 IPI:IPI00299145.8	0	1220.58	High	0.005639	0.03103	2.45
	High	AEAESWYQTK		0.00744464	0.00106559	2	6	1	IPI00300725 IPI:IPI00300725.6; IPI00299145 IPI:IPI00299145.8	0	1212.55	High	0.00103	0.0027	2.79
	High	SRAEAESWYQTK		0.0047433	0.00106559	2	6	2	IPI00300725 IPI:IPI00300725.6; IPI00299145 IPI:IPI00299145.8	1	1455.69	High	0.0009108	0.00199	3.45
	High	ASTSTTIR	1xAcetyl [N-Term]	0.00790631	0.00106559	2	4	1	IPI00300725 IPI:IPI00300725.6; IPI00299145 IPI:IPI00299145.8	0	878.458	High	0.00103	0.002824	2.16
	High	KLLEGEECR	1xCarbamidomethyl [C8]	0.00359378	0.00106559	5	12	1	IPI00174775 IPI:IPI00174775.1; IPI00300725 IPI:IPI00300725.6; IPI00299145 IPI:IPI00299145.8; sp; IPI00009867 IPI:IPI00009867.2	1	1133.56	High	0.0009108	0.001712	3.58
	High	EYQELMNVK		0.00885085	0.00106559	2	7	1	IPI00300725 IPI:IPI00300725.6; IPI00299145 IPI:IPI00299145.8	0	1153.56	High	0.00103	0.003093	2.13
	High	LALDVEIATYRK		0.00477904	0.00106559	4	11	1	IPI00300725 IPI:IPI00300725.6; IPI00299145 IPI:IPI00299145.8; sp; IPI00009867 IPI:IPI00009867.2	1	1391.79	High	0.0009108	0.002002	2.8
	High	NKYEDEINK		0.0136975	0.00132229	4	11	1	IPI00300725 IPI:IPI00300725.6; IPI00299145 IPI:IPI00299145.8; IPI00009867 IPI:IPI00009867.2; IPI00556624 IPI:IPI00556624.1	1	1152.55	High	0.001205	0.004559	2.59
	High	GSGGLGGACGGAGFGSR	1xCarbamidomethyl [C9]	0.0127037	0.00132229	2	4	1	IPI00300725 IPI:IPI00300725.6; IPI00299145 IPI:IPI00299145.8	0	1424.63	High	0.001205	0.004266	2.29
	High	YEDEINK		0.0121425	0.00132229	6	16	1	IPI00300725 IPI:IPI00300725.6; IPI00299145 IPI:IPI00299145.8; sp; IPI00009867 IPI:IPI00009867.2; IPI00376379 IPI:IPI00376379.1; IPI00556624 IPI:IPI00556624.1	0	910.415	High	0.001205	0.004075	1.4
	High	LLEGEECR	1xCarbamidomethyl [C7]	0.0153358	0.00162885	6	13	1	IPI00174775 IPI:IPI00174775.1; IPI00300725 IPI:IPI00300725.6; IPI00299145 IPI:IPI00299145.8; sp; IPI00009867 IPI:IPI00009867.2; IPI00166205 IPI:IPI00166205.2	0	1005.47	High	0.001424	0.005102	2.03
	High	FASFIDK		0.0201104	0.00210976	8	22	3	IPI00174775 IPI:IPI00174775.1; IPI00300725 IPI:IPI00300725.6; IPI00299145 IPI:IPI00299145.8; sp; IPI00009867 IPI:IPI00009867.2; IPI00061200 IPI:IPI00061200.1; IPI00103481 IPI:IPI00103481.1; IPI00376379 IPI:IPI00376379.1	0	827.43	High	0.001783	0.00956	2.57
	High	DVDAAYMNK	1xOxidation [M7]	0.0199597	0.00210976	4	8	2	IPI00300725 IPI:IPI00300725.6; IPI00299145 IPI:IPI00299145.8; IPI00009867 IPI:IPI00009867.2; IPI00103481 IPI:IPI00103481.1	0	1042.45	High	0.001783	0.01078	1.73
	High	ADTLTDEINFLR		0.0232005	0.00216078	2	5	1	IPI00300725 IPI:IPI00300725.6; IPI00299145 IPI:IPI00299145.8	0	1407.71	High	0.001783	0.007979	2.42
	High	YEDEINKR		0.0353175	0.00335822	6	15	2	IPI00300725 IPI:IPI00300725.6; IPI00299145 IPI:IPI00299145.8; sp; IPI00009867 IPI:IPI00009867.2; IPI00376379 IPI:IPI00376379.1; IPI00556624 IPI:IPI00556624.1	1	1066.52	High	0.002654	0.01318	2.13
	High	FASFIDKVR		0.0374948	0.00354048	8	21	1	IPI00174775 IPI:IPI00174775.1; IPI00300725 IPI:IPI00300725.6; IPI00299145 IPI:IPI00299145.8; sp; IPI00009867 IPI:IPI00009867.2; IPI00061200 IPI:IPI00061200.1; IPI00103481 IPI:IPI00103481.1; IPI00376379 IPI:IPI00376379.1	1	1082.6	High	0.00279	0.01425	2.39
	High	SLYGLGGSK		0.042251	0.00466421	2	4	1	IPI00300725 IPI:IPI00300725.6; IPI00299145 IPI:IPI00299145.8	0	881.473	High	0.003615	0.01648	2.05
	High	QNLEPLFEQYINNLRR		0.0497626	0.00540776	3	6	1	IPI00300725 IPI:IPI00300725.6; IPI00299145 IPI:IPI00299145.8; IPI00009867 IPI:IPI00009867.2	1	2047.07	High	0.00416	0.02032	2.66
	High	VELQAK		0.0564384	0.00621096	5	12	1	IPI00174775 IPI:IPI00174775.1; IPI00300725 IPI:IPI00300725.6; IPI00299145 IPI:IPI00299145.8; IPI00061200 IPI:IPI00061200.1; IPI00103481 IPI:IPI00103481.1	0	687.404	High	0.00491	0.02396	1.55
High	Master Protein	YCR012W	PGK1 SGDID:S000000605, Chr III from 137746-138996, Genome Release 64-2-1, Verified ORF, "3-phosphoglycerate kinase; catalyzes transfer of high-energy phosphoryl groups from the acyl phosphate of 1,3-bisphosphoglycerate to ADP to produce ATP; key enzyme in glycolysis and gluconeogenesis"	0	109.003	75	29	40	29	1	416	44.7	7.61	117.75	29
	Confidence	Sequence	Modifications	Qvality PEP	Qvality q-value	# Protein Groups	# Proteins	# PSMs	Master Protein Accessions	# Missed Cleavages	Theo. MH+ [Da]	Confidence (by Search Engine): Sequest HT	Percolator q-Value (by Search Engine): Sequest HT	Percolator PEP (by Search Engine): Sequest HT	XCorr (by Search Engine): Sequest HT
	High	ISHVSTGGGASLELLEGK		0.000156852	0	1	1	3	YCR012W	0	1754.93	High	0	0.0005537	4.62
	High	DVTFLNDCVGPEVEAAVK	1xCarbamidomethyl [C8]	3.6121e-06	0	1	1	2	YCR012W	0	1962.95	High	0	9.857e-05	3.56
	High	HELSSLADVYINDAFGTAHR		8.43959e-05	0	1	1	2	YCR012W	0	2216.07	High	0	0.0004818	4.23
	High	FRHELSSLADVYINDAFGTAHR		3.69549e-09	0	1	1	2	YCR012W	1	2519.24	High	0	3.229e-06	7.75
	High	KVLENTEIGDSIFDK		1.77226e-05	0	1	1	1	YCR012W	1	1707.88	High	0	0.0002134	5.35
	High	ASAPGSVILLENLR		3.245e-05	0	1	1	2	YCR012W	0	1439.82	High	0	0.0002825	4.11
	High	VLENTEIGDSIFDK		4.65612e-06	0	1	1	1	YCR012W	0	1579.78	High	0	0.0001119	3.91
	High	ALENPTRPFLAILGGAK		1.22005e-05	0	1	1	1	YCR012W	0	1768.01	High	0	0.0001783	3.91
	High	AHSSMVGFDLPQR	1xOxidation [M5]	4.02961e-05	0	1	1	1	YCR012W	0	1460.7	High	0	0.0003127	3.97
	High	SSAAGNTVIIGGGDTATVAK		8.03093e-06	0	1	1	2	YCR012W	0	1789.93	High	0	0.0002732	4.74
	High	YVLEHHPR		0.00110988	0.000649755	1	1	2	YCR012W	0	1050.55	High	0.0004637	0.001042	2.27
	High	GVEVVLPVDFIIADAFSADANTK		0.00139935	0.000649755	1	1	1	YCR012W	0	2391.24	High	0.0004637	0.001138	2.72
	High	TVTDKEGIPAGWQGLDNGPESR		0.00113505	0.000649755	1	1	1	YCR012W	1	2327.13	High	0.0004637	0.00105	3.32
	High	AHSSMVGFDLPQR		0.000735869	0.000649755	1	1	2	YCR012W	0	1444.7	High	0.0004637	0.0009061	3.17
	High	LSVQDLDLK		0.00572271	0.00106559	1	1	1	YCR012W	0	1030.58	High	0.0009108	0.002243	2.1
	High	ELQSLLGK		0.00947111	0.00106559	1	1	1	YCR012W	0	887.52	High	0.00103	0.003261	2.9
	High	ALLDEVVK		0.00660089	0.00106559	1	1	1	YCR012W	0	886.524	High	0.0009108	0.002469	2.31
	High	VDFNVPLDGK		0.00912132	0.00106559	1	1	1	YCR012W	0	1103.57	High	0.00103	0.003167	2.78
	High	YHIEEEGSRK		0.0113468	0.00106559	1	1	1	YCR012W	1	1247.6	High	0.00103	0.003815	3.22
	High	AGAEIVPK		0.00563738	0.00106559	1	1	1	YCR012W	0	784.456	High	0.0009108	0.002214	3.34
	High	TIVWNGPPGVFEFEK		0.0115189	0.00106559	1	1	1	YCR012W	0	1719.87	High	0.00103	0.003881	1.98
	High	KLFAATVAK		0.00534868	0.00106559	1	1	1	YCR012W	1	948.588	High	0.0009108	0.00214	2.87
	High	LFAATVAK		0.0138011	0.00132229	1	1	1	YCR012W	0	820.493	High	0.001205	0.004612	1.83
	High	AAGFLLEK		0.01981	0.00210976	1	1	1	YCR012W	0	848.488	High	0.001767	0.006676	2.14
	High	IVAALPTIK		0.0320415	0.00239809	1	1	1	YCR012W	0	925.608	High	0.001955	0.01175	1.6
	High	ELPGVAFLSEK		0.0345334	0.00335822	1	1	2	YCR012W	0	1189.65	High	0.002654	0.01284	1.97
	High	YHIEEEGSR		0.0512611	0.00540776	1	1	1	YCR012W	0	1119.51	High	0.00416	0.02115	1.4
	High	KYGVTDK		0.0585609	0.0063287	1	1	1	YCR012W	1	810.436	High	0.004998	0.02521	2.05
	High	IQLIDNLLDK		0.0658798	0.00705222	1	1	1	YCR012W	0	1184.69	High	0.00553	0.02959	2.03
	High	VDFNVPLDGKK		0.0808289	0.00863652	1	1	1	YCR012W	1	1231.67	High	0.006684	0.03913	2.38
High	Master Protein	IPI00376379 IPI:IPI00376379.1	SWISS-PROT:Q7Z794 REFSEQ_NP:NP_778253|ENSEMBL:ENSP00000342710 Tax_Id=9606 Keratin 1B	0	105.521	40	28	54	22	1	578	61.8	5.97	138.12	28
	Confidence	Sequence	Modifications	Qvality PEP	Qvality q-value	# Protein Groups	# Proteins	# PSMs	Master Protein Accessions	# Missed Cleavages	Theo. MH+ [Da]	Confidence (by Search Engine): Sequest HT	Percolator q-Value (by Search Engine): Sequest HT	Percolator PEP (by Search Engine): Sequest HT	XCorr (by Search Engine): Sequest HT
	High	QIEQMQSLISDAEER	1xOxidation [M5]	5.39188e-05	0	1	1	1	IPI00376379 IPI:IPI00376379.1	0	1792.84	High	0	0.000356	2.12
	High	FLEQQNQVLQTK		2.80218e-06	0	3	4	13	sp; IPI00376379 IPI:IPI00376379.1; IPI00556624 IPI:IPI00556624.1	0	1475.79	High	0	8.717e-05	4.86
	High	GEQALQDAWQK		2.75339e-05	0	1	1	1	IPI00376379 IPI:IPI00376379.1	0	1273.62	High	0	0.000262	3.67
	High	VDTLTGEVNFLK		6.74576e-05	0	1	1	2	IPI00376379 IPI:IPI00376379.1	0	1335.72	High	0	0.0003928	3.22
	High	TGSENDFVVLK		2.20078e-05	0	1	1	1	IPI00376379 IPI:IPI00376379.1	0	1208.62	High	0	0.0002357	4.09
	High	SMQDVVEDYK	1xOxidation [M2]	0.000115485	0	1	1	1	IPI00376379 IPI:IPI00376379.1	0	1229.54	High	0	0.0004907	3.23
	High	SMQDVVEDYK		0.00117828	0.000649755	1	1	1	IPI00376379 IPI:IPI00376379.1	0	1213.54	High	0.0004637	0.001064	2.81
	High	YQELQITAGR		0.00037296	0.000649755	1	1	1	IPI00376379 IPI:IPI00376379.1	0	1178.62	High	0.0004637	0.0007367	2.99
	High	SKDEAEALYQTK		0.000321223	0.000649755	1	1	2	IPI00376379 IPI:IPI00376379.1	1	1382.68	High	0.0004637	0.0007034	3.96
	High	STSGFCQGGGVGGFGGGR	1xCarbamidomethyl [C6]	0.000677823	0.000649755	1	1	1	IPI00376379 IPI:IPI00376379.1	0	1644.72	High	0.0004637	0.0008828	2.53
	High	LSLDVEIATYR		0.000804882	0.000649755	2	2	1	IPI00166205 IPI:IPI00166205.2; IPI00376379 IPI:IPI00376379.1	0	1279.69	High	0.0004637	0.0009334	3.15
	High	QIEQMQSLISDAEER		0.000719562	0.000649755	1	1	2	IPI00376379 IPI:IPI00376379.1	0	1776.84	High	0.0004637	0.0009106	3.64
	High	DVDAAYVSK		0.00983435	0.00106559	1	1	1	IPI00376379 IPI:IPI00376379.1	0	967.473	High	0.00103	0.003377	2.57
	High	QLLEGEESR		0.00370318	0.00106559	1	1	1	IPI00376379 IPI:IPI00376379.1	0	1060.53	High	0.0009108	0.001738	2.34
	High	QVDLLSAEQMR		0.0089177	0.00106559	1	1	1	IPI00376379 IPI:IPI00376379.1	0	1289.65	High	0.00103	0.003114	2.43
	High	LQAEISNVK		0.00309354	0.00106559	1	1	1	IPI00376379 IPI:IPI00376379.1	0	1001.56	High	0.0009108	0.001585	2.41
	High	DYQAMLGVK	1xOxidation [M5]	0.0114325	0.00106559	1	1	2	IPI00376379 IPI:IPI00376379.1	0	1040.51	High	0.00103	0.003865	2.11
	High	SKYEDEINKR		0.00814782	0.00106559	1	1	1	IPI00376379 IPI:IPI00376379.1	2	1281.64	High	0.00103	0.002891	2.98
	High	SISINLMGR		0.00417528	0.00106559	1	1	1	IPI00376379 IPI:IPI00376379.1	0	990.54	High	0.0009108	0.001853	2.01
	High	TQYELIAQR		0.00802616	0.00106559	1	1	1	IPI00376379 IPI:IPI00376379.1	0	1121.59	High	0.00103	0.002847	2.92
	High	KQIEQMQSLISDAEER		0.00555333	0.00106559	1	1	1	IPI00376379 IPI:IPI00376379.1	1	1904.94	High	0.0009108	0.002195	2.51
	High	EQIMVLNNK	1xOxidation [M4]	0.00282759	0.00106559	1	1	1	IPI00376379 IPI:IPI00376379.1	0	1104.57	High	0.0009108	0.001522	2.72
	High	EQIMVLNNK		0.00716994	0.00106559	1	1	1	IPI00376379 IPI:IPI00376379.1	0	1088.58	High	0.00103	0.002621	2.47
	High	SISINLMGR	1xOxidation [M7]	0.0145482	0.00132229	1	1	1	IPI00376379 IPI:IPI00376379.1	0	1006.53	High	0.001205	0.004838	2.38
	High	YEDEINK		0.0121425	0.00132229	6	16	1	IPI00300725 IPI:IPI00300725.6; IPI00299145 IPI:IPI00299145.8; sp; IPI00009867 IPI:IPI00009867.2; IPI00376379 IPI:IPI00376379.1; IPI00556624 IPI:IPI00556624.1	0	910.415	High	0.001205	0.004075	1.4
	High	TGSENDFVVLKK		0.0152207	0.00162885	1	1	2	IPI00376379 IPI:IPI00376379.1	1	1336.71	High	0.00459	0.02283	2.09
	High	FASFIDK		0.0201104	0.00210976	8	22	3	IPI00174775 IPI:IPI00174775.1; IPI00300725 IPI:IPI00300725.6; IPI00299145 IPI:IPI00299145.8; sp; IPI00009867 IPI:IPI00009867.2; IPI00061200 IPI:IPI00061200.1; IPI00103481 IPI:IPI00103481.1; IPI00376379 IPI:IPI00376379.1	0	827.43	High	0.001783	0.00956	2.57
	High	MEIAELNR		0.0183736	0.00210976	1	1	1	IPI00376379 IPI:IPI00376379.1	0	975.493	High	0.001767	0.006192	2.54
	High	SLYNLGGSR		0.0176948	0.00210976	1	1	1	IPI00376379 IPI:IPI00376379.1	0	966.5	High	0.001767	0.005921	2.22
	High	LQAEISNVKK		0.0255821	0.00216078	1	1	2	IPI00376379 IPI:IPI00376379.1	1	1129.66	High	0.001783	0.008984	2.33
	High	YEDEINKR		0.0353175	0.00335822	6	15	2	IPI00300725 IPI:IPI00300725.6; IPI00299145 IPI:IPI00299145.8; sp; IPI00009867 IPI:IPI00009867.2; IPI00376379 IPI:IPI00376379.1; IPI00556624 IPI:IPI00556624.1	1	1066.52	High	0.002654	0.01318	2.13
	High	FASFIDKVR		0.0374948	0.00354048	8	21	1	IPI00174775 IPI:IPI00174775.1; IPI00300725 IPI:IPI00300725.6; IPI00299145 IPI:IPI00299145.8; sp; IPI00009867 IPI:IPI00009867.2; IPI00061200 IPI:IPI00061200.1; IPI00103481 IPI:IPI00103481.1; IPI00376379 IPI:IPI00376379.1	1	1082.6	High	0.00279	0.01425	2.39
	High	QVDLLSAEQMR	1xOxidation [M10]	0.0653979	0.00687016	1	1	1	IPI00376379 IPI:IPI00376379.1	0	1305.65	High	0.0054	0.02912	2.4
High	Master Protein	YBR127C	VMA2 SGDID:S000000331, Chr II from 492822-491269, Genome Release 64-2-1, reverse complement, Verified ORF, "Subunit B of V1 peripheral membrane domain of vacuolar H+-ATPase; an electrogenic proton pump found throughout the endomembrane system; contains nucleotide binding sites; also detected in the cytoplasm; protein abundance increases in response to DNA replication stress"	0	97.468	63	26	39	26	1	517	57.7	5.07	101.68	26
	Confidence	Sequence	Modifications	Qvality PEP	Qvality q-value	# Protein Groups	# Proteins	# PSMs	Master Protein Accessions	# Missed Cleavages	Theo. MH+ [Da]	Confidence (by Search Engine): Sequest HT	Percolator q-Value (by Search Engine): Sequest HT	Percolator PEP (by Search Engine): Sequest HT	XCorr (by Search Engine): Sequest HT
	High	GYPGYMYTDLSTIYER	1xOxidation [M6]	8.48417e-07	0	1	1	1	YBR127C	0	1944.87	High	0	4.822e-05	4.16
	High	HVLTILTDMSSYADALR	1xOxidation [M9]	0.000132099	0	1	1	1	YBR127C	0	1921.97	High	0	0.0005186	3.32
	High	HVLTILTDMSSYADALR		7.7946e-06	0	1	1	2	YBR127C	0	1905.97	High	0	0.0001437	5.1
	High	LALTTAEYLAYQTER		8.17324e-07	0	1	1	2	YBR127C	0	1742.9	High	0	4.733e-05	3.96
	High	AIVQVFEGTSGIDVK		3.73966e-05	0	1	1	2	YBR127C	0	1562.84	High	0	0.0003019	3.18
	High	TSLFLNLANDPTIER		6.20014e-07	0	1	1	2	YBR127C	0	1703.9	High	0	4.118e-05	4.57
	High	AVEQGFNVKPR		0.000231271	0	1	1	2	YBR127C	0	1244.67	High	0	0.0006342	2.75
	High	DDADEDEEDPDTR		1.29856e-06	0	1	1	1	YBR127C	0	1521.55	High	0	5.953e-05	3.73
	High	YNEIVNLTLPDGTVR		0.00156546	0.000649755	1	1	2	YBR127C	0	1703.9	High	0.0004637	0.001189	3.1
	High	KDHGDVSNQLYAK		0.000477175	0.000649755	1	1	1	YBR127C	1	1474.73	High	0.0004637	0.0007934	3.92
	High	IYPEEMISTGVSAIDTMNSIAR	2xOxidation [M6; M17]	0.000854455	0.000649755	1	1	1	YBR127C	0	2430.15	High	0.0004637	0.000952	3.09
	High	TTVEFTGESLR		0.000252951	0.000649755	1	1	2	YBR127C	0	1239.62	High	0.0004637	0.0006725	3.16
	High	DHGDVSNQLYAK		0.000566592	0.000649755	1	1	2	YBR127C	0	1346.63	High	0.0004637	0.0008352	3.26
	High	QAGLVRPTK		0.00302479	0.00106559	1	1	1	YBR127C	0	969.584	High	0.0009108	0.001569	2.74
	High	SAIGEGMTR		0.0060317	0.00106559	1	1	1	YBR127C	0	921.446	High	0.0009108	0.002324	1.87
	High	QGQVLEIR		0.00947111	0.00106559	1	1	1	YBR127C	0	942.537	High	0.00103	0.003261	2.23
	High	ARDDADEDEEDPDTR		0.00335934	0.00106559	1	1	1	YBR127C	1	1748.68	High	0.0009108	0.001655	3.64
	High	AVVGEEALSIEDK		0.00258456	0.00106559	1	1	1	YBR127C	0	1359.7	High	0.0009108	0.001461	2.95
	High	TFITQGAYEDR		0.00245259	0.00106559	1	1	1	YBR127C	0	1300.62	High	0.0009108	0.001428	1.94
	High	KTTVEFTGESLR		0.011606	0.00106559	1	1	1	YBR127C	1	1367.72	High	0.00103	0.0039	3.12
	High	GIYPPINVLPSLSR		0.00197405	0.00106559	1	1	2	YBR127C	0	1525.87	High	0.0008405	0.001303	3.01
	High	TVFESLDQAWSLLR		0.0178285	0.00210976	1	1	1	YBR127C	0	1664.86	High	0.001767	0.005962	1.36
	High	GYPGYMYTDLSTIYER		0.0237298	0.00216078	1	1	1	YBR127C	0	1928.87	High	0.001783	0.008178	1.5
	High	LSLEFLEK		0.0240893	0.00216078	1	1	1	YBR127C	0	978.551	High	0.001783	0.008324	1.94
	High	IPIFSASGLPHNEIAAQICR	1xCarbamidomethyl [C19]	0.0392136	0.00377955	1	1	1	YBR127C	0	2194.14	High	0.002962	0.01504	2.8
	High	IPVSEDMLGR		0.0458575	0.0050128	1	1	1	YBR127C	0	1116.57	High	0.003872	0.01841	1.87
	High	IYPEEMISTGVSAIDTMNSIAR	1xOxidation [M]	0.0461998	0.0050128	1	1	2	YBR127C	0	2414.16	High	0.003872	0.01852	2.21
	High	DVHDGHEENFSIVFAAMGVNLETAR	1xOxidation [M17]	0.0520266	0.00561266	1	1	1	YBR127C	0	2774.28	High	0.004311	0.02167	2.38
	High	LNYNTVSGVNGPLVILEK		0.0907499	0.00964334	1	1	1	YBR127C	0	1930.06	High	0.007424	0.04625	2.13
High	Master Protein	IPI00384444 IPI:IPI00384444.4	SWISS-PROT:P02533 TREMBL:Q9UBN2;Q13092;Q53XY3;Q9UBN3|REFSEQ_NP:NP_000517|ENSEMBL:ENSP00000167586|H-INV:HIT000031101;HIT000038549 Tax_Id=9606 Keratin, type I cytoskeletal 14	0	97.048	59	29	69	11	1	471	51.5	5.16	168.67	29
	Confidence	Sequence	Modifications	Qvality PEP	Qvality q-value	# Protein Groups	# Proteins	# PSMs	Master Protein Accessions	# Missed Cleavages	Theo. MH+ [Da]	Confidence (by Search Engine): Sequest HT	Percolator q-Value (by Search Engine): Sequest HT	Percolator PEP (by Search Engine): Sequest HT	XCorr (by Search Engine): Sequest HT
	High	ISSVLAGGSCR	1xCarbamidomethyl [C10]	0.000191888	0	2	2	1	IPI00384444 IPI:IPI00384444.4; IPI00217963 IPI:IPI00217963.2	0	1106.56	High	0	0.0005958	2.97
	High	ILTATVDNANVLLQIDNAR		1.79025e-06	0	1	1	1	IPI00384444 IPI:IPI00384444.4	0	2054.12	High	0	6.973e-05	4.73
	High	EVATNSELVQSGK		2.44331e-05	0	2	2	1	IPI00384444 IPI:IPI00384444.4; IPI00450768 IPI:IPI00450768.4	0	1361.69	High	0	0.0002481	3.46
	High	LLEGEDAHLSSSQFSSGSQSSR		2.42514e-05	0	1	1	1	IPI00384444 IPI:IPI00384444.4	0	2309.06	High	0	0.0002467	4
	High	TMQNLEIELQSQLSMK	1xOxidation [M15]	2.07316e-05	0	1	1	1	IPI00384444 IPI:IPI00384444.4	0	1908.94	High	0	0.0002291	4.06
	High	APSTYGGGLSVSSSR		1.70731e-05	0	1	1	1	IPI00384444 IPI:IPI00384444.4	0	1425.7	High	0	0.0002096	3.23
	High	ADLEMQIESLKEELAYLKK	1xOxidation [M5]	6.40221e-05	0	1	1	2	IPI00384444 IPI:IPI00384444.4	2	2267.18	High	0	0.0003837	4.44
	High	VTMQNLNDR	1xOxidation [M3]	0.000361986	0.000649755	6	8	20	IPI00295684 IPI:IPI00295684.1; IPI00384444 IPI:IPI00384444.4; IPI00328103 IPI:IPI00328103.1; IPI00383111 IPI:IPI00383111.1; IPI00375911 IPI:IPI00375911.1; IPI00217963 IPI:IPI00217963.2	0	1106.53	High	0.0004637	0.001192	2.91
	High	VTMQNLNDR		0.00151932	0.000649755	6	8	3	IPI00295684 IPI:IPI00295684.1; IPI00384444 IPI:IPI00384444.4; IPI00328103 IPI:IPI00328103.1; IPI00383111 IPI:IPI00383111.1; IPI00375911 IPI:IPI00375911.1; IPI00217963 IPI:IPI00217963.2	0	1090.53	High	0.0004637	0.001173	2.6
	High	VLDELTLAR		0.00102229	0.000649755	4	8	2	IPI00384444 IPI:IPI00384444.4; IPI00217963 IPI:IPI00217963.2; IPI00450768 IPI:IPI00450768.4; IPI00290077 IPI:IPI00290077.1	0	1029.59	High	0.0004637	0.001013	2.98
	High	TRLEQEIATYR		0.0015538	0.000649755	4	8	2	IPI00384444 IPI:IPI00384444.4; IPI00217963 IPI:IPI00217963.2; IPI00450768 IPI:IPI00450768.4; IPI00290077 IPI:IPI00290077.1	1	1379.73	High	0.0004637	0.001182	3.65
	High	MSVEADINGLR	1xOxidation [M1]	0.00132799	0.000649755	1	4	1	IPI00384444 IPI:IPI00384444.4	0	1220.59	High	0.0004637	0.001113	2.58
	High	QFTSSSSMK	1xOxidation [M8]	0.00121404	0.000649755	2	2	2	IPI00384444 IPI:IPI00384444.4; IPI00217963 IPI:IPI00217963.2	0	1018.45	High	0.0004637	0.001077	2.76
	High	DAEEWFFTK		0.00149677	0.000649755	1	1	1	IPI00384444 IPI:IPI00384444.4	0	1172.53	High	0.0004637	0.001168	2.99
	High	ASLENSLEETKGR		0.000562376	0.000649755	2	2	1	IPI00384444 IPI:IPI00384444.4; IPI00217963 IPI:IPI00217963.2	1	1433.72	High	0.0004637	0.0008337	3.24
	High	ASLENSLEETK		0.000558192	0.000649755	2	2	1	IPI00384444 IPI:IPI00384444.4; IPI00217963 IPI:IPI00217963.2	0	1220.6	High	0.0004637	0.000832	2.18
	High	NHEEEMNALR	1xOxidation [M6]	0.0051516	0.00106559	2	2	2	IPI00384444 IPI:IPI00384444.4; IPI00450768 IPI:IPI00450768.4	0	1258.55	High	0.00459	0.02213	2.29
	High	NHEEEMNALR		0.00201887	0.00106559	2	2	1	IPI00384444 IPI:IPI00384444.4; IPI00450768 IPI:IPI00450768.4	0	1242.55	High	0.0008405	0.001315	1.78
	High	ALEEANADLEVK		0.00203404	0.00106559	3	7	1	IPI00384444 IPI:IPI00384444.4; IPI00217963 IPI:IPI00217963.2; IPI00290077 IPI:IPI00290077.1	0	1301.66	High	0.0008405	0.001319	2.16
	High	ADLEMQIESLKEELAYLKK		0.00258456	0.00106559	1	1	1	IPI00384444 IPI:IPI00384444.4	2	2251.19	High	0.0009108	0.001464	3.16
	High	ADLEMQIESLKEELAYLK	1xOxidation [M5]	0.00295757	0.00106559	1	1	1	IPI00384444 IPI:IPI00384444.4	1	2139.09	High	0.0009108	0.001555	2.46
	High	CEMEQQNQEYK	1xCarbamidomethyl [C1]	0.00650241	0.00106559	2	2	1	IPI00384444 IPI:IPI00384444.4; IPI00450768 IPI:IPI00450768.4	0	1486.59	High	0.0009108	0.002446	2.14
	High	LAADDFR		0.00784707	0.00106559	7	27	5	IPI00295684 IPI:IPI00295684.1; IPI00384444 IPI:IPI00384444.4; IPI00383111 IPI:IPI00383111.1; sp; IPI00217963 IPI:IPI00217963.2; IPI00450768 IPI:IPI00450768.4; IPI00290077 IPI:IPI00290077.1	0	807.4	High	0.00416	0.02124	2.21
	High	LASYLDK		0.00680237	0.00106559	7	14	6	IPI00295684 IPI:IPI00295684.1; IPI00384444 IPI:IPI00384444.4; IPI00383111 IPI:IPI00383111.1; IPI00217963 IPI:IPI00217963.2; IPI00450768 IPI:IPI00450768.4; IPI00290077 IPI:IPI00290077.1; IPI00019359 IPI:IPI00019359.2	0	809.44	High	0.001955	0.0117	2.31
	High	GSCGIGGGIGGGSSR	1xPhospho [S2(100)]	0.00940009	0.00106559	2	2	1	IPI00384444 IPI:IPI00384444.4; IPI00217963 IPI:IPI00217963.2	0	1301.53	High	0.00103	0.003237	3.11
	High	DYSPYFK		0.018099	0.00210976	2	3	1	IPI00384444 IPI:IPI00384444.4; IPI00217963 IPI:IPI00217963.2	0	919.42	High	0.001767	0.00606	2.29
	High	TMQNLEIELQSQLSMK	2xOxidation [M2; M15]	0.017562	0.00210976	1	1	1	IPI00384444 IPI:IPI00384444.4	0	1924.94	High	0.001767	0.005888	2.37
	High	ADLEMQIESLK	1xOxidation [M5]	0.0255821	0.00216078	1	1	1	IPI00384444 IPI:IPI00384444.4	0	1292.64	High	0.001783	0.008951	1.52
	High	SEISELR		0.0372156	0.00354048	2	2	1	IPI00384444 IPI:IPI00384444.4; IPI00450768 IPI:IPI00450768.4	0	833.436	High	0.00279	0.01417	1.99
	High	LASYLDKVR		0.0416257	0.00466421	6	11	1	IPI00295684 IPI:IPI00295684.1; IPI00384444 IPI:IPI00384444.4; IPI00383111 IPI:IPI00383111.1; IPI00217963 IPI:IPI00217963.2; IPI00450768 IPI:IPI00450768.4; IPI00290077 IPI:IPI00290077.1	1	1064.61	High	0.003615	0.01631	2.06
	High	TEELNR		0.0703725	0.00739284	2	4	2	IPI00384444 IPI:IPI00384444.4; IPI00450768 IPI:IPI00450768.4	0	761.379	High	0.005782	0.03215	1.68
	High	QRPAEIK		0.0746089	0.00834875	1	1	1	IPI00384444 IPI:IPI00384444.4	0	841.489	High	0.006477	0.03493	1.69
	High	QRPAEIKDYSPYFK		0.0832092	0.00900523	1	1	1	IPI00384444 IPI:IPI00384444.4	1	1741.89	High	0.006955	0.0407	2.86
High	Master Protein	YBR118W	TEF2 SGDID:S000000322, Chr II from 477671-479047, Genome Release 64-2-1, Verified ORF, "Translational elongation factor EF-1 alpha; also encoded by TEF1; functions in the binding reaction of aminoacyl-tRNA (AA-tRNA) to ribosomes; TEF2-RFP levels increase during replicative aging; may also have a role in tRNA re-export from the nucleus; TEF2 has a paralog, TEF1, that arose from the whole genome du…	0	92.796	51	19	49	19	1	458	50	9.04	138.89	19
	Confidence	Sequence	Modifications	Qvality PEP	Qvality q-value	# Protein Groups	# Proteins	# PSMs	Master Protein Accessions	# Missed Cleavages	Theo. MH+ [Da]	Confidence (by Search Engine): Sequest HT	Percolator q-Value (by Search Engine): Sequest HT	Percolator PEP (by Search Engine): Sequest HT	XCorr (by Search Engine): Sequest HT
	High	SHINVVVIGHVDSGK		2.04781e-06	0	1	1	5	YBR118W	0	1560.85	High	0	0.0001409	4.78
	High	FVPSKPMCVEAFSEYPPLGR	1xCarbamidomethyl [C8]; 1xOxidation [M7]	8.74141e-07	0	1	1	2	YBR118W	0	2327.12	High	0	4.886e-05	4.36
	High	VETGVIKPGMVVTFAPAGVTTEVK	1xOxidation [M10]	5.36589e-06	0	1	1	5	YBR118W	0	2446.33	High	0	0.0001197	5.13
	High	VETGVIKPGMVVTFAPAGVTTEVK		1.31464e-05	0	1	1	1	YBR118W	0	2430.33	High	0	0.0001845	4.98
	High	TLLEAIDAIEQPSRPTDKPLR		1.60055e-06	0	1	1	5	YBR118W	0	2363.29	High	0	0.0002869	3.76
	High	YQVTVIDAPGHR		1.36465e-05	0	1	1	3	YBR118W	0	1355.71	High	0	0.0001881	3.15
	High	SVEMHHEQLEQGVPGDNVGFNVK	1xOxidation [M4]	1.39249e-07	0	1	1	2	YBR118W	0	2566.2	High	0	1.959e-05	4.84
	High	SVEMHHEQLEQGVPGDNVGFNVK		1.20196e-05	0	1	1	1	YBR118W	0	2550.2	High	0	0.0001771	3.71
	High	IGGIGTVPVGR		0.000311771	0.000649755	1	1	2	YBR118W	0	1025.61	High	0.0004637	0.000885	2.96
	High	EHALLAFTLGVR		0.00129854	0.000649755	1	1	3	YBR118W	0	1326.75	High	0.0009108	0.002335	3.47
	High	SGDAALVK		0.00621573	0.00106559	1	1	2	YBR118W	0	760.42	High	0.001783	0.01091	2.66
	High	QLIVAVNK		0.00695752	0.00106559	1	1	2	YBR118W	0	884.556	High	0.00103	0.00256	3.71
	High	YAWVLDK		0.0108455	0.00106559	1	1	2	YBR118W	0	894.472	High	0.00279	0.01416	1.82
	High	TLLEAIDAIEQPSRPTDKPLRLPLQDVYK		0.00551178	0.00106559	1	1	1	YBR118W	1	3319.83	High	0.0009108	0.002189	2.87
	High	FVPSKPMCVEAFSEYPPLGR	1xCarbamidomethyl [C8]	0.00227569	0.00106559	1	1	1	YBR118W	0	2311.12	High	0.0008405	0.001383	3.76
	High	FDELLEK		0.00820935	0.00106559	1	1	2	YBR118W	0	893.461	High	0.00103	0.002911	2.46
	High	GCASFNATVIVLNHPGQISAGYSPVLDCHTAHIACR	3xCarbamidomethyl [C2; C28; C35]	0.00733351	0.00106559	1	1	1	YBR118W	0	3893.86	High	0.00103	0.00266	2.12
	High	LPLQDVYK		0.0131913	0.00132229	1	1	4	YBR118W	0	975.551	High	0.001205	0.004393	2.57
	High	ETSNFIK		0.0269633	0.00216078	1	1	2	YBR118W	0	838.431	High	0.001783	0.00951	1.9
	High	VGYNPK		0.0267615	0.00216078	1	1	1	YBR118W	0	677.362	High	0.001783	0.009459	1.91
	High	ETSNFIKK		0.0410094	0.00422195	1	1	1	YBR118W	1	966.525	High	0.003294	0.01588	2
	High	QTVAVGVIK		0.0746089	0.00834875	1	1	1	YBR118W	0	914.567	High	0.006477	0.03504	2.24
High	Master Protein	YBL099W	ATP1 SGDID:S000000195, Chr II from 37053-38690, Genome Release 64-2-1, Verified ORF, "Alpha subunit of the F1 sector of mitochondrial F1F0 ATP synthase; which is a large, evolutionarily conserved enzyme complex required for ATP synthesis; F1 translationally regulates ATP6 and ATP8 expression to achieve a balanced output of ATP synthase genes encoded in nucleus and mitochondria; phosphorylated; N-…	0	91.224	51	27	40	27	1	545	58.6	9.04	108.28	27
	Confidence	Sequence	Modifications	Qvality PEP	Qvality q-value	# Protein Groups	# Proteins	# PSMs	Master Protein Accessions	# Missed Cleavages	Theo. MH+ [Da]	Confidence (by Search Engine): Sequest HT	Percolator q-Value (by Search Engine): Sequest HT	Percolator PEP (by Search Engine): Sequest HT	XCorr (by Search Engine): Sequest HT
	High	EAYPGDVFYLHSR		1.09076e-05	0	1	1	2	YBL099W	0	1553.74	High	0	0.0001689	3.37
	High	HALIVYDDLSK		7.5453e-05	0	1	1	3	YBL099W	0	1273.68	High	0	0.0004163	3.49
	High	GVSDEANLNETGR		0.000140231	0	1	1	1	YBL099W	0	1361.63	High	0	0.0005305	3.24
	High	EVAAFAQFGSDLDASTK		1.86325e-07	0	1	1	2	YBL099W	0	1756.84	High	0	2.263e-05	4.69
	High	IGEFESSFLSYLK		4.40736e-05	0	1	1	1	YBL099W	0	1519.77	High	0	0.0003251	2.49
	High	SNHNELLTEIR		4.1829e-05	0	1	1	2	YBL099W	0	1325.68	High	0	0.0003175	3.71
	High	GIRPAINVGLSVSR		0.000420289	0.000649755	1	1	1	YBL099W	0	1438.85	High	0.0004637	0.000763	3.03
	High	TAVALDTILNQK		0.000672779	0.000649755	1	1	2	YBL099W	0	1286.73	High	0.0009108	0.002411	2.79
	High	TGNIVDVPVGPGLLGR		0.000274604	0.000649755	1	1	3	YBL099W	0	1563.89	High	0.0004637	0.001184	4.09
	High	IKGVSDEANLNETGR		0.00044616	0.000649755	1	1	2	YBL099W	1	1602.81	High	0.0004637	0.0007774	4.2
	High	VVDALGNPIDGKGPIDAAGR		0.00231002	0.00106559	1	1	1	YBL099W	1	1935.03	High	0.0008405	0.001392	2.98
	High	VVDALGNPIDGK		0.00393212	0.00106559	1	1	1	YBL099W	0	1197.65	High	0.0009108	0.001789	2.65
	High	STVAQLVQTLEQHDAMK		0.00660089	0.00106559	1	1	1	YBL099W	0	1898.96	High	0.0009108	0.002464	2.37
	High	GPIDAAGR		0.00456862	0.00106559	1	1	1	YBL099W	0	756.4	High	0.0009108	0.001952	2.5
	High	GMALNLEPGQVGIVLFGSDR	1xOxidation [M2]	0.00293549	0.00106559	1	1	1	YBL099W	0	2089.07	High	0.0009108	0.001551	2.32
	High	AQPTEVSSILEER		0.0125138	0.00132229	1	1	1	YBL099W	0	1458.74	High	0.001205	0.004194	1.84
	High	ELIIGDR		0.0186523	0.00210976	1	1	1	YBL099W	0	815.462	High	0.001767	0.006297	1.94
	High	VLAVGDGIAR		0.0220107	0.00216078	1	1	1	YBL099W	0	970.568	High	0.001783	0.007526	2.12
	High	LFLAQYR		0.0246387	0.00216078	1	1	1	YBL099W	0	910.515	High	0.001783	0.008581	1.69
	High	SVHEPVQTGLK		0.0358499	0.00335822	1	1	2	YBL099W	0	1194.65	High	0.002654	0.01344	2.23
	High	ELLASLK		0.037776	0.00354048	1	1	1	YBL099W	0	773.477	High	0.00279	0.01441	1.76
	High	AVDALVPIGR		0.0372156	0.00354048	1	1	1	YBL099W	0	1010.6	High	0.00279	0.01408	2.31
	High	APGILPR		0.0366633	0.00354048	1	1	2	YBL099W	0	723.451	High	0.00279	0.01391	1.93
	High	LYCVYVAVGQK	1xCarbamidomethyl [C3]	0.0407046	0.00398433	1	1	1	YBL099W	0	1299.68	High	0.003294	0.01586	1.86
	High	VGSAAQVK		0.0472418	0.0050128	1	1	1	YBL099W	0	759.436	High	0.003872	0.01914	2.29
	High	EGELVK		0.0560228	0.00576207	1	1	2	YBL099W	0	674.372	High	0.0054	0.02911	2.06
	High	RSVHEPVQTGLK		0.0589945	0.0063287	1	1	1	YBL099W	1	1350.75	High	0.004998	0.02551	3.21
	High	GMALNLEPGQVGIVLFGSDR		0.0751551	0.00834875	1	1	1	YBL099W	0	2073.08	High	0.006477	0.03523	2.22
High	Master Protein	YOR063W	RPL3 SGDID:S000005589, Chr XV from 444686-445849, Genome Release 64-2-1, Verified ORF, "Ribosomal 60S subunit protein L3; homologous to mammalian ribosomal protein L3 and bacterial L3; plays an important role in function of eIF5B in stimulating 3' end processing of 18S rRNA in context of 80S ribosomes that have not yet engaged in translation; involved in replication and maintenance of killer doub…	0	88.895	54	21	40	21	1	387	43.7	10.29	96.66	21
	Confidence	Sequence	Modifications	Qvality PEP	Qvality q-value	# Protein Groups	# Proteins	# PSMs	Master Protein Accessions	# Missed Cleavages	Theo. MH+ [Da]	Confidence (by Search Engine): Sequest HT	Percolator q-Value (by Search Engine): Sequest HT	Percolator PEP (by Search Engine): Sequest HT	XCorr (by Search Engine): Sequest HT
	High	GDDEANGATSFDR		1.92399e-05	0	1	1	1	YOR063W	0	1354.55	High	0	0.0002213	3.56
	High	SLTTVWAEHLSDEVK		8.03093e-06	0	1	1	2	YOR063W	0	1714.86	High	0	0.0001459	3.94
	High	VACIGAWHPAHVMWSVAR	1xCarbamidomethyl [C3]; 1xOxidation [M13]	7.26878e-05	0	1	1	3	YOR063W	0	2064.01	High	0	0.0004052	3.11
	High	TVAVDSVFEQNEMIDAIAVTK	1xOxidation [M13]	2.73406e-08	0	1	1	1	YOR063W	0	2296.14	High	0	8.713e-06	6.31
	High	TVAVDSVFEQNEMIDAIAVTK		1.56921e-07	0	1	1	1	YOR063W	0	2280.14	High	0	2.076e-05	5.47
	High	SLTTVWAEHLSDEVKR		2.42514e-05	0	1	1	2	YOR063W	1	1870.97	High	0	0.0002473	3.63
	High	KTITPMGGFVHYGEIK	1xOxidation [M6]	0.000693183	0.000649755	1	1	1	YOR063W	1	1793.93	High	0.0004637	0.0008882	3.7
	High	GHGFEGVTHR		0.00144184	0.000649755	1	1	3	YOR063W	0	1096.53	High	0.0004637	0.001149	3.37
	High	YAQDGAGIER		0.00162511	0.000649755	1	1	3	YOR063W	0	1079.51	High	0.0004637	0.001203	2.08
	High	SKPVALTSFLGYK		0.00103768	0.000649755	1	1	1	YOR063W	0	1410.8	High	0.0004637	0.001018	3.01
	High	TITPMGGFVHYGEIK	1xOxidation [M5]	0.000955794	0.000649755	1	1	2	YOR063W	0	1665.83	High	0.0004637	0.0009887	2.72
	High	TITPMGGFVHYGEIK		0.001613	0.000649755	1	1	1	YOR063W	0	1649.84	High	0.0004637	0.0012	2.57
	High	AHLAEIQLNGGSISEK		0.0011695	0.000649755	1	1	1	YOR063W	0	1666.88	High	0.0004637	0.001063	4.27
	High	AGMTTIVR		0.00576586	0.00106559	1	1	1	YOR063W	0	848.466	High	0.0009108	0.002254	2.34
	High	AGMTTIVR	1xOxidation [M3]	0.00555333	0.00106559	1	1	2	YOR063W	0	864.461	High	0.0009108	0.002198	2.57
	High	VLVHTQIR		0.00990866	0.00106559	1	1	1	YOR063W	0	965.589	High	0.00103	0.003401	2.06
	High	VACIGAWHPAHVMWSVAR	1xCarbamidomethyl [C3]	0.00341008	0.00106559	1	1	2	YOR063W	0	2048.01	High	0.0009108	0.001663	2.52
	High	HAFMGTLK		0.00947111	0.00106559	1	1	1	YOR063W	0	904.471	High	0.00103	0.003273	2.41
	High	HGHLGFLPR		0.0118712	0.00132229	1	1	1	YOR063W	0	1033.57	High	0.001205	0.003977	3.07
	High	NDFIMVK	1xOxidation [M5]	0.0201104	0.00210976	1	1	2	YOR063W	0	882.439	High	0.001767	0.006785	2.01
	High	NDFIMVK		0.0259694	0.00216078	1	1	1	YOR063W	0	866.444	High	0.001783	0.00913	1.95
	High	DLDRPGSK		0.0389219	0.00354048	1	1	1	YOR063W	0	887.458	High	0.002962	0.01492	1.9
	High	HAFMGTLK	1xOxidation [M4]	0.0389219	0.00354048	1	1	1	YOR063W	0	920.466	High	0.002962	0.01494	1.81
	High	ALEEVSLK		0.0395075	0.00398433	1	1	1	YOR063W	0	888.504	High	0.003118	0.01525	2.33
	High	FQTPAEK		0.0416257	0.00466421	1	1	2	YOR063W	0	820.42	High	0.007328	0.04426	1.94
	High	KTPLAQK		0.0698593	0.0071867	1	1	1	YOR063W	1	785.488	High	0.005782	0.03202	2.04
	High	WIDTASK		0.0894504	0.00964334	1	1	1	YOR063W	0	820.42	High	0.007424	0.04502	1.35
High	Master Protein	YGR254W	ENO1 SGDID:S000003486, Chr VII from 1000927-1002240, Genome Release 64-2-1, Verified ORF, "Enolase I, a phosphopyruvate hydratase; catalyzes conversion of 2-phosphoglycerate to phosphoenolpyruvate during glycolysis and the reverse reaction during gluconeogenesis; expression repressed in response to glucose; protein abundance increases in response to DNA replication stress; N-terminally propionyla…	0	83.665	53	20	41	7	1	437	46.8	6.62	115.42	20
	Confidence	Sequence	Modifications	Qvality PEP	Qvality q-value	# Protein Groups	# Proteins	# PSMs	Master Protein Accessions	# Missed Cleavages	Theo. MH+ [Da]	Confidence (by Search Engine): Sequest HT	Percolator q-Value (by Search Engine): Sequest HT	Percolator PEP (by Search Engine): Sequest HT	XCorr (by Search Engine): Sequest HT
	High	SGETEDTFIADLVVGLR		0.000209876	0	2	2	3	YGR254W; YHR174W	0	1821.92	High	0	0.0006141	3.57
	High	IGLDCASSEFFK	1xCarbamidomethyl [C5]	0.000123513	0	2	2	1	YGR254W; YHR174W	0	1373.64	High	0	0.000505	2.73
	High	SIVPSGASTGVHEALEMR		1.43094e-06	0	2	2	1	YGR254W; YHR174W	0	1840.92	High	0	6.234e-05	3.75
	High	VNQIGTLSESIK		8.69548e-05	0	2	2	3	YGR254W; YHR174W	0	1288.71	High	0	0.0004372	3.31
	High	AVDDFLLSLDGTANK		3.05009e-07	0	2	2	10	YGR254W; YHR174W	0	1578.8	High	0	2.895e-05	5.02
	High	TAGIQIVADDLTVTNPK		2.76065e-06	0	1	1	2	YGR254W	0	1755.95	High	0	8.629e-05	4.37
	High	SIVPSGASTGVHEALEMR	1xOxidation [M17]	5.38002e-07	0	2	2	2	YGR254W; YHR174W	0	1856.92	High	0	3.833e-05	3.82
	High	IEEELGDNAVFAGENFHHGDKL		0.000491643	0.000649755	1	1	2	YGR254W	1	2441.14	High	0.0004637	0.0008004	4.85
	High	GNPTVEVELTTEK		0.000318834	0.000649755	2	2	3	YGR254W; YHR174W	0	1416.72	High	0.0004637	0.0007031	3.64
	High	WLTGPQLADLYHSLMK	1xOxidation [M15]	0.000272561	0.000649755	1	1	1	YGR254W	0	1888.96	High	0.0004637	0.0006691	2.56
	High	IGSEVYHNLK		0.000338459	0.000649755	2	2	3	YGR254W; YHR174W	0	1159.61	High	0.0004637	0.0007153	3.41
	High	NVNDVIAPAFVK		0.0051516	0.00106559	1	1	1	YGR254W	0	1286.71	High	0.0009108	0.002094	2.79
	High	AADALLLK		0.00925965	0.00106559	2	2	2	YGR254W; YHR174W	0	814.503	High	0.00103	0.003202	1.98
	High	DGKYDLDFK		0.00925965	0.00106559	2	2	2	YGR254W; YHR174W	1	1100.53	High	0.006561	0.03605	2.84
	High	HLADLSK		0.00827134	0.00106559	1	1	1	YGR254W	0	783.436	High	0.00103	0.002925	2.42
	High	LGANAILGVSLAASR		0.0159243	0.00191257	1	1	1	YGR254W	0	1412.82	High	0.001627	0.005312	2.8
	High	IATAIEK		0.0218457	0.00216078	2	2	1	YGR254W; YHR174W	0	745.445	High	0.001783	0.007474	2.58
	High	LNQLLR		0.0353175	0.00335822	2	2	2	YGR254W; YHR174W	0	756.473	High	0.002654	0.01328	2.03
	High	KAADALLLK		0.042251	0.00466421	2	2	2	YGR254W; YHR174W	1	942.598	High	0.003615	0.01658	2.92
	High	GVLHAVK		0.0435293	0.00489376	1	1	1	YGR254W	0	723.451	High	0.003787	0.01715	1.71
	High	ANLDVK		0.0862771	0.0093556	2	2	4	YGR254W; YHR174W	0	659.372	High	0.00867	0.06212	1.89
High	Master Protein	YOR310C	NOP58 SGDID:S000005837, Chr XV from 898360-896825, Genome Release 64-2-1, reverse complement, Verified ORF, "Protein involved in producing mature rRNAs and snoRNAs; involved in pre-rRNA processing, 18S rRNA synthesis, and snoRNA synthesis; component of the small subunit processome complex, which is required for processing of pre-18S rRNA"	0	82.283	47	23	33	22	1	511	56.9	8.94	90.9	23
	Confidence	Sequence	Modifications	Qvality PEP	Qvality q-value	# Protein Groups	# Proteins	# PSMs	Master Protein Accessions	# Missed Cleavages	Theo. MH+ [Da]	Confidence (by Search Engine): Sequest HT	Percolator q-Value (by Search Engine): Sequest HT	Percolator PEP (by Search Engine): Sequest HT	XCorr (by Search Engine): Sequest HT
	High	FNSAANALEEANSIIEGK		6.64577e-05	0	1	1	2	YOR310C	0	1877.92	High	0	0.0003899	4.55
	High	LIAHSGSLISLAK		8.91597e-06	0	1	1	1	YOR310C	0	1309.78	High	0	0.0001533	4.48
	High	EWYGWHFPELAK		0.000161607	0	2	2	1	YOR310C; YLR197W	0	1562.74	High	0	0.0005596	2.99
	High	YGLLYHASLVGQATGK		7.71954e-08	0	1	1	1	YOR310C	0	1677.9	High	0	1.461e-05	5.81
	High	AIAPNLTQLVGELVGAR		4.40923e-08	0	1	1	2	YOR310C	0	1721.99	High	0	1.105e-05	5.6
	High	SPASTIQILGAEK		0.000171555	0	1	1	2	YOR310C	0	1314.73	High	0	0.0005724	3.65
	High	DDSGDIGLESR		0.000101718	0	1	1	1	YOR310C	0	1163.52	High	0	0.0004662	3.37
	High	SSSLIQDLDSSDK		1.18414e-05	0	1	1	1	YOR310C	0	1394.66	High	0	0.0001756	3.01
	High	YDALAEDRDDSGDIGLESR		0.00164961	0.000649755	1	1	1	YOR310C	1	2096.94	High	0.0004637	0.00121	3.56
	High	MSLGLAHSIGR		0.000619715	0.000649755	1	1	2	YOR310C	0	1141.61	High	0.0004637	0.0008592	3
	High	MSLGLAHSIGR	1xOxidation [M1]	0.000452873	0.000649755	1	1	1	YOR310C	0	1157.61	High	0.0004637	0.000781	2.43
	High	AYNADADTAK		0.000562376	0.000649755	1	1	1	YOR310C	0	1039.47	High	0.0004637	0.0008336	2.7
	High	IVTDSVAYAR		0.00820935	0.00106559	1	1	1	YOR310C	0	1094.58	High	0.00103	0.002905	2.51
	High	YDALAEDR		0.00551178	0.00106559	1	1	1	YOR310C	0	952.437	High	0.0009108	0.002182	2.11
	High	STLIVSETK		0.00460303	0.00106559	1	1	1	YOR310C	0	977.551	High	0.0009108	0.001955	2.19
	High	ASETDLSEILPEEIEER		0.00211159	0.00106559	1	1	2	YOR310C	0	1959.94	High	0.001767	0.005704	2.42
	High	IILTMGIR	1xOxidation [M5]	0.0145482	0.00132229	1	1	2	YOR310C	0	932.56	High	0.001783	0.007483	2.18
	High	CKEWYGWHFPELAK	1xCarbamidomethyl [C1]	0.0250118	0.00216078	1	1	1	YOR310C	1	1850.87	High	0.001783	0.008699	2.64
	High	EQLSNYLSAR		0.0218457	0.00216078	1	1	1	YOR310C	0	1180.6	High	0.001783	0.007491	2.45
	High	EYLPELLPGMSDNDLSK		0.0340203	0.00314891	1	1	1	YOR310C	0	1920.93	High	0.002654	0.01261	2.28
	High	LSQLEGR		0.0389219	0.00354048	1	1	1	YOR310C	0	802.442	High	0.002962	0.01493	1.78
	High	EYLPELLPGMSDNDLSK	1xOxidation [M10]	0.0458575	0.0050128	1	1	2	YOR310C	0	1936.92	High	0.003872	0.01842	2.22
	High	LANAINK		0.0568568	0.0063287	1	1	1	YOR310C	0	743.441	High	0.004998	0.02432	2.5
	High	IILTMGIR		0.0698593	0.0071867	1	1	1	YOR310C	0	916.565	High	0.005782	0.03191	1.81
	High	LLEEIKK		0.0724614	0.00834875	1	1	1	YOR310C	1	872.545	High	0.006477	0.03362	2.34
	High	AAVSLR		0.0785126	0.00846887	1	1	1	YOR310C	0	616.378	High	0.006561	0.03743	1.73
High	Master Protein	YBR143C	SUP45 SGDID:S000000347, Chr II from 532182-530869, Genome Release 64-2-1, reverse complement, Verified ORF, "Polypeptide release factor (eRF1) in translation termination; mutant form acts as a recessive omnipotent suppressor; methylated by Mtq2p-Trm112p in ternary complex eRF1-eRF3-GTP; mutation of methylation site confers resistance to zymocin; has a role in cytokinesis through interaction with …	0	80.666	55	25	32	25	1	437	49	5.05	79.2	25
	Confidence	Sequence	Modifications	Qvality PEP	Qvality q-value	# Protein Groups	# Proteins	# PSMs	Master Protein Accessions	# Missed Cleavages	Theo. MH+ [Da]	Confidence (by Search Engine): Sequest HT	Percolator q-Value (by Search Engine): Sequest HT	Percolator PEP (by Search Engine): Sequest HT	XCorr (by Search Engine): Sequest HT
	High	MLTDEYGTASNIK	1xOxidation [M1]	5.04143e-05	0	1	1	1	YBR143C	0	1458.68	High	0	0.0003455	3.33
	High	MLTDEYGTASNIK		3.03408e-05	0	1	1	1	YBR143C	0	1442.68	High	0	0.0002746	3.12
	High	ATGQEMDVVSEEPLIEWLAANYK	1xOxidation [M6]	1.3545e-05	0	1	1	1	YBR143C	0	2609.24	High	0	0.0001874	4.3
	High	SSEGAQFVTGFGGIGAMLR	1xOxidation [M17]	0.000119879	0	1	1	3	YBR143C	0	1900.92	High	0	0.0004991	4.16
	High	VTFDIEPYKPINTSLYLCDNK	1xCarbamidomethyl [C18]	0.000343552	0.000649755	1	1	1	YBR143C	0	2530.25	High	0.0004637	0.0007192	2.72
	High	LSVLSAITSTQQK		0.000677823	0.000649755	1	1	2	YBR143C	0	1375.78	High	0.0004637	0.000884	3.08
	High	NFGATLEFITDK		0.00132799	0.000649755	1	1	1	YBR143C	0	1355.68	High	0.0004637	0.001115	3
	High	VAEVAVQNFITNDKVNVK		0.000643295	0.000649755	1	1	1	YBR143C	1	1988.08	High	0.0004637	0.0008687	3.24
	High	VAEVAVQNFITNDK		0.00124157	0.000649755	1	1	1	YBR143C	0	1547.81	High	0.0004637	0.001085	3.19
	High	LIVFENLETIR		0.000841782	0.000649755	1	1	1	YBR143C	0	1346.77	High	0.0004637	0.0009467	2.19
	High	FHTEVLSELLQADDK		0.00147455	0.000649755	1	1	2	YBR143C	0	1744.88	High	0.0004637	0.001159	3.68
	High	LYNTLPK		0.00919023	0.00106559	1	1	1	YBR143C	0	848.488	High	0.00103	0.003179	2.28
	High	ALDLGAVEK		0.0047433	0.00106559	1	1	1	YBR143C	0	915.515	High	0.0009108	0.001993	2.85
	High	SSEGAQFVTGFGGIGAMLR		0.00402159	0.00106559	1	1	1	YBR143C	0	1884.93	High	0.0009108	0.001811	3.06
	High	KVTFDIEPYKPINTSLYLCDNK	1xCarbamidomethyl [C19]	0.0024343	0.00106559	1	1	1	YBR143C	1	2658.35	High	0.0009108	0.001425	3.93
	High	KVAEVAVQNFITNDKVNVK		0.00302479	0.00106559	1	1	2	YBR143C	2	2116.18	High	0.0009108	0.001573	4.09
	High	KLLEAYFDEISQDTGK		0.00258456	0.00106559	1	1	1	YBR143C	1	1856.93	High	0.0009108	0.001461	3.17
	High	LLEAYFDEISQDTGK		0.00254615	0.00106559	1	1	1	YBR143C	0	1728.83	High	0.0009108	0.001451	2.42
	High	FCYGIDDTLK	1xCarbamidomethyl [C2]	0.00214343	0.00106559	1	1	1	YBR143C	0	1231.57	High	0.0008405	0.00135	1.97
	High	SELFDPR		0.0215195	0.00216078	1	1	1	YBR143C	0	863.426	High	0.001783	0.007345	1.75
	High	FAEPEAK		0.0380594	0.00354048	1	1	1	YBR143C	0	791.393	High	0.00279	0.01451	1.42
	High	GQIPLYQK		0.0461998	0.0050128	1	1	1	YBR143C	0	946.536	High	0.003872	0.0186	1.88
	High	LVQSLEK		0.0451802	0.0050128	1	1	1	YBR143C	0	816.483	High	0.003872	0.01808	1.49
	High	FTVDLPK		0.0486667	0.00523344	1	1	1	YBR143C	0	819.461	High	0.004036	0.01976	1.93
	High	DAEDNEVIK		0.0621172	0.00669503	1	1	1	YBR143C	0	1032.48	High	0.005278	0.02737	1.58
	High	KLVQSLEK		0.0703725	0.00739284	1	1	1	YBR143C	1	944.578	High	0.005782	0.03211	1.69
	High	NIEIWK		0.0735277	0.00834875	1	1	1	YBR143C	0	802.446	High	0.006477	0.03435	1.4
High	Master Protein	YDL229W	SSB1 SGDID:S000002388, Chr IV from 44065-45906, Genome Release 64-2-1, Verified ORF, "Cytoplasmic ATPase that is a ribosome-associated molecular chaperone; functions with J-protein partner Zuo1p; may be involved in folding of newly-made polypeptide chains; member of the HSP70 family; interacts with phosphatase subunit Reg1p; SSB1 has a paralog, SSB2, that arose from the whole genome duplication"	0	78.736	50	23	30	2	1	613	66.6	5.44	73.13	23
	Confidence	Sequence	Modifications	Qvality PEP	Qvality q-value	# Protein Groups	# Proteins	# PSMs	Master Protein Accessions	# Missed Cleavages	Theo. MH+ [Da]	Confidence (by Search Engine): Sequest HT	Percolator q-Value (by Search Engine): Sequest HT	Percolator PEP (by Search Engine): Sequest HT	XCorr (by Search Engine): Sequest HT
	High	IINEPTAAAIAYGLGAGK		1.66581e-07	0	2	2	2	YNL209W; YDL229W	0	1729.95	High	0	2.142e-05	5.25
	High	FEDLNAALFK		0.000233004	0	2	2	1	YNL209W; YDL229W	0	1167.6	High	0.0004637	0.0006369	3.01
	High	TFSPQEISAMVLTK		1.56098e-05	0	2	2	1	YNL209W; YDL229W	0	1551.81	High	0	0.0002007	2.89
	High	VIDVDGNPVIEVQYLEETK		4.88229e-07	0	2	2	1	YNL209W; YDL229W	0	2160.11	High	0	3.658e-05	4.33
	High	STSGNTHLGGQDFDTNLLEHFK		2.67236e-05	0	2	2	2	YNL209W; YDL229W	0	2418.13	High	0	0.0002582	3.88
	High	DAGAISGLNVLR		0.000153377	0	2	2	1	YNL209W; YDL229W	0	1185.66	High	0	0.0005488	3.21
	High	VTPSFVAFTPEER		0.000370186	0.000649755	1	1	1	YDL229W	0	1479.75	High	0.0004637	0.0007354	3.01
	High	TGLDISDDAR		0.000549917	0.000649755	2	2	1	YNL209W; YDL229W	0	1062.51	High	0.0004637	0.000827	3.3
	High	MVNQAEEFK		0.000934607	0.000649755	2	2	1	YNL209W; YDL229W	0	1095.51	High	0.0004637	0.0009819	2.6
	High	STLEPVEQVLK		0.00158905	0.000649755	2	2	1	YNL209W; YDL229W	0	1242.69	High	0.0004637	0.001194	2.35
	High	AVITVPAYFNDAQR		0.000970186	0.000649755	2	2	2	YNL209W; YDL229W	0	1564.81	High	0.0004637	0.000995	2.93
	High	ENTLLGEFDLK		0.00121404	0.000649755	2	2	1	YNL209W; YDL229W	0	1278.66	High	0.0004637	0.001077	2.43
	High	LSSEEIEK		0.00947111	0.00106559	2	2	1	YNL209W; YDL229W	0	934.473	High	0.00103	0.003265	1.99
	High	AADEAFAK		0.00983435	0.00106559	2	2	1	YNL209W; YDL229W	0	822.399	High	0.00103	0.003362	1.99
	High	SINPDEAVAYGAAVQGAILTGQSTSDETK		0.00519042	0.00106559	2	2	1	YNL209W; YDL229W	0	2893.41	High	0.0009108	0.002108	2.5
	High	TFTTCADNQTTVQFPVYQGER	1xCarbamidomethyl [C5]	0.00297981	0.00106559	1	1	1	YDL229W	0	2463.12	High	0.0009108	0.00156	2.67
	High	TFSPQEISAMVLTK	1xOxidation [M10]	0.00364807	0.00106559	2	2	2	YNL209W; YDL229W	0	1567.8	High	0.0009108	0.001721	2.99
	High	LLSDFFDGK		0.00316387	0.00106559	2	2	2	YNL209W; YDL229W	0	1041.53	High	0.0009108	0.001604	2.2
	High	RFDDESVQK		0.0153358	0.00162885	2	2	1	YNL209W; YDL229W	1	1123.54	High	0.001424	0.005111	2.94
	High	IEAALSDALAALQIEDPSADELR		0.0169131	0.00191257	2	2	1	YNL209W; YDL229W	0	2411.23	High	0.001627	0.005638	2.81
	High	SSNITISNAVGR		0.0232005	0.00216078	2	2	1	YNL209W; YDL229W	0	1218.64	High	0.001783	0.00796	2.01
	High	LIGDAAK		0.0404021	0.00398433	6	7	1	YAL005C; YNL209W; YJL034W; YER103W; YLL024C; YDL229W	0	687.404	High	0.003118	0.01563	1.89
	High	NTVFDAK		0.0401017	0.00398433	2	2	1	YNL209W; YDL229W	0	794.404	High	0.003118	0.01552	1.53
	High	NTTVPTIK		0.0472418	0.0050128	2	2	1	YNL209W; YDL229W	0	873.504	High	0.003872	0.01905	1.61
	High	MVNQAEEFK	1xOxidation [M1]	0.0472418	0.0050128	2	2	1	YNL209W; YDL229W	0	1111.51	High	0.003872	0.01909	1.21
High	Master Protein	YEL013W	VAC8 SGDID:S000000739, Chr V from 128825-130561, Genome Release 64-2-1, Verified ORF, "Phosphorylated and palmitoylated vacuolar membrane protein; interacts with Atg13p, required for the cytoplasm-to-vacuole targeting (Cvt) pathway; interacts with Nvj1p to form nucleus-vacuole junctions"	0	77.538	43	21	31	21	1	578	63.2	5.14	79.24	21
	Confidence	Sequence	Modifications	Qvality PEP	Qvality q-value	# Protein Groups	# Proteins	# PSMs	Master Protein Accessions	# Missed Cleavages	Theo. MH+ [Da]	Confidence (by Search Engine): Sequest HT	Percolator q-Value (by Search Engine): Sequest HT	Percolator PEP (by Search Engine): Sequest HT	XCorr (by Search Engine): Sequest HT
	High	SAALAFAEITEK		2.51739e-05	0	1	1	1	YEL013W	0	1250.66	High	0	0.0002517	4.03
	High	DSEEIQCHAVSTLR	1xCarbamidomethyl [C7]	8.63079e-05	0	1	1	2	YEL013W	0	1644.76	High	0	0.0004364	2.88
	High	LLDYKDSEEIQCHAVSTLR	1xCarbamidomethyl [C12]	0.00010021	0	1	1	1	YEL013W	1	2277.12	High	0	0.0004645	2.55
	High	IATSGALIPLTK		0.00135811	0.000649755	1	1	1	YEL013W	0	1184.72	High	0.0004637	0.001123	3.25
	High	LVSLMDSPSSR	1xOxidation [M5]	0.000615103	0.000649755	1	1	2	YEL013W	0	1207.6	High	0.0004637	0.0008555	2.73
	High	NATGALLNMTHSEENRK		0.000554039	0.000649755	1	1	2	YEL013W	1	1885.92	High	0.0004637	0.001011	2.89
	High	NATGALLNMTHSEENRK	1xOxidation [M9]	0.000835517	0.000649755	1	1	2	YEL013W	1	1901.91	High	0.0004637	0.0009452	3.83
	High	LIQSDSIPLVLASVACIR	1xCarbamidomethyl [C16]	0.00105331	0.000649755	1	1	2	YEL013W	0	1955.1	High	0.0004637	0.001024	4.26
	High	DQLDFYSGGPLK		0.000730392	0.000649755	1	1	1	YEL013W	0	1339.65	High	0.0004637	0.0009034	2.86
	High	EFFESGAVEK		0.000977463	0.000649755	1	1	1	YEL013W	0	1142.54	High	0.0004637	0.000996	3.01
	High	NLASDTSYQLEIVR		0.00309354	0.00106559	1	1	2	YEL013W	0	1608.82	High	0.0009108	0.001893	3.22
	High	NISIHPLNEGLIVDAGFLKPLVR		0.00215953	0.00106559	1	1	2	YEL013W	0	2515.44	High	0.0009108	0.001588	3.51
	High	NDDDIINGVR		0.00481504	0.00106559	1	1	1	YEL013W	0	1130.54	High	0.0009108	0.002011	2.76
	High	MADVTFER	1xOxidation [M1]	0.00280649	0.00106559	1	1	1	YEL013W	0	984.446	High	0.0009108	0.001518	2.32
	High	IIEAWDRPNEGIR		0.00522954	0.00106559	1	1	1	YEL013W	0	1568.82	High	0.0009108	0.002111	2.69
	High	DSSDEASVSPIADNER		0.0130923	0.00132229	1	1	1	YEL013W	0	1691.74	High	0.001205	0.00436	2.16
	High	EAVTLLLGYLEDK		0.0127037	0.00132229	1	1	1	YEL013W	0	1463.8	High	0.001205	0.004236	1.85
	High	NLAASSEK		0.0123267	0.00132229	1	1	2	YEL013W	0	819.421	High	0.001205	0.004334	2.15
	High	CQATLALR	1xCarbamidomethyl [C1]	0.0160447	0.00191257	1	1	1	YEL013W	0	932.498	High	0.001627	0.005353	1.83
	High	ALTTLVYSDNLNLQR		0.0221768	0.00216078	1	1	2	YEL013W	0	1720.92	High	0.001783	0.009519	2.93
	High	KLAQTEPR		0.0465447	0.0050128	1	1	1	YEL013W	1	942.537	High	0.003872	0.01868	1.95
	High	LAQTEPR		0.077378	0.00846887	1	1	1	YEL013W	0	814.442	High	0.006561	0.03677	1.55
High	Master Protein	IPI00217963 IPI:IPI00217963.2	SWISS-PROT:P08779 TREMBL:Q16195|REFSEQ_NP:NP_005548|ENSEMBL:ENSP00000301653 Tax_Id=9606 Keratin, type I cytoskeletal 16	0	76.802	60	26	60	13	1	472	51.1	5.05	142.79	26
	Confidence	Sequence	Modifications	Qvality PEP	Qvality q-value	# Protein Groups	# Proteins	# PSMs	Master Protein Accessions	# Missed Cleavages	Theo. MH+ [Da]	Confidence (by Search Engine): Sequest HT	Percolator q-Value (by Search Engine): Sequest HT	Percolator PEP (by Search Engine): Sequest HT	XCorr (by Search Engine): Sequest HT
	High	ISSVLAGGSCR	1xCarbamidomethyl [C10]	0.000191888	0	2	2	1	IPI00384444 IPI:IPI00384444.4; IPI00217963 IPI:IPI00217963.2	0	1106.56	High	0	0.0005958	2.97
	High	IIAATIENAQPILQIDNAR		0.000224466	0	1	1	1	IPI00217963 IPI:IPI00217963.2	0	2064.14	High	0	0.0006278	3.53
	High	APSTYGGGLSVSSR		2.30769e-06	0	1	1	1	IPI00217963 IPI:IPI00217963.2	0	1338.66	High	0	7.904e-05	3.22
	High	VLQGLEIELQSQLSMK	1xOxidation [M15]	0.000155685	0	1	1	1	IPI00217963 IPI:IPI00217963.2	0	1831.98	High	0	0.0005518	3.58
	High	VTMQNLNDR	1xOxidation [M3]	0.000361986	0.000649755	6	8	20	IPI00295684 IPI:IPI00295684.1; IPI00384444 IPI:IPI00384444.4; IPI00328103 IPI:IPI00328103.1; IPI00383111 IPI:IPI00383111.1; IPI00375911 IPI:IPI00375911.1; IPI00217963 IPI:IPI00217963.2	0	1106.53	High	0.0004637	0.001192	2.91
	High	VTMQNLNDR		0.00151932	0.000649755	6	8	3	IPI00295684 IPI:IPI00295684.1; IPI00384444 IPI:IPI00384444.4; IPI00328103 IPI:IPI00328103.1; IPI00383111 IPI:IPI00383111.1; IPI00375911 IPI:IPI00375911.1; IPI00217963 IPI:IPI00217963.2	0	1090.53	High	0.0004637	0.001173	2.6
	High	VLDELTLAR		0.00102229	0.000649755	4	8	2	IPI00384444 IPI:IPI00384444.4; IPI00217963 IPI:IPI00217963.2; IPI00450768 IPI:IPI00450768.4; IPI00290077 IPI:IPI00290077.1	0	1029.59	High	0.0004637	0.001013	2.98
	High	TDLEMQIEGLKEELAYLR	1xOxidation [M5]	0.0015538	0.000649755	1	1	1	IPI00217963 IPI:IPI00217963.2	1	2167.1	High	0.0004637	0.001183	3.72
	High	TRLEQEIATYR		0.0015538	0.000649755	4	8	2	IPI00384444 IPI:IPI00384444.4; IPI00217963 IPI:IPI00217963.2; IPI00450768 IPI:IPI00450768.4; IPI00290077 IPI:IPI00290077.1	1	1379.73	High	0.0004637	0.001182	3.65
	High	LLEGEDAHLSSQQASGQSYSSR		0.00136831	0.000649755	1	1	1	IPI00217963 IPI:IPI00217963.2	0	2350.09	High	0.0004637	0.001128	3.14
	High	QFTSSSSMK	1xOxidation [M8]	0.00121404	0.000649755	2	2	2	IPI00384444 IPI:IPI00384444.4; IPI00217963 IPI:IPI00217963.2	0	1018.45	High	0.0004637	0.001077	2.76
	High	ASLENSLEETKGR		0.000562376	0.000649755	2	2	1	IPI00384444 IPI:IPI00384444.4; IPI00217963 IPI:IPI00217963.2	1	1433.72	High	0.0004637	0.0008337	3.24
	High	ASLENSLEETK		0.000558192	0.000649755	2	2	1	IPI00384444 IPI:IPI00384444.4; IPI00217963 IPI:IPI00217963.2	0	1220.6	High	0.0004637	0.000832	2.18
	High	QTVEADVNGLR		0.00236248	0.00106559	1	1	1	IPI00217963 IPI:IPI00217963.2	0	1201.62	High	0.0008405	0.001405	2.48
	High	ALEEANADLEVK		0.00203404	0.00106559	3	7	1	IPI00384444 IPI:IPI00384444.4; IPI00217963 IPI:IPI00217963.2; IPI00290077 IPI:IPI00290077.1	0	1301.66	High	0.0008405	0.001319	2.16
	High	TKYEHELALR		0.00443353	0.00106559	1	1	1	IPI00217963 IPI:IPI00217963.2	1	1259.67	High	0.0009108	0.001918	2.26
	High	LAADDFR		0.00784707	0.00106559	7	27	5	IPI00295684 IPI:IPI00295684.1; IPI00384444 IPI:IPI00384444.4; IPI00383111 IPI:IPI00383111.1; sp; IPI00217963 IPI:IPI00217963.2; IPI00450768 IPI:IPI00450768.4; IPI00290077 IPI:IPI00290077.1	0	807.4	High	0.00416	0.02124	2.21
	High	LASYLDK		0.00680237	0.00106559	7	14	6	IPI00295684 IPI:IPI00295684.1; IPI00384444 IPI:IPI00384444.4; IPI00383111 IPI:IPI00383111.1; IPI00217963 IPI:IPI00217963.2; IPI00450768 IPI:IPI00450768.4; IPI00290077 IPI:IPI00290077.1; IPI00019359 IPI:IPI00019359.2	0	809.44	High	0.001955	0.0117	2.31
	High	GSCGIGGGIGGGSSR	1xPhospho [S2(100)]	0.00940009	0.00106559	2	2	1	IPI00384444 IPI:IPI00384444.4; IPI00217963 IPI:IPI00217963.2	0	1301.53	High	0.00103	0.003237	3.11
	High	GQTGGDVNVEMDAAPGVDLSR	1xOxidation [M11]	0.0125138	0.00132229	1	1	1	IPI00217963 IPI:IPI00217963.2	0	2103.96	High	0.001205	0.004191	3.47
	High	DYSPYFK		0.018099	0.00210976	2	3	1	IPI00384444 IPI:IPI00384444.4; IPI00217963 IPI:IPI00217963.2	0	919.42	High	0.001767	0.00606	2.29
	High	DAETWFLSK		0.0226829	0.00216078	1	1	1	IPI00217963 IPI:IPI00217963.2	0	1096.53	High	0.001783	0.007806	2.12
	High	SEVTELR		0.0273713	0.00216078	1	1	1	IPI00217963 IPI:IPI00217963.2	0	833.436	High	0.001783	0.00969	1.89
	High	EVFTSSSSSSSR		0.0269633	0.00216078	1	1	1	IPI00217963 IPI:IPI00217963.2	0	1260.57	High	0.001783	0.009562	1.47
	High	LASYLDKVR		0.0416257	0.00466421	6	11	1	IPI00295684 IPI:IPI00295684.1; IPI00384444 IPI:IPI00384444.4; IPI00383111 IPI:IPI00383111.1; IPI00217963 IPI:IPI00217963.2; IPI00450768 IPI:IPI00450768.4; IPI00290077 IPI:IPI00290077.1	1	1064.61	High	0.003615	0.01631	2.06
	High	EVASNSELVQSSR		0.0560228	0.00576207	1	1	1	IPI00217963 IPI:IPI00217963.2	0	1405.69	High	0.00491	0.02384	1.33
	High	SEVTELRR		0.0653979	0.00687016	1	1	1	IPI00217963 IPI:IPI00217963.2	1	989.537	High	0.00553	0.02924	2.32
High	Master Protein	YNL209W	SSB2 SGDID:S000005153, Chr XIV from 252059-253900, Genome Release 64-2-1, Verified ORF, "Cytoplasmic ATPase that is a ribosome-associated molecular chaperone; functions with J-protein partner Zuo1p; may be involved in the folding of newly-synthesized polypeptide chains; member of the HSP70 family; SSB2 has a paralog, SSB1, that arose from the whole genome duplication"	0	74.271	47	22	29	1	1	613	66.6	5.49	67.46	22
	Confidence	Sequence	Modifications	Qvality PEP	Qvality q-value	# Protein Groups	# Proteins	# PSMs	Master Protein Accessions	# Missed Cleavages	Theo. MH+ [Da]	Confidence (by Search Engine): Sequest HT	Percolator q-Value (by Search Engine): Sequest HT	Percolator PEP (by Search Engine): Sequest HT	XCorr (by Search Engine): Sequest HT
	High	IINEPTAAAIAYGLGAGK		1.66581e-07	0	2	2	2	YNL209W; YDL229W	0	1729.95	High	0	2.142e-05	5.25
	High	FEDLNAALFK		0.000233004	0	2	2	1	YNL209W; YDL229W	0	1167.6	High	0.0004637	0.0006369	3.01
	High	TFSPQEISAMVLTK		1.56098e-05	0	2	2	1	YNL209W; YDL229W	0	1551.81	High	0	0.0002007	2.89
	High	VIDVDGNPVIEVQYLEETK		4.88229e-07	0	2	2	1	YNL209W; YDL229W	0	2160.11	High	0	3.658e-05	4.33
	High	STSGNTHLGGQDFDTNLLEHFK		2.67236e-05	0	2	2	2	YNL209W; YDL229W	0	2418.13	High	0	0.0002582	3.88
	High	DAGAISGLNVLR		0.000153377	0	2	2	1	YNL209W; YDL229W	0	1185.66	High	0	0.0005488	3.21
	High	TGLDISDDAR		0.000549917	0.000649755	2	2	1	YNL209W; YDL229W	0	1062.51	High	0.0004637	0.000827	3.3
	High	MVNQAEEFK		0.000934607	0.000649755	2	2	1	YNL209W; YDL229W	0	1095.51	High	0.0004637	0.0009819	2.6
	High	STLEPVEQVLK		0.00158905	0.000649755	2	2	1	YNL209W; YDL229W	0	1242.69	High	0.0004637	0.001194	2.35
	High	AVITVPAYFNDAQR		0.000970186	0.000649755	2	2	2	YNL209W; YDL229W	0	1564.81	High	0.0004637	0.000995	2.93
	High	ENTLLGEFDLK		0.00121404	0.000649755	2	2	1	YNL209W; YDL229W	0	1278.66	High	0.0004637	0.001077	2.43
	High	LSSEEIEK		0.00947111	0.00106559	2	2	1	YNL209W; YDL229W	0	934.473	High	0.00103	0.003265	1.99
	High	AADEAFAK		0.00983435	0.00106559	2	2	1	YNL209W; YDL229W	0	822.399	High	0.00103	0.003362	1.99
	High	SINPDEAVAYGAAVQGAILTGQSTSDETK		0.00519042	0.00106559	2	2	1	YNL209W; YDL229W	0	2893.41	High	0.0009108	0.002108	2.5
	High	TFSPQEISAMVLTK	1xOxidation [M10]	0.00364807	0.00106559	2	2	2	YNL209W; YDL229W	0	1567.8	High	0.0009108	0.001721	2.99
	High	LLSDFFDGK		0.00316387	0.00106559	2	2	2	YNL209W; YDL229W	0	1041.53	High	0.0009108	0.001604	2.2
	High	RFDDESVQK		0.0153358	0.00162885	2	2	1	YNL209W; YDL229W	1	1123.54	High	0.001424	0.005111	2.94
	High	IEAALSDALAALQIEDPSADELR		0.0169131	0.00191257	2	2	1	YNL209W; YDL229W	0	2411.23	High	0.001627	0.005638	2.81
	High	SSNITISNAVGR		0.0232005	0.00216078	2	2	1	YNL209W; YDL229W	0	1218.64	High	0.001783	0.00796	2.01
	High	LIGDAAK		0.0404021	0.00398433	6	7	1	YAL005C; YNL209W; YJL034W; YER103W; YLL024C; YDL229W	0	687.404	High	0.003118	0.01563	1.89
	High	NTVFDAK		0.0401017	0.00398433	2	2	1	YNL209W; YDL229W	0	794.404	High	0.003118	0.01552	1.53
	High	NTTVPTIK		0.0472418	0.0050128	2	2	1	YNL209W; YDL229W	0	873.504	High	0.003872	0.01905	1.61
	High	MVNQAEEFK	1xOxidation [M1]	0.0472418	0.0050128	2	2	1	YNL209W; YDL229W	0	1111.51	High	0.003872	0.01909	1.21
	High	TFTTVSDNQTTVQFPVYQGER		0.0724614	0.00834875	1	1	1	YNL209W	0	2418.16	High	0.006477	0.03347	1.81
High	Master Protein	YMR290C	HAS1 SGDID:S000004903, Chr XIII from 851591-850074, Genome Release 64-2-1, reverse complement, Verified ORF, "ATP-dependent RNA helicase; involved in the biogenesis of 40S and 60S ribosome subunits; localizes to both the nuclear periphery and nucleolus; highly enriched in nuclear pore complex fractions; constituent of 66S pre-ribosomal particles"	0	69.967	46	21	31	21	1	505	56.7	9.33	70.73	21
	Confidence	Sequence	Modifications	Qvality PEP	Qvality q-value	# Protein Groups	# Proteins	# PSMs	Master Protein Accessions	# Missed Cleavages	Theo. MH+ [Da]	Confidence (by Search Engine): Sequest HT	Percolator q-Value (by Search Engine): Sequest HT	Percolator PEP (by Search Engine): Sequest HT	XCorr (by Search Engine): Sequest HT
	High	MGFTTMTSVQAR	2xOxidation [M1; M6]	1.73757e-06	0	1	1	1	YMR290C	0	1361.62	High	0	6.862e-05	3.67
	High	QSMLFSATQTTK	1xOxidation [M3]	0.000175442	0	1	1	1	YMR290C	0	1358.66	High	0	0.0005764	2.88
	High	ILEIGFEDEMR	1xOxidation [M10]	0.000196235	0	1	1	1	YMR290C	0	1367.65	High	0	0.0006	2.54
	High	IANVQSQLEK		8.43959e-05	0	1	1	1	YMR290C	0	1129.62	High	0	0.0004318	3.16
	High	SNYYLHQTAK		0.000165268	0	1	1	2	YMR290C	0	1224.6	High	0	0.0005634	2.74
	High	VNITIGASGK		0.00153073	0.000649755	1	1	1	YMR290C	0	959.552	High	0.0004637	0.001175	2.2
	High	SRDSESTEEPVVDEK		0.000495328	0.000649755	1	1	1	YMR290C	1	1706.77	High	0.0004637	0.0008023	3.52
	High	SYLQAYASHSLK		0.000426612	0.000649755	1	1	2	YMR290C	0	1367.7	High	0.0004637	0.0007671	2.88
	High	TVYQIDKLDLAK		0.00171247	0.000649755	1	1	1	YMR290C	1	1406.79	High	0.0004637	0.001229	2.32
	High	ELALQIFGVAR		0.00136831	0.000649755	1	1	1	YMR290C	0	1216.7	High	0.0004637	0.001126	2.81
	High	ELMEFHSQTFGIVIGGANR	1xOxidation [M3]	0.00108527	0.000649755	1	1	1	YMR290C	0	2122.04	High	0.0004637	0.001035	3.59
	High	QSMLFSATQTTK		0.00871864	0.00106559	1	1	1	YMR290C	0	1342.67	High	0.00103	0.00304	2.31
	High	QNNAAPEGEQTTCVEK	1xCarbamidomethyl [C13]	0.00231002	0.00106559	1	1	1	YMR290C	0	1775.79	High	0.0008405	0.001393	2.5
	High	SLMFLTPNELGFLR	1xOxidation [M3]	0.00362082	0.00106559	1	1	2	YMR290C	0	1653.87	High	0.0009108	0.001712	2.74
	High	SYGFPVPPK		0.0110933	0.00106559	1	1	4	YMR290C	0	991.525	High	0.001627	0.005294	2.24
	High	TLAFLIPAIELLHSLK		0.0025083	0.00106559	1	1	1	YMR290C	0	1779.08	High	0.0009108	0.001443	1.86
	High	LLDHLQNTK		0.00655146	0.00106559	1	1	2	YMR290C	0	1081.6	High	0.0009108	0.002456	2.26
	High	DSESTEEPVVDEK		0.0134927	0.00132229	1	1	1	YMR290C	0	1463.64	High	0.001205	0.004499	1.92
	High	GVNMLIATPGR		0.0210392	0.00216078	1	1	1	YMR290C	0	1128.62	High	0.001783	0.007146	2.48
	High	TVYQIDK		0.0255821	0.00216078	1	1	1	YMR290C	0	866.462	High	0.001783	0.008965	1.96
	High	GILICTDVAAR	1xCarbamidomethyl [C5]	0.0279948	0.00216078	1	1	1	YMR290C	0	1188.64	High	0.001783	0.009973	2.12
	High	ILEIGFEDEMR		0.0265613	0.00216078	1	1	1	YMR290C	0	1351.66	High	0.001783	0.009322	2.25
	High	IIVFLSSCNSVK	1xCarbamidomethyl [C8]	0.0383448	0.00354048	1	1	1	YMR290C	0	1366.74	High	0.00279	0.01461	2.25
	High	SLMFLTPNELGFLR		0.0790857	0.00846887	1	1	1	YMR290C	0	1637.87	High	0.006561	0.03782	1.09
High	Master Protein	YDR190C	RVB1 SGDID:S000002598, Chr IV from 841995-840604, Genome Release 64-2-1, reverse complement, Verified ORF, "ATP-dependent DNA helicase, also known as pontin; member of the AAA+ and RuvB-like protein families; similar to Rvb2p; conserved component of multiple complexes including the INO80 complex, the Swr1 complex, and the R2TP complex (Rvb1-Rvb2-Tah1-Pih1); involved in multiple processes such as …	0	69.415	55	19	27	19	1	463	50.4	5.87	83.54	19
	Confidence	Sequence	Modifications	Qvality PEP	Qvality q-value	# Protein Groups	# Proteins	# PSMs	Master Protein Accessions	# Missed Cleavages	Theo. MH+ [Da]	Confidence (by Search Engine): Sequest HT	Percolator q-Value (by Search Engine): Sequest HT	Percolator PEP (by Search Engine): Sequest HT	XCorr (by Search Engine): Sequest HT
	High	LQVESSALDLLATMGTETSLR		2.42514e-05	0	1	1	1	YDR190C	0	2235.15	High	0	0.0002475	5.03
	High	GTEDVISPHGVPPDLIDR		8.63079e-05	0	1	1	4	YDR190C	0	1916.97	High	0	0.000436	4.06
	High	VEGGFVGQIEAR		2.44331e-05	0	1	1	1	YDR190C	0	1261.65	High	0	0.0002476	3.81
	High	YALQLLAPCGILAQTSNR	1xCarbamidomethyl [C9]	2.36096e-09	0	1	1	2	YDR190C	0	1989.06	High	0	2.576e-06	5.83
	High	ALESNIAPVVVLASNR		1.62036e-05	0	1	1	2	YDR190C	0	1652.93	High	0	0.0002039	4.27
	High	TALALAISQELGPK		1.04297e-05	0	1	1	2	YDR190C	0	1411.82	High	0	0.0004566	3.91
	High	GLGLDESGVAK		0.00062436	0.000649755	1	1	1	YDR190C	0	1045.55	High	0.0004637	0.0008612	2.49
	High	ENPGVNSSNSGAVTR		0.000873823	0.000649755	1	1	1	YDR190C	0	1488.7	High	0.0004637	0.0009584	2.4
	High	RVEGGFVGQIEAR		0.00555333	0.00106559	1	1	1	YDR190C	1	1417.75	High	0.0009108	0.002199	3.39
	High	EIVVNDVNEAK		0.00280649	0.00106559	1	1	1	YDR190C	0	1229.64	High	0.0009108	0.001516	3.07
	High	LQVESSALDLLATMGTETSLR	1xOxidation [M14]	0.00414408	0.00106559	1	1	1	YDR190C	0	2251.15	High	0.0009108	0.00184	3.77
	High	EACGVIVDLIK	1xCarbamidomethyl [C3]	0.00802616	0.00106559	1	1	1	YDR190C	0	1216.66	High	0.00103	0.002857	2.57
	High	VPFCPLVGSELYSVEVK	1xCarbamidomethyl [C4]	0.00925965	0.00106559	1	1	1	YDR190C	0	1922.99	High	0.00103	0.00321	2.45
	High	TISHVIVGLK		0.00234486	0.00106559	1	1	2	YDR190C	0	1066.66	High	0.0009108	0.002474	2.67
	High	EVYEGEVTELTPEDAENPLGGYGK		0.00802616	0.00106559	1	1	1	YDR190C	0	2596.19	High	0.00103	0.002852	2.62
	High	VSIGDVIYIEANTGAVK		0.0118712	0.00132229	1	1	1	YDR190C	0	1748.94	High	0.001205	0.003989	2.46
	High	LDPTIYESIQR		0.0392136	0.00377955	1	1	1	YDR190C	0	1334.7	High	0.002962	0.01504	1.61
	High	LLFLDAK		0.0493947	0.00540776	1	1	1	YDR190C	0	819.497	High	0.00416	0.02024	1.87
	High	AILLAGGPSTGK		0.0653979	0.00687016	1	1	1	YDR190C	0	1084.64	High	0.0054	0.02906	1.98
	High	KTETLMENFR	1xOxidation [M6]	0.0914062	0.00964334	1	1	1	YDR190C	1	1284.63	High	0.007713	0.04679	2.34
High	Master Protein	YLR044C	PDC1 SGDID:S000004034, Chr XII from 234081-232390, Genome Release 64-2-1, reverse complement, Verified ORF, "Major of three pyruvate decarboxylase isozymes; key enzyme in alcoholic fermentation; decarboxylates pyruvate to acetaldehyde; involved in amino acid catabolism; subject to glucose-, ethanol-, and autoregulation; activated by phosphorylation in response to glucose levels; N-terminally prop…	0	68.923	47	20	32	20	1	563	61.5	6.19	79.84	20
	Confidence	Sequence	Modifications	Qvality PEP	Qvality q-value	# Protein Groups	# Proteins	# PSMs	Master Protein Accessions	# Missed Cleavages	Theo. MH+ [Da]	Confidence (by Search Engine): Sequest HT	Percolator q-Value (by Search Engine): Sequest HT	Percolator PEP (by Search Engine): Sequest HT	XCorr (by Search Engine): Sequest HT
	High	MIEIMLPVFDAPQNLVEQAK	2xOxidation [M1; M5]	7.7946e-06	0	1	1	1	YLR044C	0	2318.18	High	0	0.0001438	4.12
	High	MIEIMLPVFDAPQNLVEQAK	1xOxidation [M]	0.000189044	0	1	1	4	YLR044C	0	2302.18	High	0	0.0005926	3.4
	High	NPVILADACCSR	2xCarbamidomethyl [C9; C10]	4.79729e-06	0	1	1	1	YLR044C	0	1375.65	High	0	0.0001134	3.47
	High	VATTGEWDKLTQDK		2.9448e-05	0	1	1	1	YLR044C	1	1591.8	High	0	0.0002703	3.86
	High	AQYNEIQGWDHLSLLPTFGAK		3.1969e-05	0	1	1	1	YLR044C	0	2388.2	High	0	0.0002811	3.3
	High	GSIDEQHPR		0.00149677	0.000649755	1	2	2	YLR044C	0	1038.5	High	0.0004637	0.001166	2.4
	High	YGGVYVGTLSKPEVK		0.000414059	0.000649755	1	1	3	YLR044C	0	1596.86	High	0.0004637	0.0007594	3.44
	High	TTYVTQRPVYLGLPANLVDLNVPAK		0.000247347	0.000649755	1	1	2	YLR044C	0	2742.52	High	0.0009108	0.002144	3.5
	High	NIVEFHSDHMK	1xOxidation [M10]	0.00227569	0.00106559	1	1	2	YLR044C	0	1372.63	High	0.0008405	0.001386	2.93
	High	NATFPGVQMK	1xOxidation [M9]	0.00287026	0.00106559	1	2	2	YLR044C	0	1108.55	High	0.0009108	0.001531	2.41
	High	MSANISETTAMITDIATAPAEIDR	2xOxidation [M1; M11]	0.00990866	0.00106559	1	1	1	YLR044C	0	2554.2	High	0.00103	0.003383	2.46
	High	VATTGEWDK		0.00690542	0.00106559	1	1	1	YLR044C	0	1006.48	High	0.00103	0.002556	1.9
	High	WGLKPYLFVLNNDGYTIEK		0.00291359	0.00106559	1	2	1	YLR044C	0	2270.19	High	0.0009108	0.001541	3.97
	High	GYKPVAVPAR		0.00680237	0.00106559	1	1	1	YLR044C	0	1057.62	High	0.00103	0.002515	2.74
	High	LLQTPIDMSLKPNDAESEK	1xOxidation [M8]	0.0108455	0.00106559	1	1	1	YLR044C	0	2145.07	High	0.00103	0.003675	1.98
	High	LLTTIADAAK		0.00522954	0.00106559	1	1	2	YLR044C	0	1016.6	High	0.00103	0.003741	2.42
	High	LTAATNAK		0.0127998	0.00132229	1	1	2	YLR044C	0	789.446	High	0.001767	0.006133	2.12
	High	KLIDLTQFPAFVTPMGK	1xOxidation [M15]	0.0153358	0.00162885	1	1	1	YLR044C	1	1922.05	High	0.001424	0.005116	2.69
	High	IYEVEGMR	1xOxidation [M7]	0.0301762	0.00216078	1	1	1	YLR044C	0	1012.48	High	0.001783	0.01089	1.88
	High	TPANAAVPASTPLK		0.0318023	0.00239809	1	1	1	YLR044C	0	1337.74	High	0.001955	0.01167	2.96
	High	LIDLTQFPAFVTPMGK	1xOxidation [M14]	0.0335146	0.00314891	1	1	1	YLR044C	0	1793.95	High	0.002508	0.01237	2.31
High	Master Protein	YGR159C	NSR1 SGDID:S000003391, Chr VII from 807656-806412, Genome Release 64-2-1, reverse complement, Verified ORF, "Nucleolar protein that binds nuclear localization sequences; required for pre-rRNA processing and ribosome biogenesis"	0	67.655	51	21	25	21	1	414	44.5	4.93	62.18	21
	Confidence	Sequence	Modifications	Qvality PEP	Qvality q-value	# Protein Groups	# Proteins	# PSMs	Master Protein Accessions	# Missed Cleavages	Theo. MH+ [Da]	Confidence (by Search Engine): Sequest HT	Percolator q-Value (by Search Engine): Sequest HT	Percolator PEP (by Search Engine): Sequest HT	XCorr (by Search Engine): Sequest HT
	High	NEETEEPATIFVGR		2.31888e-05	0	1	1	2	YGR159C	0	1591.76	High	0	0.0002419	3.5
	High	GGFRPSGSGANTAPLGR		0.000123513	0	1	1	1	YGR159C	0	1601.81	High	0	0.0005044	3.84
	High	GFGYVQFSNMEDAK		3.17311e-05	0	1	1	1	YGR159C	0	1592.7	High	0	0.0002804	3.6
	High	ALDALQGEYIDNRPVR		4.64387e-05	0	1	1	1	YGR159C	0	1829.95	High	0	0.0003334	3
	High	KSEDAEEEEDEESSNK		0.000746945	0.000649755	1	1	1	YGR159C	1	1854.74	High	0.0004637	0.0009111	3.85
	High	IPTHPETEQPK		0.000340996	0.000649755	1	1	2	YGR159C	0	1276.65	High	0.0004637	0.0007173	2.94
	High	QKNEETEEPATIFVGR		0.000300346	0.000649755	1	1	1	YGR159C	1	1847.91	High	0.0004637	0.0006902	3.95
	High	EIDGRPINCDMSTSKPAGNNDR	1xCarbamidomethyl [C9]	0.010059	0.00106559	1	1	1	YGR159C	0	2447.1	High	0.00103	0.003443	2.32
	High	EIDGRPINCDMSTSKPAGNNDR	1xCarbamidomethyl [C9]; 1xOxidation [M11]	0.00188739	0.00106559	1	1	1	YGR159C	0	2463.1	High	0.0008405	0.00128	2.34
	High	EFEHIGGVIGAR		0.00796601	0.00106559	1	1	1	YGR159C	0	1284.67	High	0.00103	0.002833	2.28
	High	DAIFELFAK		0.00291359	0.00106559	1	1	1	YGR159C	0	1053.56	High	0.0009108	0.001546	2.06
	High	FGDTPSEPSDTLFLGNLSFNADR		0.0060317	0.00106559	1	1	1	YGR159C	0	2500.16	High	0.0009108	0.002317	3.14
	High	KSEDAEEEEDEESSNKK		0.00346158	0.00106559	1	1	1	YGR159C	2	1982.83	High	0.0009108	0.001679	4.32
	High	GFGYVQFSNMEDAKK	1xOxidation [M10]	0.00227569	0.00106559	1	1	1	YGR159C	1	1736.79	High	0.0008405	0.001382	2.3
	High	LDFSSPRPNNDGGR		0.00488787	0.00106559	1	1	1	YGR159C	0	1531.72	High	0.0009108	0.002026	2.43
	High	KFGDTPSEPSDTLFLGNLSFNADR		0.00690542	0.00106559	1	1	1	YGR159C	1	2628.26	High	0.00103	0.002545	3.08
	High	KALDALQGEYIDNRPVR		0.00626261	0.00106559	1	1	1	YGR159C	1	1958.05	High	0.0009108	0.002374	3.26
	High	HGEVVSVR		0.0107642	0.00106559	1	1	1	YGR159C	0	882.479	High	0.00103	0.003656	2.89
	High	SEDAEEEEDEESSNKK		0.0187932	0.00210976	1	1	1	YGR159C	1	1854.74	High	0.001767	0.006301	1.83
	High	GYGYVDFENK		0.020725	0.00210976	1	1	1	YGR159C	0	1191.53	High	0.001767	0.007013	2.65
	High	NTASFAGSK		0.0215195	0.00216078	1	1	1	YGR159C	0	882.432	High	0.001783	0.007322	2.17
	High	LSWSIDDEWLK		0.059871	0.0063287	1	1	1	YGR159C	0	1391.68	High	0.004998	0.02588	1.74
	High	GFGYVQFSNMEDAKK		0.0683409	0.0071867	1	1	1	YGR159C	1	1720.8	High	0.005639	0.03086	1.73
High	Master Protein	YAL038W	CDC19 SGDID:S000000036, Chr I from 71786-73288, Genome Release 64-2-1, Verified ORF, "Pyruvate kinase; functions as a homotetramer in glycolysis to convert phosphoenolpyruvate to pyruvate, the input for aerobic (TCA cycle) or anaerobic (glucose fermentation) respiration; regulated via allosteric activation by fructose bisphosphate; CDC19 has a paralog, PYK2, that arose from the whole genome dupli…	0	65.809	52	21	28	21	1	500	54.5	7.68	66.85	21
	Confidence	Sequence	Modifications	Qvality PEP	Qvality q-value	# Protein Groups	# Proteins	# PSMs	Master Protein Accessions	# Missed Cleavages	Theo. MH+ [Da]	Confidence (by Search Engine): Sequest HT	Percolator q-Value (by Search Engine): Sequest HT	Percolator PEP (by Search Engine): Sequest HT	XCorr (by Search Engine): Sequest HT
	High	NCTPKPTSTTETVAASAVAAVFEQK	1xCarbamidomethyl [C2]	2.23978e-06	0	1	1	1	YAL038W	0	2608.29	High	0	7.787e-05	4.61
	High	GVFPFVFEKEPVSDWTDDVEAR		8.63079e-05	0	1	1	1	YAL038W	1	2569.22	High	0	0.0004362	3.28
	High	AEVSDVGNAILDGADCVMLSGETAK	1xCarbamidomethyl [C16]; 1xOxidation [M18]	4.50721e-05	0	1	1	1	YAL038W	0	2538.17	High	0	0.0003286	4.58
	High	YRPNCPIILVTR	1xCarbamidomethyl [C5]	0.000741386	0.000649755	1	1	1	YAL038W	0	1501.83	High	0.0004637	0.0009076	2.7
	High	LTSLNVVAGSDLR		0.00137858	0.000649755	1	1	1	YAL038W	0	1344.75	High	0.0004637	0.001131	3.4
	High	MNFSHGSYEYHK	1xOxidation [M1]	0.00168704	0.000649755	1	1	2	YAL038W	0	1515.63	High	0.0004637	0.001222	2.33
	High	TSIIGTIGPK		0.00135811	0.000649755	1	2	2	YAL038W	0	986.588	High	0.00103	0.00315	2.15
	High	AIIVLSTSGTTPR		0.000330962	0.000649755	1	1	1	YAL038W	0	1315.76	High	0.0004637	0.0007108	3.24
	High	SEELYPGRPLAIALDTK		0.00660089	0.00106559	1	1	1	YAL038W	0	1873.01	High	0.0009108	0.002467	2.91
	High	IMYVDYK	1xOxidation [M2]	0.00940009	0.00106559	1	1	2	YAL038W	0	947.454	High	0.00103	0.003241	2.16
	High	AGAGHSNTLQVSTV		0.00335934	0.00106559	1	1	1	YAL038W	0	1341.68	High	0.0009108	0.001652	3.26
	High	AEVSDVGNAILDGADCVMLSGETAK	1xCarbamidomethyl [C16]	0.00820935	0.00106559	1	1	1	YAL038W	0	2522.17	High	0.00103	0.002902	2.77
	High	EVLGEQGKDVK		0.00858842	0.00106559	1	1	1	YAL038W	1	1201.64	High	0.00103	0.003011	2.68
	High	EVLGEQGK		0.00905294	0.00106559	1	1	1	YAL038W	0	859.452	High	0.00103	0.003153	1.83
	High	EPVSDWTDDVEAR		0.00217576	0.00106559	1	1	1	YAL038W	0	1518.67	High	0.0008405	0.001356	2.34
	High	GDLGIEIPAPEVLAVQK		0.00316387	0.00106559	1	1	3	YAL038W	0	1748.98	High	0.00103	0.00307	2.59
	High	INFGIEK		0.0128965	0.00132229	1	1	1	YAL038W	0	820.456	High	0.001205	0.004307	2.01
	High	TNNPETLVALR		0.0143307	0.00132229	1	1	1	YAL038W	0	1227.67	High	0.001205	0.004787	2.14
	High	VTDGVMVAR	1xOxidation [M6]	0.0149932	0.00162885	1	1	1	YAL038W	0	963.493	High	0.001424	0.004988	2.65
	High	SNLAGKPVICATQMLESMTYNPRPTR	1xCarbamidomethyl [C10]; 2xOxidation [M14; M18]	0.0259694	0.00216078	1	1	1	YAL038W	0	2967.45	High	0.001783	0.009101	2.11
	High	IMYVDYK		0.024271	0.00216078	1	1	1	YAL038W	0	931.459	High	0.001783	0.008394	1.76
	High	KSEELYPGRPLAIALDTK		0.0475942	0.0050128	1	1	1	YAL038W	1	2001.1	High	0.003872	0.01929	3.25
	High	FSHLYR		0.0914062	0.00964334	1	1	1	YAL038W	0	822.426	High	0.007713	0.04682	1.58
High	Master Protein	YBL045C	COR1 SGDID:S000000141, Chr II from 135516-134143, Genome Release 64-2-1, reverse complement, Verified ORF, "Core subunit of the ubiquinol-cytochrome c reductase complex; the ubiquinol-cytochrome c reductase complex (bc1 complex) is a component of the mitochondrial inner membrane electron transport chain"	0	65.284	54	19	25	19	1	457	50.2	7.3	66.36	19
	Confidence	Sequence	Modifications	Qvality PEP	Qvality q-value	# Protein Groups	# Proteins	# PSMs	Master Protein Accessions	# Missed Cleavages	Theo. MH+ [Da]	Confidence (by Search Engine): Sequest HT	Percolator q-Value (by Search Engine): Sequest HT	Percolator PEP (by Search Engine): Sequest HT	XCorr (by Search Engine): Sequest HT
	High	EGLALSSNISR		0.000111253	0	1	1	1	YBL045C	0	1146.61	High	0	0.0004842	2.98
	High	LQLGQLYESGNPVNDANLLGAEVLIK		5.89735e-05	0	1	1	1	YBL045C	0	2768.48	High	0	0.0003702	3.54
	High	LTISVTDTEVER		1.00475e-05	0	1	1	1	YBL045C	0	1362.71	High	0	0.0001621	3.14
	High	NVTMIDDLIHFTLK	1xOxidation [M4]	3.5492e-05	0	1	1	2	YBL045C	0	1675.87	High	0	0.0002945	2.81
	High	QVQDFEENDHPNR		3.17311e-05	0	1	1	2	YBL045C	0	1627.71	High	0	0.0002804	2.71
	High	LAAQIFGSYNAFEPASR		5.94155e-05	0	1	1	3	YBL045C	0	1841.92	High	0	0.0003713	3.44
	High	AWISLAVEGEPVNSPNYFVAK		0.000114626	0	1	1	1	YBL045C	0	2291.17	High	0	0.0004898	3.88
	High	VLEHLHSTAFQNTPLSLPTR		0.000719562	0.000649755	1	1	2	YBL045C	0	2261.2	High	0.0004637	0.0008994	3.71
	High	HEDLVNSIESK		0.000714207	0.000649755	1	1	1	YBL045C	0	1270.63	High	0.0004637	0.0008973	3.79
	High	NLSLQTGTKPVLK		0.000741386	0.000649755	1	1	2	YBL045C	0	1398.83	High	0.0004637	0.0009093	2.48
	High	LLDNIQEYQLCDNFNHFSLSYK	1xCarbamidomethyl [C11]	0.000537734	0.000649755	1	1	1	YBL045C	0	2761.29	High	0.0004637	0.0008226	3.02
	High	ANLLSSSNFEATK		0.000977463	0.000649755	1	1	1	YBL045C	0	1381.7	High	0.0004637	0.000996	3.12
	High	LSLGEAFK		0.00940009	0.00106559	1	1	1	YBL045C	0	864.483	High	0.00103	0.003252	1.74
	High	AAFLGSEVR		0.00215953	0.00106559	1	1	1	YBL045C	0	949.51	High	0.0008405	0.001353	2.12
	High	DFQSYIVSSLPGSTDK		0.0102116	0.00106559	1	1	1	YBL045C	0	1743.84	High	0.00103	0.003482	2.28
	High	IDAITVK		0.0107642	0.00106559	1	1	1	YBL045C	0	759.461	High	0.00103	0.003641	2.34
	High	DSGLWGFSTATR		0.0128965	0.00132229	1	1	1	YBL045C	0	1297.62	High	0.001205	0.004328	2.07
	High	ANLLSSSNFEATKK		0.0149932	0.00162885	1	1	1	YBL045C	1	1509.79	High	0.001424	0.005003	2.24
	High	KIDAITVK		0.0729927	0.00834875	1	1	1	YBL045C	1	887.556	High	0.006477	0.034	2.36
High	Master Protein	YPL235W	RVB2 SGDID:S000006156, Chr XVI from 103232-104647, Genome Release 64-2-1, Verified ORF, "ATP-dependent DNA helicase, also known as reptin; member of the AAA+ and RuvB protein families, similar to Rvb1p; conserved component of multiple complexes including the INO80 complex, the Swr1 complex, and the R2TP complex (Rvb1-Rvb2-Tah1-Pih1); involved in multiple processes such as chromatin remodeling, bo…	0	64.507	40	18	24	18	1	471	51.6	5.31	70.09	18
	Confidence	Sequence	Modifications	Qvality PEP	Qvality q-value	# Protein Groups	# Proteins	# PSMs	Master Protein Accessions	# Missed Cleavages	Theo. MH+ [Da]	Confidence (by Search Engine): Sequest HT	Percolator q-Value (by Search Engine): Sequest HT	Percolator PEP (by Search Engine): Sequest HT	XCorr (by Search Engine): Sequest HT
	High	IKEETELIEGEVVEIQIDR		6.54725e-05	0	1	1	1	YPL235W	1	2242.18	High	0	0.0003874	4.38
	High	TVVHTVSLHEIDVINSR		4.92974e-05	0	1	1	2	YPL235W	0	1919.03	High	0	0.0003419	3.65
	High	TTDMETIYELGNK	1xOxidation [M4]	1.10718e-05	0	1	1	1	YPL235W	0	1530.7	High	0	0.0001703	3.61
	High	YSSNLISVAQQIAMK	1xOxidation [M14]	8.93945e-07	0	1	1	3	YPL235W	0	1668.86	High	0	4.943e-05	4.51
	High	TALAMGVSQSLGK	1xOxidation [M5]	9.87244e-05	0	1	1	1	YPL235W	0	1278.67	High	0	0.0004613	3.07
	High	KNNTVEVEDVKR		0.00116079	0.000649755	1	1	1	YPL235W	2	1430.76	High	0.0004637	0.001061	3.82
	High	NNTVEVEDVK		0.000518026	0.000649755	1	1	1	YPL235W	0	1146.56	High	0.0004637	0.0008119	2.56
	High	TTDMETIYELGNK		0.000395918	0.000649755	1	1	1	YPL235W	0	1514.7	High	0.0004637	0.0007501	2.88
	High	AVLVAGPPSTGK		0.000880377	0.000649755	1	1	1	YPL235W	0	1096.64	High	0.0004637	0.0009626	3.19
	High	DYDAMGADTR	1xOxidation [M5]	0.00144184	0.000649755	1	1	1	YPL235W	0	1130.44	High	0.0004637	0.00115	2.72
	High	FVQCPEGELQK	1xCarbamidomethyl [C4]	0.000398885	0.000649755	1	1	1	YPL235W	0	1334.64	High	0.0004637	0.0007517	2.42
	High	ALEDEFAPIVMMATNR	2xOxidation [M11; M12]	0.00282759	0.00106559	1	1	1	YPL235W	0	1839.86	High	0.0009108	0.00152	2.71
	High	AYLLFLDSAR		0.00594174	0.00106559	1	1	1	YPL235W	0	1168.64	High	0.0009108	0.002293	2.4
	High	TGVETSLR		0.00381593	0.00106559	1	1	1	YPL235W	0	862.463	High	0.0009108	0.001763	2.65
	High	SPHGLPLDLLDR		0.0202623	0.00210976	1	1	1	YPL235W	0	1332.73	High	0.001767	0.006854	2.69
	High	SIIITTK		0.022513	0.00216078	1	1	1	YPL235W	0	775.492	High	0.001783	0.007707	1.97
	High	AAGVILK		0.0279948	0.00216078	1	1	1	YPL235W	0	671.445	High	0.001783	0.009999	2.15
	High	MIDGLTK		0.0320415	0.00239809	1	1	1	YPL235W	0	777.418	High	0.001955	0.01173	1.8
	High	NNTVEVEDVKR		0.0335146	0.00314891	1	1	2	YPL235W	1	1302.66	High	0.002508	0.01243	2.37
	High	DYDAMGADTR		0.0802438	0.00863652	1	1	1	YPL235W	0	1114.45	High	0.006684	0.03876	2.09
High	Master Protein	YLL024C	SSA2 SGDID:S000003947, Chr XII from 97485-95566, Genome Release 64-2-1, reverse complement, Verified ORF, "ATP-binding protein; involved in protein folding and vacuolar import of proteins; member of heat shock protein 70 (HSP70) family; associated with the chaperonin-containing T-complex; present in the cytoplasm, vacuolar membrane and cell wall; 98% identical with paralog Ssa1p, but subtle diffe…	0	63.836	40	21	24	5	1	639	69.4	5.06	61.27	21
	Confidence	Sequence	Modifications	Qvality PEP	Qvality q-value	# Protein Groups	# Proteins	# PSMs	Master Protein Accessions	# Missed Cleavages	Theo. MH+ [Da]	Confidence (by Search Engine): Sequest HT	Percolator q-Value (by Search Engine): Sequest HT	Percolator PEP (by Search Engine): Sequest HT	XCorr (by Search Engine): Sequest HT
	High	NQAAMNPANTVFDAK	1xOxidation [M5]	6.26038e-05	0	1	1	1	YLL024C	0	1607.75	High	0	0.0003795	3.21
	High	NTISEAGDKLEQADKDAVTK		1.01987e-05	0	1	1	2	YLL024C	2	2133.07	High	0	0.0001639	3.67
	High	IINEPTAAAIAYGLDKK		4.89307e-05	0	3	4	1	YAL005C; YER103W; YLL024C	1	1787.99	High	0	0.0003411	4.43
	High	FEELCADLFR	1xCarbamidomethyl [C5]	0.000182116	0	3	4	1	YAL005C; YER103W; YLL024C	0	1299.6	High	0	0.0005846	2.76
	High	ATAGDTHLGGEDFDNR		0.000107176	0	2	3	1	YAL005C; YLL024C	0	1675.73	High	0	0.0004763	3.33
	High	LVNHFIQEFK		0.00139935	0.000649755	2	2	1	YAL005C; YLL024C	0	1274.69	High	0.0004637	0.001137	2.41
	High	LIDVDGKPQIQVEFK		0.000442841	0.000649755	2	2	1	YAL005C; YLL024C	0	1728.95	High	0.0004637	0.0007758	3.02
	High	DAGTIAGLNVLR		0.000601475	0.000649755	4	4	1	YAL005C; YJL034W; YER103W; YLL024C	0	1199.67	High	0.0004637	0.0008515	3.08
	High	FKEEDEKESQR		0.000648117	0.000649755	2	2	1	YAL005C; YLL024C	2	1424.67	High	0.0004637	0.0008713	3.43
	High	ARFEELCADLFR	1xCarbamidomethyl [C7]	0.001348	0.000649755	3	4	1	YAL005C; YER103W; YLL024C	1	1526.74	High	0.0004637	0.00112	3.48
	High	NSTIPTK		0.0109275	0.00106559	3	4	1	YAL005C; YER103W; YLL024C	0	760.42	High	0.00103	0.003691	2.14
	High	ELQEVANPIMSK	1xOxidation [M10]	0.00594174	0.00106559	1	1	1	YLL024C	0	1374.69	High	0.0009108	0.002297	1.38
	High	NFNDPEVQGDMK		0.00211159	0.00106559	1	1	1	YLL024C	0	1393.61	High	0.0008405	0.001339	2.72
	High	SINPDEAVAYGAAVQAAILTGDESSK		0.00727858	0.00106559	2	2	1	YAL005C; YLL024C	0	2577.27	High	0.00103	0.002644	3.31
	High	TTPSFVGFTDTER		0.00534868	0.00106559	1	1	1	YLL024C	0	1457.69	High	0.0009108	0.002148	1.97
	High	FELSGIPPAPR		0.00215953	0.00106559	3	4	1	YAL005C; YER103W; YLL024C	0	1183.65	High	0.0008405	0.001352	2.51
	High	ELQEVANPIMSK		0.0199597	0.00210976	1	1	1	YLL024C	0	1358.7	High	0.001767	0.006726	2.14
	High	NFNDPEVQGDMK	1xOxidation [M11]	0.0327699	0.00291415	1	1	1	YLL024C	0	1409.6	High	0.00233	0.01207	2.29
	High	LIGDAAK		0.0404021	0.00398433	6	7	1	YAL005C; YNL209W; YJL034W; YER103W; YLL024C; YDL229W	0	687.404	High	0.003118	0.01563	1.89
	High	STLDPVEK		0.0486667	0.00523344	2	2	1	YAL005C; YLL024C	0	888.467	High	0.004036	0.01977	2.15
	High	MKETAESYLGAK	1xOxidation [M1]	0.0512611	0.00540776	2	2	1	YAL005C; YLL024C	1	1343.65	High	0.00416	0.02111	2.62
	High	NQLESIAYSLK		0.0581303	0.0063287	2	2	1	YAL005C; YLL024C	0	1265.67	High	0.004998	0.02486	1.43
	High	TKDNNLLGK		0.0673461	0.00705222	3	4	1	YAL005C; YER103W; YLL024C	1	1002.56	High	0.00553	0.03031	1.83
High	Master Protein	YNL248C	RPA49 SGDID:S000005192, Chr XIV from 182608-181361, Genome Release 64-2-1, reverse complement, Verified ORF, "RNA polymerase I subunit A49; essential for nucleolar assembly and for high polymerase loading rate; required for nucleolar localization of Rpa34p"	0	60.688	39	18	27	18	1	415	46.6	9.54	63.47	18
	Confidence	Sequence	Modifications	Qvality PEP	Qvality q-value	# Protein Groups	# Proteins	# PSMs	Master Protein Accessions	# Missed Cleavages	Theo. MH+ [Da]	Confidence (by Search Engine): Sequest HT	Percolator q-Value (by Search Engine): Sequest HT	Percolator PEP (by Search Engine): Sequest HT	XCorr (by Search Engine): Sequest HT
	High	LNSPPEILVDGILSR		5.16924e-06	0	1	1	6	YNL248C	0	1622.91	High	0.0004637	0.0007811	4.07
	High	LTDSAIDIVDSVR		8.65359e-06	0	1	1	1	YNL248C	0	1403.74	High	0	0.0001512	3.76
	High	LDSLTQPSQMTK	1xOxidation [M10]	6.27691e-06	0	1	1	1	YNL248C	0	1364.67	High	0	0.0001293	3.71
	High	IDSDKLTDSAIDIVDSVR		2.30163e-05	0	1	1	2	YNL248C	1	1962	High	0	0.0002411	4
	High	APSDTTFDLYK		0.000120777	0	1	1	1	YNL248C	0	1257.6	High	0	0.0005003	3.3
	High	LDSLTQPSQMTK		0.000330962	0.000649755	1	1	1	YNL248C	0	1348.68	High	0.0004637	0.0007098	3.55
	High	GATVAQAEAFGIPK		0.00148562	0.000649755	1	1	1	YNL248C	0	1359.73	High	0.0004637	0.001163	3.24
	High	NALGEAFGTK		0.00144184	0.000649755	1	1	1	YNL248C	0	1007.52	High	0.0004637	0.00115	2.47
	High	SVSEIEIESVQDQPSVAVGSFFK		0.00158905	0.000649755	1	1	1	YNL248C	0	2482.23	High	0.0004637	0.001192	3.24
	High	APSDTTFDLYKK		0.00166199	0.000649755	1	1	1	YNL248C	1	1385.69	High	0.0004637	0.001216	3.75
	High	SEKDEFVLHGENER		0.00827134	0.00106559	1	1	1	YNL248C	1	1688.79	High	0.00103	0.002928	2.3
	High	KLDSLTQPSQMTK		0.0116937	0.00106559	1	1	1	YNL248C	1	1476.77	High	0.00103	0.00392	2.46
	High	DEFVLHGENER		0.0120514	0.00132229	1	1	2	YNL248C	0	1344.62	High	0.001205	0.004042	2.28
	High	KSEKDEFVLHGENER		0.0248245	0.00216078	1	1	1	YNL248C	2	1816.88	High	0.001783	0.008681	2.32
	High	SYFIDPQNEDK		0.0340203	0.00314891	1	1	1	YNL248C	0	1355.61	High	0.002654	0.01259	1.56
	High	AIADLER		0.0369384	0.00354048	1	1	1	YNL248C	0	787.431	High	0.00279	0.01402	1.84
	High	APVLVSK		0.0535909	0.00576207	1	1	1	YNL248C	0	713.456	High	0.00459	0.02233	1.85
	High	KLDSLTQPSQMTK	1xOxidation [M11]	0.0581303	0.0063287	1	1	1	YNL248C	1	1492.77	High	0.004998	0.02502	2.25
	High	VLGAIVK		0.0683409	0.0071867	1	1	1	YNL248C	0	699.476	High	0.005639	0.03098	2.05
	High	SDTRPSALR		0.0719337	0.00821951	1	1	1	YNL248C	0	1002.53	High	0.006391	0.03315	1.93
High	Master Protein	IPI00450768 IPI:IPI00450768.4	SWISS-PROT:Q04695 TREMBL:Q6IP98;Q14666|REFSEQ_NP:NP_000413|ENSEMBL:ENSP00000319235|H-INV:HIT000035527 Tax_Id=9606 Keratin, type I cytoskeletal 17	0	59.013	42	19	33	8	1	431	47.9	5.02	68.87	19
	Confidence	Sequence	Modifications	Qvality PEP	Qvality q-value	# Protein Groups	# Proteins	# PSMs	Master Protein Accessions	# Missed Cleavages	Theo. MH+ [Da]	Confidence (by Search Engine): Sequest HT	Percolator q-Value (by Search Engine): Sequest HT	Percolator PEP (by Search Engine): Sequest HT	XCorr (by Search Engine): Sequest HT
	High	EVATNSELVQSGK		2.44331e-05	0	2	2	1	IPI00384444 IPI:IPI00384444.4; IPI00450768 IPI:IPI00450768.4	0	1361.69	High	0	0.0002481	3.46
	High	ASLEGNLAETENR		0.000116351	0	1	1	1	IPI00450768 IPI:IPI00450768.4	0	1403.68	High	0	0.0004922	2.92
	High	VLDELTLAR		0.00102229	0.000649755	4	8	2	IPI00384444 IPI:IPI00384444.4; IPI00217963 IPI:IPI00217963.2; IPI00450768 IPI:IPI00450768.4; IPI00290077 IPI:IPI00290077.1	0	1029.59	High	0.0004637	0.001013	2.98
	High	TMQALEIELQSQLSMK	2xOxidation [M2; M15]	0.000401875	0.000649755	1	1	1	IPI00450768 IPI:IPI00450768.4	0	1881.93	High	0.0004637	0.0007528	2.63
	High	TRLEQEIATYR		0.0015538	0.000649755	4	8	2	IPI00384444 IPI:IPI00384444.4; IPI00217963 IPI:IPI00217963.2; IPI00450768 IPI:IPI00450768.4; IPI00290077 IPI:IPI00290077.1	1	1379.73	High	0.0004637	0.001182	3.65
	High	LLEGEDAHLTQYK		0.000927649	0.000649755	1	1	1	IPI00450768 IPI:IPI00450768.4	0	1516.76	High	0.0004637	0.0009794	2.29
	High	DAEDWFFSK		0.00154222	0.000649755	1	1	1	IPI00450768 IPI:IPI00450768.4	0	1144.49	High	0.0004637	0.001181	2.27
	High	QFTSSSSIK		0.00460303	0.00106559	1	1	1	IPI00450768 IPI:IPI00450768.4	0	984.5	High	0.0009108	0.001959	2.04
	High	NHEEEMNALR	1xOxidation [M6]	0.0051516	0.00106559	2	2	2	IPI00384444 IPI:IPI00384444.4; IPI00450768 IPI:IPI00450768.4	0	1258.55	High	0.00459	0.02213	2.29
	High	NHEEEMNALR		0.00201887	0.00106559	2	2	1	IPI00384444 IPI:IPI00384444.4; IPI00450768 IPI:IPI00450768.4	0	1242.55	High	0.0008405	0.001315	1.78
	High	CEMEQQNQEYK	1xCarbamidomethyl [C1]	0.00650241	0.00106559	2	2	1	IPI00384444 IPI:IPI00384444.4; IPI00450768 IPI:IPI00450768.4	0	1486.59	High	0.0009108	0.002446	2.14
	High	TIEELQNK		0.00433486	0.00106559	1	2	1	IPI00450768 IPI:IPI00450768.4	0	974.515	High	0.0009108	0.00189	2.61
	High	ATMQNLNDR	1xOxidation [M3]	0.00195934	0.00106559	2	3	1	IPI00304458 IPI:IPI00304458.1; IPI00450768 IPI:IPI00450768.4	0	1078.49	High	0.0008405	0.001299	2
	High	LAADDFR		0.00784707	0.00106559	7	27	5	IPI00295684 IPI:IPI00295684.1; IPI00384444 IPI:IPI00384444.4; IPI00383111 IPI:IPI00383111.1; sp; IPI00217963 IPI:IPI00217963.2; IPI00450768 IPI:IPI00450768.4; IPI00290077 IPI:IPI00290077.1	0	807.4	High	0.00416	0.02124	2.21
	High	LASYLDK		0.00680237	0.00106559	7	14	6	IPI00295684 IPI:IPI00295684.1; IPI00384444 IPI:IPI00384444.4; IPI00383111 IPI:IPI00383111.1; IPI00217963 IPI:IPI00217963.2; IPI00450768 IPI:IPI00450768.4; IPI00290077 IPI:IPI00290077.1; IPI00019359 IPI:IPI00019359.2	0	809.44	High	0.001955	0.0117	2.31
	High	TKFETEQALR		0.0179632	0.00210976	1	3	1	IPI00450768 IPI:IPI00450768.4	1	1222.64	High	0.001767	0.006047	2.71
	High	LSGGLGAGSCR	1xCarbamidomethyl [C10]	0.0179632	0.00210976	1	2	1	IPI00450768 IPI:IPI00450768.4	0	1034.5	High	0.001767	0.006018	1.59
	High	SEISELR		0.0372156	0.00354048	2	2	1	IPI00384444 IPI:IPI00384444.4; IPI00450768 IPI:IPI00450768.4	0	833.436	High	0.00279	0.01417	1.99
	High	LASYLDKVR		0.0416257	0.00466421	6	11	1	IPI00295684 IPI:IPI00295684.1; IPI00384444 IPI:IPI00384444.4; IPI00383111 IPI:IPI00383111.1; IPI00217963 IPI:IPI00217963.2; IPI00450768 IPI:IPI00450768.4; IPI00290077 IPI:IPI00290077.1	1	1064.61	High	0.003615	0.01631	2.06
	High	TEELNR		0.0703725	0.00739284	2	4	2	IPI00384444 IPI:IPI00384444.4; IPI00450768 IPI:IPI00450768.4	0	761.379	High	0.005782	0.03215	1.68
High	Master Protein	YHR183W	GND1 SGDID:S000001226, Chr VIII from 470960-472429, Genome Release 64-2-1, Verified ORF, "6-phosphogluconate dehydrogenase (decarboxylating); catalyzes an NADPH regenerating reaction in the pentose phosphate pathway; required for growth on D-glucono-delta-lactone and adaptation to oxidative stress; GND1 has a paralog, GND2, that arose from the whole genome duplication"	0	58.27	48	20	25	20	1	489	53.5	6.64	64.67	20
	Confidence	Sequence	Modifications	Qvality PEP	Qvality q-value	# Protein Groups	# Proteins	# PSMs	Master Protein Accessions	# Missed Cleavages	Theo. MH+ [Da]	Confidence (by Search Engine): Sequest HT	Percolator q-Value (by Search Engine): Sequest HT	Percolator PEP (by Search Engine): Sequest HT	XCorr (by Search Engine): Sequest HT
	High	DREQFVDDLEQALYASK		0.00010248	0	1	1	1	YHR183W	1	2026.97	High	0	0.0004678	3.52
	High	GILFVGSGVSGGEEGAR		0.000161607	0	1	1	1	YHR183W	0	1591.81	High	0	0.0005598	3.47
	High	LGGFTDKEISDVFAK		3.26932e-05	0	1	1	1	YHR183W	1	1626.84	High	0	0.0002839	4
	High	FDDVDGKPLVEK		0.00010021	0	1	2	3	YHR183W	0	1361.69	High	0	0.000464	2.7
	High	LPANLLQAQR		0.000340996	0.000649755	1	2	1	YHR183W	0	1123.66	High	0.0004637	0.0007161	2.8
	High	LNNPAIALMWR	1xOxidation [M9]	0.000682905	0.000649755	1	2	1	YHR183W	0	1314.7	High	0.0004637	0.0008853	2.35
	High	AGAPVDALINQIVPLLEK		0.00023651	0.000649755	1	1	3	YHR183W	0	1861.08	High	0.0004637	0.0008108	3.16
	High	VLPECASDNLPVDK	1xCarbamidomethyl [C5]	0.00191585	0.00106559	1	1	1	YHR183W	0	1556.76	High	0.0008405	0.001286	2.08
	High	VDHFLANEAK		0.00414408	0.00106559	1	1	2	YHR183W	0	1143.58	High	0.00459	0.02341	2.78
	High	YGPSLMPGGSEEAWPHIK	1xOxidation [M6]	0.00852404	0.00106559	1	1	1	YHR183W	0	1971.93	High	0.00103	0.003003	2.76
	High	SVFLGQITK		0.0049247	0.00106559	1	1	1	YHR183W	0	992.578	High	0.0009108	0.002041	2.02
	High	AYREEPDLENLLFNK		0.00755746	0.00106559	1	1	1	YHR183W	1	1850.93	High	0.00103	0.002719	2.8
	High	GDIIIDGGNSHFPDSNR		0.00201887	0.00106559	1	1	1	YHR183W	0	1813.85	High	0.0008405	0.001314	2.54
	High	FFADAVTK		0.017562	0.00210976	1	1	1	YHR183W	0	898.467	High	0.001767	0.00589	2.19
	High	IISYAQGFMLIR	1xOxidation [M9]	0.0308628	0.00239809	1	2	1	YHR183W	0	1427.77	High	0.001955	0.01123	2.16
	High	VLPGPEVPKDAVK		0.0355827	0.00335822	1	1	1	YHR183W	1	1348.78	High	0.002654	0.0133	3.07
	High	KGILFVGSGVSGGEEGAR		0.0493947	0.00540776	1	1	1	YHR183W	1	1719.9	High	0.00416	0.02014	3.38
	High	EEPDLENLLFNK		0.0577028	0.0063287	1	1	1	YHR183W	0	1460.73	High	0.004998	0.02467	1.67
	High	NIFQSISAK		0.0594312	0.0063287	1	1	1	YHR183W	0	1007.55	High	0.004998	0.02566	1.73
	High	IMDTAGQK	1xOxidation [M2]	0.0881682	0.00951819	1	2	1	YHR183W	0	879.424	High	0.007328	0.04414	1.69
High	Master Protein	YPL063W	TIM50 SGDID:S000005984, Chr XVI from 429939-431369, Genome Release 64-2-1, Verified ORF, "Essential component of the TIM23 complex; acts as receptor for the translocase of the inner mitochondrial membrane (TIM23) complex guiding incoming precursors from the TOM complex; may control the gating of the Tim23p-Tim17p channel"	0	56.866	40	15	21	15	1	476	55.1	7.24	56.84	15
	Confidence	Sequence	Modifications	Qvality PEP	Qvality q-value	# Protein Groups	# Proteins	# PSMs	Master Protein Accessions	# Missed Cleavages	Theo. MH+ [Da]	Confidence (by Search Engine): Sequest HT	Percolator q-Value (by Search Engine): Sequest HT	Percolator PEP (by Search Engine): Sequest HT	XCorr (by Search Engine): Sequest HT
	High	IQQEQMGGQTFTLK	1xOxidation [M6]	3.11919e-07	0	1	1	1	YPL063W	0	1624.8	High	0	2.925e-05	4.48
	High	SGGNWAMTALGLGNSLGGSTK	1xOxidation [M7]	3.245e-05	0	1	1	2	YPL063W	0	1994.96	High	0	0.0002827	3.42
	High	DVRPILNSFEDKK		5.19428e-05	0	1	1	1	YPL063W	1	1560.84	High	0	0.0003506	4.29
	High	FPLDLIHEEGQK		0.000104022	0	1	1	3	YPL063W	0	1425.74	High	0	0.0004715	3.41
	High	VIIIDTDPNSYK		0.000304865	0.000649755	1	1	1	YPL063W	0	1377.73	High	0.0004637	0.0006922	2.77
	High	NLAEEFDHR		0.00135811	0.000649755	1	1	2	YPL063W	0	1130.52	High	0.0009108	0.001588	2.47
	High	NEETSGEGGEDKNEPSSK		0.00156546	0.000649755	1	1	1	YPL063W	1	1893.79	High	0.0004637	0.001188	2.97
	High	LIPFLEYLATQQTK		0.000245507	0.000649755	1	1	2	YPL063W	0	1664.93	High	0.0004637	0.0006478	2.39
	High	DWEPQESEELKK		0.00576586	0.00106559	1	1	1	YPL063W	1	1517.71	High	0.0009108	0.002248	2.98
	High	IQQEQMGGQTFTLK		0.00309354	0.00106559	1	1	1	YPL063W	0	1608.81	High	0.0009108	0.001588	2.78
	High	DYVEGNLPSPEEQMK	1xOxidation [M14]	0.00488787	0.00106559	1	1	1	YPL063W	0	1751.78	High	0.0009108	0.002031	1.96
	High	AGVDVDEK		0.00538899	0.00106559	1	1	1	YPL063W	0	832.405	High	0.0009108	0.002153	2.52
	High	SILTDDMLFK	1xOxidation [M7]	0.0110101	0.00106559	1	1	1	YPL063W	0	1198.6	High	0.00103	0.003728	2.27
	High	LDPIHAFVSYNLFK		0.0179632	0.00210976	1	1	1	YPL063W	0	1663.88	High	0.001767	0.006039	2.09
	High	DIDNGYTLSLMYK	1xOxidation [M11]	0.0295047	0.00216078	1	1	1	YPL063W	0	1548.73	High	0.001783	0.01064	2.19
	High	NYLMFMK	2xOxidation [M4; M6]	0.0325253	0.00291415	1	1	1	YPL063W	0	978.442	High	0.00233	0.01194	1.84
High	Master Protein	YGL055W	OLE1 SGDID:S000003023, Chr VII from 398628-400160, Genome Release 64-2-1, Verified ORF, "Delta(9) fatty acid desaturase; required for monounsaturated fatty acid synthesis and for normal distribution of mitochondria"	0	55.315	32	12	22	12	1	510	58.4	8.95	47.56	12
	Confidence	Sequence	Modifications	Qvality PEP	Qvality q-value	# Protein Groups	# Proteins	# PSMs	Master Protein Accessions	# Missed Cleavages	Theo. MH+ [Da]	Confidence (by Search Engine): Sequest HT	Percolator q-Value (by Search Engine): Sequest HT	Percolator PEP (by Search Engine): Sequest HT	XCorr (by Search Engine): Sequest HT
	High	HSNAAQNVLADMR	1xOxidation [M12]	0.000191888	0	1	1	1	YGL055W	0	1442.68	High	0	0.000596	3.41
	High	FSQNAIEEALIQQEQK		5.11946e-08	0	1	1	2	YGL055W	0	1875.94	High	0	0.0002043	5.03
	High	GLVIISGIVHDVSGYISEHPGGETLIK		0.001348	0.000649755	1	1	2	YGL055W	0	2790.5	High	0.0004637	0.00112	2.47
	High	INWGPVLTDLPMWDK	1xOxidation [M12]	0.000816999	0.000649755	1	1	3	YGL055W	0	1800.9	High	0.0004637	0.0009389	3.3
	High	ADITDMTDDWTIR		0.00157721	0.000649755	1	1	1	YGL055W	0	1552.69	High	0.0004637	0.001189	2.57
	High	IVNGFGSLMGSK		0.0032358	0.00106559	1	1	1	YGL055W	0	1209.63	High	0.0009108	0.001625	2.66
	High	EMVSVEFDK		0.00191585	0.00106559	1	1	1	YGL055W	0	1083.5	High	0.0008405	0.001286	1.95
	High	EMVSVEFDK	1xOxidation [M2]	0.00295757	0.00106559	1	1	1	YGL055W	0	1099.5	High	0.0009108	0.001553	2.69
	High	ADITDMTDDWTIR	1xOxidation [M6]	0.00530866	0.00106559	1	1	1	YGL055W	0	1568.69	High	0.0009108	0.002129	2.01
	High	DDSASSGIVDEVDLTEANILATGLNK		0.00287026	0.00106559	1	1	1	YGL055W	0	2647.29	High	0.0009108	0.001531	2.1
	High	EMVSVEFDKK	1xOxidation [M2]	0.0114325	0.00106559	1	1	1	YGL055W	1	1227.59	High	0.00103	0.003847	2.54
	High	HSNAAQNVLADMR		0.00282759	0.00106559	1	1	2	YGL055W	0	1426.69	High	0.0009108	0.001523	2.98
	High	WYQYDPTK		0.013291	0.00132229	1	1	1	YGL055W	0	1100.5	High	0.001205	0.004426	2.03
	High	INWGPVLTDLPMWDK		0.017041	0.00191257	1	1	1	YGL055W	0	1784.9	High	0.001767	0.005706	1.32
	High	GLWYSHMGWMLLKPNPK	2xOxidation [M7; M10]	0.0612092	0.00669503	1	1	2	YGL055W	0	2090.04	High	0.005278	0.02676	2.59
	High	GEIYETGK		0.064444	0.00687016	1	1	1	YGL055W	0	896.436	High	0.0054	0.02855	1.28
High	Master Protein	YLR175W	CBF5 SGDID:S000004165, Chr XII from 506134-507585, Genome Release 64-2-1, Verified ORF, "Pseudouridine synthase catalytic subunit of box H/ACA snoRNPs; acts on large and small rRNAs, on snRNA U2, and on some mRNAs; mutations in human ortholog dyskerin cause the disorder dyskeratosis congenita; small nucleolar ribonucleoprotein particles are also known as snoRNPs"	0	54.835	52	17	20	17	1	483	54.7	8.9	47.36	17
	Confidence	Sequence	Modifications	Qvality PEP	Qvality q-value	# Protein Groups	# Proteins	# PSMs	Master Protein Accessions	# Missed Cleavages	Theo. MH+ [Da]	Confidence (by Search Engine): Sequest HT	Percolator q-Value (by Search Engine): Sequest HT	Percolator PEP (by Search Engine): Sequest HT	XCorr (by Search Engine): Sequest HT
	High	EDFVIKPEAAGASTDTSEWPLLLK		2.10435e-05	0	1	1	1	YLR175W	0	2617.34	High	0	0.0002315	5.31
	High	SGHYTPIPAGSSPLKR		1.31464e-05	0	1	1	1	YLR175W	1	1667.89	High	0	0.0001849	4.02
	High	SLENLTGALFQRPPLISAVK		0.000145566	0	1	1	1	YLR175W	0	2154.23	High	0	0.0005376	3.64
	High	EYVPLDNAEQSTSSSQETK		6.98699e-07	0	1	1	1	YLR175W	0	2112.96	High	0	4.365e-05	4.41
	High	TIYESNLIEFDNKR		0.000131117	0	1	1	1	YLR175W	1	1741.88	High	0	0.0005173	3.09
	High	SYISSGVINLDKPSNPSSHEVVAWIK		1.2384e-05	0	1	1	1	YLR175W	0	2827.46	High	0	0.0001797	3.42
	High	SIIQPLETLLVGYK		0.000323631	0.000649755	1	1	1	YLR175W	0	1573.92	High	0.0004637	0.000706	2.37
	High	TLCVHLGMLLGVGGHMQELR	1xCarbamidomethyl [C3]; 2xOxidation [M8; M16]	0.00142043	0.000649755	1	1	2	YLR175W	0	2253.13	High	0.0004637	0.001143	3.33
	High	EVETEKEEVKEDDSK		0.00109342	0.000649755	1	1	1	YLR175W	2	1793.83	High	0.0004637	0.001038	3.57
	High	SGHYTPIPAGSSPLK		0.00297981	0.00106559	1	1	2	YLR175W	0	1511.79	High	0.0009108	0.001558	2.43
	High	DSAVNAVCYGAK	1xCarbamidomethyl [C8]	0.00755746	0.00106559	1	1	1	YLR175W	0	1254.58	High	0.00103	0.002719	2.86
	High	NLGVFWASCEAGTYMR	1xCarbamidomethyl [C9]; 1xOxidation [M15]	0.00270334	0.00106559	1	1	1	YLR175W	0	1877.83	High	0.0009108	0.001491	2.1
	High	VNENTPEQWK		0.00411311	0.00106559	1	1	2	YLR175W	0	1244.59	High	0.0054	0.02884	2.34
	High	LMIPGLLR	1xOxidation [M2]	0.00990866	0.00106559	1	1	1	YLR175W	0	928.565	High	0.00103	0.003387	1.53
	High	GEAIAVAIAQMSTVDLASCDHGVVASVK	1xCarbamidomethyl [C19]	0.0024343	0.00106559	1	1	1	YLR175W	0	2799.4	High	0.0009108	0.001427	2.32
	High	VNENTPEQWKK		0.0151065	0.00162885	1	1	1	YLR175W	1	1372.69	High	0.001424	0.005039	2.14
	High	EYVCIVR	1xCarbamidomethyl [C4]	0.0277854	0.00216078	1	1	1	YLR175W	0	938.476	High	0.001783	0.009856	1.59
High	Master Protein	IPI00431749 IPI:IPI00431749.1	TREMBL:Q6P1A5;Q6KB66 Tax_Id=9606 Keratin b20	0	54.805	43	19	33	18	1	452	50.5	5.67	74.56	19
	Confidence	Sequence	Modifications	Qvality PEP	Qvality q-value	# Protein Groups	# Proteins	# PSMs	Master Protein Accessions	# Missed Cleavages	Theo. MH+ [Da]	Confidence (by Search Engine): Sequest HT	Percolator q-Value (by Search Engine): Sequest HT	Percolator PEP (by Search Engine): Sequest HT	XCorr (by Search Engine): Sequest HT
	High	GQLEANLLQVLEK		2.86567e-06	0	1	1	1	IPI00431749 IPI:IPI00431749.1	0	1454.82	High	0	8.814e-05	4.23
	High	LAQLEAALQQAK		2.87956e-05	0	1	1	1	IPI00431749 IPI:IPI00431749.1	0	1283.73	High	0	0.0002673	3.59
	High	LALDLEIATYR		2.81577e-05	0	2	7	28	IPI00431749 IPI:IPI00431749.1; IPI00556624 IPI:IPI00556624.1	0	1277.71	High	0	0.0002646	3.57
	High	TAEEQGELAFQDAK		9.03016e-08	0	1	1	1	IPI00431749 IPI:IPI00431749.1	0	1536.72	High	0	1.581e-05	4.63
	High	SLEEAEAYSR		0.000256757	0.000649755	1	1	1	IPI00431749 IPI:IPI00431749.1	0	1154.53	High	0.0004637	0.0006565	2.82
	High	MDSPSATVVSAVQSR		0.00175134	0.000649755	1	1	1	IPI00431749 IPI:IPI00431749.1	0	1534.75	High	0.0004637	0.001242	2.2
	High	TDMEFTFVQLK	1xOxidation [M3]	0.001348	0.000649755	1	1	1	IPI00431749 IPI:IPI00431749.1	0	1374.66	High	0.0004637	0.001121	2.63
	High	IRYEDEISKR		0.000433031	0.000649755	1	1	1	IPI00431749 IPI:IPI00431749.1	2	1308.69	High	0.0004637	0.0007708	3.34
	High	SEIADLNVR		0.00356694	0.00106559	1	1	1	IPI00431749 IPI:IPI00431749.1	0	1016.54	High	0.0009108	0.0017	2.37
	High	SLESFVELMK	1xOxidation [M9]	0.00481504	0.00106559	1	1	1	IPI00431749 IPI:IPI00431749.1	0	1198.6	High	0.0009108	0.002008	2.74
	High	SQLEEQAAR		0.0125138	0.00132229	1	1	1	IPI00431749 IPI:IPI00431749.1	0	1031.51	High	0.001205	0.004205	1.99
	High	AQYDAVAAR		0.0233756	0.00216078	1	1	1	IPI00431749 IPI:IPI00431749.1	0	964.485	High	0.001783	0.008077	1.56
	High	VTVNPGLLVPLDVK		0.028848	0.00216078	1	1	1	IPI00431749 IPI:IPI00431749.1	0	1463.88	High	0.001783	0.01035	3.23
	High	YQELMNVK		0.0211981	0.00216078	1	1	1	IPI00431749 IPI:IPI00431749.1	0	1024.51	High	0.001783	0.007231	1.47
	High	TIYEQELK		0.0327699	0.00291415	1	1	1	IPI00431749 IPI:IPI00431749.1	0	1023.54	High	0.00233	0.01205	1.81
	High	VQALEQR		0.0342759	0.00335822	1	1	1	IPI00431749 IPI:IPI00431749.1	0	843.468	High	0.002654	0.01279	1.43
	High	DVSVTVGMDSR	1xOxidation [M8]	0.0392136	0.00377955	1	1	1	IPI00431749 IPI:IPI00431749.1	0	1181.55	High	0.002962	0.01509	1.87
	High	SQILSVK		0.0419372	0.00466421	1	1	1	IPI00431749 IPI:IPI00431749.1	0	774.472	High	0.003615	0.01643	1.95
	High	SLESFVELMK		0.0425671	0.00466421	1	1	1	IPI00431749 IPI:IPI00431749.1	0	1182.61	High	0.003615	0.01666	1.87
	High	NQLLETR		0.0635035	0.00669503	1	1	1	IPI00431749 IPI:IPI00431749.1	0	873.479	High	0.005278	0.02793	2.08
High	Master Protein	YLR432W	IMD3 SGDID:S000004424, Chr XII from 1002557-1004128, Genome Release 64-2-1, Verified ORF, "Inosine monophosphate dehydrogenase; catalyzes the rate-limiting step in the de novo synthesis of GTP; member of a four-gene family in S. cerevisiae, constitutively expressed; IMD3 has a paralog, IMD4, that arose from the whole genome duplication"	0	54.689	34	13	20	4	1	523	56.5	7.4	58.48	13
	Confidence	Sequence	Modifications	Qvality PEP	Qvality q-value	# Protein Groups	# Proteins	# PSMs	Master Protein Accessions	# Missed Cleavages	Theo. MH+ [Da]	Confidence (by Search Engine): Sequest HT	Percolator q-Value (by Search Engine): Sequest HT	Percolator PEP (by Search Engine): Sequest HT	XCorr (by Search Engine): Sequest HT
	High	NPVTGAQGITLSEGNEILK		0.000180761	0	2	3	2	YLR432W; YHR216W	0	1941.03	High	0	0.0005823	4.21
	High	QLLCGAAIGTIDADKER	1xCarbamidomethyl [C4]	1.3083e-06	0	1	1	1	YLR432W	1	1830.94	High	0	5.962e-05	4.63
	High	FGFSGFPVTEDGK		1.69461e-05	0	2	2	1	YLR432W; YML056C	0	1387.65	High	0	0.0002087	3.66
	High	ETFPDLEIIAGNVATR		9.65374e-05	0	2	2	2	YLR432W; YML056C	0	1745.91	High	0	0.0004575	3.23
	High	EQAANLIAAGADGLR		6.49854e-05	0	3	4	2	YLR432W; YML056C; YHR216W	0	1469.77	High	0	0.0003869	4.42
	High	LDGLSVQELMDSK	1xOxidation [M10]	3.99963e-05	0	1	1	1	YLR432W	0	1450.71	High	0	0.0003109	3.03
	High	YFSESDSVLVAQGVSGAVVDK		1.07742e-06	0	3	4	1	YLR432W; YML056C; YHR216W	0	2157.07	High	0	5.422e-05	5.24
	High	TASAQLEGGVHNLHSYEK		3.25355e-06	0	3	3	2	YLR432W; YML056C; YHR216W	0	1940.95	High	0	9.353e-05	4.09
	High	NQNYPLASK		0.00127926	0.000649755	3	3	2	YLR432W; YML056C; YHR216W	0	1034.53	High	0.0004637	0.001098	2.37
	High	LLIVDDNGNLVSMLSR	1xOxidation [M13]	0.000575118	0.000649755	2	2	2	YLR432W; YML056C	0	1774.94	High	0.0004637	0.0008392	3.15
	High	FGFSGFPVTEDGKR		0.00107719	0.000649755	1	1	1	YLR432W	1	1543.75	High	0.0004637	0.001032	3.25
	High	GMGSIDAMQK	2xOxidation [M2; M8]	0.00282759	0.00106559	3	4	1	YLR432W; YML056C; YHR216W	0	1069.47	High	0.0009108	0.001522	1.95
	High	LLIVDDNGNLVSMLSR		0.014439	0.00132229	2	2	1	YLR432W; YML056C	0	1758.94	High	0.001205	0.004828	1.73
	High	LMGIVTSR	1xOxidation [M2]	0.0162881	0.00191257	1	1	1	YLR432W	0	892.492	High	0.001627	0.005425	2.12
High	Master Protein	YNL175C	NOP13 SGDID:S000005119, Chr XIV from 308612-307401, Genome Release 64-2-1, reverse complement, Verified ORF, "Nucleolar protein found in preribosomal complexes; contains an RNA recognition motif (RRM); relative distribution to the nucleolus increases upon DNA replication stress"	0	54.65	48	21	23	21	1	403	45.6	9.29	44.89	21
	Confidence	Sequence	Modifications	Qvality PEP	Qvality q-value	# Protein Groups	# Proteins	# PSMs	Master Protein Accessions	# Missed Cleavages	Theo. MH+ [Da]	Confidence (by Search Engine): Sequest HT	Percolator q-Value (by Search Engine): Sequest HT	Percolator PEP (by Search Engine): Sequest HT	XCorr (by Search Engine): Sequest HT
	High	NNSSSFDISNNK		4.15178e-05	0	1	1	1	YNL175C	0	1326.59	High	0	0.0003162	3.51
	High	SSVALATAQR		0.000615103	0.000649755	1	1	1	YNL175C	0	1003.55	High	0.0004637	0.0008563	2.95
	High	KAEDEIEIDLK		0.000554039	0.000649755	1	1	1	YNL175C	1	1302.68	High	0.0004637	0.0008287	3.12
	High	NEEGSTNALKDK		0.00106917	0.000649755	1	1	1	YNL175C	1	1305.63	High	0.0004637	0.001029	2.95
	High	DAQGEESTINTPTGDESGEVVKK		0.0011266	0.000649755	1	1	1	YNL175C	1	2391.12	High	0.0004637	0.001049	2.49
	High	RKAEDEIEIDLK		0.00670087	0.00106559	1	1	1	YNL175C	2	1458.78	High	0.0009108	0.002492	2.97
	High	NEEGSTNALK		0.00224188	0.00106559	1	1	1	YNL175C	0	1062.51	High	0.0008405	0.001376	2.02
	High	AEDEIEIDLK		0.00503686	0.00106559	1	1	1	YNL175C	0	1174.58	High	0.0009108	0.002067	2.4
	High	VTLEELNAK		0.00180454	0.00106559	1	1	1	YNL175C	0	1016.56	High	0.0008405	0.001255	2.61
	High	VTEQDITR		0.00563738	0.00106559	1	1	1	YNL175C	0	961.495	High	0.0009108	0.002218	2.07
	High	AVLELSESHLNGR		0.00224188	0.00106559	1	1	1	YNL175C	0	1424.75	High	0.0008405	0.001375	2.41
	High	GFAFIDFK		0.0083338	0.00106559	1	1	1	YNL175C	0	944.488	High	0.00103	0.002948	1.9
	High	SSIPLSK		0.0172995	0.00210976	1	1	1	YNL175C	0	731.43	High	0.001767	0.005783	2.15
	High	MEYGEDR		0.0189352	0.00210976	1	1	1	YNL175C	0	899.356	High	0.001767	0.006385	1.43
	High	YGVWIGNLSFDTTKDDLVR		0.0239088	0.00216078	1	1	1	YNL175C	1	2199.11	High	0.001783	0.008254	2.36
	High	ALLDPTK		0.0345334	0.00335822	1	1	1	YNL175C	0	757.445	High	0.002654	0.01293	2.16
	High	SIEEYKEDAEK		0.0383448	0.00354048	1	1	2	YNL175C	1	1340.62	High	0.00279	0.01469	2.26
	High	MATFEDSGK	1xOxidation [M1]	0.0366633	0.00354048	1	1	1	YNL175C	0	1001.42	High	0.00279	0.01391	2.18
	High	GSAAIVPSQGK		0.0410094	0.00422195	1	1	1	YNL175C	0	1014.56	High	0.003294	0.01587	2.36
	High	MEYGEDR	1xOxidation [M1]	0.05439	0.00576207	1	1	1	YNL175C	0	915.351	High	0.00459	0.02293	1.44
	High	GFCYMFFK	1xCarbamidomethyl [C3]; 1xOxidation [M5]	0.0577028	0.0063287	1	1	1	YNL175C	0	1115.47	High	0.004998	0.0247	1.53
	High	RPPVDSNNR		0.0714097	0.00801993	1	1	1	YNL175C	0	1054.54	High	0.006391	0.03304	1.31
High	Master Protein	YJL138C	TIF2 SGDID:S000003674, Chr X from 154691-153504, Genome Release 64-2-1, reverse complement, Verified ORF, "Translation initiation factor eIF4A; DEA(D/H)-box RNA helicase that couples ATPase activity to RNA binding and unwinding; forms a dumbbell structure of two compact domains connected by a linker; interacts with eIF4G; protein abundance increases in response to DNA replication stress; TIF2 has…	0	52.686	46	16	20	16	1	395	44.7	5.12	49.49	16
	Confidence	Sequence	Modifications	Qvality PEP	Qvality q-value	# Protein Groups	# Proteins	# PSMs	Master Protein Accessions	# Missed Cleavages	Theo. MH+ [Da]	Confidence (by Search Engine): Sequest HT	Percolator q-Value (by Search Engine): Sequest HT	Percolator PEP (by Search Engine): Sequest HT	XCorr (by Search Engine): Sequest HT
	High	FDDMELDENLLR	1xOxidation [M4]	5.55537e-05	0	1	1	2	YJL138C	0	1525.68	High	0	0.0003603	3.02
	High	AIMPIIEGHDVLAQAQSGTGK	1xOxidation [M3]	5.73891e-06	0	1	1	1	YJL138C	0	2152.11	High	0	0.0001237	4.16
	High	VHACIGGTSFVEDAEGLR	1xCarbamidomethyl [C4]	2.51739e-05	0	1	1	1	YJL138C	0	1917.91	High	0	0.0002518	4.22
	High	VVYKFDDMELDENLLR	1xOxidation [M8]	5.94155e-05	0	1	1	1	YJL138C	1	2014.98	High	0	0.0003721	3.8
	High	GIDVQQVSLVINYDLPANK		0.000920743	0.000649755	1	1	1	YJL138C	0	2086.12	High	0.0004637	0.0009767	3.92
	High	APQALMLAPTR		0.000854455	0.000649755	1	1	1	YJL138C	0	1168.65	High	0.0004637	0.0009528	3.08
	High	AIMPIIEGHDVLAQAQSGTGK		0.000841782	0.000649755	1	1	1	YJL138C	0	2136.11	High	0.0004637	0.0009483	2.92
	High	QFYVNVEEEEYK		0.00885085	0.00106559	1	1	1	YJL138C	0	1576.72	High	0.00103	0.003088	1.32
	High	ELALQIQK		0.00551178	0.00106559	1	1	1	YJL138C	0	942.562	High	0.0009108	0.00218	2.62
	High	DAQIVVGTPGR		0.00827134	0.00106559	1	1	1	YJL138C	0	1112.61	High	0.00103	0.002922	2.42
	High	TGTFSIAALQR		0.00326013	0.00106559	1	1	1	YJL138C	0	1164.64	High	0.0009108	0.001625	2.24
	High	FTVSAIYSDLPQQER		0.0049247	0.00106559	1	1	1	YJL138C	0	1753.88	High	0.0009108	0.002038	2.24
	High	GVAINFVTNEDVGAMR	1xOxidation [M15]	0.00245259	0.00106559	1	1	1	YJL138C	0	1708.83	High	0.0009108	0.001429	1.92
	High	ILISTDLLAR		0.00335934	0.00106559	1	1	1	YJL138C	0	1114.68	High	0.0009108	0.00165	2.2
	High	FDDMELDENLLR		0.0123267	0.00132229	1	1	1	YJL138C	0	1509.69	High	0.001205	0.004123	2.16
	High	APQALMLAPTR	1xOxidation [M6]	0.0154517	0.00162885	1	1	1	YJL138C	0	1184.65	High	0.001424	0.005156	1.65
	High	KVEELTTK		0.017041	0.00191257	1	1	1	YJL138C	1	947.541	High	0.001767	0.005708	2.31
	High	VEELTTK		0.0277854	0.00216078	1	1	1	YJL138C	0	819.446	High	0.001783	0.009851	1.53
	High	ENYIHR		0.0673461	0.00705222	1	1	1	YJL138C	0	831.411	High	0.005639	0.03047	1.85
High	Master Protein	YOR204W	DED1 SGDID:S000005730, Chr XV from 722911-724725, Genome Release 64-2-1, Verified ORF, "ATP-dependent DEAD (Asp-Glu-Ala-Asp)-box RNA helicase; required for translation initiation of all yeast mRNAs; binds to mRNA cap-associated factors, and binding stimulates Ded1p RNA-dependent ATPase activity; mutation in human homolog DBY is associated with male infertility; human homolog DDX3X complements ded…	0	51.662	38	18	22	18	1	604	65.5	7.83	46.28	18
	Confidence	Sequence	Modifications	Qvality PEP	Qvality q-value	# Protein Groups	# Proteins	# PSMs	Master Protein Accessions	# Missed Cleavages	Theo. MH+ [Da]	Confidence (by Search Engine): Sequest HT	Percolator q-Value (by Search Engine): Sequest HT	Percolator PEP (by Search Engine): Sequest HT	XCorr (by Search Engine): Sequest HT
	High	MADQLTDFLIMQNFR	2xOxidation [M1; M11]	0.00021786	0	1	1	2	YOR204W	0	1874.88	High	0	0.0006213	2.51
	High	QTLMFSATFPADIQHLAR	1xOxidation [M4]	6.38813e-07	0	1	1	1	YOR204W	0	2063.04	High	0	4.18e-05	3.96
	High	YLVLDEADR		0.00163731	0.000649755	1	2	1	YOR204W	0	1093.55	High	0.0004637	0.001208	2.54
	High	DLMACAQTGSGK	1xCarbamidomethyl [C5]; 1xOxidation [M3]	0.000693183	0.000649755	1	2	1	YOR204W	0	1254.55	High	0.0004637	0.0008896	2.27
	High	LNDLLER		0.0111772	0.00106559	1	2	1	YOR204W	0	872.484	High	0.00103	0.00377	2.16
	High	MLDMGFEPQIR	1xOxidation [M1]	0.00402159	0.00106559	1	3	1	YOR204W	0	1352.63	High	0.0009108	0.001812	2.51
	High	VLYVENQDKK		0.0083338	0.00106559	1	1	2	YOR204W	1	1235.66	High	0.00103	0.002932	2.28
	High	ACVVYGGSPIGNQLR	1xCarbamidomethyl [C2]	0.00496181	0.00106559	1	1	1	YOR204W	0	1590.81	High	0.0009108	0.002049	2.35
	High	AYPTAVIMAPTR		0.0043675	0.00106559	1	1	1	YOR204W	0	1290.69	High	0.0009108	0.001896	2.65
	High	HIVEDCDMTPVGER	1xCarbamidomethyl [C6]; 1xOxidation [M8]	0.0134927	0.00132229	1	1	2	YOR204W	0	1673.73	High	0.001205	0.004508	2.43
	High	TGGFLFPVLSESFK		0.0165353	0.00191257	1	1	1	YOR204W	0	1528.8	High	0.001627	0.005525	2.24
	High	GLHEILTEANQEVPSFLK		0.0165353	0.00191257	1	1	1	YOR204W	0	2025.07	High	0.001627	0.005505	2.34
	High	TGPSPQPESQGSFYQR		0.0295047	0.00216078	1	1	1	YOR204W	0	1765.81	High	0.001783	0.01062	1.99
	High	DVPEPITEFTSPPLDGLLLENIK		0.0232005	0.00216078	1	1	1	YOR204W	0	2537.34	High	0.001783	0.007981	1.91
	High	AGGASAGGWGSSR		0.0325253	0.00291415	1	1	1	YOR204W	0	1120.51	High	0.00233	0.01201	1.76
	High	ELATQIFDEAK		0.0369384	0.00354048	1	1	1	YOR204W	0	1264.64	High	0.00279	0.01401	1.82
	High	KAYPTAVIMAPTR	1xOxidation [M9]	0.046892	0.0050128	1	1	1	YOR204W	1	1434.78	High	0.003872	0.01887	3.39
	High	KAYPTAVIMAPTR		0.0568568	0.0063287	1	1	1	YOR204W	1	1418.78	High	0.004998	0.02434	2.81
	High	FTKPTPVQK		0.0762589	0.00846887	1	1	1	YOR204W	0	1045.6	High	0.006561	0.03616	1.56
High	Master Protein	YFL037W	TUB2 SGDID:S000001857, Chr VI from 56336-57709, Genome Release 64-2-1, Verified ORF, "Beta-tubulin; associates with alpha-tubulin (Tub1p and Tub3p) to form tubulin dimer, which polymerizes to form microtubules; mutation in human ortholog is associated with congenital fibrosis of the extraocular muscles (CFEOM) with polymicrogyria"	0	51.22	44	15	20	15	1	457	50.9	4.75	53.15	15
	Confidence	Sequence	Modifications	Qvality PEP	Qvality q-value	# Protein Groups	# Proteins	# PSMs	Master Protein Accessions	# Missed Cleavages	Theo. MH+ [Da]	Confidence (by Search Engine): Sequest HT	Percolator q-Value (by Search Engine): Sequest HT	Percolator PEP (by Search Engine): Sequest HT	XCorr (by Search Engine): Sequest HT
	High	LNVYFNEASSGK		0.000202185	0	1	1	1	YFL037W	0	1328.65	High	0	0.0006063	2.77
	High	GHYTEGAELVDSVMDVIR	1xOxidation [M14]	1.90967e-05	0	1	1	2	YFL037W	0	2006.95	High	0	0.0002205	4.37
	High	LHFFMVGYAPLTAIGSQSFR	1xOxidation [M5]	2.98252e-07	0	1	1	1	YFL037W	0	2258.14	High	0	2.862e-05	4.75
	High	YLTVAAFFR		0.00137858	0.000649755	1	1	1	YFL037W	0	1087.59	High	0.0004637	0.001129	2.23
	High	SINVDLEPGTIDAVR		0.00146356	0.000649755	1	1	2	YFL037W	0	1598.84	High	0.0004637	0.001155	3.2
	High	NSAIGNLFRPDNYIFGQSSAGNVWAK		0.000583773	0.000649755	1	1	1	YFL037W	0	2826.4	High	0.0004637	0.0008436	3.56
	High	MMATFSVLPSPK	2xOxidation [M1; M2]	0.000525821	0.000649755	1	1	1	YFL037W	0	1340.66	High	0.0004637	0.0008171	3.46
	High	VGDQFSAMFK		0.00111821	0.000649755	1	1	1	YFL037W	0	1129.53	High	0.0004637	0.001045	2.25
	High	LNQPSYGDLNNLVSSVMSGVTTSLR	1xOxidation [M17]	0.0047433	0.00106559	1	1	1	YFL037W	0	2668.32	High	0.0009108	0.001987	2.75
	High	NMMAAADPR	2xOxidation [M2; M3]	0.00711623	0.00106559	1	1	1	YFL037W	0	1008.42	High	0.00103	0.002599	1.37
	High	MMATFSVLPSPK	1xOxidation [M2]	0.0068537	0.00106559	1	1	1	YFL037W	0	1324.66	High	0.00103	0.002538	2.37
	High	SLTVPELTQQMFDAK	1xOxidation [M11]	0.00481504	0.00106559	1	1	2	YFL037W	0	1723.86	High	0.006477	0.0336	2.15
	High	KLAVNLVPFPR		0.00919023	0.00106559	1	1	1	YFL037W	1	1253.77	High	0.00103	0.003177	2.65
	High	NMMAAADPR	1xOxidation [M3]	0.0131913	0.00132229	1	1	1	YFL037W	0	992.429	High	0.001205	0.004423	2.3
	High	LAVNLVPFPR		0.0185124	0.00210976	1	1	1	YFL037W	0	1125.68	High	0.001767	0.006244	2.54
	High	IREEFPDR		0.0286323	0.00216078	1	1	1	YFL037W	1	1061.54	High	0.001783	0.01026	2.59
	High	YPGQLNSDLR		0.0355827	0.00335822	1	1	1	YFL037W	0	1162.59	High	0.002654	0.0134	2.21
High	Master Protein	YKR016W	MIC60 SGDID:S000001724, Chr XI from 469717-471339, Genome Release 64-2-1, Verified ORF, "Component of the MICOS complex; MICOS (formerly MINOS or MitOS) is a mitochondrial inner membrane complex that extends into the intermembrane space and has a role in the maintenance of crista junctions, inner membrane architecture, and formation of contact sites to the outer membrane; Mic60p is also involved …	0	50.92	36	16	19	16	1	540	61	6.6	46.26	16
	Confidence	Sequence	Modifications	Qvality PEP	Qvality q-value	# Protein Groups	# Proteins	# PSMs	Master Protein Accessions	# Missed Cleavages	Theo. MH+ [Da]	Confidence (by Search Engine): Sequest HT	Percolator q-Value (by Search Engine): Sequest HT	Percolator PEP (by Search Engine): Sequest HT	XCorr (by Search Engine): Sequest HT
	High	NLLQEVDEFKENLTK		7.89104e-05	0	1	1	1	YKR016W	1	1819.94	High	0	0.0004204	3.66
	High	INNNNLPDVNIDKELSR		1.05867e-05	0	1	1	1	YKR016W	1	1968.01	High	0	0.0001668	4.08
	High	INNNNLPDVNIDK		6.04687e-06	0	1	1	1	YKR016W	0	1482.75	High	0	0.000127	3.97
	High	LLSNLLSTFNK		0.000184856	0	1	1	1	YKR016W	0	1249.72	High	0	0.0005873	3.24
	High	ILSNEQIYNR		0.000114626	0	1	1	1	YKR016W	0	1249.65	High	0	0.0004897	3.29
	High	HANEVGLLSITQVK		2.87956e-05	0	1	1	2	YKR016W	0	1508.84	High	0	0.0002678	3.72
	High	TSEVITELNTQYENSK		0.000227843	0	1	1	2	YKR016W	0	1855.89	High	0	0.0006308	2.64
	High	SNDLLSGLTGSSQTR		0.000211449	0	1	1	1	YKR016W	0	1535.77	High	0	0.0006163	3.2
	High	VSNLNDAVEEVVSLK		0.000335941	0.000649755	1	1	1	YKR016W	0	1615.85	High	0.0004637	0.0007139	2.22
	High	EALSNYMIQR	1xOxidation [M7]	0.00106917	0.000649755	1	1	2	YKR016W	0	1240.6	High	0.0004637	0.00103	2.55
	High	VCESWIEDAR	1xCarbamidomethyl [C2]	0.00563738	0.00106559	1	1	1	YKR016W	0	1264.56	High	0.0009108	0.002216	2.38
	High	WNLLADDFK		0.0024343	0.00106559	1	1	1	YKR016W	0	1121.56	High	0.0009108	0.001423	1.94
	High	ENIEVK		0.019514	0.00210976	1	1	1	YKR016W	0	731.393	High	0.001767	0.006575	2.2
	High	VFSLFLFTK		0.0228542	0.00216078	1	1	1	YKR016W	0	1101.63	High	0.001783	0.007871	1.54
	High	ILSLEPLNIETENSDPQLK		0.0355827	0.00335822	1	1	1	YKR016W	0	2153.13	High	0.002654	0.01331	2.72
	High	SNQNMLTNLSQLNETLK		0.0401017	0.00398433	1	1	1	YKR016W	0	1947.98	High	0.003118	0.01556	1.16
High	Master Protein	sp	CATA_HUMAN	0	50.77	40	19	20	19	1	526	59.6	7.39	48.07	19
	Confidence	Sequence	Modifications	Qvality PEP	Qvality q-value	# Protein Groups	# Proteins	# PSMs	Master Protein Accessions	# Missed Cleavages	Theo. MH+ [Da]	Confidence (by Search Engine): Sequest HT	Percolator q-Value (by Search Engine): Sequest HT	Percolator PEP (by Search Engine): Sequest HT	XCorr (by Search Engine): Sequest HT
	High	GPLLVQDVVFTDEMAHFDR		1.28552e-05	0	1	1	1	sp	0	2189.07	High	0	0.0001831	3.91
	High	AFYVNVLNEEQR		0.00069838	0.000649755	1	1	1	sp	0	1481.74	High	0.0004637	0.0008908	3.31
	High	GAGAFGYFEVTHDITK		0.000351334	0.000649755	1	1	1	sp	0	1712.83	High	0.0004637	0.0007237	3.4
	High	DPILFPSFIHSQK		0.00456862	0.00106559	1	1	1	sp	0	1528.82	High	0.0009108	0.001946	2.8
	High	RFNTANDDNVTQVR		0.0055952	0.00106559	1	1	1	sp	1	1649.8	High	0.0009108	0.002208	2.32
	High	LSQEDPDYGIR		0.00262356	0.00106559	1	1	1	sp	0	1292.61	High	0.0009108	0.001474	2.46
	High	LNVITVGPR		0.00858842	0.00106559	1	1	1	sp	0	968.589	High	0.00103	0.00301	2.41
	High	NLSVEDAAR		0.00947111	0.00106559	1	1	1	sp	0	974.49	High	0.00103	0.00326	1.9
	High	DAQIFIQK		0.00252715	0.00106559	1	1	1	sp	0	962.531	High	0.0009108	0.001446	2.65
	High	GPLLVQDVVFTDEMAHFDR	1xOxidation [M14]	0.00201887	0.00106559	1	1	1	sp	0	2205.06	High	0.0008405	0.001317	3.03
	High	LFAYPDTHR		0.00362082	0.00106559	1	1	1	sp	0	1119.56	High	0.0009108	0.001718	2.04
	High	FSTVAGESGSADTVRDPR		0.00423839	0.00106559	1	1	1	sp	1	1851.88	High	0.0009108	0.00187	2.42
	High	ADVLTTGAGNPVGDKLNVITVGPR		0.0120514	0.00132229	1	1	1	sp	1	2364.29	High	0.001205	0.004051	2.49
	High	DLFNAIATGK		0.0171698	0.00210976	1	1	1	sp	0	1049.56	High	0.001767	0.005742	1.84
	High	FSTVAGESGSADTVR		0.0228542	0.00216078	1	1	1	sp	0	1483.7	High	0.001783	0.007852	1.48
	High	VWPHKDYPLIPVGK		0.0218457	0.00216078	1	1	1	sp	1	1648.92	High	0.001783	0.007444	2.63
	High	ADSRDPASDQMQHWK	1xAcetyl [N-Term]; 1xOxidation [M11]	0.0233756	0.00216078	1	1	1	sp	1	1829.79	High	0.001783	0.008072	2.7
	High	ADVLTTGAGNPVGDK		0.0223443	0.00216078	1	1	1	sp	0	1414.72	High	0.001783	0.007669	1.61
	High	NFTEVHPDYGSHIQALLDK		0.0465447	0.0050128	1	1	1	sp	0	2184.07	High	0.003872	0.01868	2.44
	High	DPASDQMQHWK	1xOxidation [M7]	0.0564384	0.00621096	1	1	1	sp	0	1358.58	High	0.00491	0.02408	1.71
High	Master Protein	IPI00166205 IPI:IPI00166205.2	TREMBL:Q7RTT2 ENSEMBL:ENSP00000352479 Tax_Id=9606 Keratin 5b	0	50.399	31	18	19	15	1	521	56.9	6.02	48.31	18
	Confidence	Sequence	Modifications	Qvality PEP	Qvality q-value	# Protein Groups	# Proteins	# PSMs	Master Protein Accessions	# Missed Cleavages	Theo. MH+ [Da]	Confidence (by Search Engine): Sequest HT	Percolator q-Value (by Search Engine): Sequest HT	Percolator PEP (by Search Engine): Sequest HT	XCorr (by Search Engine): Sequest HT
	High	YLDFSSIITEVR		0.000179416	0	1	1	1	IPI00166205 IPI:IPI00166205.2	0	1442.75	High	0	0.0005815	2.58
	High	VQISQLHQEIQR		0.000139188	0	1	1	1	IPI00166205 IPI:IPI00166205.2	0	1478.81	High	0	0.0005282	2.88
	High	KQNASLQAAITDAEQR		0.000252951	0.000649755	1	1	1	IPI00166205 IPI:IPI00166205.2	1	1743.9	High	0.0004637	0.000653	4.64
	High	IEIDPQFQVVR		0.000703616	0.000649755	1	1	1	IPI00166205 IPI:IPI00166205.2	0	1343.73	High	0.0004637	0.0008945	2.71
	High	QNASLQAAITDAEQR		0.000920743	0.000649755	1	1	2	IPI00166205 IPI:IPI00166205.2	0	1615.8	High	0.0004637	0.001132	3.52
	High	LSLDVEIATYR		0.000804882	0.000649755	2	2	1	IPI00166205 IPI:IPI00166205.2; IPI00376379 IPI:IPI00376379.1	0	1279.69	High	0.0004637	0.0009334	3.15
	High	ATLENDFVVLKK		0.00104547	0.000649755	1	1	1	IPI00166205 IPI:IPI00166205.2	1	1376.78	High	0.0004637	0.001021	3.51
	High	LQSQTENLKK		0.00621573	0.00106559	1	1	1	IPI00166205 IPI:IPI00166205.2	1	1188.66	High	0.0009108	0.002365	2.95
	High	AEAEALYQTK		0.00200382	0.00106559	3	7	1	IPI00174775 IPI:IPI00174775.1; IPI00166205 IPI:IPI00166205.2; IPI00061200 IPI:IPI00061200.1	0	1123.56	High	0.0008405	0.001311	2.54
	High	ATLENDFVVLK		0.00351386	0.00106559	1	1	1	IPI00166205 IPI:IPI00166205.2	0	1248.68	High	0.0009108	0.001688	2.29
	High	GALDAELK		0.00607719	0.00106559	1	1	1	IPI00166205 IPI:IPI00166205.2	0	816.446	High	0.0009108	0.002332	2.27
	High	EYLYFLK		0.0138011	0.00132229	1	1	1	IPI00166205 IPI:IPI00166205.2	0	975.519	High	0.001205	0.004598	1.84
	High	TQETQEIR		0.014439	0.00132229	1	1	1	IPI00166205 IPI:IPI00166205.2	0	1004.5	High	0.001205	0.004807	1.65
	High	LLEGEECR	1xCarbamidomethyl [C7]	0.0153358	0.00162885	6	13	1	IPI00174775 IPI:IPI00174775.1; IPI00300725 IPI:IPI00300725.6; IPI00299145 IPI:IPI00299145.8; sp; IPI00009867 IPI:IPI00009867.2; IPI00166205 IPI:IPI00166205.2	0	1005.47	High	0.001424	0.005102	2.03
	High	DVDGVFLSK		0.018099	0.00210976	1	1	1	IPI00166205 IPI:IPI00166205.2	0	979.509	High	0.001767	0.006096	1.93
	High	VDELEAALR		0.0208815	0.00210976	1	1	1	IPI00166205 IPI:IPI00166205.2	0	1015.54	High	0.001783	0.007128	2.25
	High	SLNSFGGCLEGSR	1xCarbamidomethyl [C8]	0.042251	0.00466421	1	1	1	IPI00166205 IPI:IPI00166205.2	0	1383.63	High	0.003615	0.01655	1.64
	High	QLEQLQGER		0.0516425	0.00540776	1	1	1	IPI00166205 IPI:IPI00166205.2	0	1100.57	High	0.004311	0.02134	1.78
High	Master Protein	YGL078C	DBP3 SGDID:S000003046, Chr VII from 361859-360288, Genome Release 64-2-1, reverse complement, Verified ORF, "RNA-Dependent ATPase, member of DExD/H-box family; involved in cleavage of site A3 within the ITS1 spacer during rRNA processing; not essential for growth, but deletion causes severe slow-growth phenotype"	0	50.119	35	16	18	16	1	523	58.8	9.13	51.83	16
	Confidence	Sequence	Modifications	Qvality PEP	Qvality q-value	# Protein Groups	# Proteins	# PSMs	Master Protein Accessions	# Missed Cleavages	Theo. MH+ [Da]	Confidence (by Search Engine): Sequest HT	Percolator q-Value (by Search Engine): Sequest HT	Percolator PEP (by Search Engine): Sequest HT	XCorr (by Search Engine): Sequest HT
	High	ELASTFMNNPIK	1xOxidation [M7]	4.27767e-05	0	1	1	1	YGL078C	0	1380.68	High	0	0.0003215	3.7
	High	ITQIVEVVDPR		6.40221e-05	0	1	1	1	YGL078C	0	1268.72	High	0	0.0003837	3.76
	High	DVVGVAETGSGK		0.000103248	0	1	1	1	YGL078C	0	1118.57	High	0	0.0004696	3.14
	High	FPKPTPIQAVAWPYLLSGK		5.19428e-05	0	1	1	1	YGL078C	0	2113.18	High	0	0.00035	4.46
	High	VSIGNTDQLTANKR		0.000155685	0	1	1	1	YGL078C	1	1516.81	High	0	0.0005518	2.93
	High	VSIGNTDQLTANK		3.65682e-05	0	1	1	1	YGL078C	0	1360.71	High	0	0.0002993	3.49
	High	SNLLLATDVAAR		0.000752546	0.000649755	1	1	1	YGL078C	0	1243.7	High	0.0004637	0.000912	3.35
	High	ELASQIYDNLIVLTDK		0.00121404	0.000649755	1	1	2	YGL078C	0	1834.98	High	0.0004637	0.001077	3.46
	High	ELASTFMNNPIK		0.00701003	0.00106559	1	1	1	YGL078C	0	1364.69	High	0.00103	0.002581	2.86
	High	TQALNEFK		0.00846015	0.00106559	1	1	1	YGL078C	0	950.494	High	0.00103	0.002969	2.4
	High	TFAFGVPAISHLMNDQK	1xOxidation [M13]	0.00348762	0.00106559	1	1	1	YGL078C	0	1891.94	High	0.0009108	0.001684	3.1
	High	GIQVLVISPTR		0.00328466	0.00106559	1	1	1	YGL078C	0	1182.72	High	0.0009108	0.001635	2.87
	High	VGMQCCCVYGGVPK	3xCarbamidomethyl [C5; C6; C7]; 1xOxidation [M3]	0.0123267	0.00132229	1	1	1	YGL078C	0	1630.68	High	0.001205	0.004137	1.75
	High	SQVVVATPGR		0.0189352	0.00210976	1	1	1	YGL078C	0	1013.57	High	0.001767	0.00638	2.11
	High	GLDIPNVK		0.0320415	0.00239809	1	1	1	YGL078C	0	855.493	High	0.001955	0.01171	1.77
	High	VLIFALYK		0.0313291	0.00239809	1	1	1	YGL078C	0	966.602	High	0.001955	0.01139	1.92
	High	QTLMFTATWPK	1xOxidation [M4]	0.0572783	0.0063287	1	1	1	YGL078C	0	1339.67	High	0.004998	0.0245	2.54
High	Master Protein	YOR375C	GDH1 SGDID:S000005902, Chr XV from 1043042-1041678, Genome Release 64-2-1, reverse complement, Verified ORF, "NADP(+)-dependent glutamate dehydrogenase; synthesizes glutamate from ammonia and alpha-ketoglutarate; rate of alpha-ketoglutarate utilization differs from Gdh3p; expression regulated by nitrogen and carbon sources; GDH1 has a paralog, GDH3, that arose from the whole genome duplication"	0	49.857	46	16	18	16	1	454	49.5	5.69	46.71	16
	Confidence	Sequence	Modifications	Qvality PEP	Qvality q-value	# Protein Groups	# Proteins	# PSMs	Master Protein Accessions	# Missed Cleavages	Theo. MH+ [Da]	Confidence (by Search Engine): Sequest HT	Percolator q-Value (by Search Engine): Sequest HT	Percolator PEP (by Search Engine): Sequest HT	XCorr (by Search Engine): Sequest HT
	High	SLEQIVNEYSTFSENK		8.05208e-07	0	1	1	2	YOR375C	0	1887.9	High	0	4.689e-05	4.28
	High	FIAEGSNMGSTPEAIAVFETAR	1xOxidation [M8]	2.87956e-05	0	1	1	1	YOR375C	0	2314.1	High	0	0.0002679	4.55
	High	AANLGGVAVSGLEMAQNSQR	1xOxidation [M14]	2.39548e-06	0	1	1	1	YOR375C	0	1988.98	High	0	8.067e-05	4.35
	High	VIELGGTVVSLSDSK		7.71623e-05	0	1	1	1	YOR375C	0	1503.83	High	0	0.0004159	2.89
	High	NSLTGLDMGGGK	1xOxidation [M8]	0.00846015	0.00106559	1	1	1	YOR375C	0	1165.55	High	0.00103	0.002968	2.19
	High	GANIASFIK		0.00423839	0.00106559	1	1	1	YOR375C	0	920.52	High	0.0009108	0.001867	2.6
	High	EIGYLFGAYR		0.00772991	0.00106559	1	2	1	YOR375C	0	1188.6	High	0.00103	0.00277	2.82
	High	VLPIVSVPER		0.00307045	0.00106559	1	2	1	YOR375C	0	1108.67	High	0.0009108	0.001583	2.37
	High	ALVAQGVK		0.00450057	0.00106559	1	1	1	YOR375C	0	785.488	High	0.0009108	0.001935	2.59
	High	VTISGSGNVAQYAALK		0.00522954	0.00106559	1	2	1	YOR375C	0	1578.85	High	0.0009108	0.002113	2.61
	High	STATGPSEAVWYGPPK		0.00197405	0.00106559	1	1	1	YOR375C	0	1647.8	High	0.0008405	0.001306	2.3
	High	HIGQDTDVPAGDIGVGGR		0.00858842	0.00106559	1	1	2	YOR375C	0	1763.87	High	0.00103	0.003007	3.15
	High	IMINCFNECIDYAK	2xCarbamidomethyl [C5; C9]; 1xOxidation [M2]	0.0046377	0.00106559	1	1	1	YOR375C	0	1806.79	High	0.0009108	0.001962	2.48
	High	GGLCVDLK	1xCarbamidomethyl [C4]	0.0186523	0.00210976	1	2	1	YOR375C	0	861.45	High	0.001767	0.006259	1.99
	High	FLGFEQIFK		0.0389219	0.00354048	1	2	1	YOR375C	0	1128.61	High	0.00279	0.01487	1.62
	High	VLPSLVK		0.082608	0.00881137	1	1	1	YOR375C	0	755.503	High	0.006955	0.04026	1.58
High	Master Protein	YOR270C	VPH1 SGDID:S000005796, Chr XV from 830574-828052, Genome Release 64-2-1, reverse complement, Verified ORF, "Subunit a of vacuolar-ATPase V0 domain; one of two isoforms (Vph1p and Stv1p); Vph1p is located in V-ATPase complexes of the vacuole while Stv1p is located in V-ATPase complexes of the Golgi and endosomes; relative distribution to the vacuolar membrane decreases upon DNA replication stress"	0	49.673	21	17	20	17	1	840	95.5	5.48	44.4	17
	Confidence	Sequence	Modifications	Qvality PEP	Qvality q-value	# Protein Groups	# Proteins	# PSMs	Master Protein Accessions	# Missed Cleavages	Theo. MH+ [Da]	Confidence (by Search Engine): Sequest HT	Percolator q-Value (by Search Engine): Sequest HT	Percolator PEP (by Search Engine): Sequest HT	XCorr (by Search Engine): Sequest HT
	High	LGIDVPSIIQVLDTNHTPPTFHR		5.51404e-05	0	1	1	2	YOR270C	0	2570.37	High	0.0004637	0.001008	2.83
	High	TTSTTLESELYAIAK		0.0011266	0.000649755	1	1	1	YOR270C	0	1627.84	High	0.0004637	0.001047	3.53
	High	ELDSWFQDVTR		0.000769601	0.000649755	1	1	1	YOR270C	0	1395.65	High	0.0004637	0.00092	2.44
	High	LYEGDTDK		0.0115189	0.00106559	1	1	1	YOR270C	0	940.426	High	0.00103	0.003877	1.38
	High	NAFIVFSHGDLIIK		0.00208022	0.00106559	1	1	2	YOR270C	0	1573.87	High	0.0009108	0.001487	2.99
	High	TVEIEQPVYDVK		0.0106834	0.00106559	1	1	1	YOR270C	0	1419.74	High	0.00103	0.003617	2.66
	High	DELATLQAR		0.00481504	0.00106559	1	1	1	YOR270C	0	1016.54	High	0.0009108	0.002013	2.6
	High	ILIAEGWIPR		0.00338461	0.00106559	1	1	1	YOR270C	0	1167.69	High	0.0009108	0.001657	2.8
	High	LIQMEDATDQIEVQK		0.00711623	0.00106559	1	1	1	YOR270C	0	1760.87	High	0.00103	0.002601	2.25
	High	LIQMEDATDQIEVQK	1xOxidation [M4]	0.00278555	0.00106559	1	1	1	YOR270C	0	1776.87	High	0.0009108	0.001515	2.95
	High	DKVATLEQILWR		0.014439	0.00132229	1	1	1	YOR270C	1	1471.83	High	0.001205	0.00481	2.67
	High	LGEMIAR	1xOxidation [M4]	0.0172995	0.00210976	1	1	1	YOR270C	0	805.424	High	0.001767	0.005792	1.97
	High	TFVNEIR		0.0273713	0.00216078	1	1	1	YOR270C	0	878.473	High	0.001783	0.009681	1.86
	High	VATLEQILWR		0.0232005	0.00216078	1	1	1	YOR270C	0	1228.7	High	0.001783	0.008019	1.76
	High	NDLEQYR		0.0337665	0.00314891	1	1	1	YOR270C	0	937.437	High	0.002508	0.01257	1.77
	High	NASYLEER		0.0386323	0.00354048	1	1	1	YOR270C	0	981.464	High	0.00279	0.01476	1.9
	High	AIFEILNK		0.0438547	0.0050128	1	1	1	YOR270C	0	947.556	High	0.003872	0.01733	1.98
	High	NLSDLYTVLK		0.0564384	0.00621096	1	1	1	YOR270C	0	1165.65	High	0.00491	0.02392	1.49
High	Master Protein	YML056C	IMD4 SGDID:S000004520, Chr XIII from 163308-162194,164176-163717, Genome Release 64-2-1, reverse complement, Verified ORF, "Inosine monophosphate dehydrogenase; catalyzes the rate-limiting step in the de novo synthesis of GTP; member of a four-gene family in S. cerevisiae, constitutively expressed; IMD4 has a paralog, IMD3, that arose from the whole genome duplication"	0	49.412	33	13	19	5	1	524	56.4	8.16	52.06	13
	Confidence	Sequence	Modifications	Qvality PEP	Qvality q-value	# Protein Groups	# Proteins	# PSMs	Master Protein Accessions	# Missed Cleavages	Theo. MH+ [Da]	Confidence (by Search Engine): Sequest HT	Percolator q-Value (by Search Engine): Sequest HT	Percolator PEP (by Search Engine): Sequest HT	XCorr (by Search Engine): Sequest HT
	High	QLLCGAAIGTIEADKER	1xCarbamidomethyl [C4]	4.85667e-05	0	1	1	1	YML056C	1	1844.95	High	0	0.0003401	4.54
	High	FGFSGFPVTEDGK		1.69461e-05	0	2	2	1	YLR432W; YML056C	0	1387.65	High	0	0.0002087	3.66
	High	ETFPDLEIIAGNVATR		9.65374e-05	0	2	2	2	YLR432W; YML056C	0	1745.91	High	0	0.0004575	3.23
	High	EQAANLIAAGADGLR		6.49854e-05	0	3	4	2	YLR432W; YML056C; YHR216W	0	1469.77	High	0	0.0003869	4.42
	High	YFSESDSVLVAQGVSGAVVDK		1.07742e-06	0	3	4	1	YLR432W; YML056C; YHR216W	0	2157.07	High	0	5.422e-05	5.24
	High	TASAQLEGGVHNLHSYEK		3.25355e-06	0	3	3	2	YLR432W; YML056C; YHR216W	0	1940.95	High	0	9.353e-05	4.09
	High	NQNYPLASK		0.00127926	0.000649755	3	3	2	YLR432W; YML056C; YHR216W	0	1034.53	High	0.0004637	0.001098	2.37
	High	LLIVDDNGNLVSMLSR	1xOxidation [M13]	0.000575118	0.000649755	2	2	2	YLR432W; YML056C	0	1774.94	High	0.0004637	0.0008392	3.15
	High	DGLSVQELMDSTTR	1xOxidation [M9]	0.00172533	0.000649755	1	1	1	YML056C	0	1567.73	High	0.0004637	0.001234	1.99
	High	GMGSIDAMQK	2xOxidation [M2; M8]	0.00282759	0.00106559	3	4	1	YLR432W; YML056C; YHR216W	0	1069.47	High	0.0009108	0.001522	1.95
	High	ENVQNGEVR		0.00387359	0.00106559	1	1	1	YML056C	0	1044.51	High	0.0009108	0.001775	2.21
	High	LLIVDDNGNLVSMLSR		0.014439	0.00132229	2	2	1	YLR432W; YML056C	0	1758.94	High	0.001205	0.004828	1.73
	High	LVGLVTSR		0.0295047	0.00216078	1	1	1	YML056C	0	844.525	High	0.001783	0.01065	2.08
	High	NPVTGIK		0.0564384	0.00621096	1	1	1	YML056C	0	728.43	High	0.00491	0.02391	1.39
High	Master Protein	YER178W	PDA1 SGDID:S000000980, Chr V from 546817-548079, Genome Release 64-2-1, Verified ORF, "E1 alpha subunit of the pyruvate dehydrogenase (PDH) complex; catalyzes the direct oxidative decarboxylation of pyruvate to acetyl-CoA; phosphorylated; regulated by glucose; PDH complex is concentrated in spots within the mitochondrial matrix, often near the ERMES complex and near peroxisomes"	0	48.353	45	17	20	17	1	420	46.3	8.1	45.17	17
	Confidence	Sequence	Modifications	Qvality PEP	Qvality q-value	# Protein Groups	# Proteins	# PSMs	Master Protein Accessions	# Missed Cleavages	Theo. MH+ [Da]	Confidence (by Search Engine): Sequest HT	Percolator q-Value (by Search Engine): Sequest HT	Percolator PEP (by Search Engine): Sequest HT	XCorr (by Search Engine): Sequest HT
	High	LSILFEDVYVK		0.000101718	0	1	1	1	YER178W	0	1325.74	High	0	0.0004668	2.85
	High	KYVDEQVELADAAPPPEAK		3.96987e-05	0	1	1	1	YER178W	1	2070.04	High	0	0.0003105	4.85
	High	GFCHLSVGQEAIAVGIENAITK	1xCarbamidomethyl [C3]	0.00028505	0.000649755	1	1	1	YER178W	0	2314.19	High	0.0004637	0.0006786	4.18
	High	YGGHSMSDPGTTYR	1xOxidation [M6]	0.000610527	0.000649755	1	1	1	YER178W	0	1544.64	High	0.0004637	0.0008548	2.42
	High	MHLIDLGIATEAEVK		0.00370318	0.00106559	1	1	1	YER178W	0	1639.87	High	0.0009108	0.001736	2.14
	High	VNGMDILAVYQASK	1xOxidation [M4]	0.00280649	0.00106559	1	1	1	YER178W	0	1524.77	High	0.0009108	0.001519	2.47
	High	YGMGTAASR	1xOxidation [M3]	0.00351386	0.00106559	1	1	1	YER178W	0	929.415	High	0.0009108	0.00169	1.75
	High	SSAMTEYFK	1xOxidation [M4]	0.00690542	0.00106559	1	1	1	YER178W	0	1079.47	High	0.00103	0.002551	2.68
	High	SSAMTEYFK		0.00193024	0.00106559	1	1	1	YER178W	0	1063.48	High	0.0008405	0.001292	1.98
	High	AVLAELMGR		0.00282759	0.00106559	1	1	1	YER178W	0	959.534	High	0.0009108	0.001522	2.3
	High	ATLLQMYK		0.00827134	0.00106559	1	1	1	YER178W	0	967.528	High	0.00103	0.002927	2.01
	High	ATLLQMYK	1xOxidation [M6]	0.0164113	0.00191257	1	1	1	YER178W	0	983.523	High	0.001627	0.005502	1.91
	High	GTETPTLR		0.0267615	0.00216078	1	1	1	YER178W	0	874.463	High	0.001783	0.009481	1.65
	High	LDSIITSYR		0.0271665	0.00216078	1	1	1	YER178W	0	1067.57	High	0.001783	0.009645	1.75
	High	AGVSYGK		0.0325253	0.00291415	1	1	1	YER178W	0	681.357	High	0.00233	0.01193	1.86
	High	DWCLSGK	1xCarbamidomethyl [C3]	0.0383448	0.00354048	1	1	1	YER178W	0	865.387	High	0.00279	0.0147	1.36
	High	YGGHSMSDPGTTYR	1xOxidation [M6]; 1xPhospho [S5(85.3)]	0.0398035	0.00398433	1	1	1	YER178W	0	1624.61	High	0.003118	0.01535	2.4
	High	GPLVLEYETYR		0.0653979	0.00687016	1	1	1	YER178W	0	1339.69	High	0.0054	0.02906	2.43
	High	IPEDTWDFK		0.0888071	0.00951819	1	1	1	YER178W	0	1150.54	High	0.007328	0.04455	1.75
	High	QGFASR		0.0907499	0.00964334	1	1	1	YER178W	0	665.337	High	0.007424	0.046	1.79
High	Master Protein	YHR065C	RRP3 SGDID:S000001107, Chr VIII from 229037-227532, Genome Release 64-2-1, reverse complement, Verified ORF, "Protein involved in rRNA processing; required for maturation of the 35S primary transcript of pre-rRNA and for cleavage leading to mature 18S rRNA; homologous to eIF-4a, which is a DEAD box RNA-dependent ATPase with helicase activity"	0	47.515	33	15	19	15	1	501	55.9	9.16	48.18	15
	Confidence	Sequence	Modifications	Qvality PEP	Qvality q-value	# Protein Groups	# Proteins	# PSMs	Master Protein Accessions	# Missed Cleavages	Theo. MH+ [Da]	Confidence (by Search Engine): Sequest HT	Percolator q-Value (by Search Engine): Sequest HT	Percolator PEP (by Search Engine): Sequest HT	XCorr (by Search Engine): Sequest HT
	High	KPHIIIATPGR		0.000221138	0	1	1	1	YHR065C	0	1202.74	High	0	0.000625	4.4
	High	YQTVDTLVQTLMVVPGGLK	1xOxidation [M12]	0.000688025	0.000649755	1	1	1	YHR065C	0	2078.12	High	0.0004637	0.0008865	2.81
	High	LLDMEFGPVLDR	1xOxidation [M4]	0.000703616	0.000649755	1	1	1	YHR065C	0	1420.71	High	0.0004637	0.0008944	3.13
	High	TAAFAIPILNR		0.000575118	0.000649755	1	1	1	YHR065C	0	1186.69	High	0.0004637	0.0008389	2.81
	High	AIPPALEGHDIIGLAQTGSGK		0.000241868	0.000649755	1	1	2	YHR065C	0	2045.1	High	0.0004637	0.0006442	2.69
	High	LWHDQEPYYACILAPTR	1xCarbamidomethyl [C11]	0.0113468	0.00106559	1	1	1	YHR065C	0	2133.02	High	0.00103	0.003823	2.37
	High	TTYLFSATMTSK	1xOxidation [M9]	0.00839674	0.00106559	1	1	1	YHR065C	0	1366.66	High	0.00103	0.002951	2.14
	High	LLDMEFGPVLDR		0.00188739	0.00106559	1	1	1	YHR065C	0	1404.72	High	0.0008405	0.00128	2.23
	High	ETFDSLGSLMGVR	1xOxidation [M10]	0.00808676	0.00106559	1	1	1	YHR065C	0	1427.68	High	0.00103	0.002872	2.24
	High	FLVMDEADR		0.00711623	0.00106559	1	1	1	YHR065C	0	1095.51	High	0.00103	0.002604	2.04
	High	FLVMDEADR	1xOxidation [M4]	0.00417528	0.00106559	1	1	1	YHR065C	0	1111.51	High	0.0009108	0.001851	2.14
	High	IEEVLGK		0.00695752	0.00106559	1	1	1	YHR065C	0	787.456	High	0.00103	0.002563	1.96
	High	KANDELTSLAEK		0.00778827	0.00106559	1	1	1	YHR065C	1	1318.68	High	0.00103	0.002781	3.47
	High	ASLTNPVK		0.0136975	0.00132229	1	1	1	YHR065C	0	829.478	High	0.001205	0.004559	2.01
	High	MGSLDLFK	1xOxidation [M1]	0.0142232	0.00132229	1	1	1	YHR065C	0	926.465	High	0.001205	0.004741	2.19
	High	ETFDSLGSLMGVR		0.0151065	0.00162885	1	1	1	YHR065C	0	1411.69	High	0.001424	0.00505	2.36
	High	ELAQQIK		0.0159243	0.00191257	1	1	1	YHR065C	0	829.478	High	0.001627	0.005302	2.41
	High	ANDELTSLAEK		0.0366633	0.00354048	1	1	1	YHR065C	0	1190.59	High	0.00279	0.01383	2.41
High	Master Protein	YHR007C	ERG11 SGDID:S000001049, Chr VIII from 121683-120091, Genome Release 64-2-1, reverse complement, Verified ORF, "Lanosterol 14-alpha-demethylase; catalyzes the C-14 demethylation of lanosterol to form 4,4''-dimethyl cholesta-8,14,24-triene-3-beta-ol in the ergosterol biosynthesis pathway; member of the cytochrome P450 family; associated and coordinately regulated with the P450 reductase Ncp1p"	0	47.442	44	16	20	16	1	530	60.7	8.66	47.99	16
	Confidence	Sequence	Modifications	Qvality PEP	Qvality q-value	# Protein Groups	# Proteins	# PSMs	Master Protein Accessions	# Missed Cleavages	Theo. MH+ [Da]	Confidence (by Search Engine): Sequest HT	Percolator q-Value (by Search Engine): Sequest HT	Percolator PEP (by Search Engine): Sequest HT	XCorr (by Search Engine): Sequest HT
	High	DMHVPNTSYVIPAGYHVLVSPGYTHLR	1xOxidation [M2]	7.4727e-07	0	1	1	1	YHR007C	0	3039.51	High	0	4.519e-05	3.78
	High	LADVSAEAAYAHLTTPVFGK		7.67906e-06	0	1	1	1	YHR007C	0	2061.07	High	0	0.0001424	4.77
	High	TTGTIDVMVTQPEMTIFTASR	2xOxidation [M8; M14]	0.000107176	0	1	1	1	YHR007C	0	2331.12	High	0	0.0004763	3.61
	High	DEYFPNAHQFNIHR		0.000208315	0	1	1	2	YHR007C	0	1787.82	High	0	0.0006132	3.15
	High	ELTYDLLQEMPLLNQTIK	1xOxidation [M10]	0.000848095	0.000649755	1	1	1	YHR007C	0	2178.14	High	0.0004637	0.0009507	3.02
	High	TVPPPDFTSMVTLPTGPAK	1xOxidation [M10]	0.00499919	0.00106559	1	1	2	YHR007C	0	1972.01	High	0.0009108	0.002058	2.13
	High	AISGTYMSLIK	1xOxidation [M7]	0.00488787	0.00106559	1	1	1	YHR007C	0	1199.63	High	0.0009108	0.002025	2.35
	High	SYVPLIAEEVYK		0.00185936	0.00106559	1	1	1	YHR007C	0	1410.75	High	0.0008405	0.001271	2.42
	High	GHEFVFNAK		0.00295757	0.00106559	1	1	1	YHR007C	0	1048.52	High	0.0009108	0.001552	2.85
	High	YGDIFSFVLLGR		0.0136975	0.00132229	1	1	2	YHR007C	0	1386.74	High	0.001783	0.00761	1.67
	High	AKLDTDFAYLYSDLDK		0.0202623	0.00210976	1	1	1	YHR007C	1	1877.92	High	0.001767	0.006854	3.41
	High	GVIYDCPNSR	1xCarbamidomethyl [C6]	0.0299507	0.00216078	1	1	1	YHR007C	0	1180.54	High	0.001783	0.01086	1.68
	High	DLIDSLMK	1xOxidation [M7]	0.0313291	0.00239809	1	1	1	YHR007C	0	950.486	High	0.001955	0.01144	2.31
	High	DLIDSLMK		0.036119	0.00335822	1	1	1	YHR007C	0	934.491	High	0.002654	0.01367	1.47
	High	WHYPEGK		0.0577028	0.0063287	1	1	1	YHR007C	0	916.431	High	0.004998	0.02464	1.83
	High	GVSSPYLPFGGGR		0.0612092	0.00669503	1	1	1	YHR007C	0	1293.66	High	0.005278	0.02663	3.01
	High	GFTPINFVFPNLPLEHYR		0.0708893	0.00781134	1	1	1	YHR007C	0	2161.12	High	0.006245	0.03261	1.59
High	Master Protein	YER025W	GCD11 SGDID:S000000827, Chr V from 205251-206834, Genome Release 64-2-1, Verified ORF, "Gamma subunit of the translation initiation factor eIF2; involved in the identification of the start codon; binds GTP when forming the ternary complex with GTP and tRNAi-Met; mutations in human ortholog cause X-linked intellectual disability (XLID)"	0	47.426	39	18	20	18	1	527	57.8	6.8	39.26	18
	Confidence	Sequence	Modifications	Qvality PEP	Qvality q-value	# Protein Groups	# Proteins	# PSMs	Master Protein Accessions	# Missed Cleavages	Theo. MH+ [Da]	Confidence (by Search Engine): Sequest HT	Percolator q-Value (by Search Engine): Sequest HT	Percolator PEP (by Search Engine): Sequest HT	XCorr (by Search Engine): Sequest HT
	High	QATINIGTIGHVAHGK		4.53099e-07	0	1	1	1	YER025W	0	1616.89	High	0	3.528e-05	4.92
	High	LGDEIEIRPGIVTK		0.000165268	0	1	1	1	YER025W	0	1539.87	High	0	0.0005634	3.92
	High	LNPLSAEIINR		0.000601475	0.000649755	1	1	1	YER025W	0	1239.71	High	0.0004637	0.0008501	2.85
	High	LVGQVVGAK		0.00408237	0.00106559	1	1	1	YER025W	0	870.541	High	0.0009108	0.00183	2.36
	High	EESALEHQK		0.00446693	0.00106559	1	1	2	YER025W	0	1070.51	High	0.001955	0.0111	2.37
	High	CQEPTCPEPDCYR	3xCarbamidomethyl [C1; C6; C11]	0.00905294	0.00106559	1	1	1	YER025W	0	1711.65	High	0.00103	0.003148	1.7
	High	GGVAGGSILNGVFK		0.00284884	0.00106559	1	1	1	YER025W	0	1275.71	High	0.0009108	0.001528	2.18
	High	KLEPNEVLMVNIGSTATGAR	1xOxidation [M9]	0.00258456	0.00106559	1	1	1	YER025W	1	2116.11	High	0.0009108	0.001463	3.63
	High	FAVPGGLIGVGTK		0.00414408	0.00106559	1	1	1	YER025W	0	1215.71	High	0.0009108	0.001844	2.37
	High	DFMISPR		0.0158048	0.00162885	1	1	1	YER025W	0	865.424	High	0.001627	0.005266	1.49
	High	AISGVQTVR		0.0208815	0.00210976	1	1	1	YER025W	0	930.537	High	0.001767	0.007096	2.25
	High	DFMISPR	1xOxidation [M3]	0.0265613	0.00216078	1	1	1	YER025W	0	881.419	High	0.001783	0.009338	1.5
	High	HVIILQNK		0.0267615	0.00216078	1	1	1	YER025W	0	964.594	High	0.001783	0.009415	2.27
	High	GTIADGAPIVPISAQLK		0.0383448	0.00354048	1	1	1	YER025W	0	1650.94	High	0.00279	0.01462	1.45
	High	SFDVNKPGAEIEDLK		0.0401017	0.00398433	1	1	1	YER025W	0	1661.84	High	0.003118	0.01552	2.35
	High	VAFTGLEEDGETEEEKR		0.0428855	0.00466421	1	1	1	YER025W	1	1938.89	High	0.003615	0.01679	2.3
	High	VAFTGLEEDGETEEEK		0.0603139	0.00653869	1	1	1	YER025W	0	1782.79	High	0.005153	0.02609	1.25
	High	LIGWATIK		0.0746089	0.00834875	1	1	1	YER025W	0	901.551	High	0.006477	0.0348	1.41
	High	VDPTLCR	1xCarbamidomethyl [C6]	0.0802438	0.00863652	1	1	1	YER025W	0	860.429	High	0.006684	0.03857	1.71
High	Master Protein	YGL008C	PMA1 SGDID:S000002976, Chr VII from 482666-479910, Genome Release 64-2-1, reverse complement, Verified ORF, "Plasma membrane P2-type H+-ATPase; pumps protons out of cell; major regulator of cytoplasmic pH and plasma membrane potential; long-lived protein asymmetrically distributed at plasma membrane between mother cells and buds; accumulates at high levels in mother cells during aging, buds emerg…	0	47.336	20	17	18	17	1	918	99.6	5.11	44.36	17
	Confidence	Sequence	Modifications	Qvality PEP	Qvality q-value	# Protein Groups	# Proteins	# PSMs	Master Protein Accessions	# Missed Cleavages	Theo. MH+ [Da]	Confidence (by Search Engine): Sequest HT	Percolator q-Value (by Search Engine): Sequest HT	Percolator PEP (by Search Engine): Sequest HT	XCorr (by Search Engine): Sequest HT
	High	GYLVAMTGDGVNDAPSLK	1xOxidation [M6]	1.01762e-07	0	1	2	1	YGL008C	0	1823.88	High	0	1.677e-05	4.19
	High	KADTGIAVEGATDAAR		5.85348e-05	0	1	2	1	YGL008C	1	1545.79	High	0	0.0003693	5.17
	High	VLEFHPFDPVSK		0.0011695	0.000649755	1	2	1	YGL008C	0	1414.74	High	0.0004637	0.001063	3.53
	High	YGLNQMADEK	1xOxidation [M6]	0.000533733	0.000649755	1	1	1	YGL008C	0	1184.53	High	0.0004637	0.0008202	2.52
	High	MLTGDAVGIAK	1xOxidation [M1]	0.00028293	0.000649755	1	2	1	YGL008C	0	1091.58	High	0.0004637	0.000677	2.44
	High	QLGLGTNIYNAER		0.000537734	0.000649755	1	2	1	YGL008C	0	1448.75	High	0.0004637	0.0008221	2.4
	High	RGEGFMVVTATGDNTFVGR	1xOxidation [M6]	0.0111772	0.00106559	1	1	1	YGL008C	1	2029.98	High	0.00103	0.003766	3.17
	High	VTAVVESPEGER		0.00254615	0.00106559	1	2	1	YGL008C	0	1272.64	High	0.0009108	0.001453	3.12
	High	SVEDFMAAMQR	1xOxidation [M6]	0.00522954	0.00106559	1	2	1	YGL008C	0	1300.57	High	0.0009108	0.002111	2.11
	High	TLANTAVVIR		0.00234486	0.00106559	1	1	1	YGL008C	0	1057.64	High	0.0008405	0.001401	2.51
	High	KVTAVVESPEGER		0.00341008	0.00106559	1	2	2	YGL008C	1	1400.74	High	0.0009108	0.001666	2.96
	High	TVEEDHPIPEDVHENYENK		0.022513	0.00216078	1	2	1	YGL008C	0	2294.02	High	0.001783	0.007728	2.5
	High	ADTGIAVEGATDAAR		0.0347929	0.00335822	1	2	1	YGL008C	0	1417.69	High	0.002654	0.01304	1.21
	High	GAPLFVLK		0.042251	0.00466421	1	2	1	YGL008C	0	844.529	High	0.003615	0.01659	1.78
	High	VVEILQNR		0.0425671	0.00466421	1	2	1	YGL008C	0	970.568	High	0.003615	0.01677	2.01
	High	VAELASR		0.0461998	0.0050128	1	2	1	YGL008C	0	745.42	High	0.003872	0.01858	1.83
	High	ESLVVK		0.0740665	0.00834875	1	1	1	YGL008C	0	674.408	High	0.006477	0.03462	1.46
High	Master Protein	YDR449C	UTP6 SGDID:S000002857, Chr IV from 1358902-1357580, Genome Release 64-2-1, reverse complement, Verified ORF, "Nucleolar protein; component of the small subunit (SSU) processome containing the U3 snoRNA that is involved in processing of pre-18S rRNA"	0	47.055	45	19	21	19	1	440	52.4	8.97	41.41	19
	Confidence	Sequence	Modifications	Qvality PEP	Qvality q-value	# Protein Groups	# Proteins	# PSMs	Master Protein Accessions	# Missed Cleavages	Theo. MH+ [Da]	Confidence (by Search Engine): Sequest HT	Percolator q-Value (by Search Engine): Sequest HT	Percolator PEP (by Search Engine): Sequest HT	XCorr (by Search Engine): Sequest HT
	High	TNSLSDWSIQQR		5.11728e-05	0	1	1	1	YDR449C	0	1434.7	High	0	0.0003483	2.62
	High	LDIDQLQLSVK		0.000456268	0.000649755	1	1	1	YDR449C	0	1271.72	High	0.0004637	0.0007817	2.43
	High	YINYESNVNK		0.000763874	0.000649755	1	1	1	YDR449C	0	1243.6	High	0.0004637	0.000918	2.19
	High	GDIALTIFDVCMK	1xCarbamidomethyl [C11]; 1xOxidation [M12]	0.00146356	0.000649755	1	1	1	YDR449C	0	1498.73	High	0.0004637	0.001156	2.05
	High	NEVSLIMK		0.00898506	0.00106559	1	1	1	YDR449C	0	933.507	High	0.00103	0.003128	1.95
	High	GYYAISDSK		0.00266315	0.00106559	1	1	1	YDR449C	0	1003.47	High	0.0009108	0.00148	2.55
	High	LHPTNVDIWISCAK	1xCarbamidomethyl [C12]	0.00990866	0.00106559	1	1	1	YDR449C	0	1653.84	High	0.00103	0.003387	2.73
	High	EQELDMQNEQK	1xOxidation [M6]	0.0042703	0.00106559	1	1	1	YDR449C	0	1407.61	High	0.0009108	0.001873	2.19
	High	MNIELNK		0.0153358	0.00162885	1	1	1	YDR449C	0	861.45	High	0.001424	0.005098	1.87
	High	SYLQDNYLK		0.0167862	0.00191257	1	1	1	YDR449C	0	1143.57	High	0.001627	0.005624	2.18
	High	NEVSLIMK	1xOxidation [M7]	0.0164113	0.00191257	1	1	1	YDR449C	0	949.502	High	0.001627	0.005485	2.43
	High	ILDLIISK		0.025775	0.00216078	1	1	1	YDR449C	0	914.592	High	0.001783	0.009009	1.56
	High	LNELPEADISVLGNAETNPALR		0.0265613	0.00216078	1	1	1	YDR449C	0	2336.21	High	0.001783	0.00939	2.18
	High	LFDEFLDLER		0.0277854	0.00216078	1	1	1	YDR449C	0	1296.65	High	0.001783	0.009861	1.87
	High	LWYEYVK		0.0345334	0.00335822	1	1	1	YDR449C	0	1000.51	High	0.002654	0.01289	1.44
	High	MNIELNK	1xOxidation [M1]	0.0445127	0.0050128	1	1	1	YDR449C	0	877.445	High	0.003872	0.01765	1.68
	High	IGFIYQR		0.05439	0.00576207	1	1	1	YDR449C	0	896.499	High	0.00459	0.02278	1.92
	High	FNPDVPK		0.0693496	0.0071867	1	1	1	YDR449C	0	816.425	High	0.005639	0.03147	1.8
	High	FELNFITK		0.0693496	0.0071867	1	1	1	YDR449C	0	1011.55	High	0.005639	0.03146	1.72
	High	SHLQVPSTGDSMKDK	1xOxidation [M12]	0.0735277	0.00834875	1	1	1	YDR449C	1	1645.79	High	0.006477	0.03434	2.29
	High	IHNIYNQLLK		0.0888071	0.00951819	1	1	1	YDR449C	0	1255.72	High	0.007424	0.04492	2.77
High	Master Protein	YER043C	SAH1 SGDID:S000000845, Chr V from 237119-235770, Genome Release 64-2-1, reverse complement, Verified ORF, "S-adenosyl-L-homocysteine hydrolase; catabolizes S-adenosyl-L-homocysteine which is formed after donation of the activated methyl group of S-adenosyl-L-methionine (AdoMet) to an acceptor; regulates cellular lipid homoeostasis by regulating phosphatidylcholine(PC)synthesis and triacylglycerol…	0	47.003	33	15	17	15	1	449	49.1	6.24	47.56	15
	Confidence	Sequence	Modifications	Qvality PEP	Qvality q-value	# Protein Groups	# Proteins	# PSMs	Master Protein Accessions	# Missed Cleavages	Theo. MH+ [Da]	Confidence (by Search Engine): Sequest HT	Percolator q-Value (by Search Engine): Sequest HT	Percolator PEP (by Search Engine): Sequest HT	XCorr (by Search Engine): Sequest HT
	High	ECINIKPQVDR	1xCarbamidomethyl [C2]	0.000154527	0	1	1	1	YER043C	0	1371.7	High	0	0.0005502	2.84
	High	LNLILDDGGDLTTLVHEK		4.71575e-08	0	1	1	1	YER043C	0	1966.05	High	0	1.144e-05	5.67
	High	KLNLILDDGGDLTTLVHEK		9.46483e-06	0	1	1	2	YER043C	1	2094.14	High	0	0.0003421	5.06
	High	VPAINVNDSVTK		1.3545e-05	0	1	1	1	YER043C	0	1256.68	High	0	0.0001875	3.63
	High	TGPFEVGVHVLPK		0.000238283	0.000649755	1	1	2	YER043C	0	1379.77	High	0.0004637	0.0006406	2.55
	High	VAVVAGYGDVGK		0.00136831	0.000649755	1	1	1	YER043C	0	1134.62	High	0.0004637	0.001126	2.56
	High	EIELAEHEMPGLMAIR	2xOxidation [M9; M13]	0.00220857	0.00106559	1	1	1	YER043C	0	1870.9	High	0.0008405	0.001368	2.82
	High	ATDVMLAGK	1xOxidation [M5]	0.0064054	0.00106559	1	1	1	YER043C	0	921.471	High	0.0009108	0.002419	2.32
	High	ESLVDGIK		0.0106033	0.00106559	1	1	1	YER043C	0	860.472	High	0.00103	0.003591	2.28
	High	LKVPAINVNDSVTK		0.0130923	0.00132229	1	1	1	YER043C	1	1497.86	High	0.001205	0.004366	3.2
	High	VQSEYLGIPEEGPFK		0.0202623	0.00210976	1	1	1	YER043C	0	1692.85	High	0.001767	0.006881	1.54
	High	FDNLYGCR	1xCarbamidomethyl [C7]	0.0178285	0.00210976	1	1	1	YER043C	0	1044.46	High	0.001767	0.005996	2.08
	High	ILDEAVAK		0.0284182	0.00216078	1	1	1	YER043C	0	858.493	High	0.001783	0.01011	1.87
	High	FHLGNLGVR		0.0531956	0.00576207	1	1	1	YER043C	0	1012.57	High	0.00459	0.02227	1.94
	High	HIEFQK		0.0581303	0.0063287	1	1	1	YER043C	0	801.425	High	0.004998	0.02494	2.02
High	Master Protein	YPR041W	TIF5 SGDID:S000006245, Chr XVI from 648704-649921, Genome Release 64-2-1, Verified ORF, "Translation initiation factor eIF5; functions both as a GTPase-activating protein to mediate hydrolysis of ribosome-bound GTP and as a GDP dissociation inhibitor to prevent recycling of eIF2"	0	45.941	51	17	22	17	1	405	45.2	5.06	45.56	17
	Confidence	Sequence	Modifications	Qvality PEP	Qvality q-value	# Protein Groups	# Proteins	# PSMs	Master Protein Accessions	# Missed Cleavages	Theo. MH+ [Da]	Confidence (by Search Engine): Sequest HT	Percolator q-Value (by Search Engine): Sequest HT	Percolator PEP (by Search Engine): Sequest HT	XCorr (by Search Engine): Sequest HT
	High	ILVQLYNNDIISEEEIMR	1xOxidation [M17]	0.000104022	0	1	1	1	YPR041W	0	2208.12	High	0	0.0004707	3.37
	High	AAELDVLNDPK		2.05773e-05	0	1	1	1	YPR041W	0	1184.62	High	0	0.0002287	4.14
	High	SQNAPSDGTGSSTPQHHDEDEDELSR		8.63079e-05	0	1	1	1	YPR041W	0	2796.16	High	0	0.0004355	3.56
	High	GGGLSISDIAQGK		0.000240069	0.000649755	1	1	1	YPR041W	0	1202.64	High	0.0004637	0.0006429	3.95
	High	NPPDSVSGSK		0.00176449	0.000649755	1	1	2	YPR041W	0	987.474	High	0.0004637	0.001245	2.08
	High	AAASTLEDIEVKDDEWAVDMSEEAIR	1xOxidation [M20]	0.00111821	0.000649755	1	1	1	YPR041W	1	2909.34	High	0.0004637	0.001044	2.41
	High	LQDVLDGFINK		0.00234486	0.00106559	1	1	2	YPR041W	0	1261.68	High	0.0008405	0.001403	3.09
	High	AATASANVR		0.00321164	0.00106559	1	1	1	YPR041W	0	860.458	High	0.0009108	0.001619	2.66
	High	TAVLNVADISHALNRPAPYIVK		0.00183174	0.00106559	1	1	1	YPR041W	0	2362.32	High	0.0008405	0.001265	3.27
	High	ILVTPEYEK		0.00198888	0.00106559	1	1	1	YPR041W	0	1091.6	High	0.0008405	0.001307	2.04
	High	FLGLEHK		0.00778827	0.00106559	1	1	1	YPR041W	0	843.472	High	0.00103	0.002791	1.81
	High	NFMGGIER	1xOxidation [M3]	0.0174303	0.00210976	1	1	1	YPR041W	0	939.435	High	0.001767	0.005816	1.65
	High	NPETEIIITK		0.0253906	0.00216078	1	1	1	YPR041W	0	1157.64	High	0.001783	0.008882	1.96
	High	LSSFILK		0.0286323	0.00216078	1	1	1	YPR041W	0	807.497	High	0.001783	0.01026	2.12
	High	FVLCGSCK	2xCarbamidomethyl [C4; C7]	0.0465447	0.0050128	1	1	1	YPR041W	0	970.448	High	0.003872	0.01875	1.3
	High	DNDLVR		0.0568568	0.0063287	1	1	2	YPR041W	0	731.368	High	0.004998	0.02432	1.68
	High	MPPIQAK	1xOxidation [M1]	0.0649193	0.00687016	1	1	2	YPR041W	0	800.433	High	0.006477	0.03428	1.61
	High	MPPIQAK		0.0820109	0.00881137	1	1	1	YPR041W	0	784.439	High	0.006819	0.0399	1.09
High	Master Protein	YAL005C	SSA1 SGDID:S000000004, Chr I from 141431-139503, Genome Release 64-2-1, reverse complement, Verified ORF, "ATPase involved in protein folding and NLS-directed nuclear transport; member of HSP70 family; forms chaperone complex with Ydj1p; localized to nucleus, cytoplasm, and cell wall; 98% identical with paralog Ssa2p, but subtle differences between the two proteins provide functional specificity …	0	45.918	34	18	18	2	1	642	69.6	5.11	47.79	18
	Confidence	Sequence	Modifications	Qvality PEP	Qvality q-value	# Protein Groups	# Proteins	# PSMs	Master Protein Accessions	# Missed Cleavages	Theo. MH+ [Da]	Confidence (by Search Engine): Sequest HT	Percolator q-Value (by Search Engine): Sequest HT	Percolator PEP (by Search Engine): Sequest HT	XCorr (by Search Engine): Sequest HT
	High	IINEPTAAAIAYGLDKK		4.89307e-05	0	3	4	1	YAL005C; YER103W; YLL024C	1	1787.99	High	0	0.0003411	4.43
	High	FEELCADLFR	1xCarbamidomethyl [C5]	0.000182116	0	3	4	1	YAL005C; YER103W; YLL024C	0	1299.6	High	0	0.0005846	2.76
	High	ATAGDTHLGGEDFDNR		0.000107176	0	2	3	1	YAL005C; YLL024C	0	1675.73	High	0	0.0004763	3.33
	High	LVNHFIQEFK		0.00139935	0.000649755	2	2	1	YAL005C; YLL024C	0	1274.69	High	0.0004637	0.001137	2.41
	High	LIDVDGKPQIQVEFK		0.000442841	0.000649755	2	2	1	YAL005C; YLL024C	0	1728.95	High	0.0004637	0.0007758	3.02
	High	DAGTIAGLNVLR		0.000601475	0.000649755	4	4	1	YAL005C; YJL034W; YER103W; YLL024C	0	1199.67	High	0.0004637	0.0008515	3.08
	High	FKEEDEKESQR		0.000648117	0.000649755	2	2	1	YAL005C; YLL024C	2	1424.67	High	0.0004637	0.0008713	3.43
	High	ELQDIANPIMSK	1xOxidation [M10]	0.000992182	0.000649755	1	1	1	YAL005C	0	1374.69	High	0.0004637	0.001001	2.81
	High	ARFEELCADLFR	1xCarbamidomethyl [C7]	0.001348	0.000649755	3	4	1	YAL005C; YER103W; YLL024C	1	1526.74	High	0.0004637	0.00112	3.48
	High	NSTIPTK		0.0109275	0.00106559	3	4	1	YAL005C; YER103W; YLL024C	0	760.42	High	0.00103	0.003691	2.14
	High	SINPDEAVAYGAAVQAAILTGDESSK		0.00727858	0.00106559	2	2	1	YAL005C; YLL024C	0	2577.27	High	0.00103	0.002644	3.31
	High	FELSGIPPAPR		0.00215953	0.00106559	3	4	1	YAL005C; YER103W; YLL024C	0	1183.65	High	0.0008405	0.001352	2.51
	High	LIGDAAK		0.0404021	0.00398433	6	7	1	YAL005C; YNL209W; YJL034W; YER103W; YLL024C; YDL229W	0	687.404	High	0.003118	0.01563	1.89
	High	STLDPVEK		0.0486667	0.00523344	2	2	1	YAL005C; YLL024C	0	888.467	High	0.004036	0.01977	2.15
	High	MKETAESYLGAK	1xOxidation [M1]	0.0512611	0.00540776	2	2	1	YAL005C; YLL024C	1	1343.65	High	0.00416	0.02111	2.62
	High	NQLESIAYSLK		0.0581303	0.0063287	2	2	1	YAL005C; YLL024C	0	1265.67	High	0.004998	0.02486	1.43
	High	NTISEAGDKLEQADKDTVTK		0.0612092	0.00669503	1	1	1	YAL005C	2	2163.08	High	0.005278	0.02674	2.59
	High	TKDNNLLGK		0.0673461	0.00705222	3	4	1	YAL005C; YER103W; YLL024C	1	1002.56	High	0.00553	0.03031	1.83
High	Master Protein	YPR163C	TIF3 SGDID:S000006367, Chr XVI from 869955-868645, Genome Release 64-2-1, reverse complement, Verified ORF, "Translation initiation factor eIF-4B; contains an RNA recognition motif and binds to single-stranded RNA; has RNA annealing activity; interacts with Rps20p at the head of the 40S ribosomal subunit and alters the structure of the mRNA entry channel"	0	45.036	46	19	19	19	1	436	48.5	5.29	39.62	19
	Confidence	Sequence	Modifications	Qvality PEP	Qvality q-value	# Protein Groups	# Proteins	# PSMs	Master Protein Accessions	# Missed Cleavages	Theo. MH+ [Da]	Confidence (by Search Engine): Sequest HT	Percolator q-Value (by Search Engine): Sequest HT	Percolator PEP (by Search Engine): Sequest HT	XCorr (by Search Engine): Sequest HT
	High	LDPALGGGSSDR		0.000367432	0.000649755	1	1	1	YPR163C	0	1144.56	High	0.0004637	0.0007336	2.55
	High	GGGADVDWSSAR		0.00126028	0.000649755	1	1	1	YPR163C	0	1177.52	High	0.0004637	0.001092	3.02
	High	EREEVDIDWSAAR		0.00126028	0.000649755	1	1	1	YPR163C	1	1575.74	High	0.0004637	0.001092	3.05
	High	EEVDIDWTAAR		0.000948679	0.000649755	1	1	1	YPR163C	0	1304.61	High	0.0004637	0.0009869	2.59
	High	SGGFGGSFGGR		0.00430246	0.00106559	1	1	1	YPR163C	0	985.449	High	0.0009108	0.001881	2.43
	High	EKEEPALDWGAAR		0.00256528	0.00106559	1	1	1	YPR163C	1	1471.72	High	0.0009108	0.001458	3.17
	High	TVYVSVAAPR		0.00433486	0.00106559	1	1	1	YPR163C	0	1062.59	High	0.0009108	0.001893	2.75
	High	ADLVAVLK		0.010059	0.00106559	1	1	1	YPR163C	0	828.519	High	0.00103	0.003446	1.47
	High	GSNFQGDGR		0.00660089	0.00106559	1	1	1	YPR163C	0	937.412	High	0.0009108	0.002473	2.1
	High	REEYPVPDAPPYR		0.0118712	0.00132229	1	1	1	YPR163C	1	1588.78	High	0.001205	0.003982	2.46
	High	EREEVDIDWTAAR		0.0119609	0.00132229	1	1	1	YPR163C	1	1589.76	High	0.001205	0.004023	3.28
	High	SRLDPALGGGSSDR		0.0193677	0.00210976	1	1	1	YPR163C	1	1387.69	High	0.001767	0.006555	2.25
	High	VDAAVEK		0.0259694	0.00216078	1	1	1	YPR163C	0	731.393	High	0.001783	0.009094	1.85
	High	GNAFVTLK		0.0320415	0.00239809	1	1	1	YPR163C	0	849.483	High	0.001955	0.01173	1.87
	High	SVYDVLR		0.0389219	0.00354048	1	1	1	YPR163C	0	851.462	High	0.002962	0.01491	2.05
	High	EEVDIDWSAAR		0.0369384	0.00354048	1	1	1	YPR163C	0	1290.6	High	0.00279	0.01393	2.12
	High	GSNFQGSSRPPR		0.0407046	0.00398433	1	1	1	YPR163C	0	1289.63	High	0.003294	0.01581	1.89
	High	EEPDIDWSAAR		0.0458575	0.0050128	1	1	1	YPR163C	0	1288.58	High	0.003872	0.01837	2.09
	High	TEDDDEDEEAEKQNGDAK		0.0757051	0.00834875	1	1	1	YPR163C	1	2037.8	High	0.006477	0.03565	1.83
High	Master Protein	YOR272W	YTM1 SGDID:S000005798, Chr XV from 832813-834195, Genome Release 64-2-1, Verified ORF, "Constituent of 66S pre-ribosomal particles; forms a complex with Nop7p and Erb1p that is required for maturation of the large ribosomal subunit; has seven C-terminal WD repeats"	0	44.718	44	16	18	16	1	460	51.3	6.96	42.54	16
	Confidence	Sequence	Modifications	Qvality PEP	Qvality q-value	# Protein Groups	# Proteins	# PSMs	Master Protein Accessions	# Missed Cleavages	Theo. MH+ [Da]	Confidence (by Search Engine): Sequest HT	Percolator q-Value (by Search Engine): Sequest HT	Percolator PEP (by Search Engine): Sequest HT	XCorr (by Search Engine): Sequest HT
	High	GLSSEASLNVEYTR		1.2698e-06	0	1	1	1	YOR272W	0	1525.75	High	0	5.881e-05	4.36
	High	QYSGHSGPIR		0.000798891	0.000649755	1	1	1	YOR272W	0	1101.54	High	0.0004637	0.0009301	2.84
	High	TSLHDYLTK		0.000873823	0.000649755	1	1	2	YOR272W	0	1077.56	High	0.0004637	0.0009601	3.01
	High	LTSQQQAQEDDDDEVNIEDGK		0.000873823	0.000649755	1	1	1	YOR272W	0	2377.03	High	0.0004637	0.0009599	3.16
	High	TWDLSGNVQK		0.000714207	0.000649755	1	1	1	YOR272W	0	1147.57	High	0.0004637	0.0008988	3.22
	High	EKDELLHVQDTPMYAPISLK	1xOxidation [M13]	0.00488787	0.00106559	1	1	1	YOR272W	1	2343.19	High	0.0009108	0.002026	2.89
	High	VTQQQLIGHK		0.010059	0.00106559	1	1	1	YOR272W	0	1151.65	High	0.00103	0.003441	2.81
	High	TLAILEGHK		0.00598655	0.00106559	1	1	1	YOR272W	0	981.573	High	0.0009108	0.002304	1.83
	High	HIISGSYDGIVR		0.00399155	0.00106559	1	1	2	YOR272W	0	1316.7	High	0.0009108	0.001804	3.21
	High	HITLHDPR		0.0105238	0.00106559	1	1	1	YOR272W	0	988.532	High	0.00103	0.003584	2.08
	High	APVVSIDVSDNSR		0.0139054	0.00132229	1	1	1	YOR272W	0	1358.69	High	0.001205	0.004633	2.58
	High	KGLSSEASLNVEYTR		0.0252005	0.00216078	1	1	1	YOR272W	1	1653.84	High	0.001783	0.008778	3.44
	High	EMTVVDPLEDINNPNNK	1xOxidation [M2]	0.0451802	0.0050128	1	1	1	YOR272W	0	1957.92	High	0.003872	0.01796	1.71
	High	APLSLLESHTAPVEQVIFDSTDNTVGYSVSQDHTIK		0.0594312	0.0063287	1	1	1	YOR272W	0	3898.93	High	0.004998	0.02581	1.73
	High	YISNTR		0.0714097	0.00801993	1	1	1	YOR272W	0	753.389	High	0.006391	0.03303	1.23
	High	LVSAGNDR		0.0808289	0.00863652	1	1	1	YOR272W	0	831.432	High	0.006684	0.0389	1.52
High	Master Protein	YLR328W	NMA1 SGDID:S000004320, Chr XII from 784913-786118, Genome Release 64-2-1, Verified ORF, "Nicotinic acid mononucleotide adenylyltransferase; catalyzes the transfer of the adenylyl moiety of ATP to nicotinamide mononucleotide to form NAD; involved in pathways of NAD biosynthesis, including the de novo, NAD(+) salvage, and nicotinamide riboside salvage pathways; homolog of human NMNAT; NMA1 has a pa…	0	44.706	42	13	17	9	1	401	45.8	6.9	42.58	13
	Confidence	Sequence	Modifications	Qvality PEP	Qvality q-value	# Protein Groups	# Proteins	# PSMs	Master Protein Accessions	# Missed Cleavages	Theo. MH+ [Da]	Confidence (by Search Engine): Sequest HT	Percolator q-Value (by Search Engine): Sequest HT	Percolator PEP (by Search Engine): Sequest HT	XCorr (by Search Engine): Sequest HT
	High	SFLLSHDIMYEHR	1xOxidation [M9]	2.79482e-05	0	2	2	1	YGR010W; YLR328W	0	1663.79	High	0	0.0002644	3.33
	High	SFLLSHDIMYEHR		6.54725e-05	0	2	2	1	YGR010W; YLR328W	0	1647.79	High	0	0.0003875	3.29
	High	FEVIGGYYSPVSDNYQK		2.25064e-05	0	1	1	1	YLR328W	0	1965.92	High	0	0.000239	2.71
	High	TLEDYEFPSHR		8.31449e-05	0	1	1	1	YLR328W	0	1393.64	High	0	0.0004287	2.93
	High	YQIADLEEVPHGIVR		0.000714207	0.000649755	1	1	2	YLR328W	0	1738.91	High	0.0004637	0.000897	2.95
	High	QLIYNDISSTK		0.000364699	0.000649755	2	2	1	YGR010W; YLR328W	0	1281.67	High	0.0004637	0.0007308	2.31
	High	AMSVQYLLPNSVIR	1xOxidation [M2]	0.000264541	0.000649755	1	1	1	YLR328W	0	1606.86	High	0.0004637	0.0006632	3.38
	High	MFEMALDAISEQTR	2xOxidation [M1; M4]	0.00248959	0.00106559	1	1	2	YLR328W	0	1673.75	High	0.005639	0.0304	2.52
	High	MCELACER	2xCarbamidomethyl [C2; C6]; 1xOxidation [M1]	0.00990866	0.00106559	2	2	1	YGR010W; YLR328W	0	1084.42	High	0.00103	0.003394	1.73
	High	YGSDSTTESETR		0.00245259	0.00106559	1	1	1	YLR328W	0	1332.55	High	0.0009108	0.00143	1.68
	High	APDFKPPSADEELIPPPDPESK		0.00291359	0.00106559	1	1	1	YLR328W	0	2376.16	High	0.0009108	0.001542	2.88
	High	YGSDSTTESETR	1xPhospho [S/T]	0.0240893	0.00216078	1	1	1	YLR328W	0	1412.52	High	0.001783	0.008323	1.96
	High	VLDHFNHEINIK		0.0386323	0.00354048	2	2	1	YGR010W; YLR328W	0	1478.78	High	0.00279	0.01485	2.31
	High	GGVATVTGEK		0.05439	0.00576207	1	1	1	YLR328W	0	918.489	High	0.00459	0.02276	2.22
	High	LYVDQTEPVK		0.0594312	0.0063287	1	1	1	YLR328W	0	1191.63	High	0.004998	0.02568	2.04
High	Master Protein	IPI00061200 IPI:IPI00061200.1	TREMBL:Q96DU2 REFSEQ_NP:NP_258259|ENSEMBL:ENSP00000267119 Tax_Id=9606 Keratin 6 irs	0	44.534	27	15	22	5	1	523	57.3	6.61	51.87	15
	Confidence	Sequence	Modifications	Qvality PEP	Qvality q-value	# Protein Groups	# Proteins	# PSMs	Master Protein Accessions	# Missed Cleavages	Theo. MH+ [Da]	Confidence (by Search Engine): Sequest HT	Percolator q-Value (by Search Engine): Sequest HT	Percolator PEP (by Search Engine): Sequest HT	XCorr (by Search Engine): Sequest HT
	High	FLEQQNQVLETK		2.0942e-06	0	3	5	3	IPI00174775 IPI:IPI00174775.1; IPI00061200 IPI:IPI00061200.1; IPI00103481 IPI:IPI00103481.1	0	1476.77	High	0	0.0001759	4.5
	High	LALDMEIATYR	1xOxidation [M5]	2.87956e-05	0	2	5	1	IPI00061200 IPI:IPI00061200.1; IPI00103481 IPI:IPI00103481.1	0	1311.66	High	0	0.0002682	3.68
	High	LALDMEIATYR		0.000326056	0.000649755	2	5	1	IPI00061200 IPI:IPI00061200.1; IPI00103481 IPI:IPI00103481.1	0	1295.67	High	0.0004637	0.0007066	3.09
	High	QASNLETAIADAEQR		0.000758188	0.000649755	1	1	3	IPI00061200 IPI:IPI00061200.1	0	1616.79	High	0.0004637	0.0009142	2.86
	High	DVDAAYANK		0.00127926	0.000649755	1	1	1	IPI00061200 IPI:IPI00061200.1	0	966.453	High	0.0004637	0.0011	2.71
	High	NNLEPILEGYISNLR		0.00348762	0.00106559	2	2	1	IPI00174775 IPI:IPI00174775.1; IPI00061200 IPI:IPI00061200.1	0	1744.92	High	0.0009108	0.001682	2.36
	High	AEAEALYQTK		0.00200382	0.00106559	3	7	1	IPI00174775 IPI:IPI00174775.1; IPI00166205 IPI:IPI00166205.2; IPI00061200 IPI:IPI00061200.1	0	1123.56	High	0.0008405	0.001311	2.54
	High	FQELQLAAGR		0.00790631	0.00106559	2	2	1	IPI00174775 IPI:IPI00174775.1; IPI00061200 IPI:IPI00061200.1	0	1132.61	High	0.00103	0.002819	1.8
	High	RYEEEINKR		0.0126084	0.00132229	2	2	1	IPI00174775 IPI:IPI00174775.1; IPI00061200 IPI:IPI00061200.1	2	1236.63	High	0.001205	0.004213	3.06
	High	FASFIDK		0.0201104	0.00210976	8	22	3	IPI00174775 IPI:IPI00174775.1; IPI00300725 IPI:IPI00300725.6; IPI00299145 IPI:IPI00299145.8; sp; IPI00009867 IPI:IPI00009867.2; IPI00061200 IPI:IPI00061200.1; IPI00103481 IPI:IPI00103481.1; IPI00376379 IPI:IPI00376379.1	0	827.43	High	0.001783	0.00956	2.57
	High	QLETLSGDR		0.0246387	0.00216078	2	4	1	IPI00174775 IPI:IPI00174775.1; IPI00061200 IPI:IPI00061200.1	0	1018.52	High	0.001783	0.00859	2.04
	High	FASFIDKVR		0.0374948	0.00354048	8	21	1	IPI00174775 IPI:IPI00174775.1; IPI00300725 IPI:IPI00300725.6; IPI00299145 IPI:IPI00299145.8; sp; IPI00009867 IPI:IPI00009867.2; IPI00061200 IPI:IPI00061200.1; IPI00103481 IPI:IPI00103481.1; IPI00376379 IPI:IPI00376379.1	1	1082.6	High	0.00279	0.01425	2.39
	High	DVVEDYK		0.0490294	0.00523344	1	1	1	IPI00061200 IPI:IPI00061200.1	0	867.409	High	0.00416	0.01999	1.57
	High	VELQAK		0.0564384	0.00621096	5	12	1	IPI00174775 IPI:IPI00174775.1; IPI00300725 IPI:IPI00300725.6; IPI00299145 IPI:IPI00299145.8; IPI00061200 IPI:IPI00061200.1; IPI00103481 IPI:IPI00103481.1	0	687.404	High	0.00491	0.02396	1.55
	High	SEIENVK		0.0581303	0.0063287	1	1	1	IPI00061200 IPI:IPI00061200.1	0	818.425	High	0.004998	0.02484	1.62
	High	TAAENEFVLLK		0.0808289	0.00863652	1	1	1	IPI00061200 IPI:IPI00061200.1	0	1234.67	High	0.006684	0.03913	1.8
High	Master Protein	YKR039W	GAP1 SGDID:S000001747, Chr XI from 515063-516871, Genome Release 64-2-1, Verified ORF, "General amino acid permease; Gap1p senses the presence of amino acid substrates to regulate localization to the plasma membrane when needed; essential for invasive growth"	0	44.52	23	13	19	13	1	602	65.6	8.47	45.6	13
	Confidence	Sequence	Modifications	Qvality PEP	Qvality q-value	# Protein Groups	# Proteins	# PSMs	Master Protein Accessions	# Missed Cleavages	Theo. MH+ [Da]	Confidence (by Search Engine): Sequest HT	Percolator q-Value (by Search Engine): Sequest HT	Percolator PEP (by Search Engine): Sequest HT	XCorr (by Search Engine): Sequest HT
	High	EVDLDLLKQEIAEEK		1.733e-05	0	1	1	2	YKR039W	1	1771.93	High	0	0.0002107	4.51
	High	VKPIEVDPNLSEAEK		1.16659e-05	0	1	1	2	YKR039W	0	1667.89	High	0	0.0001746	4.56
	High	YWHDPGAFAGDTPGAK		0.000410979	0.000649755	1	1	1	YKR039W	0	1689.77	High	0.0004637	0.0007578	3.27
	High	FLPEIFSYVDRK		0.000588149	0.000649755	1	1	1	YKR039W	1	1513.8	High	0.0004637	0.0008455	2.67
	High	VAIITAQTPLK		0.00947111	0.00106559	1	1	1	YKR039W	0	1154.71	High	0.00103	0.003269	2.21
	High	SLIGASSVDAAASPFVIAIK		0.00470784	0.00106559	1	1	1	YKR039W	0	1917.07	High	0.0009108	0.001982	3.57
	High	TMVALAEQR	1xOxidation [M2]	0.00208022	0.00106559	1	1	1	YKR039W	0	1034.53	High	0.0008405	0.001332	2.75
	High	FLPEIFSYVDR		0.00716994	0.00106559	1	1	2	YKR039W	0	1385.71	High	0.004036	0.01991	1.78
	High	MDIDTGR		0.0148807	0.00132229	1	1	1	YKR039W	0	807.367	High	0.001205	0.004961	2.08
	High	TMVALAEQR		0.0154517	0.00162885	1	1	1	YKR039W	0	1018.53	High	0.001424	0.00515	1.75
	High	QEIAEEK		0.0182358	0.00210976	1	1	1	YKR039W	0	846.42	High	0.001767	0.006142	2.35
	High	GLDELSFK		0.0174303	0.00210976	1	1	1	YKR039W	0	908.472	High	0.001767	0.005852	1.86
	High	EVDLDLLK		0.017562	0.00210976	1	1	1	YKR039W	0	944.53	High	0.001767	0.005884	2.49
	High	MDIDTGR	1xOxidation [M1]	0.0432063	0.00489376	1	1	2	YKR039W	0	823.361	High	0.003787	0.01695	1.9
	High	NRHLQMIAIGGAIGTGLLVGSGTALR	1xOxidation [M6]	0.0455176	0.0050128	1	1	1	YKR039W	1	2592.44	High	0.003872	0.01825	2.84
High	Master Protein	YEL002C	WBP1 SGDID:S000000728, Chr V from 150014-148722, Genome Release 64-2-1, reverse complement, Verified ORF, "Beta subunit of the oligosaccharyl transferase glycoprotein complex; required for N-linked glycosylation of proteins in the endoplasmic reticulum"	0	43.903	46	16	19	16	1	430	49.4	5.9	48.7	16
	Confidence	Sequence	Modifications	Qvality PEP	Qvality q-value	# Protein Groups	# Proteins	# PSMs	Master Protein Accessions	# Missed Cleavages	Theo. MH+ [Da]	Confidence (by Search Engine): Sequest HT	Percolator q-Value (by Search Engine): Sequest HT	Percolator PEP (by Search Engine): Sequest HT	XCorr (by Search Engine): Sequest HT
	High	DYFSPSSEELVVSSNHLLNK		2.63275e-05	0	1	1	1	YEL002C	0	2265.1	High	0	0.0002567	3.19
	High	LFLNELGIYPSPK		0.000132099	0	1	1	1	YEL002C	0	1490.83	High	0	0.0005178	3.18
	High	SVHAVHSHADGTSYDEEPYK		0.000119879	0	1	1	1	YEL002C	0	2228.98	High	0	0.0004991	3.6
	High	KSEDFVFGESSAALLENR		0.000854455	0.000649755	1	1	1	YEL002C	1	1998.98	High	0.0004637	0.0009521	3.86
	High	LFDNIIVFPTK		0.000295894	0.000649755	1	1	1	YEL002C	0	1306.74	High	0.0004637	0.0006868	3.02
	High	IGLSFTTDKDVK		0.00050655	0.000649755	1	1	3	YEL002C	1	1323.72	High	0.0004637	0.0008074	2.91
	High	FFENEGNILCMSSPGAVPNTIR	1xCarbamidomethyl [C10]; 1xOxidation [M11]	0.000893631	0.000649755	1	1	1	YEL002C	0	2469.15	High	0.0004637	0.0009655	3.67
	High	NQDSNQEFAK		0.00321164	0.00106559	1	1	1	YEL002C	0	1180.52	High	0.0009108	0.001614	2.06
	High	HLANDEYPR		0.00229279	0.00106559	1	1	1	YEL002C	0	1114.53	High	0.0008405	0.001389	2.12
	High	HGVFTFLTDYRK		0.00621573	0.00106559	1	1	1	YEL002C	1	1483.77	High	0.0009108	0.002368	3.64
	High	HGVFTFLTDYR		0.00990866	0.00106559	1	1	1	YEL002C	0	1355.67	High	0.00103	0.003388	2.84
	High	TSFTESK		0.0193677	0.00210976	1	1	1	YEL002C	0	799.383	High	0.001767	0.006544	1.96
	High	EQIVPILNAPR		0.0322825	0.00239809	1	1	1	YEL002C	0	1249.73	High	0.002147	0.01186	1.87
	High	LVWIGSSDFLK		0.0353175	0.00335822	1	1	2	YEL002C	0	1264.69	High	0.002654	0.0132	1.97
	High	IGLSFTTDK		0.0493947	0.00540776	1	1	1	YEL002C	0	981.525	High	0.00416	0.02012	1.79
	High	TLVLYDQSTEPLEEYSVYLK		0.0688435	0.0071867	1	1	1	YEL002C	0	2390.2	High	0.005639	0.03116	2
High	Master Protein	YNL064C	YDJ1 SGDID:S000005008, Chr XIV from 507097-505868, Genome Release 64-2-1, reverse complement, Verified ORF, "Type I HSP40 co-chaperone; involved in regulation of HSP90 and HSP70 functions; critical for determining cell size at Start as a function of growth rate; involved in protein translocation across membranes; member of the DnaJ family"	0	43.811	35	13	16	13	1	409	44.6	6.3	42.98	13
	Confidence	Sequence	Modifications	Qvality PEP	Qvality q-value	# Protein Groups	# Proteins	# PSMs	Master Protein Accessions	# Missed Cleavages	Theo. MH+ [Da]	Confidence (by Search Engine): Sequest HT	Percolator q-Value (by Search Engine): Sequest HT	Percolator PEP (by Search Engine): Sequest HT	XCorr (by Search Engine): Sequest HT
	High	FPENHFTSEENLK		9.07396e-07	0	1	1	1	YNL064C	0	1591.74	High	0	4.971e-05	3.11
	High	FYDILGVPVTATDVEIKK		8.42105e-07	0	1	1	1	YNL064C	1	2008.1	High	0	4.798e-05	3.47
	High	VGIVPGEVIAPGMR	1xOxidation [M13]	0.000156852	0	1	1	1	YNL064C	0	1410.78	High	0	0.0005531	2.62
	High	YHPDKNPSEEAAEK		7.89104e-05	0	1	1	1	YNL064C	1	1614.74	High	0	0.0004199	2.42
	High	HEISASLEELYK		0.000491643	0.000649755	1	1	2	YNL064C	0	1418.72	High	0.0004637	0.001244	4.17
	High	DIKHEISASLEELYK		0.00171247	0.000649755	1	1	1	YNL064C	1	1774.92	High	0.0004637	0.001229	3.8
	High	QMGPMIQR	1xOxidation [M]	0.0105238	0.00106559	1	1	2	YNL064C	0	976.47	High	0.00103	0.003566	2.07
	High	EASAAYEILSDPEKR		0.00373105	0.00106559	1	1	1	YNL064C	1	1678.83	High	0.0009108	0.001742	3.63
	High	FYDILGVPVTATDVEIK		0.00519042	0.00106559	1	1	1	YNL064C	0	1880.01	High	0.0009108	0.002104	2.3
	High	ILEVHVEPGMK		0.00827134	0.00106559	1	1	1	YNL064C	0	1251.68	High	0.00103	0.002921	2.18
	High	FKEASAAYEILSDPEKR		0.00204931	0.00106559	1	1	1	YNL064C	2	1953.99	High	0.0008405	0.001325	4.16
	High	GEADQAPDVIPGDVVFIVSERPHK		0.00364807	0.00106559	1	1	1	YNL064C	0	2575.32	High	0.0009108	0.001719	2.49
	High	QMGPMIQR	2xOxidation [M2; M5]	0.0401017	0.00398433	1	1	1	YNL064C	0	992.465	High	0.003118	0.01553	1.6
	High	LEEILPPR		0.0428855	0.00466421	1	1	1	YNL064C	0	966.562	High	0.003615	0.01688	1.68
High	Master Protein	YHR052W	CIC1 SGDID:S000001094, Chr VIII from 210848-211978, Genome Release 64-2-1, Verified ORF, "Essential protein that interacts with proteasome components; has a potential role in proteasome substrate specificity; also copurifies with 66S pre-ribosomal particles"	0	43.464	42	16	18	16	1	376	42.5	8.78	39.38	16
	Confidence	Sequence	Modifications	Qvality PEP	Qvality q-value	# Protein Groups	# Proteins	# PSMs	Master Protein Accessions	# Missed Cleavages	Theo. MH+ [Da]	Confidence (by Search Engine): Sequest HT	Percolator q-Value (by Search Engine): Sequest HT	Percolator PEP (by Search Engine): Sequest HT	XCorr (by Search Engine): Sequest HT
	High	SSSELEKESSESEAVKK		0.000162819	0	1	1	2	YHR052W	2	1853.9	High	0	0.0005609	3.45
	High	VYMNQLPVK	1xOxidation [M3]	0.00103768	0.000649755	1	1	1	YHR052W	0	1107.59	High	0.0004637	0.001017	2.57
	High	NLLEDDEEELKK		0.000359293	0.000649755	1	1	1	YHR052W	1	1474.73	High	0.0004637	0.0007275	3.6
	High	AYNKVETTPISIR		0.000293693	0.000649755	1	1	1	YHR052W	1	1491.82	High	0.0004637	0.0006844	3.16
	High	DLQLIVVNNK		0.00168704	0.000649755	1	1	1	YHR052W	0	1155.67	High	0.0004637	0.001223	2.85
	High	EASATAVK		0.00820935	0.00106559	1	1	1	YHR052W	0	776.415	High	0.00103	0.002905	2.33
	High	EFSLTTLTNNIK		0.00256528	0.00106559	1	1	1	YHR052W	0	1380.74	High	0.0009108	0.001456	2.7
	High	VETTPISIR		0.00321164	0.00106559	1	1	1	YHR052W	0	1015.58	High	0.0009108	0.001615	2.3
	High	SPVLPLYYNQDVLDELEAK		0.00898506	0.00106559	1	1	1	YHR052W	0	2206.13	High	0.00103	0.003129	2.49
	High	GLMEIANPSELGSIFSK	1xOxidation [M3]	0.0064054	0.00106559	1	1	1	YHR052W	0	1808.91	High	0.0009108	0.002422	2.38
	High	VDEIICGK	1xCarbamidomethyl [C6]	0.0161659	0.00191257	1	1	1	YHR052W	0	933.471	High	0.001627	0.005381	1.68
	High	KSTPVSTPSK	1xPhospho [T3(98.9)]	0.0407046	0.00398433	1	1	1	YHR052W	1	1111.54	High	0.003294	0.01587	2.94
	High	STPVSTPSK		0.0448452	0.0050128	1	1	1	YHR052W	0	903.478	High	0.003872	0.0179	1.59
	High	SSTAIPR		0.0581303	0.0063287	1	1	1	YHR052W	0	731.405	High	0.004998	0.02484	1.53
	High	VYMNQLPVK		0.0639721	0.00669503	1	1	1	YHR052W	0	1091.59	High	0.0054	0.02832	1.85
	High	SSSELEKESSESEAVK		0.0673461	0.00705222	1	1	1	YHR052W	1	1725.8	High	0.00553	0.03025	2.55
	High	VSEDDLFDQLDSEGIK		0.082608	0.00881137	1	1	1	YHR052W	0	1809.84	High	0.006955	0.04027	1.35
High	Master Protein	YJL034W	KAR2 SGDID:S000003571, Chr X from 381327-383375, Genome Release 64-2-1, Verified ORF, "ATPase involved in protein import into the ER; also acts as a chaperone to mediate protein folding in the ER and may play a role in ER export of soluble proteins; regulates the unfolded protein response via interaction with Ire1p"	0	43.128	26	17	18	15	1	682	74.4	4.93	43.22	17
	Confidence	Sequence	Modifications	Qvality PEP	Qvality q-value	# Protein Groups	# Proteins	# PSMs	Master Protein Accessions	# Missed Cleavages	Theo. MH+ [Da]	Confidence (by Search Engine): Sequest HT	Percolator q-Value (by Search Engine): Sequest HT	Percolator PEP (by Search Engine): Sequest HT	XCorr (by Search Engine): Sequest HT
	High	SQIFSTAVDNQPTVMIK	1xOxidation [M15]	0.000537734	0.000649755	1	1	2	YJL034W	0	1894.96	High	0.007328	0.04323	2.89
	High	ITPSYVAFTDDER		0.000970186	0.000649755	1	1	1	YJL034W	0	1513.72	High	0.0004637	0.0009934	1.66
	High	TEILANEQGNR		0.000463133	0.000649755	1	1	1	YJL034W	0	1244.62	High	0.0004637	0.0007863	2.26
	High	DAGTIAGLNVLR		0.000601475	0.000649755	4	4	1	YAL005C; YJL034W; YER103W; YLL024C	0	1199.67	High	0.0004637	0.0008515	3.08
	High	AKFEELNLDLFK		0.00172533	0.000649755	1	1	1	YJL034W	1	1466.79	High	0.0004637	0.001236	2.33
	High	SESITITNDK		0.0106834	0.00106559	1	1	1	YJL034W	0	1107.55	High	0.00103	0.003627	2.16
	High	LTQEEIDR		0.00858842	0.00106559	1	1	1	YJL034W	0	1003.51	High	0.00103	0.00302	1.88
	High	VLQDSGLEK		0.00183174	0.00106559	1	1	1	YJL034W	0	988.531	High	0.0008405	0.001265	2.38
	High	VQQLLESYFDGKK		0.00470784	0.00106559	1	1	1	YJL034W	1	1554.82	High	0.0009108	0.001984	3.31
	High	VTHAVVTVPAYFNDAQR		0.00503686	0.00106559	1	1	1	YJL034W	0	1887.97	High	0.0009108	0.002067	3.25
	High	HGIDVSDNNK		0.00802616	0.00106559	1	1	1	YJL034W	0	1098.52	High	0.00103	0.00286	2.32
	High	DGKPAVEVSVK		0.0185124	0.00210976	1	1	1	YJL034W	0	1128.63	High	0.001767	0.006222	2.42
	High	LENYAHSLK		0.0220107	0.00216078	1	1	1	YJL034W	0	1074.56	High	0.001783	0.007523	2.63
	High	LIGDAAK		0.0404021	0.00398433	6	7	1	YAL005C; YNL209W; YJL034W; YER103W; YLL024C; YDL229W	0	687.404	High	0.003118	0.01563	1.89
	High	ALSSQMSTR	1xOxidation [M6]	0.0441825	0.0050128	1	1	1	YJL034W	0	996.478	High	0.003872	0.01747	1.84
	High	VQQLLESYFDGK		0.0683409	0.0071867	1	1	1	YJL034W	0	1426.72	High	0.005639	0.03089	1.84
	High	FELTGIPPAPR		0.0820109	0.00881137	1	1	1	YJL034W	0	1197.66	High	0.006819	0.03972	2.3
High	Master Protein	YDL185W	VMA1 SGDID:S000002344, Chr IV from 126787-130002, Genome Release 64-2-1, Verified ORF, "Subunit A of the V1 peripheral membrane domain of V-ATPase; protein precursor undergoes self-catalyzed splicing to yield the extein Tfp1p and the intein Vde (PI-SceI), which is a site-specific endonuclease; the V1 peripheral membrane domain of the vacuolar H+-ATPase (V-ATPase) has eight subunits; involved in m…	0	42.444	17	17	18	17	1	1071	118.6	6.16	31.72	17
	Confidence	Sequence	Modifications	Qvality PEP	Qvality q-value	# Protein Groups	# Proteins	# PSMs	Master Protein Accessions	# Missed Cleavages	Theo. MH+ [Da]	Confidence (by Search Engine): Sequest HT	Percolator q-Value (by Search Engine): Sequest HT	Percolator PEP (by Search Engine): Sequest HT	XCorr (by Search Engine): Sequest HT
	High	SLGLVVSVNAEPAK		0.00069838	0.000649755	1	1	1	YDL185W	0	1383.78	High	0.0004637	0.0008914	3.69
	High	NVSMIADSSSR	1xOxidation [M4]	0.000442841	0.000649755	1	1	1	YDL185W	0	1182.54	High	0.0004637	0.0007755	2.13
	High	DLSLLGSHVR		0.000272561	0.000649755	1	1	1	YDL185W	0	1096.61	High	0.0004637	0.0006698	2.66
	High	SALSDSDKITLDVATLIK		0.0108455	0.00106559	1	1	1	YDL185W	1	1890.04	High	0.00103	0.003663	2.62
	High	EILSNAEELEQVVQLVGK		0.00885085	0.00106559	1	1	1	YDL185W	0	1998.08	High	0.00103	0.003092	1.88
	High	ANELVESYR		0.00660089	0.00106559	1	1	1	YDL185W	0	1080.53	High	0.0009108	0.002466	2.6
	High	VTEYAEK		0.00940009	0.00106559	1	1	1	YDL185W	0	839.415	High	0.00103	0.00324	2.06
	High	ATFSVDSR		0.00660089	0.00106559	1	1	1	YDL185W	0	882.432	High	0.0009108	0.002468	2.18
	High	LADSTGDVK		0.00585314	0.00106559	1	1	1	YDL185W	0	905.457	High	0.0009108	0.002274	1.92
	High	ETFLAGLIDSDGYVTDEHGIK		0.00399155	0.00106559	1	1	1	YDL185W	0	2280.1	High	0.0009108	0.001807	2.63
	High	ITLDVATLIK		0.0199597	0.00210976	1	1	1	YDL185W	0	1086.68	High	0.001767	0.006744	2.7
	High	AVALGSPDR		0.0271665	0.00216078	1	1	1	YDL185W	0	885.479	High	0.001783	0.00961	2.68
	High	LASFYER		0.0282057	0.00216078	1	1	1	YDL185W	0	885.446	High	0.001783	0.01004	1.56
	High	YTNVLNK		0.0318023	0.00239809	1	1	1	YDL185W	0	851.462	High	0.001955	0.01159	1.96
	High	DTSLMER		0.0401017	0.00398433	1	1	1	YDL185W	0	851.393	High	0.003118	0.01557	1.42
	High	FTCNATHELVVR	1xCarbamidomethyl [C3]	0.0435293	0.00489376	1	1	1	YDL185W	0	1446.72	High	0.003872	0.01725	1.7
	High	DTSLMER	1xOxidation [M5]	0.0451802	0.0050128	1	1	1	YDL185W	0	867.388	High	0.003872	0.01805	1.47
	High	GVEYFEVITFEMGQK	1xOxidation [M12]	0.0547939	0.00576207	1	1	1	YDL185W	0	1792.85	High	0.00459	0.02318	1.21
High	Master Protein	YKR071C	DRE2 SGDID:S000001779, Chr XI from 575980-574934, Genome Release 64-2-1, reverse complement, Verified ORF, "Component of the cytosolic Fe-S protein assembly (CIA) machinery; contains an Fe-S cluster that receives electrons from NADPH via the action of Tah18pin an early step in the CIA pathway; ortholog of human Ciapin1; protein abundance increases in response to DNA replication stress"	0	42.412	41	11	14	11	1	348	38.5	5.31	42.18	11
	Confidence	Sequence	Modifications	Qvality PEP	Qvality q-value	# Protein Groups	# Proteins	# PSMs	Master Protein Accessions	# Missed Cleavages	Theo. MH+ [Da]	Confidence (by Search Engine): Sequest HT	Percolator q-Value (by Search Engine): Sequest HT	Percolator PEP (by Search Engine): Sequest HT	XCorr (by Search Engine): Sequest HT
	High	LNDGSITLENAK		2.38919e-05	0	1	1	1	YKR071C	0	1274.66	High	0	0.0002455	3.56
	High	TGLLLIHPAVTTTPELVENTK		8.52531e-06	0	1	1	1	YKR071C	0	2247.26	High	0	0.0001498	4.06
	High	YETVHYLTPEAQTDIKFPK		5.58469e-07	0	1	1	2	YKR071C	1	2280.15	High	0	3.904e-05	5.61
	High	YETVHYLTPEAQTDIK		4.23649e-07	0	1	1	1	YKR071C	0	1907.94	High	0	3.409e-05	3.88
	High	LISVLADSLKPNGSLIGLSDIYK		0.000398885	0.000649755	1	1	1	YKR071C	0	2416.37	High	0.0004637	0.0007519	2.7
	High	ASSSTSNLPSFK		0.00050655	0.000649755	1	1	1	YKR071C	0	1225.61	High	0.0004637	0.0008077	2.9
	High	ETDSFKPPSFK		0.000643295	0.000649755	1	1	2	YKR071C	0	1282.63	High	0.0004637	0.0008695	3.24
	High	FVDQFLINK		0.00175134	0.000649755	1	1	1	YKR071C	0	1123.61	High	0.0004637	0.001241	3
	High	SMITMITCGK	1xCarbamidomethyl [C8]; 1xOxidation [M5]	0.00839674	0.00106559	1	1	1	YKR071C	0	1157.54	High	0.00103	0.002952	1.76
	High	LNQTVSIPLKK		0.0124199	0.00132229	1	1	2	YKR071C	1	1240.76	High	0.001205	0.004164	3
	High	VGGCGSCSLGDAFR	2xCarbamidomethyl [C4; C7]	0.0284182	0.00216078	1	1	1	YKR071C	0	1442.62	High	0.001783	0.01015	1.15
High	Master Protein	YFL016C	MDJ1 SGDID:S000001878, Chr VI from 106236-104701, Genome Release 64-2-1, reverse complement, Verified ORF, "Co-chaperone that stimulates HSP70 protein Ssc1p ATPase activity; involved in protein folding/refolding in the mitochodrial matrix; required for proteolysis of misfolded proteins; member of the HSP40 (DnaJ) family of chaperones"	0	42.15	34	14	15	14	1	511	55.5	9.22	42.6	14
	Confidence	Sequence	Modifications	Qvality PEP	Qvality q-value	# Protein Groups	# Proteins	# PSMs	Master Protein Accessions	# Missed Cleavages	Theo. MH+ [Da]	Confidence (by Search Engine): Sequest HT	Percolator q-Value (by Search Engine): Sequest HT	Percolator PEP (by Search Engine): Sequest HT	XCorr (by Search Engine): Sequest HT
	High	IPGQGSYPDIAVEADLKDSVK		2.39019e-08	0	1	1	1	YFL016C	1	2202.13	High	0	8.158e-06	5.71
	High	FHDLQNAYEILSDETK		3.44476e-05	0	1	1	1	YFL016C	0	1922.91	High	0	0.0002906	3.57
	High	LENFITNTFR		9.65374e-05	0	1	1	1	YFL016C	0	1254.65	High	0	0.0004568	3.19
	High	TMQPGTAAGTAINEEILKK	1xOxidation [M2]	1.2083e-07	0	1	1	1	YFL016C	1	1989.03	High	0	1.829e-05	4.42
	High	KTMQPGTAAGTAINEEILK	1xOxidation [M3]	0.000398885	0.000649755	1	1	1	YFL016C	1	1989.03	High	0.0004637	0.0007511	4.2
	High	VAPGTQYNQVISIPNMGVPK	1xOxidation [M16]	0.000234751	0.000649755	1	1	1	YFL016C	0	2129.11	High	0.0004637	0.000637	4.26
	High	EIPITTAALGGTVTIPTVEGQK		0.00203404	0.00106559	1	1	1	YFL016C	0	2196.21	High	0.0008405	0.001322	2.21
	High	TMQPGTAAGTAINEEILK	1xOxidation [M2]	0.00808676	0.00106559	1	1	1	YFL016C	0	1860.94	High	0.00103	0.002867	3.26
	High	TITVDLPHGLQDGDVVR		0.00655146	0.00106559	1	1	1	YFL016C	0	1834.97	High	0.0009108	0.002458	1.97
	High	GDPIEIVHK		0.0108455	0.00106559	1	1	1	YFL016C	0	1007.55	High	0.00103	0.003676	1.63
	High	CLWEALADVTNDDMAK	1xCarbamidomethyl [C1]; 1xOxidation [M14]	0.013291	0.00132229	1	1	1	YFL016C	0	1867.82	High	0.001205	0.004453	2.14
	High	DAVFGSK		0.0154517	0.00162885	1	1	1	YFL016C	0	723.367	High	0.001424	0.005158	1.94
	High	KPQSLAEK		0.0240893	0.00216078	1	1	2	YFL016C	0	900.515	High	0.00459	0.02261	2.37
	High	SATGAEIK		0.0310951	0.00239809	1	1	1	YFL016C	0	776.415	High	0.001955	0.01136	2.07
High	Master Protein	YJL014W	CCT3 SGDID:S000003551, Chr X from 407558-409162, Genome Release 64-2-1, Verified ORF, "Subunit of the cytosolic chaperonin Cct ring complex; related to Tcp1p, required for the assembly of actin and tubulins in vivo; capable of binding Q/N rich proteins and mediating their folding"	0	41.841	41	17	17	17	1	534	58.8	6.11	38.1	17
	Confidence	Sequence	Modifications	Qvality PEP	Qvality q-value	# Protein Groups	# Proteins	# PSMs	Master Protein Accessions	# Missed Cleavages	Theo. MH+ [Da]	Confidence (by Search Engine): Sequest HT	Percolator q-Value (by Search Engine): Sequest HT	Percolator PEP (by Search Engine): Sequest HT	XCorr (by Search Engine): Sequest HT
	High	KGESQTNIEIEKEEDWNR		0.000117223	0	1	1	1	YJL014W	2	2205.04	High	0	0.0004951	4.95
	High	NIHPVIIIQALK		0.000414059	0.000649755	1	1	1	YJL014W	0	1358.85	High	0.0004637	0.0007603	3.33
	High	NLQDAMAVAR	1xOxidation [M6]	0.000387148	0.000649755	1	1	1	YJL014W	0	1104.55	High	0.0004637	0.0007442	2.68
	High	IPGGDVLDSR		0.00146356	0.000649755	1	1	1	YJL014W	0	1028.54	High	0.0004637	0.001156	2.14
	High	NVMLSPSLSPGGGATEMAVSVK	2xOxidation [M3; M17]	0.00171247	0.000649755	1	1	1	YJL014W	0	2164.06	High	0.0004637	0.001232	2.76
	High	MLLDPMGGLVLTNDGHAILR	2xOxidation [M1; M6]	0.00905294	0.00106559	1	1	1	YJL014W	0	2168.12	High	0.00103	0.003149	2.79
	High	ALTDALEVIK		0.00231002	0.00106559	1	1	1	YJL014W	0	1072.62	High	0.0008405	0.001395	2.2
	High	VTGATIVNR		0.00278555	0.00106559	1	1	1	YJL014W	0	930.537	High	0.0009108	0.00151	2.2
	High	VVLLDCPLEYK	1xCarbamidomethyl [C6]	0.00905294	0.00106559	1	1	1	YJL014W	0	1348.72	High	0.00103	0.003154	2.73
	High	TAIESACLLLR	1xCarbamidomethyl [C7]	0.00871864	0.00106559	1	1	1	YJL014W	0	1246.68	High	0.00103	0.003051	2.06
	High	QVSKPVDVENDAAMK	1xOxidation [M14]	0.0167862	0.00191257	1	1	1	YJL014W	0	1646.81	High	0.001627	0.005601	2.31
	High	HAQGNFTTGIDGDKGK		0.0171698	0.00210976	1	1	1	YJL014W	1	1645.79	High	0.001767	0.005764	2.55
	High	SMLELSR	1xOxidation [M2]	0.0237298	0.00216078	1	1	1	YJL014W	0	851.429	High	0.001783	0.008197	1.75
	High	ESDVGTNCGLFK	1xCarbamidomethyl [C8]	0.036119	0.00335822	1	1	1	YJL014W	0	1326.6	High	0.002654	0.01359	1.92
	High	VDDIVSGVR		0.05439	0.00576207	1	1	1	YJL014W	0	959.516	High	0.00459	0.02292	1.73
	High	DLGQTVEGEPNFEIDIK		0.0568568	0.0063287	1	1	1	YJL014W	0	1903.93	High	0.004998	0.02429	1.21
	High	LIQASIGTK		0.0639721	0.00669503	1	1	1	YJL014W	0	930.562	High	0.0054	0.0283	1.35
High	Master Protein	YJR001W	AVT1 SGDID:S000003761, Chr X from 436802-438610, Genome Release 64-2-1, Verified ORF, "Vacuolar transporter; imports large neutral amino acids into the vacuole; member of a family of seven S. cerevisiae genes (AVT1-7) related to vesicular GABA-glycine transporters"	0	41.685	24	13	16	13	1	602	65.3	8.12	43.23	13
	Confidence	Sequence	Modifications	Qvality PEP	Qvality q-value	# Protein Groups	# Proteins	# PSMs	Master Protein Accessions	# Missed Cleavages	Theo. MH+ [Da]	Confidence (by Search Engine): Sequest HT	Percolator q-Value (by Search Engine): Sequest HT	Percolator PEP (by Search Engine): Sequest HT	XCorr (by Search Engine): Sequest HT
	High	RFTNNDMDSIVVK	1xOxidation [M7]	2.73291e-05	0	1	1	1	YJR001W	1	1554.76	High	0	0.0002616	4.01
	High	QSILDHPVGSFK		9.79899e-05	0	1	1	1	YJR001W	0	1327.7	High	0	0.0004591	3.7
	High	FTNNDMDSIVVK	1xOxidation [M6]	0.000222796	0	1	1	1	YJR001W	0	1398.66	High	0	0.0006275	3.03
	High	RQSILDHPVGSFK		0.000473625	0.000649755	1	1	1	YJR001W	1	1483.8	High	0.0004637	0.0007903	2.84
	High	NVLLTEGYPK		0.000643295	0.000649755	1	1	1	YJR001W	0	1133.62	High	0.0004637	0.0008677	2.83
	High	FTNNDMDSIVVK		0.000238283	0.000649755	1	1	1	YJR001W	0	1382.66	High	0.0004637	0.0006405	3.05
	High	RLSVTLNNAGRPR		0.0060317	0.00106559	1	1	1	YJR001W	1	1453.83	High	0.0009108	0.002323	3.12
	High	SEVHYISIPLNR		0.00375913	0.00106559	1	1	3	YJR001W	0	1427.76	High	0.0009108	0.002054	2.54
	High	LSVTLNNAGRPR		0.00393212	0.00106559	1	1	1	YJR001W	0	1297.73	High	0.0009108	0.001791	2.75
	High	SSSPGSLVNPMETSMWPIDLK	2xOxidation [M11; M15]	0.0108455	0.00106559	1	1	1	YJR001W	0	2308.08	High	0.00103	0.003668	2.09
	High	ESNDETYDPDTLAPALDGR		0.00238023	0.00106559	1	1	1	YJR001W	0	2078.91	High	0.0009108	0.00141	3.61
	High	GSAFSPDDSVSQFQSDGFMTR		0.01981	0.00210976	1	1	1	YJR001W	0	2265.97	High	0.001767	0.006714	2.88
	High	FVYGLISALMTIIPIAK	1xOxidation [M10]	0.0187932	0.00210976	1	1	1	YJR001W	0	1866.08	High	0.001767	0.006327	1.32
	High	GVNSLSR		0.046892	0.0050128	1	1	1	YJR001W	0	732.4	High	0.003872	0.01897	2.03
High	Master Protein	YBR263W	SHM1 SGDID:S000000467, Chr II from 736264-737736, Genome Release 64-2-1, Verified ORF, "Mitochondrial serine hydroxymethyltransferase; converts serine to glycine plus 5,10 methylenetetrahydrofolate; involved in generating precursors for purine, pyrimidine, amino acid, and lipid biosynthesis; reverse reaction generates serine"	0	41.174	37	16	16	16	1	490	53.7	8.72	39.65	16
	Confidence	Sequence	Modifications	Qvality PEP	Qvality q-value	# Protein Groups	# Proteins	# PSMs	Master Protein Accessions	# Missed Cleavages	Theo. MH+ [Da]	Confidence (by Search Engine): Sequest HT	Percolator q-Value (by Search Engine): Sequest HT	Percolator PEP (by Search Engine): Sequest HT	XCorr (by Search Engine): Sequest HT
	High	LVSGGTDNHLIVIDLSGTQVDGAR		4.47368e-05	0	1	1	1	YBR263W	0	2437.27	High	0	0.0003278	4.08
	High	AVMDLLGSELQNK	1xOxidation [M3]	3.36845e-05	0	1	1	1	YBR263W	0	1433.73	High	0	0.000288	3.72
[truncated: 3,790 more rows]

## Sheet: Processing
================================================================================
Processing Step A: Workflow
================================================================================
Result name: AC101118_110918_CP35_trypsin_digest
Result file: Y:\pipeline\ProteomicsLab\acapaldi\2018\110918\AC101118_110918_PD2_2\AC101118_110918_CP35_trypsin_digest.msf
Description: Basic processing workflow with score threshold validation to be used for searches of low complexity samples or employing a small FASTA database. Specify the FASTA database and any additional modifications.
Workflow based on template: PWF_Fusion_Basic_SequestHT_Percolator
Creation date: 11/13/2018 9:26:38 AM
Created with Discoverer version: 2.2.0.388
------------------------------------------------------------------
The pipeline tree:
------------------------------------------------------------------
|-(6) Spectrum Files
|-(1) Spectrum Selector
|-(2) Sequest HT
|-(4) Percolator
|-(5) ptmRS
------------------------------------------------------------------
Processing node 6: Spectrum Files
------------------------------------------------------------------
Input Data:
#NAME?
------------------------------------------------------------------
Processing node 1: Spectrum Selector
------------------------------------------------------------------
1. General Settings:
#NAME?
- Use New Precursor Reevaluation: True
- Use Isotope Pattern in Precursor Reevaluation: True
2. Spectrum Properties Filter:
- Lower RT Limit: 0
- Upper RT Limit: 0
- First Scan: 0
- Last Scan: 0
- Lowest Charge State: 0
- Highest Charge State: 0
- Min. Precursor Mass: 350 Da
- Max. Precursor Mass: 5000 Da
- Total Intensity Threshold: 0
- Minimum Peak Count: 1
3. Scan Event Filters:
#NAME?
- Min. Collision Energy: 0
- Max. Collision Energy: 1000
#NAME?
4. Peak Filters:
- S/N Threshold (FT-only): 1.5
5. Replacements for Unrecognized Properties:
#NAME?
#NAME?
#NAME?
#NAME?
- Unrecognized Polarity Replacements: +
- Unrecognized MS Resolution@200 Replacements: 60000
- Unrecognized MSn Resolution@200 Replacements: 30000
6. Precursor Pattern Extraction:
- Precursor Clipping Range Before: 2.5 Da
- Precursor Clipping Range After: 5.5 Da
------------------------------------------------------------------
Processing node 2: Sequest HT
------------------------------------------------------------------
1. Input Data:
- Protein Database:
	cRAP_012915_NP.fasta
	SGD_yeast_111814_Contam.fasta
#NAME?
- Max. Missed Cleavage Sites: 2
- Min. Peptide Length: 6
- Max. Peptide Length: 144
- Max. Number of Peptides Reported: 10
2. Tolerances:
- Precursor Mass Tolerance: 10 ppm
- Fragment Mass Tolerance: 0.6 Da
- Use Average Precursor Mass: False
- Use Average Fragment Mass: False
3. Spectrum Matching:
- Use Neutral Loss a Ions: True
- Use Neutral Loss b Ions: True
- Use Neutral Loss y Ions: True
- Use Flanking Ions: True
- Weight of a Ions: 0
- Weight of b Ions: 1
- Weight of c Ions: 0
- Weight of x Ions: 0
- Weight of y Ions: 1
- Weight of z Ions: 0
4. Dynamic Modifications:
- Max. Equal Modifications Per Peptide: 3
- Max. Dynamic Modifications Per Peptide: 4
- 1. Dynamic Modification: Oxidation / +15.995 Da (M)
- 2. Dynamic Modification: Carbamidomethyl / +57.021 Da (C)
- 3. Dynamic Modification: Phospho / +79.966 Da (S, T)
6. Dynamic Modifications (protein terminus):
- 1. N-Terminal Modification: Acetyl / +42.011 Da (N-Terminus)
------------------------------------------------------------------
Processing node 4: Percolator
------------------------------------------------------------------
1. Input Data:
- Maximum Delta Cn: 0.05
- Maximum Rank: 0
2. Decoy Database Search:
- Target FDR (Strict): 0.01
- Target FDR (Relaxed): 0.05
#NAME?
------------------------------------------------------------------
Processing node 5: ptmRS
------------------------------------------------------------------
1. Scoring:
- PhosphoRS Mode: False
- Report Only PTMs: True
- Use Diagnostic Ions: True
- Use Fragment Mass Tolerance of Search Node: True
- Fragment Mass Tolerance: 0.5 Da
#NAME?
- Maximum Peak Depth: 8
- Use a mass accuracy correction: False
2. Performance:
- Maximum Number of Position Isoforms: 500
- Maximum PTMs per peptide: 10
------------------------------------------------------------------
Workflow messages:
------------------------------------------------------------------
2018-11-13 09:26:00	Job Execution:	Processing Y:\pipeline\ProteomicsLab\acapaldi\2018\110918\AC101118_110918_PD2_2\AC101118_110918_CP35_trypsin_digest.msf
2018-11-13 09:27:00	(1):Spectrum Selector:	Reading from file 1 of 1 F4: Y:\pipeline\ProteomicsLab\acapaldi\2018\110918\AC101118_110918_CP35_trypsin_digest.raw (78654 spectra total)
2018-11-13 09:27:00	(2):Sequest HT:	Sequence Database: cRAP_012915_NP.fasta
2018-11-13 09:27:00	(2):Sequest HT:	Sequence Database: SGD_yeast_111814_Contam.fasta
2018-11-13 09:32:00	(1):Spectrum Selector:	There were 311 invalid spectra in the file F4: Y:\pipeline\ProteomicsLab\acapaldi\2018\110918\AC101118_110918_CP35_trypsin_digest.raw.
2018-11-13 09:32:00	(1):Spectrum Selector:	Sent 62742 spectra from file F4.
2018-11-13 09:32:00	(1):Spectrum Selector:	Sent 62742 spectra from 1 files (processing time: 2 min 52 s).
2018-11-13 09:32:00	(1):Spectrum Selector:	-- Total execution of Spectrum Selector (1) took 5 min 29 s --
2018-11-13 09:32:00	(2):Sequest HT:	Storing spectra took 2 min 31 s.
2018-11-13 09:32:00	(2):Sequest HT:	There is already an adequate target FASTA index for cRAP_012915_NP(56ef4fce-6774-47c4-a9db-85224bc07264).fasta.
2018-11-13 09:32:00	(2):Sequest HT:	There is already an adequate target FASTA index for SGD_yeast_111814_Contam(5f9b749f-d9bb-4458-b871-8366a30f5d9c).fasta.
2018-11-13 09:32:00	(2):Sequest HT:	Start Sequest HT target search for 62742 spectra...
2018-11-13 09:32:00	(2):Sequest HT:	ISE (1.1.0.178, x64) started at 11/13/2018 9:32:28 AM on SR-2UA038077T (x64) [8 CPUs] running Microsoft Windows NT 6.1.7601 Service Pack 1 (64bit) [.NET: 4.0.30319.42000]
2018-11-13 09:32:00	(2):Sequest HT:	Workload level: #parallel tasks: 8
2018-11-13 09:32:00	(2):Sequest HT:	Workload level: #spectra loaded and processed at once: 8000
2018-11-13 09:32:00	(2):Sequest HT:	On-Disk search is performed
2018-11-13 09:34:00	(2):Sequest HT:	3038 spectra were not used for search.
2018-11-13 09:34:00	(2):Sequest HT:	Average search time per spectrum was 2.2 ms.
2018-11-13 09:34:00	(2):Sequest HT:	Performing target search containing 62742 spectra took 2 min 10 s.
2018-11-13 09:35:00	(2):Sequest HT:	Stored 61691 PSMs for 59704 spectra
2018-11-13 09:35:00	(2):Sequest HT:	Discarded 168486 peptide(s) that did not match the conditions for protein terminal modifications.
2018-11-13 09:35:00	(2):Sequest HT:	Reading search results took 19.4 s.
2018-11-13 09:35:00	(2):Sequest HT:	Saving results took 22.1 s.
2018-11-13 09:35:00	(2):Sequest HT:	Saving proteins took 17.6 s.
2018-11-13 09:35:00	(2):Sequest HT:	Reading results took 1 min 1 s.
2018-11-13 09:35:00	(2):Sequest HT:	There is already an adequate decoy FASTA index for cRAP_012915_NP(56ef4fce-6774-47c4-a9db-85224bc07264)_reversed.fasta.
2018-11-13 09:35:00	(2):Sequest HT:	There is already an adequate decoy FASTA index for SGD_yeast_111814_Contam(5f9b749f-d9bb-4458-b871-8366a30f5d9c)_reversed.fasta.
2018-11-13 09:35:00	(2):Sequest HT:	Start Sequest HT decoy search for 62742 spectra...
2018-11-13 09:35:00	(2):Sequest HT:	ISE (1.1.0.178, x64) started at 11/13/2018 9:35:41 AM on SR-2UA038077T (x64) [8 CPUs] running Microsoft Windows NT 6.1.7601 Service Pack 1 (64bit) [.NET: 4.0.30319.42000]
2018-11-13 09:35:00	(2):Sequest HT:	Workload level: #parallel tasks: 8
2018-11-13 09:35:00	(2):Sequest HT:	Workload level: #spectra loaded and processed at once: 8000
2018-11-13 09:35:00	(2):Sequest HT:	On-Disk search is performed
2018-11-13 09:37:00	(2):Sequest HT:	3038 spectra were not used for search.
2018-11-13 09:37:00	(2):Sequest HT:	Average search time per spectrum was 2.1 ms.
2018-11-13 09:37:00	(2):Sequest HT:	Performing decoy search containing 62742 spectra took 2 min 7 s.
2018-11-13 09:38:00	(2):Sequest HT:	Stored 126761 decoy PSMs for 59704 spectra
2018-11-13 09:38:00	(2):Sequest HT:	Discarded 174075 peptide(s) that did not match the conditions for protein terminal modifications.
2018-11-13 09:38:00	(2):Sequest HT:	Reading search results took 15.7 s.
2018-11-13 09:38:00	(2):Sequest HT:	Saving results took 19.7 s.
2018-11-13 09:38:00	(2):Sequest HT:	Saving proteins took 13.4 s.
2018-11-13 09:38:00	(2):Sequest HT:	Reading results took 49.5 s.
2018-11-13 09:38:00	(2):Sequest HT:	Finalizing search results...
2018-11-13 09:39:00	(2):Sequest HT:	-- Total search time was 6 min 15 s --
2018-11-13 09:44:00	(4):Percolator:	Creating input file for Sequest HT (2) took 5 min 6 s.
2018-11-13 09:44:00	(4):Percolator:	The input file contains 61691 PSMs, 65070 decoy PSMs and 32 features.
2018-11-13 09:44:00	(4):Percolator:	Percolator version 3.00, Build Date Jun 8 2016 22:06:25
2018-11-13 09:44:00	(4):Percolator:	Copyright (c) 2006-9 University of Washington. All rights reserved.
2018-11-13 09:44:00	(4):Percolator:	Written by Lukas K├ñll (lukall@u.washington.edu) in the
2018-11-13 09:44:00	(4):Percolator:	Department of Genome Sciences at the University of Washington.
2018-11-13 09:44:00	(4):Percolator:	Issued command:
2018-11-13 09:44:00	(4):Percolator:	C:\Program Files\Thermo\Proteome Discoverer 2.2\Tools\Percolator\percolator.exe -s -X C:\ProgramData\Thermo\Proteome Discoverer 2.2\Scratch\Job2441\Percol(4)\output.xml -Z -y -k C:\ProgramData\Thermo\Proteome Discoverer 2.2\Scratch\Job2441\Percol(4)\input.xml
2018-11-13 09:44:00	(4):Percolator:	Started Tue Nov 13 09:44:58 2018
2018-11-13 09:44:00	(4):Percolator:	Hyperparameters selectionFdr=0.01, Cpos=0, Cneg=0, maxNiter=10
2018-11-13 09:44:00	(4):Percolator:	Reading input from datafile C:\ProgramData\Thermo\Proteome Discoverer 2.2\Scratch\Job2441\Percol(4)\input.xml
2018-11-13 09:44:00	(4):Percolator:	enzyme=Trypsin
2018-11-13 09:45:00	(4):Percolator:	Features:
2018-11-13 09:45:00	(4):Percolator:	XCorr Delta Cn From Second PSM Binomial Score Delta Mass [Da] Delta Mass [ppm] Absolute Delta Mass [Da] Absolute Delta Mass [ppm] Peptide Length Is z=1 Is z=2 Is z=3 Is z=4 Is z=5 Is z>5 # Missed Cleavages Log Peptides Matched Log Total Intensity Fraction Matched Intensity [%] Fragment Coverage Series A, B, C [%] Fragment Coverage Series X, Y, Z [%] Log Matched Fragment Series Intensities A, B, C…
2018-11-13 09:46:00	(4):Percolator:	Train/test set contains 61691 positives and 65070 negatives, size ratio=0.948071 and pi0=1
2018-11-13 09:46:00	(4):Percolator:	selecting cpos by cross validation
2018-11-13 09:46:00	(4):Percolator:	selecting cneg by cross validation
2018-11-13 09:46:00	(4):Percolator:	Selected feature number 26 as initial search direction, could separate 1930 positives in that direction
2018-11-13 09:46:00	(4):Percolator:	Selected feature number 26 as initial search direction, could separate 1881 positives in that direction
2018-11-13 09:46:00	(4):Percolator:	Selected feature number 26 as initial search direction, could separate 1695 positives in that direction
2018-11-13 09:46:00	(4):Percolator:	Estimating 2701 over q=0.01 in initial direction
2018-11-13 09:46:00	(4):Percolator:	Reading in data and feature calculation took 81.835 cpu seconds or 82 seconds wall time
2018-11-13 09:46:00	(4):Percolator:	#NAME?
2018-11-13 09:46:00	(4):Percolator:	Iteration 1 :	After the iteration step, 4579 target PSMs with q<0.01 were estimated by cross validation
2018-11-13 09:46:00	(4):Percolator:	Iteration 2 :	After the iteration step, 5110 target PSMs with q<0.01 were estimated by cross validation
2018-11-13 09:46:00	(4):Percolator:	Iteration 3 :	After the iteration step, 5433 target PSMs with q<0.01 were estimated by cross validation
2018-11-13 09:46:00	(4):Percolator:	Iteration 4 :	After the iteration step, 5620 target PSMs with q<0.01 were estimated by cross validation
2018-11-13 09:46:00	(4):Percolator:	Iteration 5 :	After the iteration step, 5734 target PSMs with q<0.01 were estimated by cross validation
2018-11-13 09:46:00	(4):Percolator:	Iteration 6 :	After the iteration step, 5816 target PSMs with q<0.01 were estimated by cross validation
2018-11-13 09:46:00	(4):Percolator:	Iteration 7 :	After the iteration step, 5857 target PSMs with q<0.01 were estimated by cross validation
2018-11-13 09:46:00	(4):Percolator:	Iteration 8 :	After the iteration step, 5872 target PSMs with q<0.01 were estimated by cross validation
2018-11-13 09:47:00	(4):Percolator:	Iteration 9 :	After the iteration step, 5890 target PSMs with q<0.01 were estimated by cross validation
2018-11-13 09:47:00	(4):Percolator:	Iteration 10 :	After the iteration step, 5890 target PSMs with q<0.01 were estimated by cross validation
2018-11-13 09:47:00	(4):Percolator:	Obtained weights (only showing weights of first cross validation set)
2018-11-13 09:47:00	(4):Percolator:	# first line contains normalized weights, second line the raw weights
2018-11-13 09:47:00	(4):Percolator:	0.587	0.4321	0.7702	-0.003	0.8702	-0.6842	1.4767	0.3426	-1.1883	-1.231	-0.6051	0.4638	0.1109	-0.0467	0	0	-0.8519	0.3323	-1.1591	0.2214	-0.3773	0.0273	-0.3654	0.7588	0.0418	0.5932	0.5365	-0.6829	-0.0928	-0.0437	-0.5529	-5.4277
2018-11-13 09:47:00	(4):Percolator:	0.9081	0.8938	0.0323	-0.0001	0.0012	-179.497	0.2875	157.246	-0.4287	-0.191	-1.3757	0.95	0.2443	-0.2045	0	0	-1.0769	0.6007	-2.0967	0.032	-0.022	0.0013	-0.2121	0.4219	0.0357	0.3476	3.6705	-0.0023	-0.9653	-0.0002	-6.7909	1.7647
2018-11-13 09:47:00	(4):Percolator:	After all training done, 5740 target PSMs with q<0.0100 were found when measuring on the test set
2018-11-13 09:47:00	(4):Percolator:	Found 5740 target PSMs scoring over 1.0000% FDR level on testset
2018-11-13 09:47:00	(4):Percolator:	Merging results from 3 datasets
2018-11-13 09:47:00	(4):Percolator:	Tossing out "redundant" PSMs keeping only the best scoring PSM for each unique peptide.
2018-11-13 09:47:00	(4):Percolator:	Selecting pi_0=0.8818
2018-11-13 09:47:00	(4):Percolator:	Calibrating statistics - calculating q values
2018-11-13 09:47:00	(4):Percolator:	New pi_0 estimate on merged list gives 3831 peptides over q=0.0100
2018-11-13 09:47:00	(4):Percolator:	PSMId	score	q-value	posterior_error_prob	peptide	proteinIds
2018-11-13 09:47:00	(4):Percolator:	Calibrating statistics - calculating Posterior error probabilities (PEPs)
2018-11-13 09:47:00	(4):Percolator:	Processing took 56.98 cpu seconds or 57 seconds wall time
2018-11-13 09:48:00	(4):Percolator:	5838/70 high confident target/decoy peptides were found for Sequest HT (2).
2018-11-13 09:48:00	(4):Percolator:	1557/375 medium confident target/decoy peptides were found for Sequest HT (2).
2018-11-13 09:48:00	(4):Percolator:	-- Total execution of Percolator (64Bit) for Sequest HT (2) took 8 min 25 s --
2018-11-13 09:48:00	(5):ptmRS:	Waiting finish of other ptmRS instance
2018-11-13 09:50:00	(5):ptmRS:	Starting ptmRS node 2.0, ptmRS 2.2.5967.19588 - based on phosphoRS3 Taus T. et al., J. Proteome Res. 2011, 10, 5354-62
2018-11-13 09:50:00	(5):ptmRS:	More nodes and documentations can be found here http://ms.imp.ac.at/?goto=pd-nodes.
2018-11-13 09:50:00	(5):ptmRS:	Scoring with ptmRS (2.2.5967.19588) for Sequest HT (2) with a fragment ion mass tolerance of 0.6 m/z allowing a maximum of 10 PTMs with neutral loss and 500 isoforms per peptide.
2018-11-13 09:50:00	(5):ptmRS:	(5) Localizing 1xPhospho, elementTarget: S (delta mass: 79.9663, Neutral-losses:-H(3) O(4) P - 97.976896)
2018-11-13 09:50:00	(5):ptmRS:	(5) Localizing 1xPhospho, elementTarget: T (delta mass: 79.9663, Neutral-losses:-H(3) O(4) P - 97.976896)
2018-11-13 09:50:00	(5):ptmRS:	(5) FITs for CID_CAD: b, y; FITs with NLs: no
2018-11-13 09:50:00	(5):ptmRS:	(5) FITs for HCD: b, y; FITs with NLs: b, y
2018-11-13 09:50:00	(5):ptmRS:	(5) FITs for ECD_ETD: c, zRadical, zPrime; FITs with NLs: no
2018-11-13 09:52:00	(5):ptmRS:	(5) FITs for EThcD: b, y, c, zRadical, zPrime; FITs with NLs: b, y
2018-11-13 09:52:00	(5):ptmRS:	(5) Workload level: #spectra: 62742.
2018-11-13 09:52:00	(5):ptmRS:	(5) Workload level: #spectra per package: 40000.
2018-11-13 09:52:00	(5):ptmRS:	(5) Workload level: #parallel tasks: 8.
2018-11-13 09:52:00	(5):ptmRS:	(5) Finished collecting spectra
2018-11-13 09:53:00	(5):ptmRS:	Writing current ptmRS results to file. Puffer has following size 27413
2018-11-13 09:54:00	(5):ptmRS:	-- Total execution of ptmRS (5) took 3 min 29 s --
2018-11-13 09:54:00	Job Execution:	Finalizing spectra took 4.7 s.
2018-11-13 09:54:00	Job Execution:	Finalizing tables took 26.3 ms.
2018-11-13 09:54:00	Job Execution:	Finished Y:\pipeline\ProteomicsLab\acapaldi\2018\110918\AC101118_110918_PD2_2\AC101118_110918_CP35_trypsin_digest.msf
2018-11-13 09:54:00	Job Execution:	----- Total Job execution took: 27 min 30 s. -----

## Sheet: Consensus
================================================================================
Consensus Step Workflow
================================================================================
Result name: AC101118_110918_CP35_trypsin_digest
Result file: Y:\proteomics-home\pipeline\ProteomicsLab\acapaldi\2018\110918\AC101118_110918_PD2_2\AC101118_110918_CP35_trypsin_digest.pdResult
Description: Result filtered for high confident peptides.
Workflow based on template: CWF_Basic_Exporter
Creation date: 11/13/2018 9:26:41 AM
Created with Discoverer version: 2.2.0.388
------------------------------------------------------------------
The pipeline tree:
------------------------------------------------------------------
|-(0) MSF Files
|-(1) PSM Grouper
|-(2) Peptide Validator
|-(3) Peptide and Protein Filter
|-(4) Protein Scorer
|-(5) Protein Grouping
|-(6) Protein FDR Validator
Post-processing nodes:
--------------------------------
|-(7) Display Settings
|-(8) Result Exporter
|-(9) Result Statistics
------------------------------------------------------------------
Processing node 0: MSF Files
------------------------------------------------------------------
1. Storage Settings:
#NAME?
#NAME?
2. Merging of Identified Peptide and Proteins:
#NAME?
- File Limit for Automatic Merge.: 10
3. FASTA Title Line Display:
#NAME?
#NAME?
4. PSM Filters:
- Maximum Delta Cn: 0.05
- Maximum Rank: 0
- Maximum Delta Mass: 0 ppm
Hidden Parameters:
#NAME?
------------------------------------------------------------------
Processing node 1: PSM Grouper
------------------------------------------------------------------
1. Peptide Group Modifications:
- Site Probability Threshold: 75
------------------------------------------------------------------
Processing node 2: Peptide Validator
------------------------------------------------------------------
1. General Validation Settings:
#NAME?
- Target FDR (Strict) for PSMs: 0.01
- Target FDR (Relaxed) for PSMs: 0.05
- Target FDR (Strict) for Peptides: 0.01
- Target FDR (Relaxed) for Peptides: 0.05
2. Specific Validator Settings:
#NAME?
- Use Concatenated FDR Calculation for PSM Level FDR Calculation Based on Score: False
- Reset Confidences for Nodes without Decoy Search (Fixed score thresholds): False
------------------------------------------------------------------
Processing node 3: Peptide and Protein Filter
------------------------------------------------------------------
1. Peptide Filters:
#NAME?
- Keep Lower Confident PSMs: False
- Minimum Peptide Length: 6
- Remove Peptides Without Protein Reference: False
2. Protein Filters:
- Minimum Number of Peptide Sequences: 1
- Count Only Rank 1 Peptides: False
- Count Peptides Only for Top Scored Protein: False
------------------------------------------------------------------
Processing node 4: Protein Scorer
------------------------------------------------------------------
No parameters
------------------------------------------------------------------
Processing node 5: Protein Grouping
------------------------------------------------------------------
1. Protein Grouping:
- Apply strict parsimony principle: True
------------------------------------------------------------------
Processing node 6: Protein FDR Validator
------------------------------------------------------------------
1. Confidence Thresholds:
- Target FDR (Strict): 0.01
- Target FDR (Relaxed): 0.05
------------------------------------------------------------------
Processing node 7: Display Settings
------------------------------------------------------------------
1. General:
- Filter Set: ### Filter Set MasterProteinFilter.filterset contains the following filters:
### Row Filter for TargetProtein:
### Master is equal to Master
###
#NAME?
------------------------------------------------------------------
Processing node 8: Result Exporter
------------------------------------------------------------------
1. Output Data:
- R-friendly Headers: False
------------------------------------------------------------------
Processing node 9: Result Statistics
------------------------------------------------------------------
No parameters
------------------------------------------------------------------
Workflow messages:
------------------------------------------------------------------
2018-11-13 09:54:00	Job Execution:	Processing Y:\pipeline\ProteomicsLab\acapaldi\2018\110918\AC101118_110918_PD2_2\AC101118_110918_CP35_trypsin_digest.pdResult
2018-11-13 09:54:00	(0):MSF Files:	Y:\pipeline\ProteomicsLab\acapaldi\2018\110918\AC101118_110918_PD2_2\AC101118_110918_CP35_trypsin_digest.msf
2018-11-13 09:54:00	(0):MSF Files:	All 1 files are ready for processing.
2018-11-13 09:54:00	(0):MSF Files:	Warnings reported in at least one input processing workflow (check processing summary).
2018-11-13 09:54:00	(0):MSF Files:	Start transferring results of 1 msf files...
2018-11-13 09:54:00	(0):MSF Files:	Transferred 6256 Proteins to result file in 16.1 s.
2018-11-13 09:54:00	(0):MSF Files:	Transferred 6358 Decoy Proteins to result file in 22.2 s.
2018-11-13 09:57:00	(0):MSF Files:	Added 47195 Mass Spectra to result file.
2018-11-13 09:57:00	(0):MSF Files:	Added 2 traces to result file.
2018-11-13 09:57:00	(0):MSF Files:	Added 1 Input Files to result file.
2018-11-13 09:57:00	(0):MSF Files:	Added 61691 PSMs to result file.
2018-11-13 09:57:00	(0):MSF Files:	Added 65070 Decoy PSMs to result file.
2018-11-13 09:57:00	(0):MSF Files:	Added 62742 MS/MS Spectrum Info to result file.
2018-11-13 09:57:00	(0):MSF Files:	Added 2 Specialized Traces to result file.
2018-11-13 09:58:00	(0):MSF Files:	Copying data took 4 min 4 s.
2018-11-13 09:59:00	(0):MSF Files:	Find unique PSM sequences in 15.6 s.
2018-11-13 09:59:00	(0):MSF Files:	Filtering proteins took 4.5 s.
2018-11-13 10:01:00	(0):MSF Files:	-- Total execution of MSF Files (0) took 7 min 3 s --
2018-11-13 10:04:00	(1):PSM Grouper:	Found 47589 peptides.
2018-11-13 10:06:00	(1):PSM Grouper:	Found 50632 decoy peptides.
2018-11-13 10:06:00	(1):PSM Grouper:	-- Total execution of PSM Grouper (1) took 5 min 40 s --
2018-11-13 10:06:00	(2):Peptide Validator:	Start PSM and Peptide validation in 'Automatic (Control peptide level error rate if possible)' mode...
2018-11-13 10:07:00	(2):Peptide Validator:	Updated PSM confidences in 18.4 s.
2018-11-13 10:08:00	(2):Peptide Validator:	Use svm score for 'peptide' qvality run.
2018-11-13 10:08:00	(2):Peptide Validator:	Updated peptide confidences using qvality in 1 min 2 s.
2018-11-13 10:08:00	(2):Peptide Validator:	Store Max PSM confidences for peptides.
2018-11-13 10:08:00	(2):Peptide Validator:	Calculating Mascot thresholds.
2018-11-13 10:08:00	(2):Peptide Validator:	-- Total execution of Peptide Validator (2) took 1 min 30 s --
2018-11-13 10:09:00	(3):Peptide and Protein Filter:	Filter 4044/47589 Peptide Groups (43545 excluded) and 5572/61691 PSMs (56119 excluded) took: 35.7 s
2018-11-13 10:09:00	(3):Peptide and Protein Filter:	Filter 902/6256 Proteins (5354 excluded) took: 8.7 s
2018-11-13 10:09:00	(3):Peptide and Protein Filter:	Filter 49/50632 Decoy Peptide Groups (50583 excluded) and 51/65070 Decoy PSMs (65019 excluded) took: 26.8 s
2018-11-13 10:09:00	(3):Peptide and Protein Filter:	Filter 54/6358 Decoy Proteins (6304 excluded) took: 3.2 s
2018-11-13 10:10:00	(3):Peptide and Protein Filter:	Updating counts took 26.9 s.
2018-11-13 10:10:00	(3):Peptide and Protein Filter:	-- Total execution of Peptide and Protein Filter (3) took 1 min 42 s --
2018-11-13 10:10:00	(4):Protein Scorer:	Calculating Coverage and Counts
2018-11-13 10:10:00	(4):Protein Scorer:	Calculated counts and coverages in 4.1 s.
2018-11-13 10:10:00	(4):Protein Scorer:	Scoring target proteins
2018-11-13 10:10:00	(4):Protein Scorer:	Scored 902 proteins in 13.9 s.
2018-11-13 10:10:00	(4):Protein Scorer:	Scoring decoy proteins
2018-11-13 10:10:00	(4):Protein Scorer:	Scored 54 decoy proteins in 2.3 s.
2018-11-13 10:10:00	(4):Protein Scorer:	-- Total execution of Protein Scorer (4) took 21 s --
2018-11-13 10:10:00	(5):Protein Grouping:	Retrieving 728 protein groups took 65.9 ms.
2018-11-13 10:11:00	(5):Protein Grouping:	Storing, updating and connecting protein groups, PSMs and peptides took 26.7 s.
2018-11-13 10:11:00	(5):Protein Grouping:	Check 728 protein groups.
2018-11-13 10:11:00	(5):Protein Grouping:	Applying strict parsimony took 27.1 s.
2018-11-13 10:11:00	(5):Protein Grouping:	Found 716 protein groups.
2018-11-13 10:11:00	(5):Protein Grouping:	Retrieving 48 decoy protein groups took 0.2 ms.
2018-11-13 10:11:00	(5):Protein Grouping:	Storing, updating and connecting protein groups, PSMs and peptides took 15.3 s.
2018-11-13 10:11:00	(5):Protein Grouping:	Found 48 decoy protein groups.
2018-11-13 10:12:00	(5):Protein Grouping:	-- Total execution of Protein Grouping (5) took 1 min 38 s --
2018-11-13 10:12:00	(6):Protein FDR Validator:	Apply confidences based on protein scores of 902 proteins.
2018-11-13 10:12:00	(6):Protein FDR Validator:	Calculating Sum PEP Score for Proteins
2018-11-13 10:12:00	(6):Protein FDR Validator:	Calculating Sum PEP Score for Decoy Proteins
2018-11-13 10:12:00	(6):Protein FDR Validator:	-- Total execution of Protein FDR Validator (6) took 18.2 s --
2018-11-13 10:12:00	(9):Result Statistics:	-- Total execution of Result Statistics (9) took 7.4 s --
2018-11-13 10:12:00	(7):Display Settings:	Applying display filter and default layout
2018-11-13 10:12:00	(7):Display Settings:	-- Total execution of Display Settings (7) took 191.3 ms --
2018-11-13 10:12:00	(8):Result Exporter:	Start exporting results to Y:\pipeline\ProteomicsLab\acapaldi\2018\110918\AC101118_110918_PD2_2\AC101118_110918_CP35_trypsin_digest.txt...
2018-11-13 10:12:00	(8):Result Exporter:	-- Total execution of Result Exporter (8) took 10.1 s --
2018-11-13 10:13:00	Job Execution:	Finalizing file took 43.3 s.
2018-11-13 10:13:00	Job Execution:	Finished Y:\pipeline\ProteomicsLab\acapaldi\2018\110918\AC101118_110918_PD2_2\AC101118_110918_CP35_trypsin_digest.pdResult
2018-11-13 10:13:00	Job Execution:	----- Total Job execution took: 19 min 17 s. -----
